# Supplementary material for: MHC Variants Associated With Symptomatic Versus Asymptomatic SARS-CoV-2 Infection in Highly Exposed Individuals
Source: Front Immunol. 2021 Sep 28;12:742881. doi: 10.3389/fimmu.2021.742881 (PMC8506217; doi:10.3389/fimmu.2021.742881)
Supplement: Supplementary file 4 [file Table_5.xlsx]

## Sheet: All_samples
Gene	N(Covid-19[-])	Frequency(Covid-19[-])	N(Covid-19[+])	Frequency(Covid-19[+])	aa_residue	P-value
HLA-A	83	0.53012	83	0.481928	aa_10V	0.247397
HLA-A	83	0.46988	83	0.518072	aa_10L	0.247397
HLA-A	83	0.180723	83	0.144578	aa_14L	0.4625
HLA-A	83	0.819277	83	0.855422	aa_14S	0.4625
HLA-A	83	0.0060241	83	0	aa_23R	0.450342
HLA-A	83	0.993976	83	1	aa_23W	0.450342
HLA-A	83	0.156627	83	0.174699	aa_33Y	0.361333
HLA-A	83	0.240964	83	0.204819	aa_33S	0.190505
HLA-A	83	0.138554	83	0.0843373	aa_33T	0.094504
HLA-A	83	0.463855	83	0.536145	aa_33F	0.074463
HLA-A	83	0.981928	83	0.987952	aa_36V	0.403154
HLA-A	83	0.0180723	83	0.0120482	aa_36M	0.403154
HLA-A	83	0.957831	83	0.951807	aa_41R	0.931573
HLA-A	83	0.0421687	83	0.0481928	aa_41S	0.931573
HLA-A	83	0.993976	83	0.987952	aa_67Q	0.649649
HLA-A	83	0.0060241	83	0.0120482	aa_67R	0.649649
HLA-A	83	0.885542	83	0.873494	aa_68R	0.857236
HLA-A	83	0.114458	83	0.126506	aa_68K	0.857236
HLA-A	83	0.0783133	83	0.0722892	aa_80R	0.80882
HLA-A	83	0.921687	83	0.927711	aa_80G	0.80882
HLA-A	83	0.36747	83	0.463855	aa_86Q	0.017014
HLA-A	83	0.198795	83	0.156627	aa_86E	0.120902
HLA-A	83	0.0722892	83	0.0481928	aa_86L	0.309231
HLA-A	83	0.246988	83	0.23494	aa_86G	0.867431
HLA-A	83	0.114458	83	0.0963855	aa_86R	0.537157
HLA-A	83	0.813253	83	0.855422	aa_87E	0.23297
HLA-A	83	0.0722892	83	0.0481928	aa_87Q	0.309231
HLA-A	83	0.114458	83	0.0963855	aa_87N	0.537157
HLA-A	83	0.198795	83	0.156627	aa_89G	0.120902
HLA-A	83	0.801205	83	0.843373	aa_89R	0.120902
HLA-A	83	0.554217	83	0.608434	aa_90N	0.18635
HLA-A	83	0.445783	83	0.391566	aa_90K	0.18635
HLA-A	83	0.114458	83	0.126506	aa_91M	0.857236
HLA-A	83	0.885542	83	0.873494	aa_91V	0.857236
HLA-A	83	0.73494	83	0.686747	aa_94H	0.248553
HLA-A	83	0.26506	83	0.313253	aa_94Q	0.248553
HLA-A	83	0.0722892	83	0.0481928	aa_97I	0.168691
HLA-A	83	0.927711	83	0.951807	aa_97T	0.168691
HLA-A	83	0.759036	83	0.777108	aa_98D	0.87675
HLA-A	83	0.240964	83	0.222892	aa_98H	0.87675
HLA-A	83	0.271084	83	0.253012	aa_100E	0.603804
HLA-A	83	0.216867	83	0.210843	aa_100A	0.791858
HLA-A	83	0.512048	83	0.536145	aa_100V	0.49245
HLA-A	83	0.433735	83	0.403614	aa_101N	0.27491
HLA-A	83	0.0542169	83	0.060241	aa_101S	0.363712
HLA-A	83	0.512048	83	0.536145	aa_101D	0.49245
HLA-A	83	0.253012	83	0.216867	aa_103R	0.384502
HLA-A	83	0.746988	83	0.783133	aa_103G	0.384502
HLA-A	83	0.253012	83	0.216867	aa_104I	0.384502
HLA-A	83	0.746988	83	0.783133	aa_104T	0.384502
HLA-A	83	0.253012	83	0.216867	aa_105A	0.384502
HLA-A	83	0.746988	83	0.783133	aa_105L	0.384502
HLA-A	83	0.253012	83	0.216867	aa_106L	0.384502
HLA-A	83	0.746988	83	0.783133	aa_106R	0.384502
HLA-A	83	0.746988	83	0.783133	aa_107G	0.384502
HLA-A	83	0.253012	83	0.216867	aa_107R	0.384502
HLA-A	83	0.777108	83	0.746988	aa_114A	0.328395
HLA-A	83	0.222892	83	0.253012	aa_114D	0.328395
HLA-A	83	0.204819	83	0.168675	aa_119L	0.175874
HLA-A	83	0.554217	83	0.60241	aa_119I	0.223969
HLA-A	83	0.240964	83	0.228916	aa_119V	0.821537
HLA-A	83	0.289157	83	0.379518	aa_121I	0.04502
HLA-A	83	0.307229	83	0.283133	aa_121R	0.672738
HLA-A	83	0.403614	83	0.337349	aa_121M	0.14779
HLA-A	83	0.801205	83	0.843373	aa_123Y	0.139029
HLA-A	83	0.198795	83	0.156627	aa_123F	0.139029
HLA-A	83	0.283133	83	0.319277	aa_129P	0.237637
HLA-A	83	0.716867	83	0.680723	aa_129S	0.237637
HLA-A	83	0.753012	83	0.759036	aa_131G	0.907896
HLA-A	83	0.246988	83	0.240964	aa_131W	0.907896
HLA-A	83	0.0421687	83	0.060241	aa_133L	0.168534
HLA-A	83	0.957831	83	0.939759	aa_133F	0.168534
HLA-A	83	0.0421687	83	0.0421687	aa_138E	0.899822
HLA-A	83	0.463855	83	0.409639	aa_138H	0.150881
HLA-A	83	0.156627	83	0.126506	aa_138Q	0.76023
HLA-A	83	0.337349	83	0.421687	aa_138R	0.077968
HLA-A	83	0.493976	83	0.554217	aa_140D	0.125116
HLA-A	83	0.0421687	83	0.0421687	aa_140H	0.899822
HLA-A	83	0.463855	83	0.403614	aa_140Y	0.122439
HLA-A	83	0.481928	83	0.439759	aa_151K	0.242716
HLA-A	83	0.518072	83	0.560241	aa_151N	0.242716
HLA-A	83	0.716867	83	0.716867	aa_166I	0.988488
HLA-A	83	0.283133	83	0.283133	aa_166T	0.988488
HLA-A	83	0.343373	83	0.246988	aa_168Q	0.09738
HLA-A	83	0.656627	83	0.753012	aa_168K	0.09738
HLA-A	83	0.283133	83	0.283133	aa_169H	0.988488
HLA-A	83	0.716867	83	0.716867	aa_169R	0.988488
HLA-A	83	0.951807	83	0.957831	aa_173A	0.924457
HLA-A	83	0.0481928	83	0.0421687	aa_173T	0.924457
HLA-A	83	0.114458	83	0.126506	aa_174V	0.857236
HLA-A	83	0.885542	83	0.873494	aa_174A	0.857236
HLA-A	83	0.704819	83	0.807229	aa_175H	0.04108
HLA-A	83	0.295181	83	0.192771	aa_175R	0.04108
HLA-A	83	0.0180723	83	0.0301205	aa_176R	0.6968
HLA-A	83	0.0240964	83	0.0060241	aa_176W	0.200063
HLA-A	83	0.108434	83	0.156627	aa_176E	0.140656
HLA-A	83	0.174699	83	0.216867	aa_176A	0.233952
HLA-A	83	0.674699	83	0.590361	aa_176V	0.065168
HLA-A	83	0.596386	83	0.536145	aa_180L	0.36663
HLA-A	83	0.114458	83	0.126506	aa_180R	0.857236
HLA-A	83	0.0843373	83	0.10241	aa_180W	0.486117
HLA-A	83	0.204819	83	0.23494	aa_180Q	0.666942
HLA-A	83	0.114458	83	0.126506	aa_182V	0.857236
HLA-A	83	0.885542	83	0.873494	aa_182A	0.857236
HLA-A	83	0.0722892	83	0.120482	aa_185D	0.121978
HLA-A	83	0.927711	83	0.879518	aa_185E	0.121978
HLA-A	83	0.777108	83	0.746988	aa_187T	0.321222
HLA-A	83	0.222892	83	0.253012	aa_187R	0.321222
HLA-A	83	0.307229	83	0.283133	aa_190D	0.255547
HLA-A	83	0.692771	83	0.716867	aa_190E	0.255547
HLA-A	83	0.692771	83	0.716867	aa_191W	0.255547
HLA-A	83	0.307229	83	0.283133	aa_191G	0.255547
HLA-A	83	0.975904	83	0.993976	aa_195Y	0.05088
HLA-A	83	0.0240964	83	0.0060241	aa_195H	0.05088
HLA-A	83	0.560241	83	0.584337	aa_208P	0.80644
HLA-A	83	0.439759	83	0.415663	aa_208A	0.80644
HLA-A	83	0.981928	83	0.987952	aa_210K	0.573433
HLA-A	83	0.0060241	83	0.0120482	aa_210del	0.627912
HLA-A	83	0.0120482	83	0	aa_210R	0.134457
HLA-A	83	0.993976	83	0.987952	aa_211T	0.627912
HLA-A	83	0.0060241	83	0.0120482	aa_211del	0.627912
HLA-A	83	0.0060241	83	0.0120482	aa_212del	0.627912
HLA-A	83	0.993976	83	0.987952	aa_212H	0.627912
HLA-A	83	0.0060241	83	0.0120482	aa_213del	0.627912
HLA-A	83	0.993976	83	0.987952	aa_213M	0.627912
HLA-A	83	0.0060241	83	0.0120482	aa_214del	0.627912
HLA-A	83	0.993976	83	0.987952	aa_214T	0.627912
HLA-A	83	0.993976	83	0.987952	aa_215H	0.627912
HLA-A	83	0.0060241	83	0.0120482	aa_215del	0.627912
HLA-A	83	0.0060241	83	0.0120482	aa_216del	0.627912
HLA-A	83	0.993976	83	0.987952	aa_216H	0.627912
HLA-A	83	0.493976	83	0.445783	aa_217A	0.49261
HLA-A	83	0.5	83	0.542169	aa_217P	0.557793
HLA-A	83	0.0060241	83	0.0120482	aa_217del	0.627912
HLA-A	83	0.0060241	83	0.0120482	aa_218del	0.627912
HLA-A	83	0.5	83	0.542169	aa_218I	0.557793
HLA-A	83	0.493976	83	0.445783	aa_218V	0.49261
HLA-A	83	0.0060241	83	0.0120482	aa_219del	0.627912
HLA-A	83	0.993976	83	0.987952	aa_219S	0.627912
HLA-A	83	0.0060241	83	0.0120482	aa_220del	0.627912
HLA-A	83	0.993976	83	0.987952	aa_220D	0.627912
HLA-A	83	0.993976	83	0.987952	aa_221H	0.627912
HLA-A	83	0.0060241	83	0.0120482	aa_221del	0.627912
HLA-A	83	0.993976	83	0.987952	aa_222E	0.627912
HLA-A	83	0.0060241	83	0.0120482	aa_222del	0.627912
HLA-A	83	0.0060241	83	0.0120482	aa_223del	0.627912
HLA-A	83	0.993976	83	0.987952	aa_223A	0.627912
HLA-A	83	0.993976	83	0.987952	aa_224T	0.627912
HLA-A	83	0.0060241	83	0.0120482	aa_224del	0.627912
HLA-A	83	0.0060241	83	0.0120482	aa_225del	0.627912
HLA-A	83	0.993976	83	0.987952	aa_225L	0.627912
HLA-A	83	0.993976	83	0.987952	aa_226R	0.627912
HLA-A	83	0.0060241	83	0.0120482	aa_226del	0.627912
HLA-A	83	0.0060241	83	0.0120482	aa_227del	0.627912
HLA-A	83	0.993976	83	0.987952	aa_227C	0.627912
HLA-A	83	0.0060241	83	0.0120482	aa_228del	0.627912
HLA-A	83	0.993976	83	0.987952	aa_228W	0.627912
HLA-A	83	0.993976	83	0.987952	aa_229A	0.627912
HLA-A	83	0.0060241	83	0.0120482	aa_229del	0.627912
HLA-A	83	0.0060241	83	0.0120482	aa_230del	0.627912
HLA-A	83	0.993976	83	0.987952	aa_230L	0.627912
HLA-A	83	0.493976	83	0.457831	aa_231S	0.68825
HLA-A	83	0.0060241	83	0.0120482	aa_231del	0.627912
HLA-A	83	0.5	83	0.53012	aa_231G	0.761607
HLA-A	83	0.0060241	83	0.0120482	aa_232del	0.627912
HLA-A	83	0.993976	83	0.987952	aa_232F	0.627912
HLA-A	83	0.0060241	83	0.0120482	aa_233del	0.627912
HLA-A	83	0.993976	83	0.987952	aa_233Y	0.627912
HLA-A	83	0.993976	83	0.987952	aa_234P	0.627912
HLA-A	83	0.0060241	83	0.0120482	aa_234del	0.627912
HLA-A	83	0.993976	83	0.987952	aa_235A	0.627912
HLA-A	83	0.0060241	83	0.0120482	aa_235del	0.627912
HLA-A	83	0.993976	83	0.987952	aa_236E	0.627912
HLA-A	83	0.0060241	83	0.0120482	aa_236del	0.627912
HLA-A	83	0.993976	83	0.987952	aa_237I	0.627912
HLA-A	83	0.0060241	83	0.0120482	aa_237del	0.627912
HLA-A	83	0.0060241	83	0.0120482	aa_238del	0.627912
HLA-A	83	0.993976	83	0.987952	aa_238T	0.627912
HLA-A	83	0.0060241	83	0.0120482	aa_239del	0.627912
HLA-A	83	0.993976	83	0.987952	aa_239L	0.627912
HLA-A	83	0.0060241	83	0.0120482	aa_240del	0.627912
HLA-A	83	0.993976	83	0.987952	aa_240T	0.627912
HLA-A	83	0.0060241	83	0.0120482	aa_241del	0.627912
HLA-A	83	0.993976	83	0.987952	aa_241W	0.627912
HLA-A	83	0.993976	83	0.987952	aa_242Q	0.627912
HLA-A	83	0.0060241	83	0.0120482	aa_242del	0.627912
HLA-A	83	0.0060241	83	0.0120482	aa_243del	0.627912
HLA-A	83	0.993976	83	0.987952	aa_243R	0.627912
HLA-A	83	0.0060241	83	0.0120482	aa_244del	0.627912
HLA-A	83	0.993976	83	0.987952	aa_244D	0.627912
HLA-A	83	0.993976	83	0.987952	aa_245G	0.627912
HLA-A	83	0.0060241	83	0.0120482	aa_245del	0.627912
HLA-A	83	0.0060241	83	0.0120482	aa_246del	0.627912
HLA-A	83	0.993976	83	0.987952	aa_246E	0.627912
HLA-A	83	0.993976	83	0.987952	aa_247D	0.627912
HLA-A	83	0.0060241	83	0.0120482	aa_247del	0.627912
HLA-A	83	0.993976	83	0.987952	aa_248Q	0.627912
HLA-A	83	0.0060241	83	0.0120482	aa_248del	0.627912
HLA-A	83	0.993976	83	0.987952	aa_249T	0.627912
HLA-A	83	0.0060241	83	0.0120482	aa_249del	0.627912
HLA-A	83	0.0060241	83	0.0120482	aa_253del	0.627912
HLA-A	83	0.993976	83	0.987952	aa_253E	0.627912
HLA-A	83	0.0060241	83	0.0120482	aa_254del	0.627912
HLA-A	83	0.993976	83	0.987952	aa_254L	0.627912
HLA-A	83	0.0060241	83	0.0120482	aa_255del	0.627912
HLA-A	83	0.993976	83	0.987952	aa_255V	0.627912
HLA-A	83	0.993976	83	0.987952	aa_256E	0.627912
HLA-A	83	0.0060241	83	0.0120482	aa_256del	0.627912
HLA-A	83	0.993976	83	0.987952	aa_257T	0.627912
HLA-A	83	0.0060241	83	0.0120482	aa_257del	0.627912
HLA-A	83	0.993976	83	0.987952	aa_258R	0.627912
HLA-A	83	0.0060241	83	0.0120482	aa_258del	0.627912
HLA-A	83	0.0060241	83	0.0120482	aa_259del	0.627912
HLA-A	83	0.993976	83	0.987952	aa_259P	0.627912
HLA-A	83	0.0060241	83	0.0120482	aa_260del	0.627912
HLA-A	83	0.993976	83	0.987952	aa_260A	0.627912
HLA-A	83	0.0060241	83	0.0120482	aa_261del	0.627912
HLA-A	83	0.993976	83	0.987952	aa_261G	0.627912
HLA-A	83	0.0060241	83	0.0120482	aa_262del	0.627912
HLA-A	83	0.993976	83	0.987952	aa_262D	0.627912
HLA-A	83	0.0060241	83	0.0120482	aa_263del	0.627912
HLA-A	83	0.993976	83	0.987952	aa_263G	0.627912
HLA-A	83	0.993976	83	0.987952	aa_264T	0.627912
HLA-A	83	0.0060241	83	0.0120482	aa_264del	0.627912
HLA-A	83	0.993976	83	0.987952	aa_265F	0.627912
HLA-A	83	0.0060241	83	0.0120482	aa_265del	0.627912
HLA-A	83	0.0060241	83	0.0120482	aa_266del	0.627912
HLA-A	83	0.993976	83	0.987952	aa_266Q	0.627912
HLA-A	83	0.993976	83	0.987952	aa_267K	0.627912
HLA-A	83	0.0060241	83	0.0120482	aa_267del	0.627912
HLA-A	83	0.0060241	83	0.0120482	aa_268del	0.627912
HLA-A	83	0.993976	83	0.987952	aa_268W	0.627912
HLA-A	83	0.0060241	83	0.0120482	aa_269del	0.627912
HLA-A	83	0.957831	83	0.933735	aa_269A	0.496527
HLA-A	83	0.0361446	83	0.0542169	aa_269V	0.602811
HLA-A	83	0.783133	83	0.819277	aa_270A	0.55925
HLA-A	83	0.210843	83	0.168675	aa_270S	0.47791
HLA-A	83	0.0060241	83	0.0120482	aa_270del	0.627912
HLA-A	83	0.993976	83	0.987952	aa_271V	0.627912
HLA-A	83	0.0060241	83	0.0120482	aa_271del	0.627912
HLA-A	83	0.993976	83	0.987952	aa_272V	0.627912
HLA-A	83	0.0060241	83	0.0120482	aa_272del	0.627912
HLA-A	83	0.0060241	83	0.0120482	aa_273del	0.627912
HLA-A	83	0.993976	83	0.987952	aa_273V	0.627912
HLA-A	83	0.993976	83	0.987952	aa_274P	0.627912
HLA-A	83	0.0060241	83	0.0120482	aa_274del	0.627912
HLA-A	83	0.0060241	83	0.0120482	aa_275del	0.627912
HLA-A	83	0.993976	83	0.987952	aa_275S	0.627912
HLA-A	83	0.0060241	83	0.0120482	aa_276del	0.627912
HLA-A	83	0.993976	83	0.987952	aa_276G	0.627912
HLA-A	83	0.0060241	83	0.0120482	aa_277del	0.627912
HLA-A	83	0.487952	83	0.518072	aa_277E	0.778109
HLA-A	83	0.506024	83	0.46988	aa_277Q	0.70797
HLA-A	83	0.993976	83	0.987952	aa_278E	0.627912
HLA-A	83	0.0060241	83	0.0120482	aa_278del	0.627912
HLA-A	83	0.0060241	83	0.0120482	aa_279del	0.627912
HLA-A	83	0.993976	83	0.987952	aa_279Q	0.627912
HLA-A	83	0.993976	83	0.987952	aa_280R	0.627912
HLA-A	83	0.0060241	83	0.0120482	aa_280del	0.627912
HLA-A	83	0.0060241	83	0.0120482	aa_282D	0.627912
HLA-A	83	0.993976	83	0.987952	aa_282T	0.627912
HLA-A	83	0.0060241	83	0.0120482	aa_283del	0.627912
HLA-A	83	0.993976	83	0.987952	aa_283C	0.627912
HLA-A	83	0.0060241	83	0.0120482	aa_284del	0.627912
HLA-A	83	0.993976	83	0.987952	aa_284H	0.627912
HLA-A	83	0.0060241	83	0.0120482	aa_285del	0.627912
HLA-A	83	0.993976	83	0.987952	aa_285V	0.627912
HLA-A	83	0.0060241	83	0.0120482	aa_286del	0.627912
HLA-A	83	0.993976	83	0.987952	aa_286Q	0.627912
HLA-A	83	0.993976	83	0.987952	aa_287H	0.627912
HLA-A	83	0.0060241	83	0.0120482	aa_287del	0.627912
HLA-A	83	0.0060241	83	0.0120482	aa_288del	0.627912
HLA-A	83	0.993976	83	0.987952	aa_288E	0.627912
HLA-A	83	0.993976	83	0.987952	aa_289G	0.627912
HLA-A	83	0.0060241	83	0.0120482	aa_289del	0.627912
HLA-A	83	0.993976	83	0.987952	aa_290L	0.627912
HLA-A	83	0.0060241	83	0.0120482	aa_290del	0.627912
HLA-A	83	0.0060241	83	0.0120482	aa_292P	0.627912
HLA-A	83	0.993976	83	0.987952	aa_292K	0.627912
HLA-A	83	0.0060241	83	0.0120482	aa_294H	0.627912
HLA-A	83	0.993976	83	0.987952	aa_294L	0.627912
HLA-A	83	0.993976	83	0.987952	aa_295T	0.627912
HLA-A	83	0.0060241	83	0.0120482	aa_295L	0.627912
HLA-A	83	0.0060241	83	0.0120482	aa_296X	0.627912
HLA-A	83	0.993976	83	0.987952	aa_296L	0.627912
HLA-A	83	0.993976	83	0.987952	aa_297R	0.627912
HLA-A	83	0.0060241	83	0.0120482	aa_297del	0.627912
HLA-A	83	0.0060241	83	0.0120482	aa_298del	0.627912
HLA-A	83	0.993976	83	0.987952	aa_298W	0.627912
HLA-A	83	0.993976	83	0.987952	aa_299E	0.627912
HLA-A	83	0.0060241	83	0.0120482	aa_299del	0.627912
HLA-A	83	0.289157	83	0.373494	aa_300L	0.0558
HLA-A	83	0.0060241	83	0.0120482	aa_300del	0.627912
HLA-A	83	0.704819	83	0.614458	aa_300P	0.04762
HLA-A	83	0.993976	83	0.987952	aa_301S	0.627912
HLA-A	83	0.0060241	83	0.0120482	aa_301del	0.627912
HLA-A	83	0.0060241	83	0.0120482	aa_302del	0.627912
HLA-A	83	0.993976	83	0.987952	aa_302S	0.627912
HLA-A	83	0.0060241	83	0.0120482	aa_303del	0.627912
HLA-A	83	0.993976	83	0.987952	aa_303Q	0.627912
HLA-A	83	0.0060241	83	0.0120482	aa_304del	0.627912
HLA-A	83	0.993976	83	0.987952	aa_304P	0.627912
HLA-A	83	0.0060241	83	0.0120482	aa_305del	0.627912
HLA-A	83	0.993976	83	0.987952	aa_305T	0.627912
HLA-A	83	0.0060241	83	0.0120482	aa_306del	0.627912
HLA-A	83	0.795181	83	0.831325	aa_306I	0.157252
HLA-A	83	0.198795	83	0.156627	aa_306V	0.120902
HLA-A	83	0.0060241	83	0.0120482	aa_307del	0.627912
HLA-A	83	0.921687	83	0.96988	aa_307P	0.06651
HLA-A	83	0.0722892	83	0.0180723	aa_307H	0.02537
HLA-A	83	0.993976	83	0.987952	aa_308I	0.627912
HLA-A	83	0.0060241	83	0.0120482	aa_308del	0.627912
HLA-A	83	0.993976	83	0.987952	aa_309V	0.627912
HLA-A	83	0.0060241	83	0.0120482	aa_309del	0.627912
HLA-A	83	0.0060241	83	0.0120482	aa_310del	0.627912
HLA-A	83	0.993976	83	0.987952	aa_310G	0.627912
HLA-A	83	0.993976	83	0.987952	aa_311I	0.627912
HLA-A	83	0.0060241	83	0.0120482	aa_311del	0.627912
HLA-A	83	0.0060241	83	0.0120482	aa_312del	0.627912
HLA-A	83	0.993976	83	0.987952	aa_312I	0.627912
HLA-A	83	0.993976	83	0.987952	aa_313A	0.627912
HLA-A	83	0.0060241	83	0.0120482	aa_313del	0.627912
HLA-A	83	0.0060241	83	0.0120482	aa_314del	0.627912
HLA-A	83	0.993976	83	0.987952	aa_314G	0.627912
HLA-A	83	0.0060241	83	0.0120482	aa_315del	0.627912
HLA-A	83	0.993976	83	0.987952	aa_315L	0.627912
HLA-A	83	0.0060241	83	0.0120482	aa_316del	0.627912
HLA-A	83	0.993976	83	0.987952	aa_316V	0.627912
HLA-A	83	0.993976	83	0.987952	aa_317L	0.627912
HLA-A	83	0.0060241	83	0.0120482	aa_317del	0.627912
HLA-A	83	0.487952	83	0.53012	aa_318L	0.60786
HLA-A	83	0.0060241	83	0.0120482	aa_318del	0.627912
HLA-A	83	0.506024	83	0.457831	aa_318F	0.54303
HLA-A	83	0.0060241	83	0.0120482	aa_319del	0.627912
HLA-A	83	0.993976	83	0.987952	aa_319G	0.627912
HLA-A	83	0.993976	83	0.987952	aa_320A	0.627912
HLA-A	83	0.0060241	83	0.0120482	aa_320del	0.627912
HLA-A	83	0.0060241	83	0.0120482	aa_321del	0.627912
HLA-A	83	0.0421687	83	0.060241	aa_321M	0.168534
HLA-A	83	0.951807	83	0.927711	aa_321V	0.13966
HLA-A	83	0.813253	83	0.849398	aa_322I	0.46478
HLA-A	83	0.180723	83	0.138554	aa_322F	0.38417
HLA-A	83	0.0060241	83	0.0120482	aa_322del	0.627912
HLA-A	83	0.0060241	83	0.0120482	aa_323del	0.627912
HLA-A	83	0.771084	83	0.813253	aa_323T	0.52123
HLA-A	83	0.222892	83	0.174699	aa_323A	0.4428
HLA-A	83	0.0060241	83	0.0120482	aa_324del	0.627912
HLA-A	83	0.993976	83	0.987952	aa_324G	0.627912
HLA-A	83	0.993976	83	0.987952	aa_325A	0.627912
HLA-A	83	0.0060241	83	0.0120482	aa_325del	0.627912
HLA-A	83	0.0060241	83	0.0120482	aa_326del	0.627912
HLA-A	83	0.993976	83	0.987952	aa_326V	0.627912
HLA-A	83	0.0060241	83	0.0120482	aa_327del	0.627912
HLA-A	83	0.993976	83	0.987952	aa_327V	0.627912
HLA-A	83	0.993976	83	0.987952	aa_328A	0.627912
HLA-A	83	0.0060241	83	0.0120482	aa_328del	0.627912
HLA-A	83	0.993976	83	0.987952	aa_329A	0.627912
HLA-A	83	0.0060241	83	0.0120482	aa_329del	0.627912
HLA-A	83	0.993976	83	0.987952	aa_330V	0.627912
HLA-A	83	0.0060241	83	0.0120482	aa_330del	0.627912
HLA-A	83	0.819277	83	0.849398	aa_331M	0.5834
HLA-A	83	0.0060241	83	0.0120482	aa_331del	0.627912
HLA-A	83	0.174699	83	0.138554	aa_331R	0.4928
HLA-A	83	0.0060241	83	0.0120482	aa_332del	0.627912
HLA-A	83	0.993976	83	0.987952	aa_332W	0.627912
HLA-A	83	0.993976	83	0.987952	aa_333R	0.627912
HLA-A	83	0.0060241	83	0.0120482	aa_333del	0.627912
HLA-A	83	0.993976	83	0.987952	aa_334R	0.627912
HLA-A	83	0.0060241	83	0.0120482	aa_334del	0.627912
HLA-A	83	0.204819	83	0.156627	aa_335N	0.089978
HLA-A	83	0.789157	83	0.831325	aa_335K	0.118288
HLA-A	83	0.0060241	83	0.0120482	aa_335del	0.627912
HLA-A	83	0.993976	83	0.987952	aa_336S	0.627912
HLA-A	83	0.0060241	83	0.0120482	aa_336del	0.627912
HLA-A	83	0.0060241	83	0.0120482	aa_337del	0.627912
HLA-A	83	0.993976	83	0.987952	aa_337S	0.627912
HLA-A	83	0.0060241	83	0.0120482	aa_338del	0.627912
HLA-A	83	0.993976	83	0.987952	aa_338D	0.627912
HLA-A	83	0.0060241	83	0.0120482	aa_339del	0.627912
HLA-A	83	0.993976	83	0.987952	aa_339R	0.627912
HLA-A	83	0.0060241	83	0.0120482	aa_340del	0.627912
HLA-A	83	0.993976	83	0.987952	aa_340K	0.627912
HLA-A	83	0.993976	83	0.987952	aa_341G	0.627912
HLA-A	83	0.0060241	83	0.0120482	aa_341del	0.627912
HLA-A	83	0.993976	83	0.987952	aa_342G	0.627912
HLA-A	83	0.0060241	83	0.0120482	aa_342del	0.627912
HLA-A	83	0.993976	83	0.987952	aa_343S	0.627912
HLA-A	83	0.0060241	83	0.0120482	aa_343del	0.627912
HLA-A	83	0.993976	83	0.987952	aa_344Y	0.627912
HLA-A	83	0.0060241	83	0.0120482	aa_344del	0.627912
HLA-A	83	0.698795	83	0.614458	aa_345S	0.06055
HLA-A	83	0.295181	83	0.373494	aa_345T	0.07092
HLA-A	83	0.0060241	83	0.0120482	aa_345del	0.627912
HLA-A	83	0.993976	83	0.987952	aa_346Q	0.627912
HLA-A	83	0.0060241	83	0.0120482	aa_346del	0.627912
HLA-A	83	0.0060241	83	0.0120482	aa_347del	0.627912
HLA-A	83	0.993976	83	0.987952	aa_347A	0.627912
HLA-A	83	0.993976	83	0.987952	aa_348A	0.627912
HLA-A	83	0.0060241	83	0.0120482	aa_348del	0.627912
HLA-A	83	0.993976	83	0.987952	aa_349S	0.627912
HLA-A	83	0.0060241	83	0.0120482	aa_349del	0.627912
HLA-A	83	0.0060241	83	0.0120482	aa_350del	0.627912
HLA-A	83	0.993976	83	0.987952	aa_350S	0.627912
HLA-A	83	0.993976	83	0.987952	aa_351D	0.627912
HLA-A	83	0.0060241	83	0.0120482	aa_351del	0.627912
HLA-A	83	0.993976	83	0.987952	aa_352S	0.627912
HLA-A	83	0.0060241	83	0.0120482	aa_352del	0.627912
HLA-A	83	0.0060241	83	0.0120482	aa_353del	0.627912
HLA-A	83	0.993976	83	0.987952	aa_353A	0.627912
HLA-A	83	0.0060241	83	0.0120482	aa_354del	0.627912
HLA-A	83	0.993976	83	0.987952	aa_354Q	0.627912
HLA-A	83	0.0060241	83	0.0120482	aa_355del	0.627912
HLA-A	83	0.993976	83	0.987952	aa_355G	0.627912
HLA-A	83	0.993976	83	0.987952	aa_356S	0.627912
HLA-A	83	0.0060241	83	0.0120482	aa_356del	0.627912
HLA-A	83	0.993976	83	0.987952	aa_357D	0.627912
HLA-A	83	0.0060241	83	0.0120482	aa_357del	0.627912
HLA-A	83	0.210843	83	0.174699	aa_358M	0.62797
HLA-A	83	0.0060241	83	0.0120482	aa_358del	0.627912
HLA-A	83	0.783133	83	0.813253	aa_358V	0.7198
HLA-A	83	0.993976	83	0.987952	aa_359S	0.627912
HLA-A	83	0.0060241	83	0.0120482	aa_359del	0.627912
HLA-A	83	0.0060241	83	0.0120482	aa_360del	0.627912
HLA-A	83	0.993976	83	0.987952	aa_360L	0.627912
HLA-A	83	0.0060241	83	0.0120482	aa_361del	0.627912
HLA-A	83	0.993976	83	0.987952	aa_361T	0.627912
HLA-A	83	0.993976	83	0.987952	aa_362A	0.627912
HLA-A	83	0.0060241	83	0.0120482	aa_362del	0.627912
HLA-A	83	0.993976	83	0.987952	aa_363C	0.627912
HLA-A	83	0.0060241	83	0.0120482	aa_363del	0.627912
HLA-A	83	0.993976	83	0.987952	aa_364K	0.627912
HLA-A	83	0.0060241	83	0.0120482	aa_364del	0.627912
HLA-A	83	0.0060241	83	0.0120482	aa_365del	0.627912
HLA-A	83	0.993976	83	0.987952	aa_365V	0.627912
HLA-A	83	0.0060241	83	0.0120482	aa_366del	0.627912
HLA-A	83	0.993976	83	0.987952	aa_366X	0.627912
HLA-B	83	0.746988	83	0.722892	aa_2R	0.842815
HLA-B	83	0.253012	83	0.277108	aa_2L	0.842815
HLA-B	83	0.253012	83	0.277108	aa_4M	0.842815
HLA-B	83	0.746988	83	0.722892	aa_4T	0.842815
HLA-B	83	0.301205	83	0.259036	aa_9L	0.426854
HLA-B	83	0.698795	83	0.740964	aa_9V	0.426854
HLA-B	83	0.415663	83	0.433735	aa_14S	0.92331
HLA-B	83	0.584337	83	0.566265	aa_14W	0.92331
HLA-B	83	0.379518	83	0.355422	aa_15A	0.559723
HLA-B	83	0.620482	83	0.644578	aa_15G	0.559723
HLA-B	83	0.578313	83	0.554217	aa_17V	0.820358
HLA-B	83	0.421687	83	0.445783	aa_17L	0.820358
HLA-B	83	0.0722892	83	0.0722892	aa_33D	0.745633
HLA-B	83	0.246988	83	0.186747	aa_33H	0.1823
HLA-B	83	0.680723	83	0.740964	aa_33Y	0.15668
HLA-B	83	0.240964	83	0.277108	aa_35S	0.53487
HLA-B	83	0.759036	83	0.722892	aa_35A	0.53487
HLA-B	83	0.289157	83	0.313253	aa_36V	0.7598
HLA-B	83	0.710843	83	0.686747	aa_36M	0.7598
HLA-B	83	0.355422	83	0.240964	aa_48T	0.03136
HLA-B	83	0.319277	83	0.391566	aa_48S	0.31173
HLA-B	83	0.325301	83	0.36747	aa_48A	0.379595
HLA-B	83	0.0662651	83	0.060241	aa_54G	0.847451
HLA-B	83	0.933735	83	0.939759	aa_54D	0.847451
HLA-B	83	0.337349	83	0.228916	aa_56L	0.03864
HLA-B	83	0.662651	83	0.771084	aa_56Q	0.03864
HLA-B	83	0.343373	83	0.222892	aa_65T	0.02424
HLA-B	83	0.656627	83	0.777108	aa_65A	0.02424
HLA-B	83	0.26506	83	0.331325	aa_69E	0.3046
HLA-B	83	0.325301	83	0.210843	aa_69K	0.02969
HLA-B	83	0.313253	83	0.361446	aa_69T	0.303137
HLA-B	83	0.0963855	83	0.0963855	aa_69M	0.903038
HLA-B	83	0.903614	83	0.903614	aa_70E	0.903038
HLA-B	83	0.0963855	83	0.0963855	aa_70A	0.903038
HLA-B	83	0.060241	83	0.0361446	aa_86G	0.30434
HLA-B	83	0.939759	83	0.963855	aa_86R	0.30434
HLA-B	83	0.53012	83	0.596386	aa_87N	0.17244
HLA-B	83	0.46988	83	0.403614	aa_87E	0.17244
HLA-B	83	0.0722892	83	0.060241	aa_89R	0.603156
HLA-B	83	0.927711	83	0.939759	aa_89Q	0.603156
HLA-B	83	0.0722892	83	0.060241	aa_90N	0.603156
HLA-B	83	0.927711	83	0.939759	aa_90I	0.603156
HLA-B	83	0.060241	83	0.114458	aa_91Y	0.06754
HLA-B	83	0.445783	83	0.385542	aa_91S	0.267378
HLA-B	83	0.126506	83	0.120482	aa_91C	0.86647
HLA-B	83	0.295181	83	0.319277	aa_91F	0.641538
HLA-B	83	0.0722892	83	0.060241	aa_91M	0.603156
HLA-B	83	0.855422	83	0.807229	aa_93T	0.28426
HLA-B	83	0.144578	83	0.192771	aa_93A	0.28426
HLA-B	83	0.060241	83	0.114458	aa_94Q	0.06754
HLA-B	83	0.855422	83	0.807229	aa_94N	0.28426
HLA-B	83	0.0722892	83	0.060241	aa_94S	0.603156
HLA-B	83	0.0120482	83	0.0180723	aa_94K	0.79026
HLA-B	83	0.855422	83	0.807229	aa_95T	0.28426
HLA-B	83	0.144578	83	0.192771	aa_95A	0.28426
HLA-B	83	0.23494	83	0.259036	aa_98D	0.792573
HLA-B	83	0.76506	83	0.740964	aa_98Y	0.792573
HLA-B	83	0.0180723	83	0.0361446	aa_101D	0.43358
HLA-B	83	0.566265	83	0.590361	aa_101S	0.903482
HLA-B	83	0.415663	83	0.373494	aa_101N	0.70396
HLA-B	83	0.198795	83	0.168675	aa_104T	0.542102
HLA-B	83	0.23494	83	0.23494	aa_104I	0.75601
HLA-B	83	0.566265	83	0.596386	aa_104N	0.829168
HLA-B	83	0.415663	83	0.36747	aa_105A	0.63428
HLA-B	83	0.584337	83	0.63253	aa_105L	0.63428
HLA-B	83	0.566265	83	0.596386	aa_106R	0.829168
HLA-B	83	0.433735	83	0.403614	aa_106L	0.829168
HLA-B	83	0.433735	83	0.403614	aa_107R	0.829168
HLA-B	83	0.566265	83	0.596386	aa_107G	0.829168
HLA-B	83	0.626506	83	0.650602	aa_118T	0.71688
HLA-B	83	0.373494	83	0.349398	aa_118I	0.71688
HLA-B	83	0.379518	83	0.373494	aa_119I	0.928213
HLA-B	83	0.391566	83	0.445783	aa_119L	0.45937
HLA-B	83	0.228916	83	0.180723	aa_119W	0.38409
HLA-B	83	0.0120482	83	0.0180723	aa_121N	0.79026
HLA-B	83	0.162651	83	0.180723	aa_121S	0.703815
HLA-B	83	0.0421687	83	0.0301205	aa_121V	0.528403
HLA-B	83	0.120482	83	0.126506	aa_121T	0.713343
HLA-B	83	0.0481928	83	0.0542169	aa_121W	0.89789
HLA-B	83	0.614458	83	0.590361	aa_121R	0.687642
HLA-B	83	0.993976	83	1	aa_122M	0.488978
HLA-B	83	0.0060241	83	0	aa_122T	0.488978
HLA-B	83	0	83	0.0060241	aa_123F	0.523021
HLA-B	83	0.993976	83	0.96988	aa_123Y	0.19288
HLA-B	83	0.0060241	83	0.0240964	aa_123S	0.26161
HLA-B	83	0.710843	83	0.746988	aa_127V	0.472948
HLA-B	83	0.289157	83	0.253012	aa_127L	0.472948
HLA-B	83	0.96988	83	0.975904	aa_133L	0.857322
HLA-B	83	0.0301205	83	0.0240964	aa_133F	0.857322
HLA-B	83	0.662651	83	0.710843	aa_137H	0.277742
HLA-B	83	0.337349	83	0.289157	aa_137Y	0.277742
HLA-B	83	0.512048	83	0.439759	aa_138N	0.138926
HLA-B	83	0.0240964	83	0.0421687	aa_138H	0.48721
HLA-B	83	0.463855	83	0.518072	aa_138D	0.246748
HLA-B	83	0.120482	83	0.0662651	aa_140L	0.0968
HLA-B	83	0.13253	83	0.150602	aa_140F	0.899944
HLA-B	83	0.168675	83	0.162651	aa_140D	0.909665
HLA-B	83	0.246988	83	0.253012	aa_140S	0.696297
HLA-B	83	0.331325	83	0.36747	aa_140Y	0.548331
HLA-B	83	0.801205	83	0.783133	aa_155S	0.747344
HLA-B	83	0.198795	83	0.216867	aa_155R	0.747344
HLA-B	83	0.0301205	83	0.0240964	aa_167S	0.8826
HLA-B	83	0.96988	83	0.975904	aa_167T	0.8826
HLA-B	83	0.981928	83	0.987952	aa_169R	0.725039
HLA-B	83	0.0180723	83	0.0120482	aa_169L	0.725039
HLA-B	83	0.0301205	83	0.0240964	aa_171L	0.8826
HLA-B	83	0.96988	83	0.975904	aa_171W	0.8826
HLA-B	83	0.289157	83	0.361446	aa_176E	0.177374
HLA-B	83	0.710843	83	0.638554	aa_176V	0.177374
HLA-B	83	0.180723	83	0.204819	aa_180D	0.680847
HLA-B	83	0.716867	83	0.656627	aa_180L	0.28883
HLA-B	83	0.0240964	83	0.0301205	aa_180W	0.823572
HLA-B	83	0.0783133	83	0.108434	aa_180R	0.325732
HLA-B	83	0.0662651	83	0.0361446	aa_182T	0.251161
HLA-B	83	0.933735	83	0.963855	aa_182A	0.251161
HLA-B	83	0	83	0.0060241	aa_186D	0.523021
HLA-B	83	1	83	0.993976	aa_186G	0.523021
HLA-B	83	0.138554	83	0.156627	aa_187E	0.589428
HLA-B	83	0.578313	83	0.578313	aa_187L	0.894099
HLA-B	83	0.283133	83	0.26506	aa_187T	0.57677
HLA-B	83	0.807229	83	0.855422	aa_191W	0.307497
HLA-B	83	0.192771	83	0.144578	aa_191S	0.307497
HLA-B	83	0.192771	83	0.216867	aa_195H	0.510281
HLA-B	83	0.807229	83	0.783133	aa_195Y	0.510281
HLA-B	83	0.168675	83	0.210843	aa_201D	0.36689
HLA-B	83	0.831325	83	0.789157	aa_201E	0.36689
HLA-B	83	0.0783133	83	0.120482	aa_202K	0.125705
HLA-B	83	0.921687	83	0.879518	aa_202T	0.125705
HLA-B	83	0.831325	83	0.789157	aa_204Q	0.36689
HLA-B	83	0.168675	83	0.210843	aa_204E	0.36689
HLA-B	83	0.240964	83	0.289157	aa_218V	0.293232
HLA-B	83	0.759036	83	0.710843	aa_218I	0.293232
HLA-B	83	0.144578	83	0.114458	aa_223V	0.401888
HLA-B	83	0.855422	83	0.885542	aa_223A	0.401888
HLA-B	83	0.993976	83	1	aa_269A	0.264109
HLA-B	83	0.0060241	83	0	aa_269T	0.264109
HLA-B	83	0.457831	83	0.518072	aa_306I	0.289721
HLA-B	83	0.542169	83	0.481928	aa_306V	0.289721
HLA-B	83	0.548193	83	0.487952	aa_329A	0.274896
HLA-B	83	0.451807	83	0.512048	aa_329T	0.274896
HLA-B	83	0.433735	83	0.39759	aa_349C	0.533618
HLA-B	83	0.566265	83	0.60241	aa_349S	0.533618
HLA-C	83	0.987952	82	0.981707	aa_7R	0.57358
HLA-C	83	0.0120482	82	0.0182927	aa_7Q	0.57358
HLA-C	83	0.753012	82	0.719512	aa_8T	0.508656
HLA-C	83	0.246988	82	0.280488	aa_8A	0.508656
HLA-C	83	0.36747	82	0.390244	aa_10L	0.652981
HLA-C	83	0.63253	82	0.609756	aa_10I	0.652981
HLA-C	83	0.23494	82	0.262195	aa_16G	0.617589
HLA-C	83	0.76506	82	0.737805	aa_16A	0.617589
HLA-C	83	0.0120482	82	0.0182927	aa_20I	0.57358
HLA-C	83	0.987952	82	0.981707	aa_20T	0.57358
HLA-C	83	0.740964	82	0.70122	aa_25C	0.42825
HLA-C	83	0.259036	82	0.29878	aa_25G	0.42825
HLA-C	83	0.993976	82	0.981707	aa_30R	0.259509
HLA-C	83	0.0060241	82	0.0182927	aa_30K	0.259509
HLA-C	83	0.192771	82	0.213415	aa_33S	0.516265
HLA-C	83	0.475904	82	0.445122	aa_33Y	0.51315
HLA-C	83	0.325301	82	0.323171	aa_33D	0.842484
HLA-C	83	0.0060241	82	0.0182927	aa_33F	0.259509
HLA-C	83	0.801205	82	0.768293	aa_35A	0.369733
HLA-C	83	0.198795	82	0.231707	aa_35S	0.369733
HLA-C	83	0.174699	82	0.189024	aa_38W	0.60182
HLA-C	83	0.825301	82	0.810976	aa_38R	0.60182
HLA-C	83	0.915663	82	0.939024	aa_40G	0.467701
HLA-C	83	0.0843373	82	0.0609756	aa_40S	0.467701
HLA-C	83	0.198795	82	0.20122	aa_45H	0.99031
HLA-C	83	0.801205	82	0.79878	aa_45R	0.99031
HLA-C	83	0.668675	82	0.658537	aa_48A	0.9493
HLA-C	83	0.331325	82	0.341463	aa_48S	0.9493
HLA-C	83	0.138554	82	0.121951	aa_59Q	0.755415
HLA-C	83	0.861446	82	0.878049	aa_59R	0.755415
HLA-C	83	0.174699	82	0.189024	aa_73E	0.60182
HLA-C	83	0.825301	82	0.810976	aa_73A	0.60182
HLA-C	83	0.222892	82	0.20122	aa_90N	0.622383
HLA-C	83	0.777108	82	0.79878	aa_90K	0.622383
HLA-C	83	0.409639	82	0.414634	aa_97T	0.945854
HLA-C	83	0.590361	82	0.585366	aa_97A	0.945854
HLA-C	83	0.475904	82	0.481707	aa_101N	0.722067
HLA-C	83	0.524096	82	0.518293	aa_101S	0.722067
HLA-C	83	0.524096	82	0.518293	aa_104N	0.722067
HLA-C	83	0.475904	82	0.481707	aa_104K	0.722067
HLA-C	83	0.5	82	0.518293	aa_114D	0.685937
HLA-C	83	0.5	82	0.481707	aa_114A	0.685937
HLA-C	83	0.0240964	82	0.0365854	aa_115R	0.5467
HLA-C	83	0.975904	82	0.963415	aa_115G	0.5467
HLA-C	83	0.891566	82	0.859756	aa_118T	0.466736
HLA-C	83	0.108434	82	0.140244	aa_118I	0.466736
HLA-C	83	0	82	0.0121951	aa_119F	0.058118
HLA-C	83	0.885542	82	0.835366	aa_119L	0.200812
HLA-C	83	0.114458	82	0.152439	aa_119I	0.369693
HLA-C	83	0.246988	82	0.195122	aa_121W	0.177002
HLA-C	83	0.753012	82	0.804878	aa_121R	0.177002
HLA-C	83	0.0060241	82	0.0182927	aa_123C	0.259509
HLA-C	83	0.192771	82	0.22561	aa_123F	0.379103
HLA-C	83	0.0481928	82	0.097561	aa_123S	0.071072
HLA-C	83	0.753012	82	0.658537	aa_123Y	0.03457
HLA-C	83	0.927711	82	0.914634	aa_127L	0.89688
HLA-C	83	0.0722892	82	0.0853659	aa_127V	0.89688
HLA-C	83	0.963855	82	0.945122	aa_137Y	0.327011
HLA-C	83	0.0361446	82	0.054878	aa_137H	0.327011
HLA-C	83	0.325301	82	0.341463	aa_138N	0.574928
HLA-C	83	0.674699	82	0.658537	aa_138D	0.574928
HLA-C	83	0.0240964	82	0.0426829	aa_140L	0.256548
HLA-C	83	0.337349	82	0.365854	aa_140F	0.392704
HLA-C	83	0.0722892	82	0.097561	aa_140Y	0.544933
HLA-C	83	0.566265	82	0.493902	aa_140S	0.132427
HLA-C	83	0.873494	82	0.878049	aa_162T	0.945969
HLA-C	83	0.126506	82	0.121951	aa_162K	0.945969
HLA-C	83	0.0120482	82	0.0182927	aa_167S	0.57358
HLA-C	83	0.987952	82	0.981707	aa_167T	0.57358
HLA-C	83	0.753012	82	0.72561	aa_171W	0.547208
HLA-C	83	0.246988	82	0.27439	aa_171L	0.547208
HLA-C	83	0.289157	82	0.310976	aa_176A	0.705102
HLA-C	83	0.698795	82	0.689024	aa_176E	0.835499
HLA-C	83	0.0120482	82	0	aa_176T	0.230462
HLA-C	83	0.36747	82	0.402439	aa_180L	0.592305
HLA-C	83	0	82	0.0121951	aa_180D	0.058118
HLA-C	83	0.325301	82	0.359756	aa_180R	0.395198
HLA-C	83	0.253012	82	0.164634	aa_180W	0.038551
HLA-C	83	0.0542169	82	0.0609756	aa_180Q	0.898731
HLA-C	83	0.831325	82	0.841463	aa_187T	0.65007
HLA-C	83	0.0722892	82	0.0853659	aa_187L	0.89688
HLA-C	83	0.0963855	82	0.0731707	aa_187E	0.473073
HLA-C	83	0.0120482	82	0.0182927	aa_194G	0.57358
HLA-C	83	0.987952	82	0.981707	aa_194R	0.57358
HLA-C	83	0.927711	82	0.914634	aa_197E	0.89688
HLA-C	83	0.0722892	82	0.0853659	aa_197K	0.89688
HLA-C	83	0.0120482	82	0	aa_199R	0.230462
HLA-C	83	0.987952	82	1	aa_199G	0.230462
HLA-C	83	0.138554	82	0.134146	aa_201K	0.903399
HLA-C	83	0.861446	82	0.865854	aa_201E	0.903399
HLA-C	83	0.0120482	82	0	aa_207D	0.155465
HLA-C	83	0.987952	82	1	aa_207E	0.155465
HLA-C	83	0.746988	82	0.72561	aa_208H	0.658652
HLA-C	83	0.240964	82	0.256098	aa_208P	0.778467
HLA-C	83	0.0120482	82	0.0182927	aa_208R	0.57358
HLA-C	83	0.0542169	82	0.054878	aa_217L	0.933199
HLA-C	83	0.945783	82	0.945122	aa_217P	0.933199
HLA-C	83	0.759036	82	0.743902	aa_218V	0.778467
HLA-C	83	0.0060241	82	0	aa_218I	0.210665
HLA-C	83	0.23494	82	0.256098	aa_218L	0.65913
HLA-C	83	0.0843373	82	0.054878	aa_235T	0.29713
HLA-C	83	0.915663	82	0.945122	aa_235A	0.29713
HLA-C	83	0.26506	82	0.323171	aa_243W	0.270538
HLA-C	83	0.73494	82	0.676829	aa_243R	0.270538
HLA-C	83	0.0060241	82	0	aa_253Q	0.495816
HLA-C	83	0.993976	82	1	aa_253E	0.495816
HLA-C	83	0.0060241	82	0.0182927	aa_272M	0.259509
HLA-C	83	0.993976	82	0.981707	aa_272V	0.259509
HLA-C	83	0.246988	82	0.27439	aa_277Q	0.547208
HLA-C	83	0.753012	82	0.72561	aa_277E	0.547208
HLA-C	83	0.76506	82	0.743902	aa_285V	0.65913
HLA-C	83	0.23494	82	0.256098	aa_285M	0.65913
HLA-C	83	0.746988	82	0.731707	aa_291P	0.743365
HLA-C	83	0.253012	82	0.268293	aa_291Q	0.743365
HLA-C	83	0.987952	82	0.987805	aa_294L	0.955301
HLA-C	83	0.0120482	82	0.0121951	aa_294C	0.955301
HLA-C	83	0.76506	82	0.743902	aa_297R	0.65913
HLA-C	83	0.23494	82	0.256098	aa_297S	0.65913
HLA-C	83	0.674699	82	0.664634	aa_299E	0.678412
HLA-C	83	0.186747	82	0.213415	aa_299K	0.466192
HLA-C	83	0.138554	82	0.121951	aa_299G	0.755415
HLA-C	83	0.987952	82	0.981707	aa_308I	0.57358
HLA-C	83	0.0120482	82	0.0182927	aa_308N	0.57358
HLA-C	83	0.753012	82	0.72561	aa_309V	0.547208
HLA-C	83	0.0120482	82	0.0182927	aa_309L	0.57358
HLA-C	83	0.23494	82	0.256098	aa_309M	0.65913
HLA-C	83	0.987952	82	0.981707	aa_313A	0.57358
HLA-C	83	0.0120482	82	0.0182927	aa_313S	0.57358
HLA-C	83	0.987952	82	0.981707	aa_315del	0.57358
HLA-C	83	0.0120482	82	0.0182927	aa_315P	0.57358
HLA-C	83	0.987952	82	0.981707	aa_316del	0.57358
HLA-C	83	0.0120482	82	0.0182927	aa_316A	0.57358
HLA-C	83	0.987952	82	0.981707	aa_317del	0.57358
HLA-C	83	0.0120482	82	0.0182927	aa_317V	0.57358
HLA-C	83	0.987952	82	0.981707	aa_318del	0.57358
HLA-C	83	0.0120482	82	0.0182927	aa_318L	0.57358
HLA-C	83	0.987952	82	0.981707	aa_319del	0.57358
HLA-C	83	0.0120482	82	0.0182927	aa_319A	0.57358
HLA-C	83	0.0120482	82	0.0182927	aa_320V	0.57358
HLA-C	83	0.987952	82	0.981707	aa_320del	0.57358
HLA-C	83	0.23494	82	0.256098	aa_325V	0.65913
HLA-C	83	0.76506	82	0.743902	aa_325A	0.65913
HLA-C	83	0.174699	82	0.189024	aa_333M	0.60182
HLA-C	83	0.825301	82	0.810976	aa_333V	0.60182
HLA-C	83	0.656627	82	0.713415	aa_334V	0.257284
HLA-C	83	0.343373	82	0.286585	aa_334M	0.257284
HLA-C	83	0.76506	82	0.743902	aa_335A	0.65913
HLA-C	83	0.23494	82	0.256098	aa_335T	0.65913
HLA-C	83	0.246988	82	0.27439	aa_336A	0.547208
HLA-C	83	0.753012	82	0.72561	aa_336V	0.547208
HLA-C	83	0.23494	82	0.256098	aa_337M	0.65913
HLA-C	83	0.76506	82	0.743902	aa_337V	0.65913
HLA-C	83	0.987952	82	0.981707	aa_338M	0.57358
HLA-C	83	0.0120482	82	0.0182927	aa_338I	0.57358
HLA-C	83	0.0120482	82	0.0182927	aa_339H	0.57358
HLA-C	83	0.987952	82	0.981707	aa_339C	0.57358
HLA-C	83	0.0120482	82	0.00609756	aa_354V	0.589987
HLA-C	83	0.987952	82	0.993902	aa_354A	0.589987
HLA-C	83	0.76506	82	0.743902	aa_356S	0.65913
HLA-C	83	0.23494	82	0.256098	aa_356C	0.65913
HLA-C	83	0.23494	82	0.262195	aa_369T	0.589818
HLA-C	83	0.76506	82	0.737805	aa_369A	0.589818
HLA-DMA	83	0.138554	83	0.138554	aa_166I	0.977941
HLA-DMA	83	0.861446	83	0.861446	aa_166V	0.977941
HLA-DMA	83	0.0180723	83	0.0240964	aa_181A	0.539979
HLA-DMA	83	0.981928	83	0.975904	aa_181G	0.539979
HLA-DMA	83	0.0180723	83	0.0240964	aa_210H	0.539979
HLA-DMA	83	0.0301205	83	0.0180723	aa_210C	0.403921
HLA-DMA	83	0.951807	83	0.957831	aa_210R	0.84516
HLA-DMB	83	0.981928	83	0.975904	aa_28T	0.539979
HLA-DMB	83	0.0180723	83	0.0240964	aa_28A	0.539979
HLA-DMB	83	0.981928	83	0.975904	aa_49D	0.539979
HLA-DMB	83	0.0180723	83	0.0240964	aa_49V	0.539979
HLA-DMB	83	0.0180723	83	0.0240964	aa_71N	0.539979
HLA-DMB	83	0.981928	83	0.975904	aa_71S	0.539979
HLA-DMB	83	0.0180723	83	0.0481928	aa_162E	0.106507
HLA-DMB	83	0.963855	83	0.939759	aa_162A	0.262097
HLA-DMB	83	0.0180723	83	0.0120482	aa_162V	0.676847
HLA-DMB	83	0.228916	83	0.222892	aa_197T	0.754025
HLA-DMB	83	0.771084	83	0.777108	aa_197I	0.754025
HLA-DOA	83	0.0060241	83	0	aa_105C	0.197389
HLA-DOA	83	0.993976	83	1	aa_105R	0.197389
HLA-DOA	83	0.981928	83	1	aa_139F	0.128824
HLA-DOA	83	0.0180723	83	0	aa_139L	0.128824
HLA-DOA	83	1	83	0.993976	aa_175H	0.49374
HLA-DOA	83	0	83	0.0060241	aa_175R	0.49374
HLA-DOA	83	1	83	0.987952	aa_231G	0.24213
HLA-DOA	83	0	83	0.0120482	aa_231V	0.24213
HLA-DOB	83	1	83	0.993976	aa_7P	0.40933
HLA-DOB	83	0	83	0.0060241	aa_7A	0.40933
HLA-DOB	83	0.0060241	83	0.0421687	aa_18Q	0.003871
HLA-DOB	83	0.993976	83	0.957831	aa_18R	0.003871
HLA-DOB	83	0.0481928	83	0.0180723	aa_210I	0.106683
HLA-DOB	83	0.951807	83	0.981928	aa_210V	0.106683
HLA-DOB	83	0.0722892	83	0.0662651	aa_234F	0.701204
HLA-DOB	83	0.927711	83	0.933735	aa_234L	0.701204
HLA-DOB	83	0.0481928	83	0.0662651	aa_244I	0.654187
HLA-DOB	83	0.951807	83	0.933735	aa_244V	0.654187
HLA-DPA1	83	0.951807	83	0.933735	aa_42A	0.643124
HLA-DPA1	83	0.0481928	83	0.0662651	aa_42M	0.643124
HLA-DPA1	83	0.0060241	83	0	aa_59D	0.50753
HLA-DPA1	83	0.993976	83	1	aa_59E	0.50753
HLA-DPA1	83	0.198795	83	0.271084	aa_62Q	0.31287
HLA-DPA1	83	0.801205	83	0.728916	aa_62M	0.31287
HLA-DPA1	83	0.801205	83	0.728916	aa_81Q	0.31287
HLA-DPA1	83	0.198795	83	0.271084	aa_81R	0.31287
HLA-DPA1	83	1	83	0.993976	aa_89G	0.47096
HLA-DPA1	83	0	83	0.0060241	aa_89D	0.47096
HLA-DPA1	83	0.987952	83	0.993976	aa_97L	0.957516
HLA-DPA1	83	0.0120482	83	0.0060241	aa_97S	0.957516
HLA-DPA1	83	0.801205	83	0.728916	aa_114T	0.31287
HLA-DPA1	83	0.198795	83	0.271084	aa_114A	0.31287
HLA-DPA1	83	0.0060241	83	0.0060241	aa_122M	0.76795
HLA-DPA1	83	0.993976	83	0.993976	aa_122V	0.76795
HLA-DPA1	83	0.198795	83	0.271084	aa_142R	0.31287
HLA-DPA1	83	0.801205	83	0.728916	aa_142K	0.31287
HLA-DPA1	83	0.198795	83	0.271084	aa_158P	0.31287
HLA-DPA1	83	0.801205	83	0.728916	aa_158L	0.31287
HLA-DPA1	83	0.801205	83	0.728916	aa_191F	0.31287
HLA-DPA1	83	0.198795	83	0.271084	aa_191V	0.31287
HLA-DPA1	83	0.198795	83	0.271084	aa_259P	0.31287
HLA-DPA1	83	0.801205	83	0.728916	aa_259T	0.31287
HLA-DPB1	83	0.307229	83	0.313253	aa_37V	0.821238
HLA-DPB1	83	0.692771	83	0.686747	aa_37L	0.821238
HLA-DPB1	83	0.222892	83	0.222892	aa_38Y	0.690964
HLA-DPB1	83	0.0843373	83	0.0903614	aa_38H	0.8126
HLA-DPB1	83	0.692771	83	0.686747	aa_38F	0.821238
HLA-DPB1	83	0.753012	83	0.801205	aa_40G	0.207558
HLA-DPB1	83	0.246988	83	0.198795	aa_40L	0.207558
HLA-DPB1	83	0.96988	83	0.993976	aa_62E	0.076582
HLA-DPB1	83	0.0301205	83	0.0060241	aa_62Q	0.076582
HLA-DPB1	83	0.86747	83	0.837349	aa_64F	0.845471
HLA-DPB1	83	0.0361446	83	0.0060241	aa_64L	0.030193
HLA-DPB1	83	0.0963855	83	0.156627	aa_64Y	0.28123
HLA-DPB1	83	0.608434	83	0.481928	aa_65V	0.05443
HLA-DPB1	83	0.391566	83	0.518072	aa_65A	0.05443
HLA-DPB1	83	0.0421687	83	0.0060241	aa_84E	0.01186
HLA-DPB1	83	0.403614	83	0.53012	aa_84A	0.05303
HLA-DPB1	83	0.554217	83	0.463855	aa_84D	0.23234
HLA-DPB1	83	0.445783	83	0.536145	aa_85A	0.23234
HLA-DPB1	83	0.554217	83	0.463855	aa_85E	0.23234
HLA-DPB1	83	0.192771	83	0.13253	aa_86D	0.13932
HLA-DPB1	83	0.807229	83	0.86747	aa_86E	0.13932
HLA-DPB1	83	0.795181	83	0.89759	aa_94I	0.005285
HLA-DPB1	83	0.204819	83	0.10241	aa_94L	0.005285
HLA-DPB1	83	0.271084	83	0.319277	aa_98E	0.317049
HLA-DPB1	83	0.0301205	83	0.0060241	aa_98R	0.076582
HLA-DPB1	83	0.698795	83	0.674699	aa_98K	0.624223
HLA-DPB1	83	0.204819	83	0.23494	aa_105V	0.823777
HLA-DPB1	83	0.0301205	83	0.0361446	aa_105I	0.991424
HLA-DPB1	83	0.76506	83	0.728916	aa_105M	0.826943
HLA-DPB1	83	0.650602	83	0.686747	aa_113G	0.1935
HLA-DPB1	83	0.331325	83	0.313253	aa_113D	0.342317
HLA-DPB1	83	0.0180723	83	0	aa_113V	0.11141
HLA-DPB1	83	0.668675	83	0.686747	aa_114G	0.342317
HLA-DPB1	83	0.331325	83	0.313253	aa_114E	0.342317
HLA-DPB1	83	0.331325	83	0.313253	aa_115A	0.342317
HLA-DPB1	83	0.668675	83	0.686747	aa_115P	0.342317
HLA-DPB1	83	0.331325	83	0.313253	aa_116V	0.342317
HLA-DPB1	83	0.668675	83	0.686747	aa_116M	0.342317
HLA-DPB1	83	0.686747	83	0.722892	aa_125R	0.134153
HLA-DPB1	83	0.313253	83	0.277108	aa_125K	0.134153
HLA-DPB1	83	0.674699	83	0.716867	aa_199T	0.12499
HLA-DPB1	83	0.325301	83	0.283133	aa_199I	0.12499
HLA-DPB1	83	0.837349	83	0.909639	aa_207L	0.099917
HLA-DPB1	83	0.162651	83	0.0903614	aa_207M	0.099917
HLA-DPB1	83	0.0421687	83	0.120482	aa_223Q	0.037599
HLA-DPB1	83	0	83	0.0060241	aa_223W	0.175569
HLA-DPB1	83	0.957831	83	0.873494	aa_223R	0.020854
HLA-DPB1	83	0.0662651	83	0.0180723	aa_234M	0.027547
HLA-DPB1	83	0.933735	83	0.981928	aa_234V	0.027547
HLA-DPB1	83	0.0180723	83	0	aa_244T	0.11141
HLA-DPB1	83	0.981928	83	1	aa_244I	0.11141
HLA-DRA	83	0.993976	83	0.987952	aa_16V	0.355412
HLA-DRA	83	0.0060241	83	0.0120482	aa_16L	0.355412
HLA-DRA	83	0.301205	83	0.313253	aa_242L	0.832447
HLA-DRA	83	0.698795	83	0.686747	aa_242V	0.832447
HLA-DRB1	83	0.487952	83	0.487952	aa_5K	0.608357
HLA-DRB1	83	0.512048	83	0.512048	aa_5R	0.608357
HLA-DRB1	83	0.120482	83	0.138554	aa_6F	0.344303
HLA-DRB1	83	0.879518	83	0.861446	aa_6L	0.344303
HLA-DRB1	83	0.813253	83	0.771084	aa_13A	0.76517
HLA-DRB1	83	0.186747	83	0.228916	aa_13T	0.76517
HLA-DRB1	83	0.512048	83	0.512048	aa_14V	0.608357
HLA-DRB1	83	0.487952	83	0.487952	aa_14A	0.608357
HLA-DRB1	83	0.921687	83	0.915663	aa_29A	0.803677
HLA-DRB1	83	0.0783133	83	0.0843373	aa_29S	0.803677
HLA-DRB1	83	0.819277	83	0.879518	aa_33R	0.046851
HLA-DRB1	83	0.180723	83	0.120482	aa_33Q	0.046851
HLA-DRB1	83	0.626506	83	0.650602	aa_39E	0.141525
HLA-DRB1	83	0.0120482	83	0.0240964	aa_39K	0.92979
HLA-DRB1	83	0.0060241	83	0	aa_39del	0.216626
HLA-DRB1	83	0.355422	83	0.325301	aa_39W	0.185973
HLA-DRB1	83	0.0060241	83	0	aa_40del	0.216626
HLA-DRB1	83	0.487952	83	0.487952	aa_40Q	0.608357
HLA-DRB1	83	0.0060241	83	0.0240964	aa_40E	0.193752
HLA-DRB1	83	0.5	83	0.487952	aa_40Y	0.752863
HLA-DRB1	83	0.126506	83	0.162651	aa_41V	0.181823
HLA-DRB1	83	0.5	83	0.487952	aa_41S	0.752863
HLA-DRB1	83	0.10241	83	0.10241	aa_41P	0.960775
HLA-DRB1	83	0.0060241	83	0	aa_41del	0.216626
HLA-DRB1	83	0.168675	83	0.0963855	aa_41G	0.036357
HLA-DRB1	83	0.0843373	83	0.126506	aa_41L	0.74127
HLA-DRB1	83	0.0120482	83	0.0240964	aa_41D	0.92979
HLA-DRB1	83	0.493976	83	0.512048	aa_42K	0.862336
HLA-DRB1	83	0.5	83	0.487952	aa_42T	0.752863
HLA-DRB1	83	0.0060241	83	0	aa_42del	0.216626
HLA-DRB1	83	0.451807	83	0.427711	aa_43S	0.750237
HLA-DRB1	83	0.168675	83	0.0963855	aa_43Y	0.036357
HLA-DRB1	83	0.120482	83	0.138554	aa_43H	0.344303
HLA-DRB1	83	0.10241	83	0.174699	aa_43F	0.42069
HLA-DRB1	83	0.0060241	83	0	aa_43del	0.216626
HLA-DRB1	83	0.0481928	83	0.060241	aa_43G	0.996419
HLA-DRB1	83	0.10241	83	0.10241	aa_43R	0.960775
HLA-DRB1	83	0.168675	83	0.0963855	aa_44K	0.036357
HLA-DRB1	83	0.0060241	83	0	aa_44del	0.216626
HLA-DRB1	83	0.825301	83	0.903614	aa_44E	0.0221
HLA-DRB1	83	0.0060241	83	0	aa_45del	0.216626
HLA-DRB1	83	0.993976	83	1	aa_45C	0.216626
HLA-DRB1	83	0.945783	83	0.939759	aa_46H	0.776569
HLA-DRB1	83	0.0481928	83	0.060241	aa_46Y	0.996419
HLA-DRB1	83	0.0060241	83	0	aa_46del	0.216626
HLA-DRB1	83	0.0060241	83	0	aa_47del	0.216626
HLA-DRB1	83	0.993976	83	1	aa_47F	0.216626
HLA-DRB1	83	0.993976	83	1	aa_48F	0.216626
HLA-DRB1	83	0.0060241	83	0	aa_48del	0.216626
HLA-DRB1	83	0.993976	83	1	aa_49N	0.216626
HLA-DRB1	83	0.0060241	83	0	aa_49del	0.216626
HLA-DRB1	83	0.993976	83	1	aa_50G	0.216626
HLA-DRB1	83	0.0060241	83	0	aa_50del	0.216626
HLA-DRB1	83	0.993976	83	1	aa_51T	0.216626
HLA-DRB1	83	0.0060241	83	0	aa_51del	0.216626
HLA-DRB1	83	0.0060241	83	0	aa_52G	0.216626
HLA-DRB1	83	0.993976	83	1	aa_52E	0.216626
HLA-DRB1	83	0.993976	83	1	aa_54V	0.216626
HLA-DRB1	83	0.0060241	83	0	aa_54L	0.216626
HLA-DRB1	83	0.831325	83	0.903614	aa_55R	0.036357
HLA-DRB1	83	0.168675	83	0.0963855	aa_55Q	0.036357
HLA-DRB1	83	0.10241	83	0.156627	aa_56Y	0.32752
HLA-DRB1	83	0.0963855	83	0.162651	aa_56L	0.3601
HLA-DRB1	83	0.801205	83	0.680723	aa_56F	0.14437
HLA-DRB1	83	0.0060241	83	0	aa_57del	0.216626
HLA-DRB1	83	0.993976	83	1	aa_57L	0.216626
HLA-DRB1	83	0.0060241	83	0	aa_58del	0.216626
HLA-DRB1	83	0.692771	83	0.710843	aa_58D	0.16562
HLA-DRB1	83	0.0120482	83	0.0240964	aa_58H	0.92979
HLA-DRB1	83	0.289157	83	0.26506	aa_58E	0.2151
HLA-DRB1	83	0.0060241	83	0	aa_59del	0.216626
HLA-DRB1	83	0.993976	83	1	aa_59R	0.216626
HLA-DRB1	83	0.716867	83	0.704819	aa_60Y	0.450218
HLA-DRB1	83	0.0060241	83	0.0240964	aa_60H	0.225613
HLA-DRB1	83	0.0120482	83	0.0240964	aa_60G	0.92979
HLA-DRB1	83	0.0060241	83	0	aa_60del	0.216626
HLA-DRB1	83	0.168675	83	0.0963855	aa_60L	0.036357
HLA-DRB1	83	0.0843373	83	0.126506	aa_60C	0.74127
HLA-DRB1	83	0.0060241	83	0.0240964	aa_60R	0.193752
HLA-DRB1	83	0.891566	83	0.825301	aa_61F	0.54771
HLA-DRB1	83	0.0060241	83	0	aa_61del	0.216626
HLA-DRB1	83	0.0060241	83	0.0240964	aa_61V	0.193752
HLA-DRB1	83	0.0963855	83	0.150602	aa_61I	0.72129
HLA-DRB1	83	0.271084	83	0.325301	aa_62H	0.272224
HLA-DRB1	83	0.722892	83	0.674699	aa_62Y	0.344717
HLA-DRB1	83	0.0060241	83	0	aa_62del	0.216626
HLA-DRB1	83	0.0060241	83	0	aa_63del	0.216626
HLA-DRB1	83	0.120482	83	0.138554	aa_63H	0.344303
HLA-DRB1	83	0.873494	83	0.861446	aa_63N	0.458461
HLA-DRB1	83	0.0060241	83	0	aa_64del	0.216626
HLA-DRB1	83	0.993976	83	1	aa_64Q	0.216626
HLA-DRB1	83	0.993976	83	1	aa_65E	0.216626
HLA-DRB1	83	0.0060241	83	0	aa_65del	0.216626
HLA-DRB1	83	0.993976	83	1	aa_66E	0.216626
HLA-DRB1	83	0.0060241	83	0	aa_66del	0.216626
HLA-DRB1	83	0.216867	83	0.13253	aa_67F	0.043784
HLA-DRB1	83	0	83	0.0120482	aa_67L	0.13385
HLA-DRB1	83	0.0060241	83	0	aa_67del	0.216626
HLA-DRB1	83	0.355422	83	0.349398	aa_67Y	0.478111
HLA-DRB1	83	0.228916	83	0.277108	aa_67N	0.52509
HLA-DRB1	83	0.192771	83	0.228916	aa_67S	0.8392
HLA-DRB1	83	0	83	0.0120482	aa_68L	0.13385
HLA-DRB1	83	0.0060241	83	0	aa_68del	0.216626
HLA-DRB1	83	0.987952	83	0.963855	aa_68V	0.17277
HLA-DRB1	83	0.0060241	83	0.0240964	aa_68A	0.193752
HLA-DRB1	83	0.993976	83	1	aa_69R	0.216626
HLA-DRB1	83	0.0060241	83	0	aa_69del	0.216626
HLA-DRB1	83	0.0060241	83	0.0240964	aa_70Y	0.193752
HLA-DRB1	83	0.987952	83	0.975904	aa_70F	0.49448
HLA-DRB1	83	0.0060241	83	0	aa_70del	0.216626
HLA-DRB1	83	0.993976	83	1	aa_71D	0.216626
HLA-DRB1	83	0.0060241	83	0	aa_71del	0.216626
HLA-DRB1	83	0.0060241	83	0	aa_72del	0.216626
HLA-DRB1	83	0.993976	83	1	aa_72S	0.216626
HLA-DRB1	83	0.0060241	83	0	aa_73del	0.216626
HLA-DRB1	83	0.993976	83	1	aa_73D	0.216626
HLA-DRB1	83	0.993976	83	1	aa_74V	0.216626
HLA-DRB1	83	0.0060241	83	0	aa_74del	0.216626
HLA-DRB1	83	0.993976	83	1	aa_75G	0.216626
HLA-DRB1	83	0.0060241	83	0	aa_75del	0.216626
HLA-DRB1	83	0.993976	83	1	aa_76E	0.216626
HLA-DRB1	83	0.0060241	83	0	aa_76del	0.216626
HLA-DRB1	83	0.548193	83	0.542169	aa_77Y	0.557139
HLA-DRB1	83	0.445783	83	0.457831	aa_77F	0.472427
HLA-DRB1	83	0.0060241	83	0	aa_77del	0.216626
HLA-DRB1	83	0.0060241	83	0	aa_78S	0.216626
HLA-DRB1	83	0.993976	83	1	aa_78R	0.216626
HLA-DRB1	83	0.993976	83	1	aa_79A	0.216626
HLA-DRB1	83	0.0060241	83	0	aa_79V	0.216626
HLA-DRB1	83	0.0060241	83	0	aa_80I	0.216626
HLA-DRB1	83	0.993976	83	1	aa_80V	0.216626
HLA-DRB1	83	0.993976	83	1	aa_81T	0.216626
HLA-DRB1	83	0.0060241	83	0	aa_81S	0.216626
HLA-DRB1	83	0.993976	83	1	aa_82E	0.216626
HLA-DRB1	83	0.0060241	83	0	aa_82S	0.216626
HLA-DRB1	83	0.0060241	83	0	aa_83M	0.216626
HLA-DRB1	83	0.993976	83	1	aa_83L	0.216626
HLA-DRB1	83	0.0060241	83	0	aa_86S	0.216626
HLA-DRB1	83	0.993976	83	1	aa_86P	0.216626
HLA-DRB1	83	0.186747	83	0.13253	aa_87V	0.09151
HLA-DRB1	83	0.0481928	83	0.0361446	aa_87A	0.78509
HLA-DRB1	83	0.0783133	83	0.0662651	aa_87S	0.843897
HLA-DRB1	83	0.680723	83	0.76506	aa_87D	0.079055
HLA-DRB1	83	0.0060241	83	0	aa_87G	0.216626
HLA-DRB1	83	0.0060241	83	0	aa_88C	0.216626
HLA-DRB1	83	0.813253	83	0.885542	aa_88A	0.272
HLA-DRB1	83	0.180723	83	0.114458	aa_88E	0.3605
HLA-DRB1	83	0.993976	83	1	aa_89E	0.216626
HLA-DRB1	83	0.0060241	83	0	aa_89G	0.216626
HLA-DRB1	83	0.0060241	83	0	aa_90T	0.216626
HLA-DRB1	83	0.76506	83	0.831325	aa_90Y	0.082548
HLA-DRB1	83	0.0481928	83	0.0361446	aa_90H	0.78509
HLA-DRB1	83	0.180723	83	0.13253	aa_90S	0.112227
HLA-DRB1	83	0.993976	83	1	aa_92N	0.216626
HLA-DRB1	83	0.0060241	83	0	aa_92T	0.216626
HLA-DRB1	83	0.0060241	83	0	aa_93del	0.216626
HLA-DRB1	83	0.993976	83	1	aa_93S	0.216626
HLA-DRB1	83	0.993976	83	1	aa_94Q	0.216626
HLA-DRB1	83	0.0060241	83	0	aa_94del	0.216626
HLA-DRB1	83	0.0060241	83	0	aa_95del	0.216626
HLA-DRB1	83	0.993976	83	1	aa_95K	0.216626
HLA-DRB1	83	0.0060241	83	0	aa_96del	0.216626
HLA-DRB1	83	0.993976	83	1	aa_96D	0.216626
HLA-DRB1	83	0.246988	83	0.204819	aa_97F	0.455972
HLA-DRB1	83	0.0060241	83	0	aa_97del	0.216626
HLA-DRB1	83	0.343373	83	0.457831	aa_97L	0.083082
HLA-DRB1	83	0.403614	83	0.337349	aa_97I	0.325506
HLA-DRB1	83	0.0060241	83	0	aa_98del	0.216626
HLA-DRB1	83	0.993976	83	1	aa_98L	0.216626
HLA-DRB1	83	0.0060241	83	0	aa_99del	0.216626
HLA-DRB1	83	0.993976	83	1	aa_99E	0.216626
HLA-DRB1	83	0.361446	83	0.475904	aa_100Q	0.09235
HLA-DRB1	83	0.566265	83	0.439759	aa_100D	0.0867
HLA-DRB1	83	0.0060241	83	0	aa_100del	0.216626
HLA-DRB1	83	0.0662651	83	0.0843373	aa_100R	0.684558
HLA-DRB1	83	0.150602	83	0.13253	aa_101E	0.694026
HLA-DRB1	83	0.0783133	83	0.0843373	aa_101A	0.803677
HLA-DRB1	83	0.656627	83	0.572289	aa_101R	0.068974
HLA-DRB1	83	0.108434	83	0.210843	aa_101K	0.004449
HLA-DRB1	83	0.0060241	83	0	aa_101del	0.216626
HLA-DRB1	83	0.993976	83	1	aa_102R	0.216626
HLA-DRB1	83	0.0060241	83	0	aa_102del	0.216626
HLA-DRB1	83	0.0060241	83	0	aa_103del	0.216626
HLA-DRB1	83	0.271084	83	0.23494	aa_103G	0.357288
HLA-DRB1	83	0.722892	83	0.76506	aa_103A	0.284714
HLA-DRB1	83	0.0963855	83	0.138554	aa_104R	0.307
HLA-DRB1	83	0.0060241	83	0	aa_104del	0.216626
HLA-DRB1	83	0.0481928	83	0.0481928	aa_104L	0.597937
HLA-DRB1	83	0.0903614	83	0.10241	aa_104E	0.800733
HLA-DRB1	83	0.174699	83	0.0963855	aa_104Q	0.026136
HLA-DRB1	83	0.584337	83	0.614458	aa_104A	0.299753
HLA-DRB1	83	0.0060241	83	0	aa_105del	0.216626
HLA-DRB1	83	0.993976	83	1	aa_105V	0.216626
HLA-DRB1	83	0.0963855	83	0.138554	aa_107N	0.307
HLA-DRB1	83	0.903614	83	0.861446	aa_107T	0.307
HLA-DRB1	83	0.0060241	83	0	aa_108del	0.216626
HLA-DRB1	83	0.807229	83	0.879518	aa_108Y	0.0208
HLA-DRB1	83	0.186747	83	0.120482	aa_108V	0.033791
HLA-DRB1	83	0.0060241	83	0	aa_109del	0.216626
HLA-DRB1	83	0.993976	83	1	aa_109C	0.216626
HLA-DRB1	83	0.0060241	83	0	aa_110del	0.216626
HLA-DRB1	83	0.993976	83	1	aa_110R	0.216626
HLA-DRB1	83	0.993976	83	1	aa_111H	0.216626
HLA-DRB1	83	0.0060241	83	0	aa_111del	0.216626
HLA-DRB1	83	0.0060241	83	0	aa_112del	0.216626
HLA-DRB1	83	0.993976	83	1	aa_112N	0.216626
HLA-DRB1	83	0.993976	83	1	aa_113Y	0.216626
HLA-DRB1	83	0.0060241	83	0	aa_113del	0.216626
HLA-DRB1	83	0.993976	83	1	aa_114G	0.216626
HLA-DRB1	83	0.0060241	83	0	aa_114del	0.216626
HLA-DRB1	83	0.0542169	83	0.060241	aa_115A	0.88894
HLA-DRB1	83	0.939759	83	0.939759	aa_115V	0.667515
HLA-DRB1	83	0.0060241	83	0	aa_115del	0.216626
HLA-DRB1	83	0.493976	83	0.481928	aa_116V	0.888688
HLA-DRB1	83	0.0060241	83	0	aa_116del	0.216626
HLA-DRB1	83	0.5	83	0.518072	aa_116G	0.779969
HLA-DRB1	83	0.0060241	83	0	aa_117del	0.216626
HLA-DRB1	83	0.993976	83	1	aa_117E	0.216626
HLA-DRB1	83	0.0060241	83	0	aa_118del	0.216626
HLA-DRB1	83	0.993976	83	1	aa_118S	0.216626
HLA-DRB1	83	0.993976	83	1	aa_119F	0.216626
HLA-DRB1	83	0.0060241	83	0	aa_119del	0.216626
HLA-DRB1	83	0.993976	83	1	aa_120T	0.216626
HLA-DRB1	83	0.0060241	83	0	aa_120S	0.216626
HLA-DRB1	83	0.993976	83	1	aa_121V	0.216626
HLA-DRB1	83	0.0060241	83	0	aa_121I	0.216626
HLA-DRB1	83	0.0060241	83	0	aa_122T	0.216626
HLA-DRB1	83	0.993976	83	1	aa_122Q	0.216626
HLA-DRB1	83	0.0060241	83	0	aa_125del	0.216626
HLA-DRB1	83	0.993976	83	1	aa_125V	0.216626
HLA-DRB1	83	0.0060241	83	0	aa_126del	0.216626
HLA-DRB1	83	0.108434	83	0.126506	aa_126Q	0.572413
HLA-DRB1	83	0.120482	83	0.138554	aa_126Y	0.344303
HLA-DRB1	83	0.0843373	83	0.126506	aa_126E	0.74127
HLA-DRB1	83	0.680723	83	0.608434	aa_126H	0.27049
HLA-DRB1	83	0.993976	83	1	aa_127P	0.216626
HLA-DRB1	83	0.0060241	83	0	aa_127del	0.216626
HLA-DRB1	83	0.0060241	83	0	aa_128del	0.216626
HLA-DRB1	83	0.692771	83	0.73494	aa_128K	0.409263
HLA-DRB1	83	0.301205	83	0.26506	aa_128E	0.498885
HLA-DRB1	83	0.0060241	83	0	aa_129del	0.216626
HLA-DRB1	83	0.993976	83	1	aa_129V	0.216626
HLA-DRB1	83	0.0060241	83	0	aa_130del	0.216626
HLA-DRB1	83	0.993976	83	1	aa_130T	0.216626
HLA-DRB1	83	0.993976	83	1	aa_131V	0.216626
HLA-DRB1	83	0.0060241	83	0	aa_131del	0.216626
HLA-DRB1	83	0.0060241	83	0	aa_132del	0.216626
HLA-DRB1	83	0.993976	83	1	aa_132Y	0.216626
HLA-DRB1	83	0.993976	83	1	aa_133P	0.216626
HLA-DRB1	83	0.0060241	83	0	aa_133del	0.216626
HLA-DRB1	83	0.692771	83	0.740964	aa_134S	0.347049
HLA-DRB1	83	0.301205	83	0.259036	aa_134A	0.429945
HLA-DRB1	83	0.0060241	83	0	aa_134del	0.216626
HLA-DRB1	83	0.0060241	83	0	aa_135del	0.216626
HLA-DRB1	83	0.993976	83	1	aa_135K	0.216626
HLA-DRB1	83	0.993976	83	1	aa_136T	0.216626
HLA-DRB1	83	0.0060241	83	0	aa_136del	0.216626
HLA-DRB1	83	0.0060241	83	0	aa_137del	0.216626
HLA-DRB1	83	0.993976	83	1	aa_137Q	0.216626
HLA-DRB1	83	0.0060241	83	0	aa_138del	0.216626
HLA-DRB1	83	0.993976	83	1	aa_138P	0.216626
HLA-DRB1	83	0.0060241	83	0	aa_139del	0.216626
HLA-DRB1	83	0.993976	83	1	aa_139L	0.216626
HLA-DRB1	83	0.993976	83	1	aa_140Q	0.216626
HLA-DRB1	83	0.0060241	83	0	aa_140del	0.216626
HLA-DRB1	83	0.993976	83	1	aa_141H	0.216626
HLA-DRB1	83	0.0060241	83	0	aa_141del	0.216626
HLA-DRB1	83	0.0060241	83	0	aa_142Y	0.50173
HLA-DRB1	83	0.987952	83	1	aa_142H	0.17804
HLA-DRB1	83	0.0060241	83	0	aa_142del	0.216626
HLA-DRB1	83	0.993976	83	1	aa_143N	0.216626
HLA-DRB1	83	0.0060241	83	0	aa_143del	0.216626
HLA-DRB1	83	0.0060241	83	0	aa_144del	0.216626
HLA-DRB1	83	0.993976	83	1	aa_144L	0.216626
HLA-DRB1	83	0.0060241	83	0	aa_145del	0.216626
HLA-DRB1	83	0.993976	83	1	aa_145L	0.216626
HLA-DRB1	83	0.993976	83	1	aa_146V	0.216626
HLA-DRB1	83	0.0060241	83	0	aa_146del	0.216626
HLA-DRB1	83	0.993976	83	1	aa_147C	0.216626
HLA-DRB1	83	0.0060241	83	0	aa_147del	0.216626
HLA-DRB1	83	0.0060241	83	0	aa_148del	0.216626
HLA-DRB1	83	0.993976	83	1	aa_148S	0.216626
HLA-DRB1	83	0.0060241	83	0	aa_149del	0.216626
HLA-DRB1	83	0.993976	83	1	aa_149V	0.216626
HLA-DRB1	83	0.86747	83	0.837349	aa_150S	0.254375
HLA-DRB1	83	0.126506	83	0.162651	aa_150N	0.181823
HLA-DRB1	83	0.0060241	83	0	aa_150del	0.216626
HLA-DRB1	83	0.993976	83	1	aa_151G	0.216626
HLA-DRB1	83	0.0060241	83	0	aa_151del	0.216626
HLA-DRB1	83	0.993976	83	1	aa_152F	0.216626
HLA-DRB1	83	0.0060241	83	0	aa_152del	0.216626
HLA-DRB1	83	0.993976	83	1	aa_153Y	0.216626
HLA-DRB1	83	0.0060241	83	0	aa_153del	0.216626
HLA-DRB1	83	0.993976	83	1	aa_154P	0.216626
HLA-DRB1	83	0.0060241	83	0	aa_154del	0.216626
HLA-DRB1	83	0.993976	83	1	aa_155G	0.216626
HLA-DRB1	83	0.0060241	83	0	aa_155del	0.216626
HLA-DRB1	83	0.993976	83	1	aa_156S	0.216626
HLA-DRB1	83	0.0060241	83	0	aa_156del	0.216626
HLA-DRB1	83	0.993976	83	1	aa_157I	0.216626
HLA-DRB1	83	0.0060241	83	0	aa_157del	0.216626
HLA-DRB1	83	0.0060241	83	0	aa_158del	0.216626
HLA-DRB1	83	0.993976	83	1	aa_158E	0.216626
HLA-DRB1	83	0.993976	83	1	aa_159V	0.216626
HLA-DRB1	83	0.0060241	83	0	aa_159del	0.216626
HLA-DRB1	83	0.993976	83	1	aa_160R	0.216626
HLA-DRB1	83	0.0060241	83	0	aa_160del	0.216626
HLA-DRB1	83	0.993976	83	1	aa_161W	0.216626
HLA-DRB1	83	0.0060241	83	0	aa_161del	0.216626
HLA-DRB1	83	0.993976	83	1	aa_162F	0.216626
HLA-DRB1	83	0.0060241	83	0	aa_162del	0.216626
HLA-DRB1	83	0.10241	83	0.10241	aa_163L	0.960775
HLA-DRB1	83	0.0060241	83	0	aa_163del	0.216626
HLA-DRB1	83	0.891566	83	0.89759	aa_163R	0.861837
HLA-DRB1	83	0.993976	83	1	aa_164N	0.216626
HLA-DRB1	83	0.0060241	83	0	aa_164del	0.216626
HLA-DRB1	83	0.0060241	83	0	aa_165del	0.216626
HLA-DRB1	83	0.993976	83	1	aa_165G	0.216626
HLA-DRB1	83	0.0060241	83	0	aa_166del	0.216626
HLA-DRB1	83	0.993976	83	1	aa_166Q	0.216626
HLA-DRB1	83	0.993976	83	1	aa_167E	0.216626
HLA-DRB1	83	0.0060241	83	0	aa_167del	0.216626
HLA-DRB1	83	0.993976	83	1	aa_168E	0.216626
HLA-DRB1	83	0.0060241	83	0	aa_168del	0.216626
HLA-DRB1	83	0.993976	83	1	aa_169K	0.216626
HLA-DRB1	83	0.0060241	83	0	aa_169del	0.216626
HLA-DRB1	83	0.626506	83	0.650602	aa_170T	0.141525
HLA-DRB1	83	0.0060241	83	0	aa_170del	0.216626
HLA-DRB1	83	0.36747	83	0.349398	aa_170A	0.184546
HLA-DRB1	83	0.993976	83	1	aa_171G	0.216626
HLA-DRB1	83	0.0060241	83	0	aa_171del	0.216626
HLA-DRB1	83	0.0060241	83	0	aa_172del	0.216626
HLA-DRB1	83	0.10241	83	0.10241	aa_172M	0.960775
HLA-DRB1	83	0.891566	83	0.89759	aa_172V	0.861837
HLA-DRB1	83	0.993976	83	1	aa_173V	0.216626
HLA-DRB1	83	0.0060241	83	0	aa_173del	0.216626
HLA-DRB1	83	0.993976	83	1	aa_174S	0.216626
HLA-DRB1	83	0.0060241	83	0	aa_174del	0.216626
HLA-DRB1	83	0.0060241	83	0	aa_175del	0.216626
HLA-DRB1	83	0.993976	83	1	aa_175T	0.216626
HLA-DRB1	83	0.993976	83	1	aa_176G	0.216626
HLA-DRB1	83	0.0060241	83	0	aa_176del	0.216626
HLA-DRB1	83	0.993976	83	1	aa_177L	0.216626
HLA-DRB1	83	0.0060241	83	0	aa_177del	0.216626
HLA-DRB1	83	0.993976	83	1	aa_178I	0.216626
HLA-DRB1	83	0.0060241	83	0	aa_178del	0.216626
HLA-DRB1	83	0.493976	83	0.512048	aa_179Q	0.862336
HLA-DRB1	83	0.5	83	0.487952	aa_179H	0.752863
HLA-DRB1	83	0.0060241	83	0	aa_179del	0.216626
HLA-DRB1	83	0.0060241	83	0	aa_180del	0.216626
HLA-DRB1	83	0.993976	83	1	aa_180N	0.216626
HLA-DRB1	83	0.0060241	83	0	aa_181del	0.216626
HLA-DRB1	83	0.993976	83	1	aa_181G	0.216626
HLA-DRB1	83	0.993976	83	1	aa_182D	0.216626
HLA-DRB1	83	0.0060241	83	0	aa_182del	0.216626
HLA-DRB1	83	0.993976	83	1	aa_183W	0.216626
HLA-DRB1	83	0.0060241	83	0	aa_183del	0.216626
HLA-DRB1	83	0.0060241	83	0	aa_184del	0.216626
HLA-DRB1	83	0.993976	83	1	aa_184T	0.216626
HLA-DRB1	83	0.0060241	83	0	aa_185del	0.216626
HLA-DRB1	83	0.993976	83	1	aa_185F	0.216626
HLA-DRB1	83	0.0060241	83	0	aa_186del	0.216626
HLA-DRB1	83	0.993976	83	1	aa_186Q	0.216626
HLA-DRB1	83	0.0060241	83	0	aa_187del	0.216626
HLA-DRB1	83	0.993976	83	1	aa_187T	0.216626
HLA-DRB1	83	0.0060241	83	0	aa_188del	0.216626
HLA-DRB1	83	0.993976	83	1	aa_188L	0.216626
HLA-DRB1	83	0.0060241	83	0	aa_189del	0.216626
HLA-DRB1	83	0.993976	83	1	aa_189V	0.216626
HLA-DRB1	83	0.0060241	83	0	aa_190del	0.216626
HLA-DRB1	83	0.993976	83	1	aa_190M	0.216626
HLA-DRB1	83	0.993976	83	1	aa_191L	0.216626
HLA-DRB1	83	0.0060241	83	0	aa_191del	0.216626
HLA-DRB1	83	0.993976	83	1	aa_192E	0.216626
HLA-DRB1	83	0.0060241	83	0	aa_192del	0.216626
HLA-DRB1	83	0.993976	83	1	aa_193T	0.216626
HLA-DRB1	83	0.0060241	83	0	aa_193del	0.216626
HLA-DRB1	83	0.993976	83	1	aa_194V	0.216626
HLA-DRB1	83	0.0060241	83	0	aa_194del	0.216626
HLA-DRB1	83	0.0060241	83	0	aa_195del	0.216626
HLA-DRB1	83	0.993976	83	1	aa_195P	0.216626
HLA-DRB1	83	0.0060241	83	0.0240964	aa_196Q	0.193752
HLA-DRB1	83	0.0060241	83	0	aa_196del	0.216626
HLA-DRB1	83	0.987952	83	0.975904	aa_196R	0.49448
HLA-DRB1	83	0.993976	83	1	aa_197S	0.216626
HLA-DRB1	83	0.0060241	83	0	aa_197del	0.216626
HLA-DRB1	83	0.993976	83	1	aa_198G	0.216626
HLA-DRB1	83	0.0060241	83	0	aa_198del	0.216626
HLA-DRB1	83	0.0060241	83	0	aa_199del	0.216626
HLA-DRB1	83	0.993976	83	1	aa_199E	0.216626
HLA-DRB1	83	0.0060241	83	0	aa_200del	0.216626
HLA-DRB1	83	0.993976	83	1	aa_200V	0.216626
HLA-DRB1	83	0.993976	83	1	aa_201Y	0.216626
HLA-DRB1	83	0.0060241	83	0	aa_201R	0.216626
HLA-DRB1	83	0.993976	83	1	aa_204Q	0.216626
HLA-DRB1	83	0.0060241	83	0	aa_204A	0.216626
HLA-DRB1	83	0.0060241	83	0	aa_205S	0.216626
HLA-DRB1	83	0.993976	83	1	aa_205V	0.216626
HLA-DRB1	83	0.0060241	83	0	aa_206del	0.216626
HLA-DRB1	83	0.993976	83	1	aa_206E	0.216626
HLA-DRB1	83	0.0060241	83	0	aa_207del	0.216626
HLA-DRB1	83	0.993976	83	1	aa_207H	0.216626
HLA-DRB1	83	0.993976	83	1	aa_208P	0.216626
HLA-DRB1	83	0.0060241	83	0	aa_208del	0.216626
HLA-DRB1	83	0.993976	83	1	aa_209S	0.216626
HLA-DRB1	83	0.0060241	83	0	aa_209del	0.216626
HLA-DRB1	83	0.0060241	83	0	aa_210del	0.216626
HLA-DRB1	83	0.120482	83	0.138554	aa_210L	0.344303
HLA-DRB1	83	0.873494	83	0.861446	aa_210V	0.458461
HLA-DRB1	83	0.186747	83	0.144578	aa_211M	0.146663
HLA-DRB1	83	0.807229	83	0.855422	aa_211T	0.101401
HLA-DRB1	83	0.0060241	83	0	aa_211del	0.216626
HLA-DRB1	83	0.0060241	83	0	aa_212del	0.216626
HLA-DRB1	83	0.993976	83	1	aa_212S	0.216626
HLA-DRB1	83	0.0060241	83	0	aa_213del	0.216626
HLA-DRB1	83	0.993976	83	1	aa_213P	0.216626
HLA-DRB1	83	0.993976	83	1	aa_214L	0.216626
HLA-DRB1	83	0.0060241	83	0	aa_214del	0.216626
HLA-DRB1	83	0.993976	83	1	aa_216V	0.216626
HLA-DRB1	83	0.0060241	83	0	aa_216A	0.216626
HLA-DRB1	83	0.993976	83	1	aa_217E	0.216626
HLA-DRB1	83	0.0060241	83	0	aa_217T	0.216626
HLA-DRB1	83	0.945783	83	0.957831	aa_219R	0.249805
HLA-DRB1	83	0.0060241	83	0	aa_219del	0.216626
HLA-DRB1	83	0.0481928	83	0.0421687	aa_219S	0.389597
HLA-DRB1	83	0.993976	83	1	aa_220A	0.216626
HLA-DRB1	83	0.0060241	83	0	aa_220del	0.216626
HLA-DRB1	83	0.993976	83	1	aa_221R	0.216626
HLA-DRB1	83	0.0060241	83	0	aa_221del	0.216626
HLA-DRB1	83	0.993976	83	1	aa_222S	0.216626
HLA-DRB1	83	0.0060241	83	0	aa_222del	0.216626
HLA-DRB1	83	0.0060241	83	0	aa_223del	0.216626
HLA-DRB1	83	0.993976	83	1	aa_223E	0.216626
HLA-DRB1	83	0.0060241	83	0	aa_224del	0.216626
HLA-DRB1	83	0.993976	83	1	aa_224S	0.216626
HLA-DRB1	83	0.0060241	83	0	aa_225del	0.216626
HLA-DRB1	83	0.993976	83	1	aa_225A	0.216626
HLA-DRB1	83	0.0060241	83	0	aa_226del	0.216626
HLA-DRB1	83	0.993976	83	1	aa_226Q	0.216626
HLA-DRB1	83	0.993976	83	1	aa_227S	0.216626
HLA-DRB1	83	0.0060241	83	0	aa_227del	0.216626
HLA-DRB1	83	0.0060241	83	0	aa_228del	0.216626
HLA-DRB1	83	0.993976	83	1	aa_228K	0.216626
HLA-DRB1	83	0.993976	83	1	aa_229M	0.216626
HLA-DRB1	83	0.0060241	83	0	aa_229del	0.216626
HLA-DRB1	83	0.0060241	83	0	aa_230del	0.216626
HLA-DRB1	83	0.993976	83	1	aa_230L	0.216626
HLA-DRB1	83	0.0060241	83	0	aa_231del	0.216626
HLA-DRB1	83	0.993976	83	1	aa_231S	0.216626
HLA-DRB1	83	0.0060241	83	0	aa_232del	0.216626
HLA-DRB1	83	0.993976	83	1	aa_232G	0.216626
HLA-DRB1	83	0.0060241	83	0	aa_233del	0.216626
HLA-DRB1	83	0.993976	83	1	aa_233V	0.216626
HLA-DRB1	83	0.0060241	83	0	aa_234del	0.216626
HLA-DRB1	83	0.993976	83	1	aa_234G	0.216626
HLA-DRB1	83	0.0060241	83	0	aa_235del	0.216626
HLA-DRB1	83	0.993976	83	1	aa_235G	0.216626
HLA-DRB1	83	0.0060241	83	0	aa_236del	0.216626
HLA-DRB1	83	0.993976	83	1	aa_236F	0.216626
HLA-DRB1	83	0.0060241	83	0	aa_237del	0.216626
HLA-DRB1	83	0.993976	83	1	aa_237V	0.216626
HLA-DRB1	83	0.0060241	83	0	aa_238del	0.216626
HLA-DRB1	83	0.993976	83	1	aa_238L	0.216626
HLA-DRB1	83	0.993976	83	1	aa_239G	0.216626
HLA-DRB1	83	0.0060241	83	0	aa_239del	0.216626
HLA-DRB1	83	0.993976	83	1	aa_240L	0.216626
HLA-DRB1	83	0.0060241	83	0	aa_240del	0.216626
HLA-DRB1	83	0.993976	83	1	aa_241L	0.216626
HLA-DRB1	83	0.0060241	83	0	aa_241del	0.216626
HLA-DRB1	83	0.993976	83	1	aa_242F	0.216626
HLA-DRB1	83	0.0060241	83	0	aa_242del	0.216626
HLA-DRB1	83	0.993976	83	1	aa_243L	0.216626
HLA-DRB1	83	0.0060241	83	0	aa_243del	0.216626
HLA-DRB1	83	0.993976	83	1	aa_244G	0.216626
HLA-DRB1	83	0.0060241	83	0	aa_244del	0.216626
HLA-DRB1	83	0.0060241	83	0	aa_245del	0.216626
HLA-DRB1	83	0.993976	83	1	aa_245A	0.216626
HLA-DRB1	83	0.993976	83	1	aa_246G	0.216626
HLA-DRB1	83	0.0060241	83	0	aa_246del	0.216626
HLA-DRB1	83	0.993976	83	1	aa_247L	0.216626
HLA-DRB1	83	0.0060241	83	0	aa_247del	0.216626
HLA-DRB1	83	0.993976	83	1	aa_248F	0.216626
HLA-DRB1	83	0.0060241	83	0	aa_248del	0.216626
HLA-DRB1	83	0.993976	83	1	aa_249I	0.216626
HLA-DRB1	83	0.0060241	83	0	aa_249del	0.216626
HLA-DRB1	83	0.993976	83	1	aa_250Y	0.216626
HLA-DRB1	83	0.0060241	83	0	aa_250del	0.216626
HLA-DRB1	83	0.0060241	83	0	aa_251del	0.216626
HLA-DRB1	83	0.993976	83	1	aa_251F	0.216626
HLA-DRB1	83	0.0060241	83	0	aa_252del	0.216626
HLA-DRB1	83	0.993976	83	1	aa_252R	0.216626
HLA-DRB1	83	0.0060241	83	0	aa_253del	0.216626
HLA-DRB1	83	0.993976	83	1	aa_253N	0.216626
HLA-DRB1	83	0.0060241	83	0	aa_254del	0.216626
HLA-DRB1	83	0.993976	83	1	aa_254Q	0.216626
HLA-DRB1	83	0.993976	83	1	aa_255K	0.216626
HLA-DRB1	83	0.0060241	83	0	aa_255del	0.216626
HLA-DRB1	83	0.0060241	83	0	aa_257S	0.216626
HLA-DRB1	83	0.993976	83	1	aa_257H	0.216626
HLA-DRB1	83	0.993976	83	1	aa_260L	0.216626
HLA-DRB1	83	0.0060241	83	0	aa_260R	0.216626
HLA-DRB1	83	0.993976	83	1	aa_261Q	0.216626
HLA-DRB1	83	0.0060241	83	0	aa_261del	0.216626
HLA-DRB1	83	0.993976	83	1	aa_262P	0.216626
HLA-DRB1	83	0.0060241	83	0	aa_262del	0.216626
HLA-DRB1	83	0.46988	83	0.46988	aa_263T	0.558916
HLA-DRB1	83	0.0060241	83	0	aa_263del	0.216626
HLA-DRB1	83	0.524096	83	0.53012	aa_263R	0.480125
HLA-DRB1	83	0.0060241	83	0	aa_264del	0.216626
HLA-DRB1	83	0.993976	83	1	aa_264G	0.216626
HLA-DRB1	83	0.0060241	83	0	aa_265del	0.216626
HLA-DRB1	83	0.993976	83	1	aa_265F	0.216626
HLA-DRB1	83	0.993976	83	1	aa_266L	0.216626
HLA-DRB1	83	0.0060241	83	0	aa_266del	0.216626
HLA-DRB1	83	0.993976	83	1	aa_267S	0.216626
HLA-DRB1	83	0.0060241	83	0	aa_267del	0.216626
HLA-DRB1	83	0.993976	83	1	aa_268X	0.216626
HLA-DRB1	83	0.0060241	83	0	aa_268del	0.216626
HLA-E	83	0.0060241	83	0	aa_110K	0.450342
HLA-E	83	0.993976	83	1	aa_110E	0.450342
HLA-E	83	0.590361	83	0.524096	aa_128R	0.263446
HLA-E	83	0.409639	83	0.475904	aa_128G	0.263446
HLA-E	83	0.0060241	83	0	aa_217N	0.197389
HLA-E	83	0.993976	83	1	aa_217D	0.197389
HLA-E	83	1	83	0.975904	aa_288P	0.10522
HLA-E	83	0	83	0.0240964	aa_288S	0.10522
HLA-F	83	0.993976	83	0.981928	aa_71P	0.329351
HLA-F	83	0.0060241	83	0.0180723	aa_71Q	0.329351
HLA-F	83	1	83	0.993976	aa_205P	0.569
HLA-F	83	0	83	0.0060241	aa_205T	0.569
HLA-F	83	0.855422	83	0.843373	aa_272S	0.560584
HLA-F	83	0.144578	83	0.156627	aa_272P	0.560584
HLA-G	83	0.0542169	83	0.0421687	aa_55S	0.50852
HLA-G	83	0.945783	83	0.957831	aa_55T	0.50852
HLA-G	83	0.837349	83	0.885542	aa_134L	0.103672
HLA-G	83	0.162651	83	0.114458	aa_134I	0.103672
HLA-G	83	0.0240964	83	0.0060241	aa_154del	0.200063
HLA-G	83	0.975904	83	0.993976	aa_154L	0.200063
HLA-G	83	0.975904	83	0.993976	aa_155R	0.200063
HLA-G	83	0.0240964	83	0.0060241	aa_155del	0.200063
HLA-G	83	0.0240964	83	0.0060241	aa_156del	0.200063
HLA-G	83	0.975904	83	0.993976	aa_156S	0.200063
HLA-G	83	0.975904	83	0.993976	aa_157W	0.200063
HLA-G	83	0.0240964	83	0.0060241	aa_157del	0.200063
HLA-G	83	0.0240964	83	0.0060241	aa_158del	0.200063
HLA-G	83	0.975904	83	0.993976	aa_158T	0.200063
HLA-G	83	0.0240964	83	0.0060241	aa_159C	0.200063
HLA-G	83	0.975904	83	0.993976	aa_159A	0.200063
HLA-G	83	0.975904	83	0.993976	aa_161D	0.200063
HLA-G	83	0.0240964	83	0.0060241	aa_161P	0.200063
HLA-G	83	0.0240964	83	0.0060241	aa_162G	0.200063
HLA-G	83	0.975904	83	0.993976	aa_162T	0.200063
HLA-G	83	0.0240964	83	0.0060241	aa_163P	0.200063
HLA-G	83	0.975904	83	0.993976	aa_163A	0.200063
HLA-G	83	0.0240964	83	0.0060241	aa_164Q	0.200063
HLA-G	83	0.975904	83	0.993976	aa_164A	0.200063
HLA-G	83	0.0240964	83	0.0060241	aa_165R	0.200063
HLA-G	83	0.975904	83	0.993976	aa_165Q	0.200063
HLA-G	83	0.0240964	83	0.0060241	aa_166T	0.200063
HLA-G	83	0.975904	83	0.993976	aa_166I	0.200063
HLA-G	83	0.0240964	83	0.0060241	aa_167L	0.200063
HLA-G	83	0.975904	83	0.993976	aa_167S	0.200063
HLA-G	83	0.0240964	83	0.0060241	aa_168R	0.200063
HLA-G	83	0.975904	83	0.993976	aa_168K	0.200063
HLA-G	83	0.0240964	83	0.0060241	aa_169L	0.200063
HLA-G	83	0.975904	83	0.993976	aa_169R	0.200063
HLA-G	83	0.0240964	83	0.0060241	aa_170R	0.200063
HLA-G	83	0.975904	83	0.993976	aa_170K	0.200063
HLA-G	83	0.0240964	83	0.0060241	aa_171S	0.200063
HLA-G	83	0.975904	83	0.993976	aa_171C	0.200063
HLA-G	83	0.975904	83	0.993976	aa_172E	0.200063
HLA-G	83	0.0240964	83	0.0060241	aa_172P	0.200063
HLA-G	83	0.0240964	83	0.0060241	aa_173S	0.200063
HLA-G	83	0.975904	83	0.993976	aa_173A	0.200063
HLA-G	83	0.0240964	83	0.0060241	aa_175S	0.200063
HLA-G	83	0.975904	83	0.993976	aa_175N	0.200063
HLA-G	83	0.0240964	83	0.0060241	aa_177del	0.200063
HLA-G	83	0.975904	83	0.993976	aa_177A	0.200063
HLA-G	83	0.975904	83	0.993976	aa_178E	0.200063
HLA-G	83	0.0240964	83	0.0060241	aa_178del	0.200063
HLA-G	83	0.975904	83	0.993976	aa_179Q	0.200063
HLA-G	83	0.0240964	83	0.0060241	aa_179del	0.200063
HLA-G	83	0.975904	83	0.993976	aa_182A	0.200063
HLA-G	83	0.0240964	83	0.0060241	aa_182P	0.200063
HLA-G	83	0.0240964	83	0.0060241	aa_183M	0.200063
HLA-G	83	0.975904	83	0.993976	aa_183Y	0.200063
HLA-G	83	0.975904	83	0.993976	aa_184L	0.200063
HLA-G	83	0.0240964	83	0.0060241	aa_184del	0.200063
HLA-G	83	0.975904	83	0.993976	aa_185E	0.200063
HLA-G	83	0.0240964	83	0.0060241	aa_185del	0.200063
HLA-G	83	0.975904	83	0.993976	aa_186G	0.200063
HLA-G	83	0.0240964	83	0.0060241	aa_186del	0.200063
HLA-G	83	0.975904	83	0.993976	aa_187T	0.200063
HLA-G	83	0.0240964	83	0.0060241	aa_187del	0.200063
HLA-G	83	0.975904	83	0.993976	aa_188C	0.200063
HLA-G	83	0.0240964	83	0.0060241	aa_188del	0.200063
HLA-G	83	0.975904	83	0.993976	aa_189V	0.200063
HLA-G	83	0.0240964	83	0.0060241	aa_189del	0.200063
HLA-G	83	0.975904	83	0.993976	aa_190E	0.200063
HLA-G	83	0.0240964	83	0.0060241	aa_190del	0.200063
HLA-G	83	0.975904	83	0.993976	aa_193H	0.200063
HLA-G	83	0.0240964	83	0.0060241	aa_193del	0.200063
HLA-G	83	0.0240964	83	0.0060241	aa_194del	0.200063
HLA-G	83	0.975904	83	0.993976	aa_194R	0.200063
HLA-G	83	0.0240964	83	0.0060241	aa_195del	0.200063
HLA-G	83	0.975904	83	0.993976	aa_195Y	0.200063
HLA-G	83	0.0240964	83	0.0060241	aa_196del	0.200063
HLA-G	83	0.975904	83	0.993976	aa_196L	0.200063
HLA-G	83	0.975904	83	0.993976	aa_197E	0.200063
HLA-G	83	0.0240964	83	0.0060241	aa_197del	0.200063
HLA-G	83	0.0240964	83	0.0060241	aa_199K	0.200063
HLA-G	83	0.975904	83	0.993976	aa_199G	0.200063
HLA-G	83	0.0240964	83	0.0060241	aa_200G	0.200063
HLA-G	83	0.975904	83	0.993976	aa_200K	0.200063
HLA-G	83	0.975904	83	0.993976	aa_202M	0.200063
HLA-G	83	0.0240964	83	0.0060241	aa_202P	0.200063
HLA-G	83	0.0240964	83	0.0060241	aa_203T	0.200063
HLA-G	83	0.975904	83	0.993976	aa_203L	0.200063
HLA-G	83	0.975904	83	0.993976	aa_204Q	0.200063
HLA-G	83	0.0240964	83	0.0060241	aa_204W	0.200063
HLA-G	83	0.975904	83	0.993976	aa_207D	0.200063
HLA-G	83	0.0240964	83	0.0060241	aa_207del	0.200063
HLA-G	83	0.975904	83	0.993976	aa_208P	0.200063
HLA-G	83	0.0240964	83	0.0060241	aa_208del	0.200063
HLA-G	83	0.0240964	83	0.0060241	aa_209del	0.200063
HLA-G	83	0.975904	83	0.993976	aa_209P	0.200063
HLA-G	83	0.975904	83	0.993976	aa_210K	0.200063
HLA-G	83	0.0240964	83	0.0060241	aa_210del	0.200063
HLA-G	83	0.0240964	83	0.0060241	aa_211del	0.200063
HLA-G	83	0.975904	83	0.993976	aa_211T	0.200063
HLA-G	83	0.0240964	83	0.0060241	aa_212del	0.200063
HLA-G	83	0.975904	83	0.993976	aa_212H	0.200063
HLA-G	83	0.975904	83	0.993976	aa_213V	0.200063
HLA-G	83	0.0240964	83	0.0060241	aa_213del	0.200063
HLA-G	83	0.0240964	83	0.0060241	aa_214del	0.200063
HLA-G	83	0.975904	83	0.993976	aa_214T	0.200063
HLA-G	83	0.975904	83	0.993976	aa_215H	0.200063
HLA-G	83	0.0240964	83	0.0060241	aa_215del	0.200063
HLA-G	83	0.0240964	83	0.0060241	aa_216del	0.200063
HLA-G	83	0.975904	83	0.993976	aa_216H	0.200063
HLA-G	83	0.975904	83	0.993976	aa_217P	0.200063
HLA-G	83	0.0240964	83	0.0060241	aa_217del	0.200063
HLA-G	83	0.0240964	83	0.0060241	aa_218del	0.200063
HLA-G	83	0.975904	83	0.993976	aa_218V	0.200063
HLA-G	83	0.975904	83	0.993976	aa_219F	0.200063
HLA-G	83	0.0240964	83	0.0060241	aa_219del	0.200063
HLA-G	83	0.0240964	83	0.0060241	aa_220del	0.200063
HLA-G	83	0.975904	83	0.993976	aa_220D	0.200063
HLA-G	83	0.0240964	83	0.0060241	aa_221del	0.200063
HLA-G	83	0.975904	83	0.993976	aa_221Y	0.200063
HLA-G	83	0.975904	83	0.993976	aa_222E	0.200063
HLA-G	83	0.0240964	83	0.0060241	aa_222del	0.200063
HLA-G	83	0.0240964	83	0.0060241	aa_223del	0.200063
HLA-G	83	0.975904	83	0.993976	aa_223A	0.200063
HLA-G	83	0.0240964	83	0.0060241	aa_224del	0.200063
HLA-G	83	0.975904	83	0.993976	aa_224T	0.200063
HLA-G	83	0.0240964	83	0.0060241	aa_225del	0.200063
HLA-G	83	0.975904	83	0.993976	aa_225L	0.200063
HLA-G	83	0.975904	83	0.993976	aa_227C	0.200063
HLA-G	83	0.0240964	83	0.0060241	aa_227A	0.200063
HLA-G	83	0.0240964	83	0.0060241	aa_229S	0.200063
HLA-G	83	0.975904	83	0.993976	aa_229A	0.200063
HLA-G	83	0.975904	83	0.993976	aa_230L	0.200063
HLA-G	83	0.0240964	83	0.0060241	aa_230del	0.200063
HLA-G	83	0.0240964	83	0.0060241	aa_231del	0.200063
HLA-G	83	0.975904	83	0.993976	aa_231G	0.200063
HLA-G	83	0.975904	83	0.993976	aa_232F	0.200063
HLA-G	83	0.0240964	83	0.0060241	aa_232del	0.200063
HLA-G	83	0.0240964	83	0.0060241	aa_233del	0.200063
HLA-G	83	0.975904	83	0.993976	aa_233Y	0.200063
HLA-G	83	0.975904	83	0.993976	aa_234P	0.200063
HLA-G	83	0.0240964	83	0.0060241	aa_234del	0.200063
HLA-G	83	0.975904	83	0.993976	aa_235A	0.200063
HLA-G	83	0.0240964	83	0.0060241	aa_235del	0.200063
HLA-G	83	0.0240964	83	0.0060241	aa_236del	0.200063
HLA-G	83	0.975904	83	0.993976	aa_236E	0.200063
HLA-G	83	0.0240964	83	0.0060241	aa_237del	0.200063
HLA-G	83	0.975904	83	0.993976	aa_237I	0.200063
HLA-G	83	0.975904	83	0.993976	aa_238I	0.200063
HLA-G	83	0.0240964	83	0.0060241	aa_238del	0.200063
HLA-G	83	0.0240964	83	0.0060241	aa_239del	0.200063
HLA-G	83	0.975904	83	0.993976	aa_239L	0.200063
HLA-G	83	0.975904	83	0.993976	aa_240T	0.200063
HLA-G	83	0.0240964	83	0.0060241	aa_240del	0.200063
HLA-G	83	0.0240964	83	0.0060241	aa_241del	0.200063
HLA-G	83	0.975904	83	0.993976	aa_241W	0.200063
HLA-G	83	0.0240964	83	0.0060241	aa_242del	0.200063
HLA-G	83	0.975904	83	0.993976	aa_242Q	0.200063
HLA-G	83	0.0240964	83	0.0060241	aa_243del	0.200063
HLA-G	83	0.975904	83	0.993976	aa_243R	0.200063
HLA-G	83	0.0240964	83	0.0060241	aa_244del	0.200063
HLA-G	83	0.975904	83	0.993976	aa_244D	0.200063
HLA-G	83	0.975904	83	0.993976	aa_245G	0.200063
HLA-G	83	0.0240964	83	0.0060241	aa_245del	0.200063
HLA-G	83	0.0240964	83	0.0060241	aa_246del	0.200063
HLA-G	83	0.975904	83	0.993976	aa_246E	0.200063
HLA-G	83	0.0240964	83	0.0060241	aa_247del	0.200063
HLA-G	83	0.975904	83	0.993976	aa_247D	0.200063
HLA-G	83	0.0240964	83	0.0060241	aa_248del	0.200063
HLA-G	83	0.975904	83	0.993976	aa_248Q	0.200063
HLA-G	83	0.0240964	83	0.0060241	aa_249del	0.200063
HLA-G	83	0.975904	83	0.993976	aa_249T	0.200063
HLA-G	83	0.975904	83	0.993976	aa_250Q	0.200063
HLA-G	83	0.0240964	83	0.0060241	aa_250del	0.200063
HLA-G	83	0.0240964	83	0.0060241	aa_251del	0.200063
HLA-G	83	0.975904	83	0.993976	aa_251D	0.200063
HLA-G	83	0.975904	83	0.993976	aa_252V	0.200063
HLA-G	83	0.0240964	83	0.0060241	aa_252del	0.200063
HLA-G	83	0.975904	83	0.993976	aa_253E	0.200063
HLA-G	83	0.0240964	83	0.0060241	aa_253del	0.200063
HLA-G	83	0.0240964	83	0.0060241	aa_254del	0.200063
HLA-G	83	0.975904	83	0.993976	aa_254L	0.200063
HLA-G	83	0.975904	83	0.987952	aa_255V	0.385018
HLA-G	83	0.0240964	83	0.0060241	aa_255del	0.200063
HLA-G	83	0	83	0.0060241	aa_255M	0.458892
HLA-G	83	0.0240964	83	0.0060241	aa_256del	0.200063
HLA-G	83	0.975904	83	0.993976	aa_256E	0.200063
HLA-G	83	0.975904	83	0.993976	aa_257T	0.200063
HLA-G	83	0.0240964	83	0.0060241	aa_257del	0.200063
HLA-G	83	0.0240964	83	0.0060241	aa_258del	0.200063
HLA-G	83	0.975904	83	0.993976	aa_258R	0.200063
HLA-G	83	0.975904	83	0.993976	aa_259P	0.200063
HLA-G	83	0.0240964	83	0.0060241	aa_259del	0.200063
HLA-G	83	0.0240964	83	0.0060241	aa_260del	0.200063
HLA-G	83	0.975904	83	0.993976	aa_260A	0.200063
HLA-G	83	0.975904	83	0.993976	aa_261G	0.200063
HLA-G	83	0.0240964	83	0.0060241	aa_261del	0.200063
HLA-G	83	0.0240964	83	0.0060241	aa_262del	0.200063
HLA-G	83	0.975904	83	0.993976	aa_262D	0.200063
HLA-G	83	0.975904	83	0.993976	aa_264T	0.200063
HLA-G	83	0.0240964	83	0.0060241	aa_264S	0.200063
HLA-G	83	0.975904	83	0.993976	aa_265F	0.200063
HLA-G	83	0.0240964	83	0.0060241	aa_265T	0.200063
HLA-G	83	0.0240964	83	0.0060241	aa_266D	0.200063
HLA-G	83	0.975904	83	0.993976	aa_266Q	0.200063
HLA-G	83	0.975904	83	0.993976	aa_267K	0.200063
HLA-G	83	0.0240964	83	0.0060241	aa_267T	0.200063
HLA-G	83	0.0240964	83	0.0060241	aa_269del	0.200063
HLA-G	83	0.975904	83	0.993976	aa_269A	0.200063
HLA-G	83	0.975904	83	0.993976	aa_270A	0.200063
HLA-G	83	0.0240964	83	0.0060241	aa_270del	0.200063
HLA-G	83	0.0240964	83	0.0060241	aa_271del	0.200063
HLA-G	83	0.975904	83	0.993976	aa_271V	0.200063
HLA-G	83	0.975904	83	0.993976	aa_272V	0.200063
HLA-G	83	0.0240964	83	0.0060241	aa_272del	0.200063
HLA-G	83	0.975904	83	0.993976	aa_273V	0.200063
HLA-G	83	0.0240964	83	0.0060241	aa_273del	0.200063
HLA-G	83	0.975904	83	0.993976	aa_274P	0.200063
HLA-G	83	0.0240964	83	0.0060241	aa_274del	0.200063
HLA-G	83	0.0240964	83	0.0060241	aa_275del	0.200063
HLA-G	83	0.975904	83	0.993976	aa_275S	0.200063
HLA-G	83	0.0240964	83	0.0060241	aa_276del	0.200063
HLA-G	83	0.975904	83	0.993976	aa_276G	0.200063
HLA-G	83	0.975904	83	0.993976	aa_277E	0.200063
HLA-G	83	0.0240964	83	0.0060241	aa_277R	0.200063
HLA-G	83	0.975904	83	0.993976	aa_278E	0.200063
HLA-G	83	0.0240964	83	0.0060241	aa_278T	0.200063
HLA-G	83	0.0240964	83	0.0060241	aa_279G	0.200063
HLA-G	83	0.975904	83	0.993976	aa_279Q	0.200063
HLA-G	83	0.975904	83	0.993976	aa_281Y	0.200063
HLA-G	83	0.0240964	83	0.0060241	aa_281R	0.200063
HLA-G	83	0.0240964	83	0.0060241	aa_282C	0.200063
HLA-G	83	0.933735	83	0.939759	aa_282T	0.947766
HLA-G	83	0.0421687	83	0.0542169	aa_282M	0.413416
HLA-G	83	0.0240964	83	0.0060241	aa_284del	0.200063
HLA-G	83	0.975904	83	0.993976	aa_284H	0.200063
HLA-G	83	0.0240964	83	0.0060241	aa_285del	0.200063
HLA-G	83	0.975904	83	0.993976	aa_285V	0.200063
HLA-G	83	0.975904	83	0.993976	aa_286Q	0.200063
HLA-G	83	0.0240964	83	0.0060241	aa_286del	0.200063
HLA-G	83	0.0240964	83	0.0060241	aa_287del	0.200063
HLA-G	83	0.975904	83	0.993976	aa_287H	0.200063
HLA-G	83	0.975904	83	0.993976	aa_288E	0.200063
HLA-G	83	0.0240964	83	0.0060241	aa_288del	0.200063
HLA-G	83	0.975904	83	0.993976	aa_289G	0.200063
HLA-G	83	0.0240964	83	0.0060241	aa_289del	0.200063
HLA-G	83	0.0240964	83	0.0060241	aa_290del	0.200063
HLA-G	83	0.975904	83	0.993976	aa_290L	0.200063
HLA-G	83	0.975904	83	0.993976	aa_291P	0.200063
HLA-G	83	0.0240964	83	0.0060241	aa_291del	0.200063
HLA-G	83	0.0240964	83	0.0060241	aa_292del	0.200063
HLA-G	83	0.975904	83	0.993976	aa_292E	0.200063
HLA-G	83	0.975904	83	0.993976	aa_293P	0.200063
HLA-G	83	0.0240964	83	0.0060241	aa_293del	0.200063
HLA-G	83	0.975904	83	0.993976	aa_294L	0.200063
HLA-G	83	0.0240964	83	0.0060241	aa_294del	0.200063
HLA-G	83	0.0240964	83	0.0060241	aa_295del	0.200063
HLA-G	83	0.975904	83	0.993976	aa_295M	0.200063
HLA-G	83	0.0240964	83	0.0060241	aa_296del	0.200063
HLA-G	83	0.975904	83	0.993976	aa_296L	0.200063
HLA-G	83	0.975904	83	0.993976	aa_297R	0.200063
HLA-G	83	0.0240964	83	0.0060241	aa_297del	0.200063
HLA-G	83	0.975904	83	0.993976	aa_298W	0.200063
HLA-G	83	0.0240964	83	0.0060241	aa_298del	0.200063
HLA-G	83	0.0240964	83	0.0060241	aa_299del	0.200063
HLA-G	83	0.975904	83	0.993976	aa_299K	0.200063
HLA-G	83	0.975904	83	0.993976	aa_300Q	0.200063
HLA-G	83	0.0240964	83	0.0060241	aa_300del	0.200063
HLA-G	83	0.975904	83	0.993976	aa_301S	0.200063
HLA-G	83	0.0240964	83	0.0060241	aa_301del	0.200063
HLA-G	83	0.975904	83	0.993976	aa_303L	0.200063
HLA-G	83	0.0240964	83	0.0060241	aa_303A	0.200063
HLA-G	83	0.0240964	83	0.0060241	aa_304R	0.200063
HLA-G	83	0.975904	83	0.993976	aa_304P	0.200063
HLA-G	83	0.0240964	83	0.0060241	aa_306P	0.200063
HLA-G	83	0.975904	83	0.993976	aa_306I	0.200063
HLA-G	83	0.975904	83	0.993976	aa_308I	0.200063
HLA-G	83	0.0240964	83	0.0060241	aa_308del	0.200063
HLA-G	83	0.975904	83	0.993976	aa_309M	0.200063
HLA-G	83	0.0240964	83	0.0060241	aa_309del	0.200063
HLA-G	83	0.975904	83	0.993976	aa_310G	0.200063
HLA-G	83	0.0240964	83	0.0060241	aa_310del	0.200063
HLA-G	83	0.0240964	83	0.0060241	aa_311del	0.200063
HLA-G	83	0.975904	83	0.993976	aa_311I	0.200063
HLA-G	83	0.975904	83	0.993976	aa_312V	0.200063
HLA-G	83	0.0240964	83	0.0060241	aa_312del	0.200063
HLA-G	83	0.0240964	83	0.0060241	aa_313del	0.200063
HLA-G	83	0.975904	83	0.993976	aa_313A	0.200063
HLA-G	83	0.0240964	83	0.0060241	aa_314del	0.200063
HLA-G	83	0.975904	83	0.993976	aa_314G	0.200063
HLA-G	83	0.975904	83	0.993976	aa_315L	0.200063
HLA-G	83	0.0240964	83	0.0060241	aa_315del	0.200063
HLA-G	83	0.975904	83	0.993976	aa_316V	0.200063
HLA-G	83	0.0240964	83	0.0060241	aa_316del	0.200063
HLA-G	83	0.0240964	83	0.0060241	aa_317del	0.200063
HLA-G	83	0.975904	83	0.993976	aa_317V	0.200063
HLA-G	83	0.0240964	83	0.0060241	aa_318del	0.200063
HLA-G	83	0.975904	83	0.993976	aa_318L	0.200063
HLA-G	83	0.0240964	83	0.0060241	aa_319del	0.200063
HLA-G	83	0.975904	83	0.993976	aa_319A	0.200063
HLA-G	83	0.975904	83	0.993976	aa_320A	0.200063
HLA-G	83	0.0240964	83	0.0060241	aa_320del	0.200063
HLA-G	83	0.975904	83	0.993976	aa_321V	0.200063
HLA-G	83	0.0240964	83	0.0060241	aa_321del	0.200063
HLA-G	83	0.975904	83	0.993976	aa_322V	0.200063
HLA-G	83	0.0240964	83	0.0060241	aa_322del	0.200063
HLA-G	83	0.0240964	83	0.0060241	aa_323del	0.200063
HLA-G	83	0.975904	83	0.993976	aa_323T	0.200063
HLA-G	83	0.0240964	83	0.0060241	aa_324del	0.200063
HLA-G	83	0.975904	83	0.993976	aa_324G	0.200063
HLA-G	83	0.0240964	83	0.0060241	aa_325del	0.200063
HLA-G	83	0.975904	83	0.993976	aa_325A	0.200063
HLA-G	83	0.975904	83	0.993976	aa_326A	0.200063
HLA-G	83	0.0240964	83	0.0060241	aa_326del	0.200063
HLA-G	83	0.975904	83	0.993976	aa_327V	0.200063
HLA-G	83	0.0240964	83	0.0060241	aa_327del	0.200063
HLA-G	83	0.975904	83	0.993976	aa_328A	0.200063
HLA-G	83	0.0240964	83	0.0060241	aa_328del	0.200063
HLA-G	83	0.975904	83	0.993976	aa_329A	0.200063
HLA-G	83	0.0240964	83	0.0060241	aa_329del	0.200063
HLA-G	83	0.0240964	83	0.0060241	aa_330del	0.200063
HLA-G	83	0.975904	83	0.993976	aa_330V	0.200063
HLA-G	83	0.0240964	83	0.0060241	aa_331del	0.200063
HLA-G	83	0.975904	83	0.993976	aa_331L	0.200063
HLA-G	83	0.975904	83	0.993976	aa_332W	0.200063
HLA-G	83	0.0240964	83	0.0060241	aa_332del	0.200063
HLA-G	83	0.0240964	83	0.0060241	aa_334H	0.200063
HLA-G	83	0.975904	83	0.993976	aa_334K	0.200063
HLA-G	83	0.975904	83	0.993976	aa_335K	0.200063
HLA-G	83	0.0240964	83	0.0060241	aa_335T	0.200063
HLA-G	83	0.975904	83	0.993976	aa_336S	0.200063
HLA-G	83	0.0240964	83	0.0060241	aa_336X	0.200063
HLA-G	83	0.0240964	83	0.0060241	aa_337del	0.200063
HLA-G	83	0.975904	83	0.993976	aa_337S	0.200063
HLA-G	83	0.975904	83	0.993976	aa_338D	0.200063
HLA-G	83	0.0240964	83	0.0060241	aa_338del	0.200063
HLA-G	83	0.0240964	83	0.0060241	aa_339del	0.200063
HLA-G	83	0.975904	83	0.993976	aa_339X	0.200063
MICA	83	0.975904	83	0.963855	aa_29R	0.58559
MICA	83	0.0240964	83	0.0361446	aa_29P	0.58559
MICA	83	0.253012	83	0.204819	aa_37G	0.303183
MICA	83	0.746988	83	0.795181	aa_37W	0.303183
MICA	83	0.0722892	83	0.060241	aa_47T	0.654653
MICA	83	0.927711	83	0.939759	aa_47A	0.654653
MICA	83	0.993976	83	1	aa_49V	0.488978
MICA	83	0.0060241	83	0	aa_49G	0.488978
MICA	83	0.650602	83	0.698795	aa_59Y	0.318851
MICA	83	0.349398	83	0.301205	aa_59C	0.318851
MICA	83	0.963855	83	0.975904	aa_114Q	0.657895
MICA	83	0.0361446	83	0.0240964	aa_114R	0.657895
MICA	83	0.692771	83	0.759036	aa_145L	0.23898
MICA	83	0.307229	83	0.240964	aa_145V	0.23898
MICA	83	0.0361446	83	0.0240964	aa_148K	0.4875
MICA	83	0.963855	83	0.975904	aa_148E	0.4875
MICA	83	0.349398	83	0.301205	aa_152M	0.318851
MICA	83	0.650602	83	0.698795	aa_152V	0.318851
MICA	83	0.951807	83	0.963855	aa_174M	0.485347
MICA	83	0.0481928	83	0.0361446	aa_174V	0.485347
MICA	83	0	83	0.0060241	aa_179R	0.523021
MICA	83	0.0060241	83	0.0060241	aa_179L	0.65281
MICA	83	0.993976	83	0.987952	aa_179H	0.462681
MICA	83	0.650602	83	0.698795	aa_196E	0.318851
MICA	83	0.349398	83	0.301205	aa_196K	0.318851
MICA	83	0.614458	83	0.656627	aa_198G	0.601377
MICA	83	0.385542	83	0.343373	aa_198S	0.601377
MICA	83	0.0060241	83	0.0120482	aa_199I	0.355003
MICA	83	0.993976	83	0.987952	aa_199V	0.355003
MICA	83	0.813253	83	0.89759	aa_204T	0.038103
MICA	83	0.186747	83	0.10241	aa_204R	0.038103
MICA	83	0.349398	83	0.301205	aa_229G	0.318851
MICA	83	0.650602	83	0.698795	aa_229S	0.318851
MICA	83	0.349398	83	0.301205	aa_233W	0.318851
MICA	83	0.650602	83	0.698795	aa_233R	0.318851
MICA	83	0.343373	83	0.457831	aa_236I	0.045073
MICA	83	0.656627	83	0.542169	aa_236T	0.045073
MICA	83	0.349398	83	0.301205	aa_238S	0.318851
MICA	83	0.650602	83	0.698795	aa_238T	0.318851
MICA	83	0.945783	83	0.957831	aa_244V	0.776621
MICA	83	0.0542169	83	0.0421687	aa_244L	0.776621
MICA	83	0.343373	83	0.457831	aa_274R	0.045073
MICA	83	0.656627	83	0.536145	aa_274Q	0.03003
MICA	83	0	83	0.0060241	aa_274E	0.161048
MICA	83	0	83	0.0060241	aa_279S	0.523021
MICA	83	1	83	0.993976	aa_279R	0.523021
MICA	83	0.0542169	83	0.0361446	aa_294A	0.386855
MICA	83	0.945783	83	0.963855	aa_294P	0.386855
MICA	83	0.963855	83	0.975904	aa_300V	0.657895
MICA	83	0.0361446	83	0.0240964	aa_300C	0.657895
MICA	83	0.0361446	83	0.0240964	aa_301W	0.657895
MICA	83	0.963855	83	0.975904	aa_301L	0.657895
MICA	83	0.963855	83	0.975904	aa_302del	0.657895
MICA	83	0.0361446	83	0.0240964	aa_302C	0.657895
MICA	83	0.963855	83	0.975904	aa_303del	0.657895
MICA	83	0.0361446	83	0.0240964	aa_303F	0.657895
MICA	83	0.963855	83	0.975904	aa_304del	0.657895
MICA	83	0.0361446	83	0.0240964	aa_304R	0.657895
MICA	83	0.963855	83	0.975904	aa_306L	0.657895
MICA	83	0.0361446	83	0.0240964	aa_306I	0.657895
MICA	83	0.0361446	83	0.0240964	aa_307G	0.657895
MICA	83	0.963855	83	0.975904	aa_307Q	0.657895
MICA	83	0.963855	83	0.975904	aa_308S	0.657895
MICA	83	0.0361446	83	0.0240964	aa_308R	0.657895
MICA	83	0.963855	83	0.975904	aa_310W	0.657895
MICA	83	0.0361446	83	0.0240964	aa_310del	0.657895
MICA	83	0.963855	83	0.975904	aa_311Q	0.657895
MICA	83	0.0361446	83	0.0240964	aa_311S	0.657895
MICA	83	0.963855	83	0.975904	aa_312T	0.657895
MICA	83	0.0361446	83	0.0240964	aa_312M	0.657895
MICA	83	0.963855	83	0.975904	aa_314H	0.657895
MICA	83	0.0361446	83	0.0240964	aa_314L	0.657895
MICA	83	0.0361446	83	0.0240964	aa_315L	0.657895
MICA	83	0.963855	83	0.975904	aa_315V	0.657895
MICA	83	0.963855	83	0.975904	aa_316S	0.657895
MICA	83	0.0361446	83	0.0240964	aa_316L	0.657895
MICA	83	0.0361446	83	0.0240964	aa_317L	0.657895
MICA	83	0.963855	83	0.975904	aa_317A	0.657895
MICA	83	0.963855	83	0.975904	aa_318V	0.657895
MICA	83	0.0361446	83	0.0240964	aa_318L	0.657895
MICA	83	0.162651	83	0.138554	aa_319A	0.566905
MICA	83	0.837349	83	0.861446	aa_319del	0.566905
MICA	83	0.162651	83	0.138554	aa_320A	0.566905
MICA	83	0.837349	83	0.861446	aa_320del	0.566905
MICA	83	0.162651	83	0.138554	aa_321A	0.566905
MICA	83	0.837349	83	0.861446	aa_321del	0.566905
MICA	83	0.524096	83	0.421687	aa_322A	0.09214
MICA	83	0.439759	83	0.554217	aa_322del	0.06495
MICA	83	0.0361446	83	0.0240964	aa_322L	0.657895
MICA	83	0.86747	83	0.879518	aa_323A	0.7747
MICA	83	0.0361446	83	0.0240964	aa_323L	0.657895
MICA	83	0.0963855	83	0.0963855	aa_323del	0.94038
MICA	83	0.0361446	83	0.0240964	aa_324L	0.657895
MICA	83	0.963855	83	0.975904	aa_324A	0.657895
MICA	83	0.0361446	83	0.0240964	aa_325L	0.657895
MICA	83	0.23494	83	0.349398	aa_325G	0.04346
MICA	83	0.728916	83	0.626506	aa_325A	0.0717
MICA	83	0.728916	83	0.626506	aa_326A	0.0717
MICA	83	0.0361446	83	0.0240964	aa_326L	0.657895
MICA	83	0.23494	83	0.349398	aa_326C	0.04346
MICA	83	0.728916	83	0.626506	aa_327A	0.0717
MICA	83	0.23494	83	0.349398	aa_327C	0.04346
MICA	83	0.0361446	83	0.0240964	aa_327L	0.657895
MICA	83	0.0361446	83	0.0240964	aa_328L	0.657895
MICA	83	0.23494	83	0.349398	aa_328Y	0.04346
MICA	83	0.728916	83	0.626506	aa_328I	0.0717
MICA	83	0.23494	83	0.349398	aa_330C	0.04346
MICA	83	0.0361446	83	0.0240964	aa_330L	0.657895
MICA	83	0.728916	83	0.626506	aa_330V	0.0717
MICA	83	0.23494	83	0.349398	aa_331del	0.04346
MICA	83	0.0361446	83	0.0240964	aa_331L	0.657895
MICA	83	0.728916	83	0.626506	aa_331I	0.0717
MICA	83	0.0361446	83	0.0240964	aa_332L	0.657895
MICA	83	0.23494	83	0.349398	aa_332del	0.04346
MICA	83	0.728916	83	0.626506	aa_332I	0.0717
MICA	83	0.23494	83	0.349398	aa_333Y	0.04346
MICA	83	0.728916	83	0.626506	aa_333I	0.0717
MICA	83	0.0361446	83	0.0240964	aa_333L	0.657895
MICA	83	0.76506	83	0.650602	aa_334F	0.04346
MICA	83	0.23494	83	0.349398	aa_334Y	0.04346
MICA	83	0.963855	83	0.975904	aa_335Y	0.657895
MICA	83	0.0361446	83	0.0240964	aa_335S	0.657895
MICA	83	0.728916	83	0.626506	aa_336V	0.0717
MICA	83	0.23494	83	0.349398	aa_336F	0.04346
MICA	83	0.0361446	83	0.0240964	aa_336T	0.657895
MICA	83	0.512048	83	0.439759	aa_337R	0.282038
MICA	83	0.216867	83	0.186747	aa_337C	0.418397
MICA	83	0.0361446	83	0.0240964	aa_337del	0.657895
MICA	83	0.23494	83	0.349398	aa_337L	0.04346
MICA	83	0.963855	83	0.975904	aa_338C	0.657895
MICA	83	0.0361446	83	0.0240964	aa_338del	0.657895
MICA	83	0.271084	83	0.373494	aa_339del	0.0717
MICA	83	0.728916	83	0.626506	aa_339C	0.0717
MICA	83	0.271084	83	0.373494	aa_340del	0.0717
MICA	83	0.728916	83	0.626506	aa_340K	0.0717
MICA	83	0.728916	83	0.626506	aa_341K	0.0717
MICA	83	0.271084	83	0.373494	aa_341del	0.0717
MICA	83	0.271084	83	0.373494	aa_342del	0.0717
MICA	83	0.728916	83	0.626506	aa_342K	0.0717
MICA	83	0.728916	83	0.626506	aa_343T	0.0717
MICA	83	0.271084	83	0.373494	aa_343del	0.0717
MICA	83	0.271084	83	0.373494	aa_344del	0.0717
MICA	83	0.728916	83	0.626506	aa_344S	0.0717
MICA	83	0.271084	83	0.373494	aa_345del	0.0717
MICA	83	0.728916	83	0.626506	aa_345A	0.0717
MICA	83	0.271084	83	0.373494	aa_346del	0.0717
MICA	83	0.728916	83	0.626506	aa_346A	0.0717
MICA	83	0.728916	83	0.626506	aa_347E	0.0717
MICA	83	0.271084	83	0.373494	aa_347del	0.0717
MICA	83	0.271084	83	0.373494	aa_348del	0.0717
MICA	83	0.728916	83	0.626506	aa_348G	0.0717
MICA	83	0.271084	83	0.373494	aa_349del	0.0717
MICA	83	0.728916	83	0.626506	aa_349P	0.0717
MICA	83	0.271084	83	0.373494	aa_350del	0.0717
MICA	83	0.728916	83	0.626506	aa_350E	0.0717
MICA	83	0.728916	83	0.626506	aa_351L	0.0717
MICA	83	0.271084	83	0.373494	aa_351del	0.0717
MICA	83	0.271084	83	0.373494	aa_352del	0.0717
MICA	83	0.728916	83	0.626506	aa_352V	0.0717
MICA	83	0.76506	83	0.650602	aa_353S	0.04346
MICA	83	0.23494	83	0.349398	aa_353del	0.04346
MICA	83	0.728916	83	0.626506	aa_354L	0.0717
MICA	83	0.23494	83	0.349398	aa_354del	0.04346
MICA	83	0.0361446	83	0.0240964	aa_354V	0.657895
MICA	83	0.728916	83	0.626506	aa_355Q	0.0717
MICA	83	0.0361446	83	0.0240964	aa_355V	0.657895
MICA	83	0.23494	83	0.349398	aa_355del	0.04346
MICA	83	0.23494	83	0.349398	aa_356del	0.04346
MICA	83	0.76506	83	0.650602	aa_356V	0.04346
MICA	83	0.0361446	83	0.0240964	aa_357R	0.657895
MICA	83	0.728916	83	0.626506	aa_357L	0.0717
MICA	83	0.23494	83	0.349398	aa_357del	0.04346
MICA	83	0.728916	83	0.626506	aa_358D	0.0717
MICA	83	0.23494	83	0.349398	aa_358del	0.04346
MICA	83	0.0361446	83	0.0240964	aa_358R	0.657895
MICA	83	0.0361446	83	0.0240964	aa_359K	0.657895
MICA	83	0.23494	83	0.349398	aa_359del	0.04346
MICA	83	0.728916	83	0.626506	aa_359Q	0.0717
MICA	83	0.23494	83	0.349398	aa_360del	0.04346
MICA	83	0.76506	83	0.650602	aa_360H	0.04346
MICA	83	0.23494	83	0.349398	aa_361del	0.04346
MICA	83	0.728916	83	0.626506	aa_361P	0.0717
MICA	83	0.0361446	83	0.0240964	aa_361Q	0.657895
MICA	83	0.728916	83	0.626506	aa_362V	0.0717
MICA	83	0.271084	83	0.373494	aa_362del	0.0717
MICA	83	0.728916	83	0.626506	aa_363G	0.0717
MICA	83	0.271084	83	0.373494	aa_363del	0.0717
MICA	83	0.0060241	83	0.0120482	aa_364M	0.90784
MICA	83	0.722892	83	0.614458	aa_364T	0.07327
MICA	83	0.271084	83	0.373494	aa_364del	0.0717
MICA	83	0.728916	83	0.626506	aa_365S	0.0717
MICA	83	0.271084	83	0.373494	aa_365del	0.0717
MICA	83	0.728916	83	0.626506	aa_366D	0.0717
MICA	83	0.271084	83	0.373494	aa_366del	0.0717
MICA	83	0.271084	83	0.373494	aa_367del	0.0717
MICA	83	0.728916	83	0.626506	aa_367H	0.0717
MICA	83	0.271084	83	0.373494	aa_368del	0.0717
MICA	83	0.728916	83	0.626506	aa_368R	0.0717
MICA	83	0.728916	83	0.626506	aa_369D	0.0717
MICA	83	0.271084	83	0.373494	aa_369del	0.0717
MICA	83	0.728916	83	0.626506	aa_370A	0.0717
MICA	83	0.271084	83	0.373494	aa_370del	0.0717
MICA	83	0.271084	83	0.373494	aa_371del	0.0717
MICA	83	0.728916	83	0.626506	aa_371T	0.0717
MICA	83	0.271084	83	0.373494	aa_372del	0.0717
MICA	83	0.728916	83	0.626506	aa_372Q	0.0717
MICA	83	0.271084	83	0.373494	aa_373del	0.0717
MICA	83	0.728916	83	0.626506	aa_373L	0.0717
MICA	83	0.728916	83	0.626506	aa_374G	0.0717
MICA	83	0.271084	83	0.373494	aa_374del	0.0717
MICA	83	0.728916	83	0.626506	aa_375F	0.0717
MICA	83	0.23494	83	0.349398	aa_375del	0.04346
MICA	83	0.0361446	83	0.0240964	aa_375L	0.657895
MICA	83	0.23494	83	0.349398	aa_376del	0.04346
MICA	83	0.76506	83	0.650602	aa_376Q	0.04346
MICA	83	0.0361446	83	0.0240964	aa_377R	0.657895
MICA	83	0.963855	83	0.975904	aa_377P	0.657895
MICA	83	0.0361446	83	0.0240964	aa_378V	0.657895
MICA	83	0.963855	83	0.975904	aa_378L	0.657895
MICA	83	0.728916	83	0.626506	aa_379M	0.0717
MICA	83	0.23494	83	0.349398	aa_379L	0.04346
MICA	83	0.0361446	83	0.0240964	aa_379Q	0.657895
MICA	83	0.76506	83	0.650602	aa_380S	0.04346
MICA	83	0.23494	83	0.349398	aa_380X	0.04346
MICA	83	0.0361446	83	0.0240964	aa_381S	0.657895
MICA	83	0.457831	83	0.385542	aa_381A	0.26197
MICA	83	0.271084	83	0.240964	aa_381D	0.457799
MICA	83	0.23494	83	0.349398	aa_381del	0.04346
MICA	83	0.728916	83	0.626506	aa_382L	0.0717
MICA	83	0.23494	83	0.349398	aa_382del	0.04346
MICA	83	0.0361446	83	0.0240964	aa_382X	0.657895
MICA	83	0.271084	83	0.373494	aa_383del	0.0717
MICA	83	0.728916	83	0.626506	aa_383G	0.0717
MICA	83	0.271084	83	0.373494	aa_384del	0.0717
MICA	83	0.728916	83	0.626506	aa_384S	0.0717
MICA	83	0.0361446	83	0.0361446	aa_385A	0.97675
MICA	83	0.692771	83	0.590361	aa_385T	0.080706
MICA	83	0.271084	83	0.373494	aa_385del	0.0717
MICA	83	0.728916	83	0.626506	aa_386G	0.0717
MICA	83	0.271084	83	0.373494	aa_386del	0.0717
MICA	83	0.728916	83	0.626506	aa_387S	0.0717
MICA	83	0.271084	83	0.373494	aa_387del	0.0717
MICA	83	0.728916	83	0.626506	aa_388T	0.0717
MICA	83	0.271084	83	0.373494	aa_388del	0.0717
MICA	83	0.728916	83	0.626506	aa_389E	0.0717
MICA	83	0.271084	83	0.373494	aa_389del	0.0717
MICA	83	0.271084	83	0.373494	aa_390del	0.0717
MICA	83	0.728916	83	0.626506	aa_390G	0.0717
MICA	83	0.668675	83	0.584337	aa_391A	0.21599
MICA	83	0.060241	83	0.0421687	aa_391T	0.346468
MICA	83	0.271084	83	0.373494	aa_391del	0.0717
MICA	83	0.728916	83	0.626506	aa_392X	0.0717
MICA	83	0.271084	83	0.373494	aa_392del	0.0717
MICB	83	1	83	0.993976	aa_11A	0.189862
MICB	83	0	83	0.0060241	aa_11T	0.189862
MICB	83	0.993976	83	0.993976	aa_55P	0.596269
MICB	83	0.0060241	83	0.0060241	aa_55S	0.596269
MICB	83	0.0120482	83	0.0060241	aa_64C	0.88061
MICB	83	0.987952	83	0.993976	aa_64R	0.88061
MICB	83	0.0963855	83	0.216867	aa_75N	0.00286
MICB	83	0.903614	83	0.783133	aa_75D	0.002862
MICB	83	0.746988	83	0.728916	aa_80K	0.610442
MICB	83	0.253012	83	0.271084	aa_80E	0.610442
MICB	83	0.0783133	83	0.0783133	aa_121M	0.925244
MICB	83	0.921687	83	0.921687	aa_121I	0.925244
MICB	83	0.253012	83	0.271084	aa_136N	0.610442
MICB	83	0.746988	83	0.728916	aa_136D	0.610442
MICB	83	0.0060241	83	0.0120482	aa_193X	0.62672
MICB	83	0.993976	83	0.987952	aa_193R	0.62672
MICB	83	0.993976	83	0.987952	aa_194Y	0.62672
MICB	83	0.0060241	83	0.0120482	aa_194del	0.62672
MICB	83	0.0060241	83	0.0120482	aa_195del	0.62672
MICB	83	0.993976	83	0.987952	aa_195L	0.62672
MICB	83	0.993976	83	0.987952	aa_196K	0.62672
MICB	83	0.0060241	83	0.0120482	aa_196del	0.62672
MICB	83	0.0060241	83	0.0120482	aa_197del	0.62672
[truncated: 448 more rows]

## Sheet: Covid-19+men vs Covid-19-women
Gene	N(Covid-19[-] women)	Frequency(Covid-19[-] women)	N(Covid-19[+] men)	Frequency(Covid-19[+] men)	aa_residue	P-value
HLA-A	50	0.46	50	0.47	aa_10L	0.917
HLA-A	50	0.54	50	0.53	aa_10V	0.917
HLA-A	50	0.17	50	0.09	aa_14L	0.0214
HLA-A	50	0.83	50	0.91	aa_14S	0.0214
HLA-A	50	0.23	50	0.25	aa_33S	0.919
HLA-A	50	0.15	50	0.13	aa_33Y	0.82
HLA-A	50	0.13	50	0.06	aa_33T	0.0188
HLA-A	50	0.49	50	0.56	aa_33F	0.128
HLA-A	50	0.99	50	0.99	aa_36V	0.931
HLA-A	50	0.01	50	0.01	aa_36M	0.931
HLA-A	50	0.04	50	0.05	aa_41S	0.945
HLA-A	50	0.96	50	0.95	aa_41R	0.945
HLA-A	50	1	50	0.99	aa_67Q	0.333
HLA-A	50	0	50	0.01	aa_67R	0.333
HLA-A	50	0.87	50	0.84	aa_68R	0.476
HLA-A	50	0.13	50	0.16	aa_68K	0.476
HLA-A	50	0.92	50	0.94	aa_80G	0.268
HLA-A	50	0.08	50	0.06	aa_80R	0.268
HLA-A	50	0.37	50	0.43	aa_86Q	0.388
HLA-A	50	0.11	50	0.09	aa_86R	0.445
HLA-A	50	0.25	50	0.25	aa_86G	0.681
HLA-A	50	0.19	50	0.2	aa_86E	0.939
HLA-A	50	0.08	50	0.03	aa_86L	0.0649
HLA-A	50	0.11	50	0.09	aa_87N	0.445
HLA-A	50	0.81	50	0.88	aa_87E	0.0852
HLA-A	50	0.08	50	0.03	aa_87Q	0.0649
HLA-A	50	0.81	50	0.8	aa_89R	0.939
HLA-A	50	0.19	50	0.2	aa_89G	0.939
HLA-A	50	0.44	50	0.45	aa_90K	0.67
HLA-A	50	0.56	50	0.55	aa_90N	0.67
HLA-A	50	0.13	50	0.16	aa_91M	0.476
HLA-A	50	0.87	50	0.84	aa_91V	0.476
HLA-A	50	0.74	50	0.74	aa_94H	0.943
HLA-A	50	0.26	50	0.26	aa_94Q	0.943
HLA-A	50	0.95	50	0.95	aa_97T	0.52
HLA-A	50	0.05	50	0.05	aa_97I	0.52
HLA-A	50	0.25	50	0.23	aa_98H	0.914
HLA-A	50	0.75	50	0.77	aa_98D	0.914
HLA-A	50	0.25	50	0.23	aa_100A	0.74
HLA-A	50	0.48	50	0.51	aa_100V	0.574
HLA-A	50	0.27	50	0.26	aa_100E	0.773
HLA-A	50	0.45	50	0.46	aa_101N	0.951
HLA-A	50	0.48	50	0.51	aa_101D	0.574
HLA-A	50	0.07	50	0.03	aa_101S	0.295
HLA-A	50	0.74	50	0.77	aa_103G	0.594
HLA-A	50	0.26	50	0.23	aa_103R	0.594
HLA-A	50	0.26	50	0.23	aa_104I	0.594
HLA-A	50	0.74	50	0.77	aa_104T	0.594
HLA-A	50	0.74	50	0.77	aa_105L	0.594
HLA-A	50	0.26	50	0.23	aa_105A	0.594
HLA-A	50	0.26	50	0.23	aa_106L	0.594
HLA-A	50	0.74	50	0.77	aa_106R	0.594
HLA-A	50	0.26	50	0.23	aa_107R	0.594
HLA-A	50	0.74	50	0.77	aa_107G	0.594
HLA-A	50	0.75	50	0.75	aa_114A	0.729
HLA-A	50	0.25	50	0.25	aa_114D	0.729
HLA-A	50	0.25	50	0.25	aa_119V	0.671
HLA-A	50	0.56	50	0.54	aa_119I	0.575
HLA-A	50	0.19	50	0.21	aa_119L	0.798
HLA-A	50	0.32	50	0.3	aa_121R	0.912
HLA-A	50	0.39	50	0.32	aa_121M	0.12
HLA-A	50	0.29	50	0.38	aa_121I	0.142
HLA-A	50	0.81	50	0.8	aa_123Y	0.938
HLA-A	50	0.19	50	0.2	aa_123F	0.938
HLA-A	50	0.7	50	0.71	aa_129S	0.88
HLA-A	50	0.3	50	0.29	aa_129P	0.88
HLA-A	50	0.25	50	0.26	aa_131W	0.568
HLA-A	50	0.75	50	0.74	aa_131G	0.568
HLA-A	50	0.04	50	0.03	aa_133L	0.691
HLA-A	50	0.96	50	0.97	aa_133F	0.691
HLA-A	50	0.04	50	0.04	aa_138E	0.799
HLA-A	50	0.45	50	0.47	aa_138H	0.589
HLA-A	50	0.35	50	0.4	aa_138R	0.45
HLA-A	50	0.16	50	0.09	aa_138Q	0.0639
HLA-A	50	0.45	50	0.46	aa_140Y	0.685
HLA-A	50	0.51	50	0.5	aa_140D	0.761
HLA-A	50	0.04	50	0.04	aa_140H	0.799
HLA-A	50	0.47	50	0.49	aa_151K	0.644
HLA-A	50	0.53	50	0.51	aa_151N	0.644
HLA-A	50	0.72	50	0.71	aa_166I	0.663
HLA-A	50	0.28	50	0.29	aa_166T	0.663
HLA-A	50	0.37	50	0.2	aa_168Q	0.000718
HLA-A	50	0.63	50	0.8	aa_168K	0.000718
HLA-A	50	0.28	50	0.29	aa_169H	0.663
HLA-A	50	0.72	50	0.71	aa_169R	0.663
HLA-A	50	0.93	50	0.96	aa_173A	0.42
HLA-A	50	0.07	50	0.04	aa_173T	0.42
HLA-A	50	0.87	50	0.84	aa_174A	0.476
HLA-A	50	0.13	50	0.16	aa_174V	0.476
HLA-A	50	0.7	50	0.84	aa_175H	0.00185
HLA-A	50	0.3	50	0.16	aa_175R	0.00185
HLA-A	50	0.65	50	0.58	aa_176V	0.24
HLA-A	50	0.18	50	0.21	aa_176A	0.389
HLA-A	50	0.01	50	0.03	aa_176R	0.486
HLA-A	50	0.03	50	0.01	aa_176W	0.309
HLA-A	50	0.13	50	0.17	aa_176E	0.419
HLA-A	50	0.61	50	0.53	aa_180L	0.169
HLA-A	50	0.17	50	0.22	aa_180Q	0.263
HLA-A	50	0.13	50	0.16	aa_180R	0.476
HLA-A	50	0.09	50	0.09	aa_180W	0.948
HLA-A	50	0.13	50	0.16	aa_182V	0.476
HLA-A	50	0.87	50	0.84	aa_182A	0.476
HLA-A	50	0.93	50	0.87	aa_185E	0.184
HLA-A	50	0.07	50	0.13	aa_185D	0.184
HLA-A	50	0.75	50	0.75	aa_187T	0.729
HLA-A	50	0.25	50	0.25	aa_187R	0.729
HLA-A	50	0.68	50	0.64	aa_190E	0.552
HLA-A	50	0.32	50	0.36	aa_190D	0.552
HLA-A	50	0.68	50	0.64	aa_191W	0.552
HLA-A	50	0.32	50	0.36	aa_191G	0.552
HLA-A	50	0.01	50	0.01	aa_195H	0.461
HLA-A	50	0.99	50	0.99	aa_195Y	0.461
HLA-A	50	0.57	50	0.63	aa_208P	0.422
HLA-A	50	0.43	50	0.37	aa_208A	0.422
HLA-A	50	0.01	50	0	aa_210R	0.393
HLA-A	50	0.98	50	0.98	aa_210K	0.906
HLA-A	50	0.01	50	0.02	aa_210del	0.53
HLA-A	50	0.99	50	0.98	aa_211T	0.53
HLA-A	50	0.01	50	0.02	aa_211del	0.53
HLA-A	50	0.01	50	0.02	aa_212del	0.53
HLA-A	50	0.99	50	0.98	aa_212H	0.53
HLA-A	50	0.99	50	0.98	aa_213M	0.53
HLA-A	50	0.01	50	0.02	aa_213del	0.53
HLA-A	50	0.01	50	0.02	aa_214del	0.53
HLA-A	50	0.99	50	0.98	aa_214T	0.53
HLA-A	50	0.99	50	0.98	aa_215H	0.53
HLA-A	50	0.01	50	0.02	aa_215del	0.53
HLA-A	50	0.01	50	0.02	aa_216del	0.53
HLA-A	50	0.99	50	0.98	aa_216H	0.53
HLA-A	50	0.49	50	0.4	aa_217A	0.204
HLA-A	50	0.5	50	0.58	aa_217P	0.272
HLA-A	50	0.01	50	0.02	aa_217del	0.53
HLA-A	50	0.01	50	0.02	aa_218del	0.53
HLA-A	50	0.5	50	0.58	aa_218I	0.272
HLA-A	50	0.49	50	0.4	aa_218V	0.204
HLA-A	50	0.99	50	0.98	aa_219S	0.53
HLA-A	50	0.01	50	0.02	aa_219del	0.53
HLA-A	50	0.99	50	0.98	aa_220D	0.53
HLA-A	50	0.01	50	0.02	aa_220del	0.53
HLA-A	50	0.01	50	0.02	aa_221del	0.53
HLA-A	50	0.99	50	0.98	aa_221H	0.53
HLA-A	50	0.01	50	0.02	aa_222del	0.53
HLA-A	50	0.99	50	0.98	aa_222E	0.53
HLA-A	50	0.99	50	0.98	aa_223A	0.53
HLA-A	50	0.01	50	0.02	aa_223del	0.53
HLA-A	50	0.01	50	0.02	aa_224del	0.53
HLA-A	50	0.99	50	0.98	aa_224T	0.53
HLA-A	50	0.99	50	0.98	aa_225L	0.53
HLA-A	50	0.01	50	0.02	aa_225del	0.53
HLA-A	50	0.01	50	0.02	aa_226del	0.53
HLA-A	50	0.99	50	0.98	aa_226R	0.53
HLA-A	50	0.01	50	0.02	aa_227del	0.53
HLA-A	50	0.99	50	0.98	aa_227C	0.53
HLA-A	50	0.01	50	0.02	aa_228del	0.53
HLA-A	50	0.99	50	0.98	aa_228W	0.53
HLA-A	50	0.99	50	0.98	aa_229A	0.53
HLA-A	50	0.01	50	0.02	aa_229del	0.53
HLA-A	50	0.01	50	0.02	aa_230del	0.53
HLA-A	50	0.99	50	0.98	aa_230L	0.53
HLA-A	50	0.49	50	0.4	aa_231S	0.204
HLA-A	50	0.01	50	0.02	aa_231del	0.53
HLA-A	50	0.5	50	0.58	aa_231G	0.272
HLA-A	50	0.99	50	0.98	aa_232F	0.53
HLA-A	50	0.01	50	0.02	aa_232del	0.53
HLA-A	50	0.99	50	0.98	aa_233Y	0.53
HLA-A	50	0.01	50	0.02	aa_233del	0.53
HLA-A	50	0.99	50	0.98	aa_234P	0.53
HLA-A	50	0.01	50	0.02	aa_234del	0.53
HLA-A	50	0.01	50	0.02	aa_235del	0.53
HLA-A	50	0.99	50	0.98	aa_235A	0.53
HLA-A	50	0.01	50	0.02	aa_236del	0.53
HLA-A	50	0.99	50	0.98	aa_236E	0.53
HLA-A	50	0.01	50	0.02	aa_237del	0.53
HLA-A	50	0.99	50	0.98	aa_237I	0.53
HLA-A	50	0.01	50	0.02	aa_238del	0.53
HLA-A	50	0.99	50	0.98	aa_238T	0.53
HLA-A	50	0.99	50	0.98	aa_239L	0.53
HLA-A	50	0.01	50	0.02	aa_239del	0.53
HLA-A	50	0.01	50	0.02	aa_240del	0.53
HLA-A	50	0.99	50	0.98	aa_240T	0.53
HLA-A	50	0.99	50	0.98	aa_241W	0.53
HLA-A	50	0.01	50	0.02	aa_241del	0.53
HLA-A	50	0.01	50	0.02	aa_242del	0.53
HLA-A	50	0.99	50	0.98	aa_242Q	0.53
HLA-A	50	0.99	50	0.98	aa_243R	0.53
HLA-A	50	0.01	50	0.02	aa_243del	0.53
HLA-A	50	0.01	50	0.02	aa_244del	0.53
HLA-A	50	0.99	50	0.98	aa_244D	0.53
HLA-A	50	0.99	50	0.98	aa_245G	0.53
HLA-A	50	0.01	50	0.02	aa_245del	0.53
HLA-A	50	0.01	50	0.02	aa_246del	0.53
HLA-A	50	0.99	50	0.98	aa_246E	0.53
HLA-A	50	0.01	50	0.02	aa_247del	0.53
HLA-A	50	0.99	50	0.98	aa_247D	0.53
HLA-A	50	0.99	50	0.98	aa_248Q	0.53
HLA-A	50	0.01	50	0.02	aa_248del	0.53
HLA-A	50	0.99	50	0.98	aa_249T	0.53
HLA-A	50	0.01	50	0.02	aa_249del	0.53
HLA-A	50	0.99	50	0.98	aa_253E	0.53
HLA-A	50	0.01	50	0.02	aa_253del	0.53
HLA-A	50	0.01	50	0.02	aa_254del	0.53
HLA-A	50	0.99	50	0.98	aa_254L	0.53
HLA-A	50	0.99	50	0.98	aa_255V	0.53
HLA-A	50	0.01	50	0.02	aa_255del	0.53
HLA-A	50	0.99	50	0.98	aa_256E	0.53
HLA-A	50	0.01	50	0.02	aa_256del	0.53
HLA-A	50	0.01	50	0.02	aa_257del	0.53
HLA-A	50	0.99	50	0.98	aa_257T	0.53
HLA-A	50	0.99	50	0.98	aa_258R	0.53
HLA-A	50	0.01	50	0.02	aa_258del	0.53
HLA-A	50	0.01	50	0.02	aa_259del	0.53
HLA-A	50	0.99	50	0.98	aa_259P	0.53
HLA-A	50	0.99	50	0.98	aa_260A	0.53
HLA-A	50	0.01	50	0.02	aa_260del	0.53
HLA-A	50	0.99	50	0.98	aa_261G	0.53
HLA-A	50	0.01	50	0.02	aa_261del	0.53
HLA-A	50	0.99	50	0.98	aa_262D	0.53
HLA-A	50	0.01	50	0.02	aa_262del	0.53
HLA-A	50	0.99	50	0.98	aa_263G	0.53
HLA-A	50	0.01	50	0.02	aa_263del	0.53
HLA-A	50	0.99	50	0.98	aa_264T	0.53
HLA-A	50	0.01	50	0.02	aa_264del	0.53
HLA-A	50	0.01	50	0.02	aa_265del	0.53
HLA-A	50	0.99	50	0.98	aa_265F	0.53
HLA-A	50	0.99	50	0.98	aa_266Q	0.53
HLA-A	50	0.01	50	0.02	aa_266del	0.53
HLA-A	50	0.99	50	0.98	aa_267K	0.53
HLA-A	50	0.01	50	0.02	aa_267del	0.53
HLA-A	50	0.01	50	0.02	aa_268del	0.53
HLA-A	50	0.99	50	0.98	aa_268W	0.53
HLA-A	50	0.03	50	0.05	aa_269V	0.694
HLA-A	50	0.96	50	0.93	aa_269A	0.507
HLA-A	50	0.01	50	0.02	aa_269del	0.53
HLA-A	50	0.01	50	0.02	aa_270del	0.53
HLA-A	50	0.21	50	0.11	aa_270S	0.0192
HLA-A	50	0.78	50	0.87	aa_270A	0.0384
HLA-A	50	0.99	50	0.98	aa_271V	0.53
HLA-A	50	0.01	50	0.02	aa_271del	0.53
HLA-A	50	0.01	50	0.02	aa_272del	0.53
HLA-A	50	0.99	50	0.98	aa_272V	0.53
HLA-A	50	0.99	50	0.98	aa_273V	0.53
HLA-A	50	0.01	50	0.02	aa_273del	0.53
HLA-A	50	0.01	50	0.02	aa_274del	0.53
HLA-A	50	0.99	50	0.98	aa_274P	0.53
HLA-A	50	0.01	50	0.02	aa_275del	0.53
HLA-A	50	0.99	50	0.98	aa_275S	0.53
HLA-A	50	0.01	50	0.02	aa_276del	0.53
HLA-A	50	0.99	50	0.98	aa_276G	0.53
HLA-A	50	0.51	50	0.41	aa_277Q	0.156
HLA-A	50	0.48	50	0.57	aa_277E	0.204
HLA-A	50	0.01	50	0.02	aa_277del	0.53
HLA-A	50	0.99	50	0.98	aa_278E	0.53
HLA-A	50	0.01	50	0.02	aa_278del	0.53
HLA-A	50	0.99	50	0.98	aa_279Q	0.53
HLA-A	50	0.01	50	0.02	aa_279del	0.53
HLA-A	50	0.01	50	0.02	aa_280del	0.53
HLA-A	50	0.99	50	0.98	aa_280R	0.53
HLA-A	50	0.99	50	0.98	aa_282T	0.53
HLA-A	50	0.01	50	0.02	aa_282D	0.53
HLA-A	50	0.01	50	0.02	aa_283del	0.53
HLA-A	50	0.99	50	0.98	aa_283C	0.53
HLA-A	50	0.01	50	0.02	aa_284del	0.53
HLA-A	50	0.99	50	0.98	aa_284H	0.53
HLA-A	50	0.99	50	0.98	aa_285V	0.53
HLA-A	50	0.01	50	0.02	aa_285del	0.53
HLA-A	50	0.01	50	0.02	aa_286del	0.53
HLA-A	50	0.99	50	0.98	aa_286Q	0.53
HLA-A	50	0.99	50	0.98	aa_287H	0.53
HLA-A	50	0.01	50	0.02	aa_287del	0.53
HLA-A	50	0.01	50	0.02	aa_288del	0.53
HLA-A	50	0.99	50	0.98	aa_288E	0.53
HLA-A	50	0.01	50	0.02	aa_289del	0.53
HLA-A	50	0.99	50	0.98	aa_289G	0.53
HLA-A	50	0.99	50	0.98	aa_290L	0.53
HLA-A	50	0.01	50	0.02	aa_290del	0.53
HLA-A	50	0.99	50	0.98	aa_292K	0.53
HLA-A	50	0.01	50	0.02	aa_292P	0.53
HLA-A	50	0.01	50	0.02	aa_294H	0.53
HLA-A	50	0.99	50	0.98	aa_294L	0.53
HLA-A	50	0.01	50	0.02	aa_295L	0.53
HLA-A	50	0.99	50	0.98	aa_295T	0.53
HLA-A	50	0.99	50	0.98	aa_296L	0.53
HLA-A	50	0.01	50	0.02	aa_296X	0.53
HLA-A	50	0.01	50	0.02	aa_297del	0.53
HLA-A	50	0.99	50	0.98	aa_297R	0.53
HLA-A	50	0.99	50	0.98	aa_298W	0.53
HLA-A	50	0.01	50	0.02	aa_298del	0.53
HLA-A	50	0.01	50	0.02	aa_299del	0.53
HLA-A	50	0.99	50	0.98	aa_299E	0.53
HLA-A	50	0.29	50	0.38	aa_300L	0.134
HLA-A	50	0.01	50	0.02	aa_300del	0.53
HLA-A	50	0.7	50	0.6	aa_300P	0.105
HLA-A	50	0.99	50	0.98	aa_301S	0.53
HLA-A	50	0.01	50	0.02	aa_301del	0.53
HLA-A	50	0.01	50	0.02	aa_302del	0.53
HLA-A	50	0.99	50	0.98	aa_302S	0.53
HLA-A	50	0.99	50	0.98	aa_303Q	0.53
HLA-A	50	0.01	50	0.02	aa_303del	0.53
HLA-A	50	0.99	50	0.98	aa_304P	0.53
HLA-A	50	0.01	50	0.02	aa_304del	0.53
HLA-A	50	0.99	50	0.98	aa_305T	0.53
HLA-A	50	0.01	50	0.02	aa_305del	0.53
HLA-A	50	0.19	50	0.2	aa_306V	0.939
HLA-A	50	0.8	50	0.78	aa_306I	0.782
HLA-A	50	0.01	50	0.02	aa_306del	0.53
HLA-A	50	0.01	50	0.02	aa_307del	0.53
HLA-A	50	0.09	50	0.03	aa_307H	0.0379
HLA-A	50	0.9	50	0.95	aa_307P	0.118
HLA-A	50	0.99	50	0.98	aa_308I	0.53
HLA-A	50	0.01	50	0.02	aa_308del	0.53
HLA-A	50	0.01	50	0.02	aa_309del	0.53
HLA-A	50	0.99	50	0.98	aa_309V	0.53
HLA-A	50	0.99	50	0.98	aa_310G	0.53
HLA-A	50	0.01	50	0.02	aa_310del	0.53
HLA-A	50	0.01	50	0.02	aa_311del	0.53
HLA-A	50	0.99	50	0.98	aa_311I	0.53
HLA-A	50	0.01	50	0.02	aa_312del	0.53
HLA-A	50	0.99	50	0.98	aa_312I	0.53
HLA-A	50	0.01	50	0.02	aa_313del	0.53
HLA-A	50	0.99	50	0.98	aa_313A	0.53
HLA-A	50	0.01	50	0.02	aa_314del	0.53
HLA-A	50	0.99	50	0.98	aa_314G	0.53
HLA-A	50	0.99	50	0.98	aa_315L	0.53
HLA-A	50	0.01	50	0.02	aa_315del	0.53
HLA-A	50	0.01	50	0.02	aa_316del	0.53
HLA-A	50	0.99	50	0.98	aa_316V	0.53
HLA-A	50	0.99	50	0.98	aa_317L	0.53
HLA-A	50	0.01	50	0.02	aa_317del	0.53
HLA-A	50	0.51	50	0.4	aa_318F	0.116
HLA-A	50	0.48	50	0.58	aa_318L	0.156
HLA-A	50	0.01	50	0.02	aa_318del	0.53
HLA-A	50	0.01	50	0.02	aa_319del	0.53
HLA-A	50	0.99	50	0.98	aa_319G	0.53
HLA-A	50	0.99	50	0.98	aa_320A	0.53
HLA-A	50	0.01	50	0.02	aa_320del	0.53
HLA-A	50	0.01	50	0.02	aa_321del	0.53
HLA-A	50	0.95	50	0.95	aa_321V	0.984
HLA-A	50	0.04	50	0.03	aa_321M	0.691
HLA-A	50	0.17	50	0.08	aa_322F	0.01
HLA-A	50	0.82	50	0.9	aa_322I	0.0265
HLA-A	50	0.01	50	0.02	aa_322del	0.53
HLA-A	50	0.23	50	0.11	aa_323A	0.00732
HLA-A	50	0.76	50	0.87	aa_323T	0.016
HLA-A	50	0.01	50	0.02	aa_323del	0.53
HLA-A	50	0.01	50	0.02	aa_324del	0.53
HLA-A	50	0.99	50	0.98	aa_324G	0.53
HLA-A	50	0.01	50	0.02	aa_325del	0.53
HLA-A	50	0.99	50	0.98	aa_325A	0.53
HLA-A	50	0.99	50	0.98	aa_326V	0.53
HLA-A	50	0.01	50	0.02	aa_326del	0.53
HLA-A	50	0.99	50	0.98	aa_327V	0.53
HLA-A	50	0.01	50	0.02	aa_327del	0.53
HLA-A	50	0.99	50	0.98	aa_328A	0.53
HLA-A	50	0.01	50	0.02	aa_328del	0.53
HLA-A	50	0.99	50	0.98	aa_329A	0.53
HLA-A	50	0.01	50	0.02	aa_329del	0.53
HLA-A	50	0.01	50	0.02	aa_330del	0.53
HLA-A	50	0.99	50	0.98	aa_330V	0.53
HLA-A	50	0.01	50	0.02	aa_331del	0.53
HLA-A	50	0.17	50	0.08	aa_331R	0.01
HLA-A	50	0.82	50	0.9	aa_331M	0.0265
HLA-A	50	0.01	50	0.02	aa_332del	0.53
HLA-A	50	0.99	50	0.98	aa_332W	0.53
HLA-A	50	0.01	50	0.02	aa_333del	0.53
HLA-A	50	0.99	50	0.98	aa_333R	0.53
HLA-A	50	0.01	50	0.02	aa_334del	0.53
HLA-A	50	0.99	50	0.98	aa_334R	0.53
HLA-A	50	0.01	50	0.02	aa_335del	0.53
HLA-A	50	0.19	50	0.2	aa_335N	0.939
HLA-A	50	0.8	50	0.78	aa_335K	0.782
HLA-A	50	0.01	50	0.02	aa_336del	0.53
HLA-A	50	0.99	50	0.98	aa_336S	0.53
HLA-A	50	0.01	50	0.02	aa_337del	0.53
HLA-A	50	0.99	50	0.98	aa_337S	0.53
HLA-A	50	0.01	50	0.02	aa_338del	0.53
HLA-A	50	0.99	50	0.98	aa_338D	0.53
HLA-A	50	0.99	50	0.98	aa_339R	0.53
HLA-A	50	0.01	50	0.02	aa_339del	0.53
HLA-A	50	0.01	50	0.02	aa_340del	0.53
HLA-A	50	0.99	50	0.98	aa_340K	0.53
HLA-A	50	0.01	50	0.02	aa_341del	0.53
HLA-A	50	0.99	50	0.98	aa_341G	0.53
HLA-A	50	0.99	50	0.98	aa_342G	0.53
HLA-A	50	0.01	50	0.02	aa_342del	0.53
HLA-A	50	0.01	50	0.02	aa_343del	0.53
HLA-A	50	0.99	50	0.98	aa_343S	0.53
HLA-A	50	0.99	50	0.98	aa_344Y	0.53
HLA-A	50	0.01	50	0.02	aa_344del	0.53
HLA-A	50	0.3	50	0.38	aa_345T	0.186
HLA-A	50	0.01	50	0.02	aa_345del	0.53
HLA-A	50	0.69	50	0.6	aa_345S	0.147
HLA-A	50	0.01	50	0.02	aa_346del	0.53
HLA-A	50	0.99	50	0.98	aa_346Q	0.53
HLA-A	50	0.99	50	0.98	aa_347A	0.53
HLA-A	50	0.01	50	0.02	aa_347del	0.53
HLA-A	50	0.01	50	0.02	aa_348del	0.53
HLA-A	50	0.99	50	0.98	aa_348A	0.53
HLA-A	50	0.99	50	0.98	aa_349S	0.53
HLA-A	50	0.01	50	0.02	aa_349del	0.53
HLA-A	50	0.99	50	0.98	aa_350S	0.53
HLA-A	50	0.01	50	0.02	aa_350del	0.53
HLA-A	50	0.99	50	0.98	aa_351D	0.53
HLA-A	50	0.01	50	0.02	aa_351del	0.53
HLA-A	50	0.01	50	0.02	aa_352del	0.53
HLA-A	50	0.99	50	0.98	aa_352S	0.53
HLA-A	50	0.01	50	0.02	aa_353del	0.53
HLA-A	50	0.99	50	0.98	aa_353A	0.53
HLA-A	50	0.99	50	0.98	aa_354Q	0.53
HLA-A	50	0.01	50	0.02	aa_354del	0.53
HLA-A	50	0.99	50	0.98	aa_355G	0.53
HLA-A	50	0.01	50	0.02	aa_355del	0.53
HLA-A	50	0.01	50	0.02	aa_356del	0.53
HLA-A	50	0.99	50	0.98	aa_356S	0.53
HLA-A	50	0.01	50	0.02	aa_357del	0.53
HLA-A	50	0.99	50	0.98	aa_357D	0.53
HLA-A	50	0.01	50	0.02	aa_358del	0.53
HLA-A	50	0.22	50	0.11	aa_358M	0.00872
HLA-A	50	0.77	50	0.87	aa_358V	0.0194
HLA-A	50	0.99	50	0.98	aa_359S	0.53
HLA-A	50	0.01	50	0.02	aa_359del	0.53
HLA-A	50	0.99	50	0.98	aa_360L	0.53
HLA-A	50	0.01	50	0.02	aa_360del	0.53
HLA-A	50	0.01	50	0.02	aa_361del	0.53
HLA-A	50	0.99	50	0.98	aa_361T	0.53
HLA-A	50	0.99	50	0.98	aa_362A	0.53
HLA-A	50	0.01	50	0.02	aa_362del	0.53
HLA-A	50	0.01	50	0.02	aa_363del	0.53
HLA-A	50	0.99	50	0.98	aa_363C	0.53
HLA-A	50	0.99	50	0.98	aa_364K	0.53
HLA-A	50	0.01	50	0.02	aa_364del	0.53
HLA-A	50	0.99	50	0.98	aa_365V	0.53
HLA-A	50	0.01	50	0.02	aa_365del	0.53
HLA-A	50	0.01	50	0.02	aa_366del	0.53
HLA-A	50	0.99	50	0.98	aa_366X	0.53
HLA-B	50	0.76	50	0.71	aa_2R	0.384
HLA-B	50	0.24	50	0.29	aa_2L	0.384
HLA-B	50	0.24	50	0.29	aa_4M	0.384
HLA-B	50	0.76	50	0.71	aa_4T	0.384
HLA-B	50	0.7	50	0.74	aa_9V	0.533
HLA-B	50	0.3	50	0.26	aa_9L	0.533
HLA-B	50	0.59	50	0.56	aa_14W	0.813
HLA-B	50	0.41	50	0.44	aa_14S	0.813
HLA-B	50	0.39	50	0.38	aa_15A	0.81
HLA-B	50	0.61	50	0.62	aa_15G	0.81
HLA-B	50	0.42	50	0.45	aa_17L	0.826
HLA-B	50	0.58	50	0.55	aa_17V	0.826
HLA-B	50	0.25	50	0.21	aa_33H	0.474
HLA-B	50	0.06	50	0.09	aa_33D	0.371
HLA-B	50	0.69	50	0.7	aa_33Y	0.884
HLA-B	50	0.76	50	0.7	aa_35A	0.261
HLA-B	50	0.24	50	0.3	aa_35S	0.261
HLA-B	50	0.28	50	0.32	aa_36V	0.455
HLA-B	50	0.72	50	0.68	aa_36M	0.455
HLA-B	50	0.31	50	0.4	aa_48S	0.208
HLA-B	50	0.32	50	0.35	aa_48A	0.577
HLA-B	50	0.37	50	0.25	aa_48T	0.0409
HLA-B	50	0.06	50	0.05	aa_54G	0.902
HLA-B	50	0.94	50	0.95	aa_54D	0.902
HLA-B	50	0.65	50	0.76	aa_56Q	0.0578
HLA-B	50	0.35	50	0.24	aa_56L	0.0578
HLA-B	50	0.36	50	0.22	aa_65T	0.0136
HLA-B	50	0.64	50	0.78	aa_65A	0.0136
HLA-B	50	0.32	50	0.36	aa_69T	0.399
HLA-B	50	0.34	50	0.21	aa_69K	0.02
HLA-B	50	0.26	50	0.34	aa_69E	0.207
HLA-B	50	0.08	50	0.09	aa_69M	0.873
HLA-B	50	0.08	50	0.09	aa_70A	0.873
HLA-B	50	0.92	50	0.91	aa_70E	0.873
HLA-B	50	0.95	50	0.97	aa_86R	0.453
HLA-B	50	0.05	50	0.03	aa_86G	0.453
HLA-B	50	0.46	50	0.43	aa_87E	0.453
HLA-B	50	0.54	50	0.57	aa_87N	0.453
HLA-B	50	0.05	50	0.05	aa_89R	0.951
HLA-B	50	0.95	50	0.95	aa_89Q	0.951
HLA-B	50	0.95	50	0.95	aa_90I	0.951
HLA-B	50	0.05	50	0.05	aa_90N	0.951
HLA-B	50	0.3	50	0.34	aa_91F	0.402
HLA-B	50	0.14	50	0.11	aa_91C	0.453
HLA-B	50	0.06	50	0.1	aa_91Y	0.284
HLA-B	50	0.05	50	0.05	aa_91M	0.951
HLA-B	50	0.45	50	0.4	aa_91S	0.338
HLA-B	50	0.12	50	0.18	aa_93A	0.254
HLA-B	50	0.88	50	0.82	aa_93T	0.254
HLA-B	50	0.06	50	0.1	aa_94Q	0.284
HLA-B	50	0.05	50	0.05	aa_94S	0.951
HLA-B	50	0.01	50	0.03	aa_94K	0.229
HLA-B	50	0.88	50	0.82	aa_94N	0.254
HLA-B	50	0.12	50	0.18	aa_95A	0.254
HLA-B	50	0.88	50	0.82	aa_95T	0.254
HLA-B	50	0.22	50	0.26	aa_98D	0.471
HLA-B	50	0.78	50	0.74	aa_98Y	0.471
HLA-B	50	0.55	50	0.59	aa_101S	0.443
HLA-B	50	0.02	50	0.06	aa_101D	0.134
HLA-B	50	0.43	50	0.35	aa_101N	0.17
HLA-B	50	0.21	50	0.18	aa_104T	0.537
HLA-B	50	0.24	50	0.22	aa_104I	0.641
HLA-B	50	0.55	50	0.6	aa_104N	0.369
HLA-B	50	0.43	50	0.34	aa_105A	0.132
HLA-B	50	0.57	50	0.66	aa_105L	0.132
HLA-B	50	0.45	50	0.4	aa_106L	0.369
HLA-B	50	0.55	50	0.6	aa_106R	0.369
HLA-B	50	0.45	50	0.4	aa_107R	0.369
HLA-B	50	0.55	50	0.6	aa_107G	0.369
HLA-B	50	0.62	50	0.65	aa_118T	0.729
HLA-B	50	0.38	50	0.35	aa_118I	0.729
HLA-B	50	0.37	50	0.43	aa_119L	0.465
HLA-B	50	0.39	50	0.39	aa_119I	0.966
HLA-B	50	0.24	50	0.18	aa_119W	0.282
HLA-B	50	0.13	50	0.12	aa_121T	0.87
HLA-B	50	0.01	50	0.03	aa_121N	0.229
HLA-B	50	0.04	50	0.04	aa_121W	0.875
HLA-B	50	0.64	50	0.6	aa_121R	0.482
HLA-B	50	0.14	50	0.18	aa_121S	0.355
HLA-B	50	0.04	50	0.03	aa_121V	0.689
HLA-B	50	0.99	50	1	aa_122M	0.452
HLA-B	50	0.01	50	0	aa_122T	0.452
HLA-B	50	0.01	50	0.04	aa_123S	0.202
HLA-B	50	0.99	50	0.95	aa_123Y	0.136
HLA-B	50	0	50	0.01	aa_123F	0.454
HLA-B	50	0.7	50	0.73	aa_127V	0.744
HLA-B	50	0.3	50	0.27	aa_127L	0.744
HLA-B	50	0.04	50	0.02	aa_133F	0.642
HLA-B	50	0.96	50	0.98	aa_133L	0.642
HLA-B	50	0.67	50	0.7	aa_137H	0.516
HLA-B	50	0.33	50	0.3	aa_137Y	0.516
HLA-B	50	0.53	50	0.47	aa_138N	0.317
HLA-B	50	0.46	50	0.48	aa_138D	0.721
HLA-B	50	0.01	50	0.05	aa_138H	0.0743
HLA-B	50	0.24	50	0.23	aa_140S	0.975
HLA-B	50	0.17	50	0.17	aa_140D	0.968
HLA-B	50	0.31	50	0.35	aa_140Y	0.556
HLA-B	50	0.13	50	0.07	aa_140L	0.106
HLA-B	50	0.15	50	0.18	aa_140F	0.589
HLA-B	50	0.82	50	0.78	aa_155S	0.528
HLA-B	50	0.18	50	0.22	aa_155R	0.528
HLA-B	50	0.04	50	0.03	aa_167S	0.532
HLA-B	50	0.96	50	0.97	aa_167T	0.532
HLA-B	50	0.02	50	0.01	aa_169L	0.527
HLA-B	50	0.98	50	0.99	aa_169R	0.527
HLA-B	50	0.04	50	0.03	aa_171L	0.532
HLA-B	50	0.96	50	0.97	aa_171W	0.532
HLA-B	50	0.73	50	0.69	aa_176V	0.667
HLA-B	50	0.27	50	0.31	aa_176E	0.667
HLA-B	50	0.07	50	0.09	aa_180R	0.508
HLA-B	50	0.17	50	0.22	aa_180D	0.397
HLA-B	50	0.02	50	0.03	aa_180W	0.696
HLA-B	50	0.74	50	0.66	aa_180L	0.176
HLA-B	50	0.91	50	0.95	aa_182A	0.33
HLA-B	50	0.09	50	0.05	aa_182T	0.33
HLA-B	50	1	50	0.99	aa_186G	0.454
HLA-B	50	0	50	0.01	aa_186D	0.454
HLA-B	50	0.13	50	0.15	aa_187E	0.678
HLA-B	50	0.58	50	0.56	aa_187L	0.749
HLA-B	50	0.29	50	0.29	aa_187T	0.967
HLA-B	50	0.8	50	0.86	aa_191W	0.233
HLA-B	50	0.2	50	0.14	aa_191S	0.233
HLA-B	50	0.82	50	0.82	aa_195Y	0.959
HLA-B	50	0.18	50	0.18	aa_195H	0.959
HLA-B	50	0.16	50	0.22	aa_201D	0.318
HLA-B	50	0.84	50	0.78	aa_201E	0.318
HLA-B	50	0.08	50	0.11	aa_202K	0.477
HLA-B	50	0.92	50	0.89	aa_202T	0.477
HLA-B	50	0.16	50	0.22	aa_204E	0.318
HLA-B	50	0.84	50	0.78	aa_204Q	0.318
HLA-B	50	0.75	50	0.71	aa_218I	0.462
HLA-B	50	0.25	50	0.29	aa_218V	0.462
HLA-B	50	0.86	50	0.89	aa_223A	0.394
HLA-B	50	0.14	50	0.11	aa_223V	0.394
HLA-B	50	0.45	50	0.52	aa_306I	0.28
HLA-B	50	0.55	50	0.48	aa_306V	0.28
HLA-B	50	0.45	50	0.51	aa_329T	0.354
HLA-B	50	0.55	50	0.49	aa_329A	0.354
HLA-B	50	0.58	50	0.6	aa_349S	0.729
HLA-B	50	0.42	50	0.4	aa_349C	0.729
HLA-C	50	0.99	50	0.98	aa_7R	0.568
HLA-C	50	0.01	50	0.02	aa_7Q	0.568
HLA-C	50	0.23	50	0.27	aa_8A	0.523
HLA-C	50	0.77	50	0.73	aa_8T	0.523
HLA-C	50	0.67	50	0.64	aa_10I	0.657
HLA-C	50	0.33	50	0.36	aa_10L	0.657
HLA-C	50	0.78	50	0.75	aa_16A	0.633
HLA-C	50	0.22	50	0.25	aa_16G	0.633
HLA-C	50	0.99	50	0.98	aa_20T	0.568
HLA-C	50	0.01	50	0.02	aa_20I	0.568
HLA-C	50	0.71	50	0.68	aa_25C	0.661
HLA-C	50	0.29	50	0.32	aa_25G	0.661
HLA-C	50	0.99	50	0.98	aa_30R	0.507
HLA-C	50	0.01	50	0.02	aa_30K	0.507
HLA-C	50	0.47	50	0.42	aa_33Y	0.304
HLA-C	50	0.21	50	0.23	aa_33S	0.572
HLA-C	50	0.31	50	0.33	aa_33D	0.74
HLA-C	50	0.01	50	0.02	aa_33F	0.507
HLA-C	50	0.78	50	0.75	aa_35A	0.486
HLA-C	50	0.22	50	0.25	aa_35S	0.486
HLA-C	50	0.8	50	0.79	aa_38R	0.712
HLA-C	50	0.2	50	0.21	aa_38W	0.712
HLA-C	50	0.07	50	0.05	aa_40S	0.695
HLA-C	50	0.93	50	0.95	aa_40G	0.695
HLA-C	50	0.82	50	0.82	aa_45R	0.831
HLA-C	50	0.18	50	0.18	aa_45H	0.831
HLA-C	50	0.68	50	0.65	aa_48A	0.612
HLA-C	50	0.32	50	0.35	aa_48S	0.612
HLA-C	50	0.86	50	0.9	aa_59R	0.258
HLA-C	50	0.14	50	0.1	aa_59Q	0.258
HLA-C	50	0.8	50	0.79	aa_73A	0.712
HLA-C	50	0.2	50	0.21	aa_73E	0.712
HLA-C	50	0.81	50	0.81	aa_90K	0.937
HLA-C	50	0.19	50	0.19	aa_90N	0.937
HLA-C	50	0.39	50	0.38	aa_97T	0.677
HLA-C	50	0.61	50	0.62	aa_97A	0.677
HLA-C	50	0.48	50	0.49	aa_101N	0.77
HLA-C	50	0.52	50	0.51	aa_101S	0.77
HLA-C	50	0.52	50	0.51	aa_104N	0.77
HLA-C	50	0.48	50	0.49	aa_104K	0.77
HLA-C	50	0.51	50	0.54	aa_114D	0.504
HLA-C	50	0.49	50	0.46	aa_114A	0.504
HLA-C	50	0.02	50	0.03	aa_115R	0.545
HLA-C	50	0.98	50	0.97	aa_115G	0.545
HLA-C	50	0.89	50	0.87	aa_118T	0.959
HLA-C	50	0.11	50	0.13	aa_118I	0.959
HLA-C	50	0	50	0.01	aa_119F	0.342
HLA-C	50	0.89	50	0.85	aa_119L	0.622
HLA-C	50	0.11	50	0.14	aa_119I	0.761
HLA-C	50	0.75	50	0.77	aa_121R	0.879
HLA-C	50	0.25	50	0.23	aa_121W	0.879
HLA-C	50	0.21	50	0.24	aa_123F	0.505
HLA-C	50	0.72	50	0.66	aa_123Y	0.271
HLA-C	50	0.01	50	0.02	aa_123C	0.507
HLA-C	50	0.06	50	0.08	aa_123S	0.527
HLA-C	50	0.92	50	0.91	aa_127L	0.967
HLA-C	50	0.08	50	0.09	aa_127V	0.967
HLA-C	50	0.03	50	0.04	aa_137H	0.882
HLA-C	50	0.97	50	0.96	aa_137Y	0.882
HLA-C	50	0.35	50	0.34	aa_138N	0.867
HLA-C	50	0.65	50	0.66	aa_138D	0.867
HLA-C	50	0.35	50	0.36	aa_140F	0.907
HLA-C	50	0.03	50	0.03	aa_140L	0.786
HLA-C	50	0.08	50	0.1	aa_140Y	0.739
HLA-C	50	0.54	50	0.51	aa_140S	0.848
HLA-C	50	0.87	50	0.9	aa_162T	0.349
HLA-C	50	0.13	50	0.1	aa_162K	0.349
HLA-C	50	0.01	50	0.02	aa_167S	0.568
HLA-C	50	0.99	50	0.98	aa_167T	0.568
HLA-C	50	0.23	50	0.26	aa_171L	0.597
HLA-C	50	0.77	50	0.74	aa_171W	0.597
HLA-C	50	0.72	50	0.7	aa_176E	0.719
HLA-C	50	0.01	50	0	aa_176T	0.361
HLA-C	50	0.27	50	0.3	aa_176A	0.615
HLA-C	50	0.35	50	0.38	aa_180L	0.831
HLA-C	50	0	50	0.01	aa_180D	0.342
HLA-C	50	0.35	50	0.35	aa_180R	0.977
HLA-C	50	0.25	50	0.19	aa_180W	0.426
HLA-C	50	0.05	50	0.07	aa_180Q	0.531
HLA-C	50	0.84	50	0.84	aa_187T	0.931
HLA-C	50	0.08	50	0.09	aa_187L	0.967
HLA-C	50	0.08	50	0.07	aa_187E	0.934
HLA-C	50	0.99	50	0.98	aa_194R	0.568
HLA-C	50	0.01	50	0.02	aa_194G	0.568
HLA-C	50	0.08	50	0.09	aa_197K	0.967
HLA-C	50	0.92	50	0.91	aa_197E	0.967
HLA-C	50	0.01	50	0	aa_199R	0.361
HLA-C	50	0.99	50	1	aa_199G	0.361
HLA-C	50	0.86	50	0.89	aa_201E	0.367
HLA-C	50	0.14	50	0.11	aa_201K	0.367
HLA-C	50	0.01	50	0	aa_207D	0.416
HLA-C	50	0.99	50	1	aa_207E	0.416
HLA-C	50	0.22	50	0.24	aa_208P	0.713
HLA-C	50	0.01	50	0.02	aa_208R	0.568
HLA-C	50	0.77	50	0.74	aa_208H	0.597
HLA-C	50	0.95	50	0.94	aa_217P	0.743
HLA-C	50	0.05	50	0.06	aa_217L	0.743
HLA-C	50	0.78	50	0.76	aa_218V	0.713
HLA-C	50	0.22	50	0.24	aa_218L	0.713
HLA-C	50	0.07	50	0.05	aa_235T	0.695
HLA-C	50	0.93	50	0.95	aa_235A	0.695
HLA-C	50	0.29	50	0.34	aa_243W	0.462
HLA-C	50	0.71	50	0.66	aa_243R	0.462
HLA-C	50	0.01	50	0	aa_253Q	0.417
HLA-C	50	0.99	50	1	aa_253E	0.417
HLA-C	50	0.01	50	0.02	aa_272M	0.507
HLA-C	50	0.99	50	0.98	aa_272V	0.507
HLA-C	50	0.77	50	0.74	aa_277E	0.597
HLA-C	50	0.23	50	0.26	aa_277Q	0.597
HLA-C	50	0.22	50	0.24	aa_285M	0.713
HLA-C	50	0.78	50	0.76	aa_285V	0.713
HLA-C	50	0.24	50	0.26	aa_291Q	0.718
HLA-C	50	0.76	50	0.74	aa_291P	0.718
HLA-C	50	0.01	50	0.02	aa_294C	0.568
HLA-C	50	0.99	50	0.98	aa_294L	0.568
HLA-C	50	0.78	50	0.76	aa_297R	0.713
HLA-C	50	0.22	50	0.24	aa_297S	0.713
HLA-C	50	0.21	50	0.24	aa_299K	0.526
HLA-C	50	0.14	50	0.1	aa_299G	0.258
HLA-C	50	0.65	50	0.66	aa_299E	0.867
HLA-C	50	0.99	50	0.98	aa_308I	0.568
HLA-C	50	0.01	50	0.02	aa_308N	0.568
HLA-C	50	0.77	50	0.74	aa_309V	0.597
HLA-C	50	0.22	50	0.24	aa_309M	0.713
HLA-C	50	0.01	50	0.02	aa_309L	0.568
HLA-C	50	0.99	50	0.98	aa_313A	0.568
HLA-C	50	0.01	50	0.02	aa_313S	0.568
HLA-C	50	0.01	50	0.02	aa_315P	0.568
HLA-C	50	0.99	50	0.98	aa_315del	0.568
HLA-C	50	0.01	50	0.02	aa_316A	0.568
HLA-C	50	0.99	50	0.98	aa_316del	0.568
HLA-C	50	0.99	50	0.98	aa_317del	0.568
HLA-C	50	0.01	50	0.02	aa_317V	0.568
HLA-C	50	0.01	50	0.02	aa_318L	0.568
HLA-C	50	0.99	50	0.98	aa_318del	0.568
HLA-C	50	0.99	50	0.98	aa_319del	0.568
HLA-C	50	0.01	50	0.02	aa_319A	0.568
HLA-C	50	0.99	50	0.98	aa_320del	0.568
HLA-C	50	0.01	50	0.02	aa_320V	0.568
HLA-C	50	0.78	50	0.76	aa_325A	0.713
HLA-C	50	0.22	50	0.24	aa_325V	0.713
HLA-C	50	0.2	50	0.21	aa_333M	0.712
HLA-C	50	0.8	50	0.79	aa_333V	0.712
HLA-C	50	0.35	50	0.28	aa_334M	0.197
HLA-C	50	0.65	50	0.72	aa_334V	0.197
HLA-C	50	0.78	50	0.76	aa_335A	0.713
HLA-C	50	0.22	50	0.24	aa_335T	0.713
HLA-C	50	0.77	50	0.74	aa_336V	0.597
HLA-C	50	0.23	50	0.26	aa_336A	0.597
HLA-C	50	0.22	50	0.24	aa_337M	0.713
HLA-C	50	0.78	50	0.76	aa_337V	0.713
HLA-C	50	0.01	50	0.02	aa_338I	0.568
HLA-C	50	0.99	50	0.98	aa_338M	0.568
HLA-C	50	0.01	50	0.02	aa_339H	0.568
HLA-C	50	0.99	50	0.98	aa_339C	0.568
HLA-C	50	0.78	50	0.76	aa_356S	0.713
HLA-C	50	0.22	50	0.24	aa_356C	0.713
HLA-C	50	0.78	50	0.75	aa_369A	0.588
HLA-C	50	0.22	50	0.25	aa_369T	0.588
HLA-DMA	50	0.84	50	0.86	aa_166V	0.683
HLA-DMA	50	0.16	50	0.14	aa_166I	0.683
HLA-DMA	50	0.99	50	0.99	aa_181G	0.92
HLA-DMA	50	0.01	50	0.01	aa_181A	0.92
HLA-DMA	50	0.04	50	0.03	aa_210C	0.822
HLA-DMA	50	0.95	50	0.96	aa_210R	0.881
HLA-DMA	50	0.01	50	0.01	aa_210H	0.92
HLA-DMB	50	0.01	50	0.01	aa_28A	0.92
HLA-DMB	50	0.99	50	0.99	aa_28T	0.92
HLA-DMB	50	0.01	50	0.01	aa_49V	0.92
HLA-DMB	50	0.99	50	0.99	aa_49D	0.92
HLA-DMB	50	0.01	50	0.01	aa_71N	0.92
HLA-DMB	50	0.99	50	0.99	aa_71S	0.92
HLA-DMB	50	0.96	50	0.94	aa_162A	0.362
HLA-DMB	50	0.02	50	0.02	aa_162V	0.862
HLA-DMB	50	0.02	50	0.04	aa_162E	0.319
HLA-DMB	50	0.2	50	0.25	aa_197T	0.398
HLA-DMB	50	0.8	50	0.75	aa_197I	0.398
HLA-DOA	50	0.01	50	0	aa_139L	0.349
HLA-DOA	50	0.99	50	1	aa_139F	0.349
HLA-DOA	50	0	50	0.01	aa_175R	0.251
HLA-DOA	50	1	50	0.99	aa_175H	0.251
HLA-DOA	50	0	50	0.02	aa_231V	0.203
HLA-DOA	50	1	50	0.98	aa_231G	0.203
HLA-DOB	50	1	50	0.99	aa_7P	0.2
HLA-DOB	50	0	50	0.01	aa_7A	0.2
HLA-DOB	50	0.99	50	0.98	aa_18R	0.548
HLA-DOB	50	0.01	50	0.02	aa_18Q	0.548
HLA-DOB	50	0.04	50	0.02	aa_210I	0.512
HLA-DOB	50	0.96	50	0.98	aa_210V	0.512
HLA-DOB	50	0.94	50	0.93	aa_234L	0.707
HLA-DOB	50	0.06	50	0.07	aa_234F	0.707
HLA-DOB	50	0.94	50	0.9	aa_244V	0.263
HLA-DOB	50	0.06	50	0.1	aa_244I	0.263
HLA-DPA1	50	0.04	50	0.07	aa_42M	0.481
HLA-DPA1	50	0.96	50	0.93	aa_42A	0.481
HLA-DPA1	50	0.99	50	1	aa_59E	0.349
HLA-DPA1	50	0.01	50	0	aa_59D	0.349
HLA-DPA1	50	0.19	50	0.26	aa_62Q	0.263
HLA-DPA1	50	0.81	50	0.74	aa_62M	0.263
HLA-DPA1	50	0.81	50	0.74	aa_81Q	0.263
HLA-DPA1	50	0.19	50	0.26	aa_81R	0.263
HLA-DPA1	50	0	50	0.01	aa_89D	0.262
HLA-DPA1	50	1	50	0.99	aa_89G	0.262
HLA-DPA1	50	0.99	50	1	aa_97L	0.361
HLA-DPA1	50	0.01	50	0	aa_97S	0.361
HLA-DPA1	50	0.81	50	0.74	aa_114T	0.263
HLA-DPA1	50	0.19	50	0.26	aa_114A	0.263
HLA-DPA1	50	1	50	0.99	aa_122V	0.371
HLA-DPA1	50	0	50	0.01	aa_122M	0.371
HLA-DPA1	50	0.81	50	0.74	aa_142K	0.263
HLA-DPA1	50	0.19	50	0.26	aa_142R	0.263
HLA-DPA1	50	0.19	50	0.26	aa_158P	0.263
HLA-DPA1	50	0.81	50	0.74	aa_158L	0.263
HLA-DPA1	50	0.19	50	0.26	aa_191V	0.263
HLA-DPA1	50	0.81	50	0.74	aa_191F	0.263
HLA-DPA1	50	0.81	50	0.74	aa_259T	0.263
HLA-DPA1	50	0.19	50	0.26	aa_259P	0.263
HLA-DPB1	50	0.67	50	0.69	aa_37L	0.637
HLA-DPB1	50	0.33	50	0.31	aa_37V	0.637
HLA-DPB1	50	0.67	50	0.69	aa_38F	0.637
HLA-DPB1	50	0.09	50	0.07	aa_38H	0.628
HLA-DPB1	50	0.24	50	0.24	aa_38Y	0.883
HLA-DPB1	50	0.26	50	0.21	aa_40L	0.467
HLA-DPB1	50	0.74	50	0.79	aa_40G	0.467
HLA-DPB1	50	0.97	50	0.99	aa_62E	0.297
HLA-DPB1	50	0.03	50	0.01	aa_62Q	0.297
HLA-DPB1	50	0.86	50	0.83	aa_64F	0.792
HLA-DPB1	50	0.03	50	0.01	aa_64L	0.248
HLA-DPB1	50	0.11	50	0.16	aa_64Y	0.431
HLA-DPB1	50	0.41	50	0.56	aa_65A	0.0441
HLA-DPB1	50	0.59	50	0.44	aa_65V	0.0441
HLA-DPB1	50	0.56	50	0.43	aa_84D	0.0935
HLA-DPB1	50	0.41	50	0.56	aa_84A	0.0441
HLA-DPB1	50	0.03	50	0.01	aa_84E	0.248
HLA-DPB1	50	0.44	50	0.57	aa_85A	0.0935
HLA-DPB1	50	0.56	50	0.43	aa_85E	0.0935
HLA-DPB1	50	0.79	50	0.86	aa_86E	0.195
HLA-DPB1	50	0.21	50	0.14	aa_86D	0.195
HLA-DPB1	50	0.22	50	0.12	aa_94L	0.0625
HLA-DPB1	50	0.78	50	0.88	aa_94I	0.0625
HLA-DPB1	50	0.69	50	0.68	aa_98K	0.901
HLA-DPB1	50	0.28	50	0.31	aa_98E	0.668
HLA-DPB1	50	0.03	50	0.01	aa_98R	0.297
HLA-DPB1	50	0.76	50	0.73	aa_105M	0.684
HLA-DPB1	50	0.21	50	0.22	aa_105V	0.979
HLA-DPB1	50	0.03	50	0.05	aa_105I	0.407
HLA-DPB1	50	0.66	50	0.69	aa_113G	0.525
HLA-DPB1	50	0.32	50	0.31	aa_113D	0.811
HLA-DPB1	50	0.02	50	0	aa_113V	0.142
HLA-DPB1	50	0.32	50	0.31	aa_114E	0.811
HLA-DPB1	50	0.68	50	0.69	aa_114G	0.811
HLA-DPB1	50	0.68	50	0.69	aa_115P	0.811
HLA-DPB1	50	0.32	50	0.31	aa_115A	0.811
HLA-DPB1	50	0.68	50	0.69	aa_116M	0.811
HLA-DPB1	50	0.32	50	0.31	aa_116V	0.811
HLA-DPB1	50	0.29	50	0.28	aa_125K	0.819
HLA-DPB1	50	0.71	50	0.72	aa_125R	0.819
HLA-DPB1	50	0.69	50	0.72	aa_199T	0.533
HLA-DPB1	50	0.31	50	0.28	aa_199I	0.533
HLA-DPB1	50	0.16	50	0.09	aa_207M	0.176
HLA-DPB1	50	0.84	50	0.91	aa_207L	0.176
HLA-DPB1	50	0.95	50	0.9	aa_223R	0.327
HLA-DPB1	50	0.05	50	0.1	aa_223Q	0.327
HLA-DPB1	50	0.95	50	0.98	aa_234V	0.288
HLA-DPB1	50	0.05	50	0.02	aa_234M	0.288
HLA-DPB1	50	0.02	50	0	aa_244T	0.142
HLA-DPB1	50	0.98	50	1	aa_244I	0.142
HLA-DRA	50	0.99	50	1	aa_16V	0.309
HLA-DRA	50	0.01	50	0	aa_16L	0.309
HLA-DRA	50	0.75	50	0.73	aa_242V	0.836
HLA-DRA	50	0.25	50	0.27	aa_242L	0.836
HLA-DRB1	50	0.48	50	0.58	aa_5K	0.174
HLA-DRB1	50	0.52	50	0.42	aa_5R	0.174
HLA-DRB1	50	0.85	50	0.87	aa_6L	0.727
HLA-DRB1	50	0.15	50	0.13	aa_6F	0.727
HLA-DRB1	50	0.17	50	0.29	aa_13T	0.0938
HLA-DRB1	50	0.83	50	0.71	aa_13A	0.0938
HLA-DRB1	50	0.48	50	0.58	aa_14A	0.174
HLA-DRB1	50	0.52	50	0.42	aa_14V	0.174
HLA-DRB1	50	0.08	50	0.09	aa_29S	0.893
HLA-DRB1	50	0.92	50	0.91	aa_29A	0.893
HLA-DRB1	50	0.16	50	0.16	aa_33Q	0.888
HLA-DRB1	50	0.84	50	0.84	aa_33R	0.888
HLA-DRB1	50	0.67	50	0.55	aa_39E	0.0834
HLA-DRB1	50	0.01	50	0.04	aa_39K	0.178
HLA-DRB1	50	0.32	50	0.41	aa_39W	0.224
HLA-DRB1	50	0.01	50	0.03	aa_40E	0.282
HLA-DRB1	50	0.48	50	0.58	aa_40Q	0.174
HLA-DRB1	50	0.51	50	0.39	aa_40Y	0.0976
HLA-DRB1	50	0.07	50	0.17	aa_41L	0.0755
HLA-DRB1	50	0.15	50	0.12	aa_41G	0.655
HLA-DRB1	50	0.01	50	0.04	aa_41D	0.178
HLA-DRB1	50	0.51	50	0.39	aa_41S	0.0976
HLA-DRB1	50	0.1	50	0.12	aa_41P	0.728
HLA-DRB1	50	0.16	50	0.16	aa_41V	0.955
HLA-DRB1	50	0.51	50	0.39	aa_42T	0.0976
HLA-DRB1	50	0.49	50	0.61	aa_42K	0.0976
HLA-DRB1	50	0.03	50	0.06	aa_43G	0.389
HLA-DRB1	50	0.09	50	0.24	aa_43F	0.00998
HLA-DRB1	50	0.15	50	0.12	aa_43Y	0.655
HLA-DRB1	50	0.15	50	0.13	aa_43H	0.727
HLA-DRB1	50	0.48	50	0.33	aa_43S	0.0392
HLA-DRB1	50	0.1	50	0.12	aa_43R	0.728
HLA-DRB1	50	0.85	50	0.88	aa_44E	0.655
HLA-DRB1	50	0.15	50	0.12	aa_44K	0.655
HLA-DRB1	50	0.97	50	0.94	aa_46H	0.389
HLA-DRB1	50	0.03	50	0.06	aa_46Y	0.389
HLA-DRB1	50	0.85	50	0.88	aa_55R	0.655
HLA-DRB1	50	0.15	50	0.12	aa_55Q	0.655
HLA-DRB1	50	0.11	50	0.17	aa_56Y	0.289
HLA-DRB1	50	0.81	50	0.62	aa_56F	0.00882
HLA-DRB1	50	0.08	50	0.21	aa_56L	0.0243
HLA-DRB1	50	0.01	50	0.04	aa_58H	0.178
HLA-DRB1	50	0.74	50	0.63	aa_58D	0.123
HLA-DRB1	50	0.25	50	0.33	aa_58E	0.276
HLA-DRB1	50	0.07	50	0.17	aa_60C	0.0755
HLA-DRB1	50	0.75	50	0.61	aa_60Y	0.0545
HLA-DRB1	50	0.01	50	0.03	aa_60H	0.357
HLA-DRB1	50	0.01	50	0.03	aa_60R	0.282
HLA-DRB1	50	0.01	50	0.04	aa_60G	0.178
HLA-DRB1	50	0.15	50	0.12	aa_60L	0.655
HLA-DRB1	50	0.01	50	0.03	aa_61V	0.282
HLA-DRB1	50	0.91	50	0.76	aa_61F	0.00998
HLA-DRB1	50	0.08	50	0.21	aa_61I	0.0205
HLA-DRB1	50	0.74	50	0.72	aa_62Y	0.718
HLA-DRB1	50	0.26	50	0.28	aa_62H	0.718
HLA-DRB1	50	0.15	50	0.13	aa_63H	0.727
HLA-DRB1	50	0.85	50	0.87	aa_63N	0.727
HLA-DRB1	50	0.21	50	0.14	aa_67F	0.285
HLA-DRB1	50	0	50	0.01	aa_67L	0.292
HLA-DRB1	50	0.2	50	0.26	aa_67N	0.368
HLA-DRB1	50	0.41	50	0.3	aa_67Y	0.167
HLA-DRB1	50	0.18	50	0.29	aa_67S	0.133
HLA-DRB1	50	0	50	0.01	aa_68L	0.292
HLA-DRB1	50	0.01	50	0.03	aa_68A	0.282
HLA-DRB1	50	0.99	50	0.96	aa_68V	0.145
HLA-DRB1	50	0.01	50	0.03	aa_70Y	0.282
HLA-DRB1	50	0.99	50	0.97	aa_70F	0.282
HLA-DRB1	50	0.53	50	0.59	aa_77Y	0.462
HLA-DRB1	50	0.47	50	0.41	aa_77F	0.462
HLA-DRB1	50	0.17	50	0.17	aa_87V	0.878
HLA-DRB1	50	0.06	50	0.02	aa_87A	0.254
HLA-DRB1	50	0.69	50	0.76	aa_87D	0.408
HLA-DRB1	50	0.08	50	0.05	aa_87S	0.487
HLA-DRB1	50	0.78	50	0.91	aa_88A	0.0157
HLA-DRB1	50	0.22	50	0.09	aa_88E	0.0157
HLA-DRB1	50	0.78	50	0.81	aa_90Y	0.767
HLA-DRB1	50	0.06	50	0.02	aa_90H	0.254
HLA-DRB1	50	0.16	50	0.17	aa_90S	0.739
HLA-DRB1	50	0.27	50	0.21	aa_97F	0.382
HLA-DRB1	50	0.37	50	0.47	aa_97L	0.233
HLA-DRB1	50	0.36	50	0.32	aa_97I	0.607
HLA-DRB1	50	0.54	50	0.41	aa_100D	0.15
HLA-DRB1	50	0.08	50	0.09	aa_100R	0.728
HLA-DRB1	50	0.38	50	0.5	aa_100Q	0.205
HLA-DRB1	50	0.12	50	0.18	aa_101K	0.242
HLA-DRB1	50	0.13	50	0.12	aa_101E	0.917
HLA-DRB1	50	0.67	50	0.61	aa_101R	0.387
HLA-DRB1	50	0.08	50	0.09	aa_101A	0.893
HLA-DRB1	50	0.74	50	0.75	aa_103A	0.908
HLA-DRB1	50	0.26	50	0.25	aa_103G	0.908
HLA-DRB1	50	0.11	50	0.13	aa_104R	0.767
HLA-DRB1	50	0.15	50	0.12	aa_104Q	0.655
HLA-DRB1	50	0.6	50	0.61	aa_104A	0.842
HLA-DRB1	50	0.03	50	0.05	aa_104L	0.618
HLA-DRB1	50	0.11	50	0.09	aa_104E	0.678
HLA-DRB1	50	0.11	50	0.13	aa_107N	0.767
HLA-DRB1	50	0.89	50	0.87	aa_107T	0.767
HLA-DRB1	50	0.84	50	0.84	aa_108Y	0.888
HLA-DRB1	50	0.16	50	0.16	aa_108V	0.888
HLA-DRB1	50	0.94	50	0.93	aa_115V	0.713
HLA-DRB1	50	0.06	50	0.07	aa_115A	0.713
HLA-DRB1	50	0.44	50	0.53	aa_116G	0.325
HLA-DRB1	50	0.56	50	0.47	aa_116V	0.325
HLA-DRB1	50	0.07	50	0.17	aa_126E	0.0755
HLA-DRB1	50	0.67	50	0.55	aa_126H	0.15
HLA-DRB1	50	0.15	50	0.13	aa_126Y	0.727
HLA-DRB1	50	0.11	50	0.15	aa_126Q	0.429
HLA-DRB1	50	0.69	50	0.7	aa_128K	0.995
HLA-DRB1	50	0.31	50	0.3	aa_128E	0.995
HLA-DRB1	50	0.31	50	0.29	aa_134A	0.87
HLA-DRB1	50	0.69	50	0.71	aa_134S	0.87
HLA-DRB1	50	0.99	50	1	aa_142H	0.301
HLA-DRB1	50	0.01	50	0	aa_142Y	0.301
HLA-DRB1	50	0.84	50	0.84	aa_150S	0.955
HLA-DRB1	50	0.16	50	0.16	aa_150N	0.955
HLA-DRB1	50	0.1	50	0.12	aa_163L	0.728
HLA-DRB1	50	0.9	50	0.88	aa_163R	0.728
HLA-DRB1	50	0.33	50	0.45	aa_170A	0.0834
HLA-DRB1	50	0.67	50	0.55	aa_170T	0.0834
HLA-DRB1	50	0.9	50	0.88	aa_172V	0.728
HLA-DRB1	50	0.1	50	0.12	aa_172M	0.728
HLA-DRB1	50	0.51	50	0.39	aa_179H	0.0976
HLA-DRB1	50	0.49	50	0.61	aa_179Q	0.0976
HLA-DRB1	50	0.99	50	0.97	aa_196R	0.282
HLA-DRB1	50	0.01	50	0.03	aa_196Q	0.282
HLA-DRB1	50	0.15	50	0.13	aa_210L	0.727
HLA-DRB1	50	0.85	50	0.87	aa_210V	0.727
HLA-DRB1	50	0.17	50	0.19	aa_211M	0.602
HLA-DRB1	50	0.83	50	0.81	aa_211T	0.602
HLA-DRB1	50	0.03	50	0.05	aa_219S	0.618
HLA-DRB1	50	0.97	50	0.95	aa_219R	0.618
HLA-DRB1	50	0.47	50	0.59	aa_263T	0.146
HLA-DRB1	50	0.53	50	0.41	aa_263R	0.146
HLA-E	50	0.42	50	0.49	aa_128G	0.427
HLA-E	50	0.58	50	0.51	aa_128R	0.427
HLA-E	50	0	50	0.04	aa_288S	0.0608
HLA-E	50	1	50	0.96	aa_288P	0.0608
HLA-F	50	0.01	50	0.02	aa_71Q	0.482
HLA-F	50	0.99	50	0.98	aa_71P	0.482
HLA-F	50	0.84	50	0.83	aa_272S	0.968
HLA-F	50	0.16	50	0.17	aa_272P	0.968
HLA-G	50	0.05	50	0.03	aa_55S	0.13
HLA-G	50	0.95	50	0.97	aa_55T	0.13
HLA-G	50	0.16	50	0.16	aa_134I	0.885
HLA-G	50	0.84	50	0.84	aa_134L	0.885
HLA-G	50	0.97	50	0.99	aa_154L	0.309
HLA-G	50	0.03	50	0.01	aa_154del	0.309
HLA-G	50	0.03	50	0.01	aa_155del	0.309
HLA-G	50	0.97	50	0.99	aa_155R	0.309
HLA-G	50	0.97	50	0.99	aa_156S	0.309
HLA-G	50	0.03	50	0.01	aa_156del	0.309
HLA-G	50	0.97	50	0.99	aa_157W	0.309
HLA-G	50	0.03	50	0.01	aa_157del	0.309
HLA-G	50	0.97	50	0.99	aa_158T	0.309
HLA-G	50	0.03	50	0.01	aa_158del	0.309
HLA-G	50	0.03	50	0.01	aa_159C	0.309
HLA-G	50	0.97	50	0.99	aa_159A	0.309
HLA-G	50	0.97	50	0.99	aa_161D	0.309
HLA-G	50	0.03	50	0.01	aa_161P	0.309
HLA-G	50	0.03	50	0.01	aa_162G	0.309
HLA-G	50	0.97	50	0.99	aa_162T	0.309
HLA-G	50	0.97	50	0.99	aa_163A	0.309
HLA-G	50	0.03	50	0.01	aa_163P	0.309
HLA-G	50	0.03	50	0.01	aa_164Q	0.309
HLA-G	50	0.97	50	0.99	aa_164A	0.309
HLA-G	50	0.97	50	0.99	aa_165Q	0.309
HLA-G	50	0.03	50	0.01	aa_165R	0.309
HLA-G	50	0.97	50	0.99	aa_166I	0.309
HLA-G	50	0.03	50	0.01	aa_166T	0.309
HLA-G	50	0.97	50	0.99	aa_167S	0.309
HLA-G	50	0.03	50	0.01	aa_167L	0.309
HLA-G	50	0.03	50	0.01	aa_168R	0.309
HLA-G	50	0.97	50	0.99	aa_168K	0.309
HLA-G	50	0.97	50	0.99	aa_169R	0.309
HLA-G	50	0.03	50	0.01	aa_169L	0.309
HLA-G	50	0.03	50	0.01	aa_170R	0.309
HLA-G	50	0.97	50	0.99	aa_170K	0.309
HLA-G	50	0.03	50	0.01	aa_171S	0.309
HLA-G	50	0.97	50	0.99	aa_171C	0.309
HLA-G	50	0.97	50	0.99	aa_172E	0.309
HLA-G	50	0.03	50	0.01	aa_172P	0.309
HLA-G	50	0.03	50	0.01	aa_173S	0.309
HLA-G	50	0.97	50	0.99	aa_173A	0.309
HLA-G	50	0.03	50	0.01	aa_175S	0.309
HLA-G	50	0.97	50	0.99	aa_175N	0.309
HLA-G	50	0.97	50	0.99	aa_177A	0.309
HLA-G	50	0.03	50	0.01	aa_177del	0.309
HLA-G	50	0.97	50	0.99	aa_178E	0.309
HLA-G	50	0.03	50	0.01	aa_178del	0.309
HLA-G	50	0.03	50	0.01	aa_179del	0.309
HLA-G	50	0.97	50	0.99	aa_179Q	0.309
HLA-G	50	0.97	50	0.99	aa_182A	0.309
HLA-G	50	0.03	50	0.01	aa_182P	0.309
HLA-G	50	0.97	50	0.99	aa_183Y	0.309
HLA-G	50	0.03	50	0.01	aa_183M	0.309
HLA-G	50	0.03	50	0.01	aa_184del	0.309
HLA-G	50	0.97	50	0.99	aa_184L	0.309
HLA-G	50	0.03	50	0.01	aa_185del	0.309
HLA-G	50	0.97	50	0.99	aa_185E	0.309
HLA-G	50	0.97	50	0.99	aa_186G	0.309
HLA-G	50	0.03	50	0.01	aa_186del	0.309
HLA-G	50	0.97	50	0.99	aa_187T	0.309
HLA-G	50	0.03	50	0.01	aa_187del	0.309
HLA-G	50	0.97	50	0.99	aa_188C	0.309
HLA-G	50	0.03	50	0.01	aa_188del	0.309
HLA-G	50	0.03	50	0.01	aa_189del	0.309
HLA-G	50	0.97	50	0.99	aa_189V	0.309
HLA-G	50	0.03	50	0.01	aa_190del	0.309
HLA-G	50	0.97	50	0.99	aa_190E	0.309
HLA-G	50	0.03	50	0.01	aa_193del	0.309
HLA-G	50	0.97	50	0.99	aa_193H	0.309
HLA-G	50	0.97	50	0.99	aa_194R	0.309
HLA-G	50	0.03	50	0.01	aa_194del	0.309
HLA-G	50	0.03	50	0.01	aa_195del	0.309
HLA-G	50	0.97	50	0.99	aa_195Y	0.309
HLA-G	50	0.97	50	0.99	aa_196L	0.309
HLA-G	50	0.03	50	0.01	aa_196del	0.309
HLA-G	50	0.03	50	0.01	aa_197del	0.309
HLA-G	50	0.97	50	0.99	aa_197E	0.309
HLA-G	50	0.97	50	0.99	aa_199G	0.309
HLA-G	50	0.03	50	0.01	aa_199K	0.309
HLA-G	50	0.03	50	0.01	aa_200G	0.309
HLA-G	50	0.97	50	0.99	aa_200K	0.309
HLA-G	50	0.03	50	0.01	aa_202P	0.309
HLA-G	50	0.97	50	0.99	aa_202M	0.309
HLA-G	50	0.97	50	0.99	aa_203L	0.309
HLA-G	50	0.03	50	0.01	aa_203T	0.309
HLA-G	50	0.03	50	0.01	aa_204W	0.309
HLA-G	50	0.97	50	0.99	aa_204Q	0.309
HLA-G	50	0.97	50	0.99	aa_207D	0.309
HLA-G	50	0.03	50	0.01	aa_207del	0.309
HLA-G	50	0.03	50	0.01	aa_208del	0.309
HLA-G	50	0.97	50	0.99	aa_208P	0.309
HLA-G	50	0.97	50	0.99	aa_209P	0.309
HLA-G	50	0.03	50	0.01	aa_209del	0.309
HLA-G	50	0.03	50	0.01	aa_210del	0.309
HLA-G	50	0.97	50	0.99	aa_210K	0.309
HLA-G	50	0.97	50	0.99	aa_211T	0.309
HLA-G	50	0.03	50	0.01	aa_211del	0.309
HLA-G	50	0.97	50	0.99	aa_212H	0.309
HLA-G	50	0.03	50	0.01	aa_212del	0.309
HLA-G	50	0.97	50	0.99	aa_213V	0.309
HLA-G	50	0.03	50	0.01	aa_213del	0.309
HLA-G	50	0.03	50	0.01	aa_214del	0.309
HLA-G	50	0.97	50	0.99	aa_214T	0.309
HLA-G	50	0.03	50	0.01	aa_215del	0.309
HLA-G	50	0.97	50	0.99	aa_215H	0.309
HLA-G	50	0.03	50	0.01	aa_216del	0.309
HLA-G	50	0.97	50	0.99	aa_216H	0.309
HLA-G	50	0.97	50	0.99	aa_217P	0.309
HLA-G	50	0.03	50	0.01	aa_217del	0.309
HLA-G	50	0.97	50	0.99	aa_218V	0.309
HLA-G	50	0.03	50	0.01	aa_218del	0.309
HLA-G	50	0.03	50	0.01	aa_219del	0.309
HLA-G	50	0.97	50	0.99	aa_219F	0.309
HLA-G	50	0.03	50	0.01	aa_220del	0.309
HLA-G	50	0.97	50	0.99	aa_220D	0.309
HLA-G	50	0.97	50	0.99	aa_221Y	0.309
HLA-G	50	0.03	50	0.01	aa_221del	0.309
HLA-G	50	0.97	50	0.99	aa_222E	0.309
HLA-G	50	0.03	50	0.01	aa_222del	0.309
HLA-G	50	0.03	50	0.01	aa_223del	0.309
HLA-G	50	0.97	50	0.99	aa_223A	0.309
HLA-G	50	0.97	50	0.99	aa_224T	0.309
HLA-G	50	0.03	50	0.01	aa_224del	0.309
HLA-G	50	0.97	50	0.99	aa_225L	0.309
HLA-G	50	0.03	50	0.01	aa_225del	0.309
HLA-G	50	0.97	50	0.99	aa_227C	0.309
HLA-G	50	0.03	50	0.01	aa_227A	0.309
HLA-G	50	0.03	50	0.01	aa_229S	0.309
HLA-G	50	0.97	50	0.99	aa_229A	0.309
HLA-G	50	0.03	50	0.01	aa_230del	0.309
HLA-G	50	0.97	50	0.99	aa_230L	0.309
HLA-G	50	0.97	50	0.99	aa_231G	0.309
HLA-G	50	0.03	50	0.01	aa_231del	0.309
HLA-G	50	0.03	50	0.01	aa_232del	0.309
HLA-G	50	0.97	50	0.99	aa_232F	0.309
HLA-G	50	0.97	50	0.99	aa_233Y	0.309
HLA-G	50	0.03	50	0.01	aa_233del	0.309
HLA-G	50	0.03	50	0.01	aa_234del	0.309
HLA-G	50	0.97	50	0.99	aa_234P	0.309
HLA-G	50	0.97	50	0.99	aa_235A	0.309
HLA-G	50	0.03	50	0.01	aa_235del	0.309
HLA-G	50	0.97	50	0.99	aa_236E	0.309
HLA-G	50	0.03	50	0.01	aa_236del	0.309
HLA-G	50	0.97	50	0.99	aa_237I	0.309
HLA-G	50	0.03	50	0.01	aa_237del	0.309
HLA-G	50	0.97	50	0.99	aa_238I	0.309
HLA-G	50	0.03	50	0.01	aa_238del	0.309
HLA-G	50	0.97	50	0.99	aa_239L	0.309
HLA-G	50	0.03	50	0.01	aa_239del	0.309
HLA-G	50	0.97	50	0.99	aa_240T	0.309
HLA-G	50	0.03	50	0.01	aa_240del	0.309
HLA-G	50	0.97	50	0.99	aa_241W	0.309
HLA-G	50	0.03	50	0.01	aa_241del	0.309
HLA-G	50	0.03	50	0.01	aa_242del	0.309
HLA-G	50	0.97	50	0.99	aa_242Q	0.309
HLA-G	50	0.97	50	0.99	aa_243R	0.309
HLA-G	50	0.03	50	0.01	aa_243del	0.309
HLA-G	50	0.97	50	0.99	aa_244D	0.309
HLA-G	50	0.03	50	0.01	aa_244del	0.309
HLA-G	50	0.97	50	0.99	aa_245G	0.309
HLA-G	50	0.03	50	0.01	aa_245del	0.309
HLA-G	50	0.03	50	0.01	aa_246del	0.309
HLA-G	50	0.97	50	0.99	aa_246E	0.309
HLA-G	50	0.97	50	0.99	aa_247D	0.309
HLA-G	50	0.03	50	0.01	aa_247del	0.309
HLA-G	50	0.97	50	0.99	aa_248Q	0.309
HLA-G	50	0.03	50	0.01	aa_248del	0.309
HLA-G	50	0.03	50	0.01	aa_249del	0.309
HLA-G	50	0.97	50	0.99	aa_249T	0.309
HLA-G	50	0.97	50	0.99	aa_250Q	0.309
HLA-G	50	0.03	50	0.01	aa_250del	0.309
HLA-G	50	0.97	50	0.99	aa_251D	0.309
HLA-G	50	0.03	50	0.01	aa_251del	0.309
HLA-G	50	0.97	50	0.99	aa_252V	0.309
HLA-G	50	0.03	50	0.01	aa_252del	0.309
HLA-G	50	0.03	50	0.01	aa_253del	0.309
HLA-G	50	0.97	50	0.99	aa_253E	0.309
HLA-G	50	0.97	50	0.99	aa_254L	0.309
HLA-G	50	0.03	50	0.01	aa_254del	0.309
HLA-G	50	0.03	50	0.01	aa_255del	0.309
HLA-G	50	0.97	50	0.98	aa_255V	0.631
HLA-G	50	0	50	0.01	aa_255M	0.335
HLA-G	50	0.97	50	0.99	aa_256E	0.309
HLA-G	50	0.03	50	0.01	aa_256del	0.309
HLA-G	50	0.03	50	0.01	aa_257del	0.309
HLA-G	50	0.97	50	0.99	aa_257T	0.309
HLA-G	50	0.03	50	0.01	aa_258del	0.309
HLA-G	50	0.97	50	0.99	aa_258R	0.309
HLA-G	50	0.03	50	0.01	aa_259del	0.309
HLA-G	50	0.97	50	0.99	aa_259P	0.309
HLA-G	50	0.03	50	0.01	aa_260del	0.309
HLA-G	50	0.97	50	0.99	aa_260A	0.309
HLA-G	50	0.97	50	0.99	aa_261G	0.309
HLA-G	50	0.03	50	0.01	aa_261del	0.309
HLA-G	50	0.03	50	0.01	aa_262del	0.309
HLA-G	50	0.97	50	0.99	aa_262D	0.309
HLA-G	50	0.97	50	0.99	aa_264T	0.309
HLA-G	50	0.03	50	0.01	aa_264S	0.309
HLA-G	50	0.03	50	0.01	aa_265T	0.309
HLA-G	50	0.97	50	0.99	aa_265F	0.309
HLA-G	50	0.97	50	0.99	aa_266Q	0.309
HLA-G	50	0.03	50	0.01	aa_266D	0.309
HLA-G	50	0.03	50	0.01	aa_267T	0.309
HLA-G	50	0.97	50	0.99	aa_267K	0.309
HLA-G	50	0.03	50	0.01	aa_269del	0.309
HLA-G	50	0.97	50	0.99	aa_269A	0.309
HLA-G	50	0.97	50	0.99	aa_270A	0.309
HLA-G	50	0.03	50	0.01	aa_270del	0.309
HLA-G	50	0.97	50	0.99	aa_271V	0.309
HLA-G	50	0.03	50	0.01	aa_271del	0.309
HLA-G	50	0.03	50	0.01	aa_272del	0.309
HLA-G	50	0.97	50	0.99	aa_272V	0.309
HLA-G	50	0.03	50	0.01	aa_273del	0.309
HLA-G	50	0.97	50	0.99	aa_273V	0.309
HLA-G	50	0.97	50	0.99	aa_274P	0.309
HLA-G	50	0.03	50	0.01	aa_274del	0.309
HLA-G	50	0.97	50	0.99	aa_275S	0.309
HLA-G	50	0.03	50	0.01	aa_275del	0.309
HLA-G	50	0.03	50	0.01	aa_276del	0.309
HLA-G	50	0.97	50	0.99	aa_276G	0.309
HLA-G	50	0.97	50	0.99	aa_277E	0.309
HLA-G	50	0.03	50	0.01	aa_277R	0.309
HLA-G	50	0.97	50	0.99	aa_278E	0.309
HLA-G	50	0.03	50	0.01	aa_278T	0.309
HLA-G	50	0.03	50	0.01	aa_279G	0.309
HLA-G	50	0.97	50	0.99	aa_279Q	0.309
HLA-G	50	0.97	50	0.99	aa_281Y	0.309
HLA-G	50	0.03	50	0.01	aa_281R	0.309
HLA-G	50	0.9	50	0.93	aa_282T	0.398
HLA-G	50	0.07	50	0.06	aa_282M	0.729
HLA-G	50	0.03	50	0.01	aa_282C	0.309
HLA-G	50	0.97	50	0.99	aa_284H	0.309
HLA-G	50	0.03	50	0.01	aa_284del	0.309
HLA-G	50	0.03	50	0.01	aa_285del	0.309
HLA-G	50	0.97	50	0.99	aa_285V	0.309
HLA-G	50	0.03	50	0.01	aa_286del	0.309
HLA-G	50	0.97	50	0.99	aa_286Q	0.309
HLA-G	50	0.03	50	0.01	aa_287del	0.309
HLA-G	50	0.97	50	0.99	aa_287H	0.309
HLA-G	50	0.97	50	0.99	aa_288E	0.309
HLA-G	50	0.03	50	0.01	aa_288del	0.309
HLA-G	50	0.03	50	0.01	aa_289del	0.309
HLA-G	50	0.97	50	0.99	aa_289G	0.309
HLA-G	50	0.03	50	0.01	aa_290del	0.309
HLA-G	50	0.97	50	0.99	aa_290L	0.309
HLA-G	50	0.97	50	0.99	aa_291P	0.309
HLA-G	50	0.03	50	0.01	aa_291del	0.309
HLA-G	50	0.03	50	0.01	aa_292del	0.309
HLA-G	50	0.97	50	0.99	aa_292E	0.309
HLA-G	50	0.97	50	0.99	aa_293P	0.309
HLA-G	50	0.03	50	0.01	aa_293del	0.309
HLA-G	50	0.97	50	0.99	aa_294L	0.309
HLA-G	50	0.03	50	0.01	aa_294del	0.309
HLA-G	50	0.03	50	0.01	aa_295del	0.309
HLA-G	50	0.97	50	0.99	aa_295M	0.309
HLA-G	50	0.97	50	0.99	aa_296L	0.309
HLA-G	50	0.03	50	0.01	aa_296del	0.309
HLA-G	50	0.03	50	0.01	aa_297del	0.309
HLA-G	50	0.97	50	0.99	aa_297R	0.309
HLA-G	50	0.03	50	0.01	aa_298del	0.309
HLA-G	50	0.97	50	0.99	aa_298W	0.309
HLA-G	50	0.03	50	0.01	aa_299del	0.309
HLA-G	50	0.97	50	0.99	aa_299K	0.309
HLA-G	50	0.03	50	0.01	aa_300del	0.309
HLA-G	50	0.97	50	0.99	aa_300Q	0.309
HLA-G	50	0.97	50	0.99	aa_301S	0.309
HLA-G	50	0.03	50	0.01	aa_301del	0.309
HLA-G	50	0.03	50	0.01	aa_303A	0.309
HLA-G	50	0.97	50	0.99	aa_303L	0.309
HLA-G	50	0.97	50	0.99	aa_304P	0.309
HLA-G	50	0.03	50	0.01	aa_304R	0.309
HLA-G	50	0.03	50	0.01	aa_306P	0.309
HLA-G	50	0.97	50	0.99	aa_306I	0.309
HLA-G	50	0.97	50	0.99	aa_308I	0.309
HLA-G	50	0.03	50	0.01	aa_308del	0.309
HLA-G	50	0.03	50	0.01	aa_309del	0.309
HLA-G	50	0.97	50	0.99	aa_309M	0.309
HLA-G	50	0.03	50	0.01	aa_310del	0.309
HLA-G	50	0.97	50	0.99	aa_310G	0.309
HLA-G	50	0.97	50	0.99	aa_311I	0.309
HLA-G	50	0.03	50	0.01	aa_311del	0.309
HLA-G	50	0.03	50	0.01	aa_312del	0.309
HLA-G	50	0.97	50	0.99	aa_312V	0.309
HLA-G	50	0.97	50	0.99	aa_313A	0.309
HLA-G	50	0.03	50	0.01	aa_313del	0.309
HLA-G	50	0.97	50	0.99	aa_314G	0.309
HLA-G	50	0.03	50	0.01	aa_314del	0.309
HLA-G	50	0.97	50	0.99	aa_315L	0.309
HLA-G	50	0.03	50	0.01	aa_315del	0.309
HLA-G	50	0.03	50	0.01	aa_316del	0.309
HLA-G	50	0.97	50	0.99	aa_316V	0.309
HLA-G	50	0.03	50	0.01	aa_317del	0.309
HLA-G	50	0.97	50	0.99	aa_317V	0.309
HLA-G	50	0.97	50	0.99	aa_318L	0.309
HLA-G	50	0.03	50	0.01	aa_318del	0.309
HLA-G	50	0.03	50	0.01	aa_319del	0.309
HLA-G	50	0.97	50	0.99	aa_319A	0.309
HLA-G	50	0.97	50	0.99	aa_320A	0.309
HLA-G	50	0.03	50	0.01	aa_320del	0.309
HLA-G	50	0.97	50	0.99	aa_321V	0.309
HLA-G	50	0.03	50	0.01	aa_321del	0.309
HLA-G	50	0.97	50	0.99	aa_322V	0.309
HLA-G	50	0.03	50	0.01	aa_322del	0.309
HLA-G	50	0.03	50	0.01	aa_323del	0.309
HLA-G	50	0.97	50	0.99	aa_323T	0.309
HLA-G	50	0.97	50	0.99	aa_324G	0.309
HLA-G	50	0.03	50	0.01	aa_324del	0.309
HLA-G	50	0.97	50	0.99	aa_325A	0.309
HLA-G	50	0.03	50	0.01	aa_325del	0.309
HLA-G	50	0.97	50	0.99	aa_326A	0.309
HLA-G	50	0.03	50	0.01	aa_326del	0.309
HLA-G	50	0.97	50	0.99	aa_327V	0.309
HLA-G	50	0.03	50	0.01	aa_327del	0.309
HLA-G	50	0.03	50	0.01	aa_328del	0.309
HLA-G	50	0.97	50	0.99	aa_328A	0.309
HLA-G	50	0.97	50	0.99	aa_329A	0.309
HLA-G	50	0.03	50	0.01	aa_329del	0.309
HLA-G	50	0.97	50	0.99	aa_330V	0.309
HLA-G	50	0.03	50	0.01	aa_330del	0.309
HLA-G	50	0.97	50	0.99	aa_331L	0.309
HLA-G	50	0.03	50	0.01	aa_331del	0.309
HLA-G	50	0.03	50	0.01	aa_332del	0.309
HLA-G	50	0.97	50	0.99	aa_332W	0.309
HLA-G	50	0.03	50	0.01	aa_334H	0.309
HLA-G	50	0.97	50	0.99	aa_334K	0.309
HLA-G	50	0.03	50	0.01	aa_335T	0.309
HLA-G	50	0.97	50	0.99	aa_335K	0.309
HLA-G	50	0.03	50	0.01	aa_336X	0.309
HLA-G	50	0.97	50	0.99	aa_336S	0.309
HLA-G	50	0.97	50	0.99	aa_337S	0.309
HLA-G	50	0.03	50	0.01	aa_337del	0.309
HLA-G	50	0.97	50	0.99	aa_338D	0.309
HLA-G	50	0.03	50	0.01	aa_338del	0.309
HLA-G	50	0.03	50	0.01	aa_339del	0.309
HLA-G	50	0.97	50	0.99	aa_339X	0.309
MICA	50	0.02	50	0.03	aa_29P	0.696
MICA	50	0.98	50	0.97	aa_29R	0.696
MICA	50	0.27	50	0.21	aa_37G	0.289
MICA	50	0.73	50	0.79	aa_37W	0.289
MICA	50	0.93	50	0.94	aa_47A	0.881
MICA	50	0.07	50	0.06	aa_47T	0.881
MICA	50	0.01	50	0	aa_49G	0.452
MICA	50	0.99	50	1	aa_49V	0.452
MICA	50	0.63	50	0.68	aa_59Y	0.507
MICA	50	0.37	50	0.32	aa_59C	0.507
MICA	50	0.96	50	0.98	aa_114Q	0.478
MICA	50	0.04	50	0.02	aa_114R	0.478
MICA	50	0.3	50	0.26	aa_145V	0.476
MICA	50	0.7	50	0.74	aa_145L	0.476
MICA	50	0.97	50	0.98	aa_148E	0.536
MICA	50	0.03	50	0.02	aa_148K	0.536
MICA	50	0.37	50	0.32	aa_152M	0.507
MICA	50	0.63	50	0.68	aa_152V	0.507
MICA	50	0.96	50	0.98	aa_174M	0.266
MICA	50	0.04	50	0.02	aa_174V	0.266
MICA	50	0	50	0.01	aa_179R	0.454
MICA	50	0.99	50	0.99	aa_179H	0.953
MICA	50	0.01	50	0	aa_179L	0.414
MICA	50	0.63	50	0.68	aa_196E	0.507
MICA	50	0.37	50	0.32	aa_196K	0.507
MICA	50	0.38	50	0.34	aa_198S	0.567
MICA	50	0.62	50	0.66	aa_198G	0.567
MICA	50	0.01	50	0	aa_199I	0.341
MICA	50	0.99	50	1	aa_199V	0.341
MICA	50	0.19	50	0.12	aa_204R	0.0904
MICA	50	0.81	50	0.88	aa_204T	0.0904
MICA	50	0.63	50	0.68	aa_229S	0.507
MICA	50	0.37	50	0.32	aa_229G	0.507
MICA	50	0.63	50	0.68	aa_233R	0.507
MICA	50	0.37	50	0.32	aa_233W	0.507
MICA	50	0.33	50	0.42	aa_236I	0.193
MICA	50	0.67	50	0.58	aa_236T	0.193
MICA	50	0.37	50	0.32	aa_238S	0.507
MICA	50	0.63	50	0.68	aa_238T	0.507
MICA	50	0.94	50	0.97	aa_244V	0.465
MICA	50	0.06	50	0.03	aa_244L	0.465
MICA	50	0.33	50	0.42	aa_274R	0.193
MICA	50	0.67	50	0.58	aa_274Q	0.193
MICA	50	1	50	0.99	aa_279R	0.454
MICA	50	0	50	0.01	aa_279S	0.454
MICA	50	0.05	50	0.02	aa_294A	0.178
MICA	50	0.95	50	0.98	aa_294P	0.178
MICA	50	0.04	50	0.02	aa_300C	0.478
MICA	50	0.96	50	0.98	aa_300V	0.478
MICA	50	0.96	50	0.98	aa_301L	0.478
MICA	50	0.04	50	0.02	aa_301W	0.478
MICA	50	0.96	50	0.98	aa_302del	0.478
MICA	50	0.04	50	0.02	aa_302C	0.478
MICA	50	0.04	50	0.02	aa_303F	0.478
MICA	50	0.96	50	0.98	aa_303del	0.478
MICA	50	0.96	50	0.98	aa_304del	0.478
MICA	50	0.04	50	0.02	aa_304R	0.478
MICA	50	0.04	50	0.02	aa_306I	0.478
MICA	50	0.96	50	0.98	aa_306L	0.478
MICA	50	0.04	50	0.02	aa_307G	0.478
MICA	50	0.96	50	0.98	aa_307Q	0.478
MICA	50	0.96	50	0.98	aa_308S	0.478
MICA	50	0.04	50	0.02	aa_308R	0.478
MICA	50	0.04	50	0.02	aa_310del	0.478
MICA	50	0.96	50	0.98	aa_310W	0.478
MICA	50	0.04	50	0.02	aa_311S	0.478
MICA	50	0.96	50	0.98	aa_311Q	0.478
MICA	50	0.04	50	0.02	aa_312M	0.478
MICA	50	0.96	50	0.98	aa_312T	0.478
MICA	50	0.96	50	0.98	aa_314H	0.478
MICA	50	0.04	50	0.02	aa_314L	0.478
MICA	50	0.96	50	0.98	aa_315V	0.478
MICA	50	0.04	50	0.02	aa_315L	0.478
MICA	50	0.04	50	0.02	aa_316L	0.478
MICA	50	0.96	50	0.98	aa_316S	0.478
MICA	50	0.04	50	0.02	aa_317L	0.478
MICA	50	0.96	50	0.98	aa_317A	0.478
MICA	50	0.04	50	0.02	aa_318L	0.478
MICA	50	0.96	50	0.98	aa_318V	0.478
MICA	50	0.18	50	0.16	aa_319A	0.71
MICA	50	0.82	50	0.84	aa_319del	0.71
MICA	50	0.18	50	0.16	aa_320A	0.71
MICA	50	0.82	50	0.84	aa_320del	0.71
MICA	50	0.18	50	0.16	aa_321A	0.71
MICA	50	0.82	50	0.84	aa_321del	0.71
MICA	50	0.53	50	0.45	aa_322A	0.253
MICA	50	0.43	50	0.53	aa_322del	0.161
MICA	50	0.04	50	0.02	aa_322L	0.478
MICA	50	0.04	50	0.02	aa_323L	0.478
MICA	50	0.1	50	0.11	aa_323del	0.673
MICA	50	0.86	50	0.87	aa_323A	0.984
MICA	50	0.96	50	0.98	aa_324A	0.478
MICA	50	0.04	50	0.02	aa_324L	0.478
MICA	50	0.73	50	0.64	aa_325A	0.203
MICA	50	0.23	50	0.34	aa_325G	0.106
MICA	50	0.04	50	0.02	aa_325L	0.478
MICA	50	0.04	50	0.02	aa_326L	0.478
MICA	50	0.73	50	0.64	aa_326A	0.203
MICA	50	0.23	50	0.34	aa_326C	0.106
MICA	50	0.04	50	0.02	aa_327L	0.478
MICA	50	0.73	50	0.64	aa_327A	0.203
MICA	50	0.23	50	0.34	aa_327C	0.106
MICA	50	0.73	50	0.64	aa_328I	0.203
MICA	50	0.04	50	0.02	aa_328L	0.478
MICA	50	0.23	50	0.34	aa_328Y	0.106
MICA	50	0.23	50	0.34	aa_330C	0.106
MICA	50	0.73	50	0.64	aa_330V	0.203
MICA	50	0.04	50	0.02	aa_330L	0.478
MICA	50	0.73	50	0.64	aa_331I	0.203
MICA	50	0.04	50	0.02	aa_331L	0.478
MICA	50	0.23	50	0.34	aa_331del	0.106
MICA	50	0.23	50	0.34	aa_332del	0.106
MICA	50	0.04	50	0.02	aa_332L	0.478
MICA	50	0.73	50	0.64	aa_332I	0.203
MICA	50	0.23	50	0.34	aa_333Y	0.106
MICA	50	0.73	50	0.64	aa_333I	0.203
MICA	50	0.04	50	0.02	aa_333L	0.478
MICA	50	0.77	50	0.66	aa_334F	0.106
MICA	50	0.23	50	0.34	aa_334Y	0.106
MICA	50	0.04	50	0.02	aa_335S	0.478
MICA	50	0.96	50	0.98	aa_335Y	0.478
MICA	50	0.73	50	0.64	aa_336V	0.203
MICA	50	0.23	50	0.34	aa_336F	0.106
MICA	50	0.04	50	0.02	aa_336T	0.478
MICA	50	0.23	50	0.34	aa_337L	0.106
MICA	50	0.04	50	0.02	aa_337del	0.478
MICA	50	0.23	50	0.2	aa_337C	0.533
MICA	50	0.5	50	0.44	aa_337R	0.434
MICA	50	0.96	50	0.98	aa_338C	0.478
MICA	50	0.04	50	0.02	aa_338del	0.478
MICA	50	0.73	50	0.64	aa_339C	0.203
MICA	50	0.27	50	0.36	aa_339del	0.203
MICA	50	0.27	50	0.36	aa_340del	0.203
MICA	50	0.73	50	0.64	aa_340K	0.203
MICA	50	0.27	50	0.36	aa_341del	0.203
MICA	50	0.73	50	0.64	aa_341K	0.203
MICA	50	0.27	50	0.36	aa_342del	0.203
MICA	50	0.73	50	0.64	aa_342K	0.203
MICA	50	0.73	50	0.64	aa_343T	0.203
MICA	50	0.27	50	0.36	aa_343del	0.203
MICA	50	0.27	50	0.36	aa_344del	0.203
MICA	50	0.73	50	0.64	aa_344S	0.203
MICA	50	0.27	50	0.36	aa_345del	0.203
MICA	50	0.73	50	0.64	aa_345A	0.203
MICA	50	0.73	50	0.64	aa_346A	0.203
MICA	50	0.27	50	0.36	aa_346del	0.203
MICA	50	0.27	50	0.36	aa_347del	0.203
MICA	50	0.73	50	0.64	aa_347E	0.203
MICA	50	0.27	50	0.36	aa_348del	0.203
MICA	50	0.73	50	0.64	aa_348G	0.203
MICA	50	0.73	50	0.64	aa_349P	0.203
MICA	50	0.27	50	0.36	aa_349del	0.203
MICA	50	0.73	50	0.64	aa_350E	0.203
MICA	50	0.27	50	0.36	aa_350del	0.203
MICA	50	0.73	50	0.64	aa_351L	0.203
MICA	50	0.27	50	0.36	aa_351del	0.203
MICA	50	0.73	50	0.64	aa_352V	0.203
MICA	50	0.27	50	0.36	aa_352del	0.203
MICA	50	0.77	50	0.66	aa_353S	0.106
MICA	50	0.23	50	0.34	aa_353del	0.106
MICA	50	0.04	50	0.02	aa_354V	0.478
MICA	50	0.23	50	0.34	aa_354del	0.106
MICA	50	0.73	50	0.64	aa_354L	0.203
MICA	50	0.23	50	0.34	aa_355del	0.106
MICA	50	0.04	50	0.02	aa_355V	0.478
MICA	50	0.73	50	0.64	aa_355Q	0.203
MICA	50	0.77	50	0.66	aa_356V	0.106
MICA	50	0.23	50	0.34	aa_356del	0.106
MICA	50	0.23	50	0.34	aa_357del	0.106
MICA	50	0.73	50	0.64	aa_357L	0.203
MICA	50	0.04	50	0.02	aa_357R	0.478
MICA	50	0.23	50	0.34	aa_358del	0.106
MICA	50	0.73	50	0.64	aa_358D	0.203
MICA	50	0.04	50	0.02	aa_358R	0.478
MICA	50	0.73	50	0.64	aa_359Q	0.203
MICA	50	0.04	50	0.02	aa_359K	0.478
MICA	50	0.23	50	0.34	aa_359del	0.106
MICA	50	0.77	50	0.66	aa_360H	0.106
MICA	50	0.23	50	0.34	aa_360del	0.106
MICA	50	0.23	50	0.34	aa_361del	0.106
MICA	50	0.04	50	0.02	aa_361Q	0.478
MICA	50	0.73	50	0.64	aa_361P	0.203
MICA	50	0.27	50	0.36	aa_362del	0.203
MICA	50	0.73	50	0.64	aa_362V	0.203
MICA	50	0.73	50	0.64	aa_363G	0.203
MICA	50	0.27	50	0.36	aa_363del	0.203
MICA	50	0	50	0.02	aa_364M	0.111
MICA	50	0.73	50	0.62	aa_364T	0.108
MICA	50	0.27	50	0.36	aa_364del	0.203
MICA	50	0.73	50	0.64	aa_365S	0.203
MICA	50	0.27	50	0.36	aa_365del	0.203
MICA	50	0.73	50	0.64	aa_366D	0.203
MICA	50	0.27	50	0.36	aa_366del	0.203
MICA	50	0.27	50	0.36	aa_367del	0.203
MICA	50	0.73	50	0.64	aa_367H	0.203
MICA	50	0.73	50	0.64	aa_368R	0.203
MICA	50	0.27	50	0.36	aa_368del	0.203
MICA	50	0.73	50	0.64	aa_369D	0.203
MICA	50	0.27	50	0.36	aa_369del	0.203
MICA	50	0.73	50	0.64	aa_370A	0.203
MICA	50	0.27	50	0.36	aa_370del	0.203
MICA	50	0.27	50	0.36	aa_371del	0.203
MICA	50	0.73	50	0.64	aa_371T	0.203
MICA	50	0.73	50	0.64	aa_372Q	0.203
MICA	50	0.27	50	0.36	aa_372del	0.203
MICA	50	0.73	50	0.64	aa_373L	0.203
MICA	50	0.27	50	0.36	aa_373del	0.203
MICA	50	0.73	50	0.64	aa_374G	0.203
MICA	50	0.27	50	0.36	aa_374del	0.203
MICA	50	0.73	50	0.64	aa_375F	0.203
MICA	50	0.23	50	0.34	aa_375del	0.106
MICA	50	0.04	50	0.02	aa_375L	0.478
MICA	50	0.23	50	0.34	aa_376del	0.106
MICA	50	0.77	50	0.66	aa_376Q	0.106
MICA	50	0.96	50	0.98	aa_377P	0.478
MICA	50	0.04	50	0.02	aa_377R	0.478
MICA	50	0.96	50	0.98	aa_378L	0.478
MICA	50	0.04	50	0.02	aa_378V	0.478
MICA	50	0.23	50	0.34	aa_379L	0.106
MICA	50	0.73	50	0.64	aa_379M	0.203
MICA	50	0.04	50	0.02	aa_379Q	0.478
MICA	50	0.77	50	0.66	aa_380S	0.106
MICA	50	0.23	50	0.34	aa_380X	0.106
MICA	50	0.23	50	0.34	aa_381del	0.106
MICA	50	0.04	50	0.02	aa_381S	0.478
MICA	50	0.29	50	0.28	aa_381D	0.996
MICA	50	0.44	50	0.36	aa_381A	0.214
MICA	50	0.04	50	0.02	aa_382X	0.478
MICA	50	0.73	50	0.64	aa_382L	0.203
MICA	50	0.23	50	0.34	aa_382del	0.106
MICA	50	0.27	50	0.36	aa_383del	0.203
MICA	50	0.73	50	0.64	aa_383G	0.203
MICA	50	0.73	50	0.64	aa_384S	0.203
MICA	50	0.27	50	0.36	aa_384del	0.203
MICA	50	0.04	50	0.02	aa_385A	0.266
MICA	50	0.27	50	0.36	aa_385del	0.203
MICA	50	0.69	50	0.62	aa_385T	0.397
MICA	50	0.27	50	0.36	aa_386del	0.203
MICA	50	0.73	50	0.64	aa_386G	0.203
MICA	50	0.27	50	0.36	aa_387del	0.203
MICA	50	0.73	50	0.64	aa_387S	0.203
MICA	50	0.73	50	0.64	aa_388T	0.203
MICA	50	0.27	50	0.36	aa_388del	0.203
MICA	50	0.27	50	0.36	aa_389del	0.203
MICA	50	0.73	50	0.64	aa_389E	0.203
MICA	50	0.73	50	0.64	aa_390G	0.203
MICA	50	0.27	50	0.36	aa_390del	0.203
MICA	50	0.68	50	0.59	aa_391A	0.186
MICA	50	0.05	50	0.05	aa_391T	0.748
MICA	50	0.27	50	0.36	aa_391del	0.203
MICA	50	0.73	50	0.64	aa_392X	0.203
MICA	50	0.27	50	0.36	aa_392del	0.203
MICB	50	1	50	0.99	aa_55P	0.381
MICB	50	0	50	0.01	aa_55S	0.381
MICB	50	0.02	50	0	aa_64C	0.0977
MICB	50	0.98	50	1	aa_64R	0.0977
MICB	50	0.89	50	0.79	aa_75D	0.0875
MICB	50	0.11	50	0.21	aa_75N	0.0875
MICB	50	0.71	50	0.69	aa_80K	0.685
MICB	50	0.29	50	0.31	aa_80E	0.685
MICB	50	0.09	50	0.1	aa_121M	0.742
MICB	50	0.91	50	0.9	aa_121I	0.742
MICB	50	0.71	50	0.69	aa_136D	0.685
MICB	50	0.29	50	0.31	aa_136N	0.685
MICB	50	1	50	0.98	aa_193R	0.176
MICB	50	0	50	0.02	aa_193X	0.176
MICB	50	0	50	0.02	aa_194del	0.176
MICB	50	1	50	0.98	aa_194Y	0.176
MICB	50	1	50	0.98	aa_195L	0.176
MICB	50	0	50	0.02	aa_195del	0.176
MICB	50	0	50	0.02	aa_196del	0.176
MICB	50	1	50	0.98	aa_196K	0.176
MICB	50	0	50	0.02	aa_197del	0.176
MICB	50	1	50	0.98	aa_197S	0.176
MICB	50	0	50	0.02	aa_198del	0.176
MICB	50	1	50	0.98	aa_198G	0.176
MICB	50	1	50	0.98	aa_199V	0.176
MICB	50	0	50	0.02	aa_199del	0.176
MICB	50	1	50	0.98	aa_200A	0.176
MICB	50	0	50	0.02	aa_200del	0.176
MICB	50	1	50	0.98	aa_201I	0.176
MICB	50	0	50	0.02	aa_201del	0.176
MICB	50	1	50	0.98	aa_202R	0.176
MICB	50	0	50	0.02	aa_202del	0.176
MICB	50	0	50	0.02	aa_203del	0.176
MICB	50	1	50	0.98	aa_203R	0.176
MICB	50	0	50	0.02	aa_204del	0.176
MICB	50	1	50	0.98	aa_204T	0.176
MICB	50	0	50	0.02	aa_205del	0.176
MICB	50	1	50	0.98	aa_205V	0.176
MICB	50	0	50	0.02	aa_206del	0.176
MICB	50	1	50	0.98	aa_206P	0.176
MICB	50	0	50	0.02	aa_207del	0.176
MICB	50	1	50	0.98	aa_207P	0.176
MICB	50	0	50	0.02	aa_208del	0.176
MICB	50	1	50	0.98	aa_208M	0.176
MICB	50	0	50	0.02	aa_209del	0.176
MICB	50	1	50	0.98	aa_209V	0.176
MICB	50	0	50	0.02	aa_210del	0.176
MICB	50	1	50	0.98	aa_210N	0.176
MICB	50	0	50	0.02	aa_211del	0.176
MICB	50	1	50	0.98	aa_211V	0.176
MICB	50	0	50	0.02	aa_212del	0.176
MICB	50	0.93	50	0.96	aa_212T	0.37
MICB	50	0.07	50	0.02	aa_212I	0.0986
MICB	50	0	50	0.02	aa_213del	0.176
MICB	50	1	50	0.98	aa_213C	0.176
MICB	50	0	50	0.02	aa_214del	0.176
MICB	50	1	50	0.98	aa_214S	0.176
MICB	50	0	50	0.02	aa_215del	0.176
MICB	50	1	50	0.98	aa_215E	0.176
MICB	50	1	50	0.98	aa_216V	0.176
MICB	50	0	50	0.02	aa_216del	0.176
MICB	50	1	50	0.98	aa_217S	0.176
MICB	50	0	50	0.02	aa_217del	0.176
MICB	50	0	50	0.02	aa_218del	0.176
MICB	50	1	50	0.98	aa_218E	0.176
MICB	50	1	50	0.98	aa_219G	0.176
MICB	50	0	50	0.02	aa_219del	0.176
MICB	50	1	50	0.98	aa_220N	0.176
MICB	50	0	50	0.02	aa_220del	0.176
MICB	50	0	50	0.02	aa_221del	0.176
MICB	50	1	50	0.98	aa_221I	0.176
MICB	50	0	50	0.02	aa_222del	0.176
MICB	50	1	50	0.98	aa_222T	0.176
MICB	50	0	50	0.02	aa_223del	0.176
MICB	50	1	50	0.98	aa_223V	0.176
MICB	50	1	50	0.98	aa_224T	0.176
MICB	50	0	50	0.02	aa_224del	0.176
MICB	50	0	50	0.02	aa_225del	0.176
MICB	50	1	50	0.98	aa_225C	0.176
MICB	50	1	50	0.98	aa_226R	0.176
MICB	50	0	50	0.02	aa_226del	0.176
MICB	50	1	50	0.98	aa_227A	0.176
MICB	50	0	50	0.02	aa_227del	0.176
MICB	50	0	50	0.02	aa_228del	0.176
MICB	50	1	50	0.98	aa_228S	0.176
MICB	50	1	50	0.98	aa_229S	0.176
MICB	50	0	50	0.02	aa_229del	0.176
MICB	50	0	50	0.02	aa_230del	0.176
MICB	50	1	50	0.98	aa_230F	0.176
MICB	50	0	50	0.02	aa_231del	0.176
MICB	50	1	50	0.98	aa_231Y	0.176
MICB	50	0	50	0.02	aa_232del	0.176
MICB	50	1	50	0.98	aa_232P	0.176
MICB	50	1	50	0.98	aa_233R	0.176
MICB	50	0	50	0.02	aa_233del	0.176
MICB	50	1	50	0.98	aa_234N	0.176
MICB	50	0	50	0.02	aa_234del	0.176
MICB	50	0	50	0.02	aa_235del	0.176
MICB	50	1	50	0.98	aa_235I	0.176
MICB	50	1	50	0.98	aa_236T	0.176
MICB	50	0	50	0.02	aa_236del	0.176
MICB	50	1	50	0.98	aa_237L	0.176
MICB	50	0	50	0.02	aa_237del	0.176
MICB	50	1	50	0.98	aa_238T	0.176
MICB	50	0	50	0.02	aa_238del	0.176
MICB	50	1	50	0.98	aa_239W	0.176
MICB	50	0	50	0.02	aa_239del	0.176
MICB	50	0	50	0.02	aa_240del	0.176
MICB	50	1	50	0.98	aa_240R	0.176
MICB	50	1	50	0.98	aa_241Q	0.176
MICB	50	0	50	0.02	aa_241del	0.176
MICB	50	1	50	0.98	aa_242D	0.176
MICB	50	0	50	0.02	aa_242del	0.176
MICB	50	1	50	0.98	aa_243G	0.176
MICB	50	0	50	0.02	aa_243del	0.176
MICB	50	1	50	0.98	aa_244V	0.176
MICB	50	0	50	0.02	aa_244del	0.176
MICB	50	1	50	0.98	aa_245S	0.176
MICB	50	0	50	0.02	aa_245del	0.176
MICB	50	1	50	0.98	aa_246L	0.176
MICB	50	0	50	0.02	aa_246del	0.176
MICB	50	0	50	0.02	aa_247del	0.176
MICB	50	1	50	0.98	aa_247S	0.176
MICB	50	1	50	0.98	aa_248H	0.176
MICB	50	0	50	0.02	aa_248del	0.176
MICB	50	1	50	0.98	aa_249N	0.176
MICB	50	0	50	0.02	aa_249del	0.176
MICB	50	1	50	0.98	aa_250T	0.176
MICB	50	0	50	0.02	aa_250del	0.176
MICB	50	1	50	0.98	aa_251Q	0.176
MICB	50	0	50	0.02	aa_251del	0.176
MICB	50	1	50	0.98	aa_252Q	0.176
MICB	50	0	50	0.02	aa_252del	0.176
MICB	50	1	50	0.98	aa_253W	0.176
MICB	50	0	50	0.02	aa_253del	0.176
MICB	50	1	50	0.98	aa_254G	0.176
MICB	50	0	50	0.02	aa_254del	0.176
MICB	50	1	50	0.98	aa_255D	0.176
MICB	50	0	50	0.02	aa_255del	0.176
MICB	50	1	50	0.98	aa_256V	0.176
MICB	50	0	50	0.02	aa_256del	0.176
MICB	50	0	50	0.02	aa_257del	0.176
MICB	50	1	50	0.98	aa_257L	0.176
MICB	50	0	50	0.02	aa_258del	0.176
MICB	50	1	50	0.98	aa_258P	0.176
MICB	50	1	50	0.98	aa_259D	0.176
MICB	50	0	50	0.02	aa_259del	0.176
MICB	50	0	50	0.02	aa_260del	0.176
MICB	50	1	50	0.98	aa_260G	0.176
MICB	50	1	50	0.98	aa_261N	0.176
MICB	50	0	50	0.02	aa_261del	0.176
MICB	50	0	50	0.02	aa_262del	0.176
MICB	50	1	50	0.98	aa_262G	0.176
MICB	50	1	50	0.98	aa_263T	0.176
MICB	50	0	50	0.02	aa_263del	0.176
MICB	50	1	50	0.98	aa_264Y	0.176
MICB	50	0	50	0.02	aa_264del	0.176
MICB	50	0	50	0.02	aa_265del	0.176
MICB	50	1	50	0.98	aa_265Q	0.176
MICB	50	0	50	0.02	aa_266del	0.176
MICB	50	1	50	0.98	aa_266T	0.176
MICB	50	0	50	0.02	aa_267del	0.176
MICB	50	1	50	0.98	aa_267W	0.176
MICB	50	0	50	0.02	aa_268del	0.176
MICB	50	1	50	0.98	aa_268V	0.176
MICB	50	0	50	0.02	aa_269del	0.176
MICB	50	1	50	0.98	aa_269A	0.176
MICB	50	0	50	0.02	aa_270del	0.176
MICB	50	1	50	0.98	aa_270T	0.176
MICB	50	0	50	0.02	aa_271del	0.176
MICB	50	1	50	0.98	aa_271R	0.176
MICB	50	0	50	0.02	aa_272del	0.176
MICB	50	1	50	0.98	aa_272I	0.176
MICB	50	1	50	0.98	aa_273R	0.176
MICB	50	0	50	0.02	aa_273del	0.176
MICB	50	0	50	0.02	aa_274del	0.176
MICB	50	1	50	0.98	aa_274Q	0.176
MICB	50	1	50	0.98	aa_275G	0.176
MICB	50	0	50	0.02	aa_275del	0.176
MICB	50	1	50	0.98	aa_276E	0.176
MICB	50	0	50	0.02	aa_276del	0.176
MICB	50	0	50	0.02	aa_277del	0.176
MICB	50	1	50	0.98	aa_277E	0.176
MICB	50	1	50	0.98	aa_278Q	0.176
MICB	50	0	50	0.02	aa_278del	0.176
MICB	50	0	50	0.02	aa_279del	0.176
MICB	50	1	50	0.98	aa_279R	0.176
MICB	50	0	50	0.02	aa_280del	0.176
MICB	50	1	50	0.98	aa_280F	0.176
MICB	50	0	50	0.02	aa_281del	0.176
MICB	50	1	50	0.98	aa_281T	0.176
MICB	50	0	50	0.02	aa_282del	0.176
MICB	50	1	50	0.98	aa_282C	0.176
MICB	50	1	50	0.98	aa_283Y	0.176
MICB	50	0	50	0.02	aa_283del	0.176
MICB	50	0	50	0.02	aa_284del	0.176
MICB	50	1	50	0.98	aa_284M	0.176
MICB	50	0	50	0.02	aa_285del	0.176
MICB	50	1	50	0.98	aa_285E	0.176
MICB	50	0	50	0.02	aa_286del	0.176
MICB	50	1	50	0.98	aa_286H	0.176
MICB	50	0	50	0.02	aa_287del	0.176
MICB	50	1	50	0.98	aa_287S	0.176
MICB	50	1	50	0.98	aa_288G	0.176
MICB	50	0	50	0.02	aa_288del	0.176
MICB	50	0	50	0.02	aa_289del	0.176
MICB	50	1	50	0.98	aa_289N	0.176
MICB	50	0	50	0.02	aa_290del	0.176
MICB	50	1	50	0.98	aa_290H	0.176
MICB	50	0.03	50	0.02	aa_291S	0.618
MICB	50	0.97	50	0.96	aa_291G	0.744
MICB	50	0	50	0.02	aa_291del	0.176
MICB	50	1	50	0.98	aa_292T	0.176
MICB	50	0	50	0.02	aa_292del	0.176
MICB	50	0	50	0.02	aa_293del	0.176
MICB	50	1	50	0.98	aa_293H	0.176
MICB	50	0	50	0.02	aa_294del	0.176
MICB	50	1	50	0.98	aa_294P	0.176
MICB	50	1	50	0.98	aa_295V	0.176
MICB	50	0	50	0.02	aa_295del	0.176
MICB	50	0	50	0.02	aa_296del	0.176
MICB	50	1	50	0.98	aa_296P	0.176
MICB	50	0	50	0.02	aa_297del	0.176
MICB	50	1	50	0.98	aa_297S	0.176
MICB	50	0	50	0.02	aa_298del	0.176
MICB	50	1	50	0.98	aa_298G	0.176
MICB	50	1	50	0.98	aa_299K	0.176
MICB	50	0	50	0.02	aa_299del	0.176
MICB	50	1	50	0.98	aa_300A	0.176
MICB	50	0	50	0.02	aa_300del	0.176
MICB	50	0	50	0.02	aa_301del	0.176
MICB	50	1	50	0.98	aa_301L	0.176
MICB	50	1	50	0.98	aa_302V	0.176
MICB	50	0	50	0.02	aa_302del	0.176
MICB	50	0	50	0.02	aa_303del	0.176
MICB	50	1	50	0.98	aa_303L	0.176
MICB	50	0	50	0.02	aa_304del	0.176
MICB	50	1	50	0.98	aa_304Q	0.176
MICB	50	0	50	0.02	aa_305del	0.176
MICB	50	1	50	0.98	aa_305S	0.176
MICB	50	0	50	0.02	aa_306del	0.176
MICB	50	1	50	0.98	aa_306Q	0.176
MICB	50	1	50	0.98	aa_307R	0.176
MICB	50	0	50	0.02	aa_307del	0.176
MICB	50	0	50	0.02	aa_308del	0.176
MICB	50	1	50	0.98	aa_308T	0.176
MICB	50	0	50	0.02	aa_309del	0.176
MICB	50	1	50	0.98	aa_309D	0.176
MICB	50	0	50	0.02	aa_310del	0.176
MICB	50	1	50	0.98	aa_310F	0.176
MICB	50	1	50	0.98	aa_311P	0.176
MICB	50	0	50	0.02	aa_311del	0.176
MICB	50	0	50	0.02	aa_312del	0.176
MICB	50	1	50	0.98	aa_312Y	0.176
MICB	50	1	50	0.98	aa_313V	0.176
MICB	50	0	50	0.02	aa_313del	0.176
MICB	50	0	50	0.02	aa_314del	0.176
MICB	50	1	50	0.98	aa_314S	0.176
MICB	50	1	50	0.98	aa_315A	0.176
MICB	50	0	50	0.02	aa_315del	0.176
MICB	50	0	50	0.02	aa_316del	0.176
MICB	50	1	50	0.98	aa_316A	0.176
MICB	50	0	50	0.02	aa_317del	0.176
MICB	50	1	50	0.98	aa_317M	0.176
MICB	50	1	50	0.98	aa_318P	0.176
MICB	50	0	50	0.02	aa_318del	0.176
MICB	50	1	50	0.98	aa_319C	0.176
MICB	50	0	50	0.02	aa_319del	0.176
MICB	50	0	50	0.02	aa_320del	0.176
MICB	50	1	50	0.98	aa_320F	0.176
MICB	50	1	50	0.98	aa_321V	0.176
MICB	50	0	50	0.02	aa_321del	0.176
MICB	50	1	50	0.98	aa_322I	0.176
MICB	50	0	50	0.02	aa_322del	0.176
MICB	50	0	50	0.02	aa_323del	0.176
MICB	50	1	50	0.98	aa_323I	0.176
MICB	50	1	50	0.98	aa_324I	0.176
MICB	50	0	50	0.02	aa_324del	0.176
MICB	50	1	50	0.98	aa_325I	0.176
MICB	50	0	50	0.02	aa_325del	0.176
MICB	50	0	50	0.02	aa_326del	0.176
MICB	50	1	50	0.98	aa_326L	0.176
MICB	50	1	50	0.98	aa_327C	0.176
MICB	50	0	50	0.02	aa_327del	0.176
MICB	50	1	50	0.98	aa_328V	0.176
MICB	50	0	50	0.02	aa_328del	0.176
MICB	50	1	50	0.98	aa_329P	0.176
MICB	50	0	50	0.02	aa_329del	0.176
MICB	50	1	50	0.98	aa_330C	0.176
MICB	50	0	50	0.02	aa_330del	0.176
MICB	50	1	50	0.98	aa_331C	0.176
MICB	50	0	50	0.02	aa_331del	0.176
MICB	50	0	50	0.02	aa_332del	0.176
MICB	50	1	50	0.98	aa_332K	0.176
MICB	50	1	50	0.98	aa_333K	0.176
MICB	50	0	50	0.02	aa_333del	0.176
MICB	50	0	50	0.02	aa_334del	0.176
MICB	50	1	50	0.98	aa_334K	0.176
MICB	50	1	50	0.98	aa_335T	0.176
MICB	50	0	50	0.02	aa_335del	0.176
MICB	50	0	50	0.02	aa_336del	0.176
MICB	50	1	50	0.98	aa_336S	0.176
MICB	50	0	50	0.02	aa_337del	0.176
MICB	50	1	50	0.98	aa_337A	0.176
MICB	50	0	50	0.02	aa_338del	0.176
MICB	50	1	50	0.98	aa_338A	0.176
MICB	50	0	50	0.02	aa_339del	0.176
MICB	50	1	50	0.98	aa_339E	0.176
MICB	50	1	50	0.98	aa_340G	0.176
MICB	50	0	50	0.02	aa_340del	0.176
MICB	50	0	50	0.02	aa_341del	0.176
MICB	50	1	50	0.98	aa_341P	0.176
MICB	50	1	50	0.98	aa_342E	0.176
MICB	50	0	50	0.02	aa_342del	0.176
MICB	50	1	50	0.98	aa_343L	0.176
MICB	50	0	50	0.02	aa_343del	0.176
MICB	50	0	50	0.02	aa_344del	0.176
MICB	50	1	50	0.98	aa_344V	0.176
MICB	50	0	50	0.02	aa_345del	0.176
MICB	50	1	50	0.98	aa_345S	0.176
MICB	50	0	50	0.02	aa_346del	0.176
MICB	50	1	50	0.98	aa_346L	0.176
MICB	50	0	50	0.02	aa_347del	0.176
MICB	50	1	50	0.98	aa_347Q	0.176
MICB	50	0	50	0.02	aa_348del	0.176
MICB	50	1	50	0.98	aa_348V	0.176
MICB	50	1	50	0.98	aa_349L	0.176
MICB	50	0	50	0.02	aa_349del	0.176
MICB	50	1	50	0.98	aa_350D	0.176
MICB	50	0	50	0.02	aa_350del	0.176
MICB	50	0	50	0.02	aa_351del	0.176
MICB	50	1	50	0.98	aa_351Q	0.176
MICB	50	0	50	0.02	aa_352del	0.176
MICB	50	1	50	0.98	aa_352H	0.176
MICB	50	0	50	0.02	aa_353del	0.176
MICB	50	1	50	0.98	aa_353P	0.176
MICB	50	1	50	0.98	aa_354V	0.176
MICB	50	0	50	0.02	aa_354del	0.176
MICB	50	1	50	0.98	aa_355G	0.176
MICB	50	0	50	0.02	aa_355del	0.176
MICB	50	0	50	0.02	aa_356del	0.176
MICB	50	1	50	0.98	aa_356T	0.176
MICB	50	1	50	0.98	aa_357G	0.176
MICB	50	0	50	0.02	aa_357del	0.176
MICB	50	0	50	0.02	aa_358del	0.176
MICB	50	1	50	0.98	aa_358D	0.176
MICB	50	0	50	0.02	aa_359del	0.176
MICB	50	1	50	0.98	aa_359H	0.176
MICB	50	1	50	0.98	aa_360R	0.176
MICB	50	0	50	0.02	aa_360del	0.176
MICB	50	0	50	0.02	aa_361del	0.176
MICB	50	1	50	0.98	aa_361D	0.176
MICB	50	1	50	0.98	aa_362A	0.176
MICB	50	0	50	0.02	aa_362del	0.176
MICB	50	0	50	0.02	aa_363del	0.176
MICB	50	1	50	0.98	aa_363A	0.176
MICB	50	0	50	0.02	aa_364del	0.176
MICB	50	1	50	0.98	aa_364Q	0.176
MICB	50	1	50	0.98	aa_365L	0.176
MICB	50	0	50	0.02	aa_365del	0.176
MICB	50	1	50	0.98	aa_366G	0.176
MICB	50	0	50	0.02	aa_366del	0.176
MICB	50	1	50	0.98	aa_367F	0.176
MICB	50	0	50	0.02	aa_367del	0.176
MICB	50	0	50	0.02	aa_368del	0.176
MICB	50	1	50	0.98	aa_368Q	0.176
MICB	50	1	50	0.98	aa_369P	0.176
MICB	50	0	50	0.02	aa_369del	0.176
MICB	50	1	50	0.98	aa_370L	0.176
MICB	50	0	50	0.02	aa_370del	0.176
MICB	50	0	50	0.02	aa_371del	0.176
MICB	50	1	50	0.98	aa_371M	0.176
MICB	50	1	50	0.98	aa_372S	0.176
MICB	50	0	50	0.02	aa_372del	0.176
MICB	50	0	50	0.02	aa_373del	0.176
MICB	50	1	50	0.98	aa_373A	0.176
MICB	50	0	50	0.02	aa_374del	0.176
MICB	50	1	50	0.98	aa_374T	0.176
MICB	50	0	50	0.02	aa_375del	0.176
MICB	50	1	50	0.98	aa_375G	0.176
MICB	50	1	50	0.98	aa_376S	0.176
MICB	50	0	50	0.02	aa_376del	0.176
MICB	50	0	50	0.02	aa_377del	0.176
MICB	50	1	50	0.98	aa_377T	0.176
MICB	50	1	50	0.98	aa_378G	0.176
MICB	50	0	50	0.02	aa_378del	0.176
MICB	50	1	50	0.98	aa_379S	0.176
MICB	50	0	50	0.02	aa_379del	0.176
MICB	50	0	50	0.02	aa_380del	0.176
MICB	50	1	50	0.98	aa_380T	0.176
MICB	50	1	50	0.98	aa_381E	0.176
MICB	50	0	50	0.02	aa_381del	0.176
MICB	50	0	50	0.02	aa_382del	0.176
MICB	50	1	50	0.98	aa_382G	0.176
MICB	50	0.17	50	0.23	aa_383T	0.335
MICB	50	0	50	0.02	aa_383del	0.176
MICB	50	0.83	50	0.75	aa_383A	0.205
MICB	50	0	50	0.02	aa_384del	0.176
MICB	50	1	50	0.98	aa_384X	0.176
TAP1	50	0.99	50	0.99	aa_244V	0.979
TAP1	50	0.01	50	0.01	aa_244L	0.979
TAP1	50	0.01	50	0.01	aa_286F	0.922
TAP1	50	0.99	50	0.99	aa_286S	0.922
TAP1	50	0.16	50	0.22	aa_333V	0.246
TAP1	50	0.84	50	0.78	aa_333I	0.246
TAP1	50	0.01	50	0.04	aa_370V	0.144
TAP1	50	0.99	50	0.96	aa_370A	0.144
TAP1	50	0.01	50	0	aa_419C	0.309
TAP1	50	0.99	50	1	aa_419G	0.309
TAP1	50	0.05	50	0.04	aa_458L	0.789
TAP1	50	0.95	50	0.96	aa_458V	0.789
TAP1	50	0.01	50	0.04	aa_518I	0.144
TAP1	50	0.99	50	0.96	aa_518V	0.144
TAP1	50	0.92	50	0.85	aa_637D	0.145
TAP1	50	0.08	50	0.15	aa_637G	0.145
TAP1	50	0.99	50	0.99	aa_648R	0.941
TAP1	50	0.01	50	0.01	aa_648Q	0.941
TAP2	50	0.01	50	0	aa_2W	0.42
TAP2	50	0.99	50	1	aa_2R	0.42
TAP2	50	0.02	50	0.03	aa_313H	0.565
TAP2	50	0.98	50	0.97	aa_313R	0.565
TAP2	50	0.97	50	0.99	aa_374A	0.51
TAP2	50	0.03	50	0.01	aa_374T	0.51
TAP2	50	0.89	50	0.9	aa_379V	0.84
TAP2	50	0.11	50	0.1	aa_379I	0.84
[truncated: 44 more rows]

## Sheet: Covid-19+women vs Covid-19-men 
Gene	N(Covid-19[-] men)	Frequency(Covid-19[-] men)	N(Covid-19[+] women)	Frequency(Covid-19[+] women)	aa_residue	P-value
HLA-A	28	0.482143	28	0.392857	aa_10V	0.379
HLA-A	28	0.517857	28	0.607143	aa_10L	0.379
HLA-A	28	0.803571	28	0.75	aa_14S	0.5868
HLA-A	28	0.196429	28	0.25	aa_14L	0.587
HLA-A	28	0.178571	28	0.125	aa_33T	0.39048
HLA-A	28	0.392857	28	0.535714	aa_33F	0.1113
HLA-A	28	0.178571	28	0.232143	aa_33Y	0.4259
HLA-A	28	0.25	28	0.107143	aa_33S	0.103
HLA-A	28	0.0357143	28	0	aa_36M	0.1502
HLA-A	28	0.964286	28	1	aa_36V	0.15
HLA-A	28	0.0535714	28	0.0357143	aa_41S	0.8004
HLA-A	28	0.946429	28	0.964286	aa_41R	0.8
HLA-A	28	0.0178571	28	0.0178571	aa_67R	0.828
HLA-A	28	0.982143	28	0.982143	aa_67Q	0.828
HLA-A	28	0.107143	28	0.0714286	aa_68K	0.32372
HLA-A	28	0.892857	28	0.928571	aa_68R	0.324
HLA-A	28	0.0892857	28	0.0892857	aa_80R	0.831
HLA-A	28	0.910714	28	0.910714	aa_80G	0.8311
HLA-A	28	0.125	28	0.0892857	aa_86R	0.56276
HLA-A	28	0.196429	28	0.0714286	aa_86E	0.0467
HLA-A	28	0.375	28	0.535714	aa_86Q	0.0401
HLA-A	28	0.232143	28	0.232143	aa_86G	0.7115
HLA-A	28	0.0714286	28	0.0714286	aa_86L	0.56478
HLA-A	28	0.125	28	0.0892857	aa_87N	0.56276
HLA-A	28	0.803571	28	0.839286	aa_87E	0.3489
HLA-A	28	0.0714286	28	0.0714286	aa_87Q	0.56478
HLA-A	28	0.803571	28	0.928571	aa_89R	0.0467
HLA-A	28	0.196429	28	0.0714286	aa_89G	0.0467
HLA-A	28	0.428571	28	0.303571	aa_90K	0.2742
HLA-A	28	0.571429	28	0.696429	aa_90N	0.274
HLA-A	28	0.892857	28	0.928571	aa_91V	0.324
HLA-A	28	0.107143	28	0.0714286	aa_91M	0.32372
HLA-A	28	0.285714	28	0.392857	aa_94Q	0.4777
HLA-A	28	0.714286	28	0.607143	aa_94H	0.47774
HLA-A	28	0.875	28	0.946429	aa_97T	0.284
HLA-A	28	0.125	28	0.0535714	aa_97I	0.28356
HLA-A	28	0.214286	28	0.232143	aa_98H	0.4896
HLA-A	28	0.785714	28	0.767857	aa_98D	0.4896
HLA-A	28	0.25	28	0.232143	aa_100E	0.9878
HLA-A	28	0.553571	28	0.607143	aa_100V	0.3457
HLA-A	28	0.196429	28	0.160714	aa_100A	0.24094
HLA-A	28	0.553571	28	0.607143	aa_101D	0.3457
HLA-A	28	0.428571	28	0.267857	aa_101N	0.02509
HLA-A	28	0.0178571	28	0.125	aa_101S	0.0167
HLA-A	28	0.785714	28	0.803571	aa_103G	0.9298
HLA-A	28	0.214286	28	0.196429	aa_103R	0.9298
HLA-A	28	0.785714	28	0.803571	aa_104T	0.9298
HLA-A	28	0.214286	28	0.196429	aa_104I	0.9298
HLA-A	28	0.214286	28	0.196429	aa_105A	0.9298
HLA-A	28	0.785714	28	0.803571	aa_105L	0.9298
HLA-A	28	0.214286	28	0.196429	aa_106L	0.9298
HLA-A	28	0.785714	28	0.803571	aa_106R	0.9298
HLA-A	28	0.214286	28	0.196429	aa_107R	0.9298
HLA-A	28	0.785714	28	0.803571	aa_107G	0.9298
HLA-A	28	0.785714	28	0.75	aa_114A	0.916
HLA-A	28	0.214286	28	0.25	aa_114D	0.916
HLA-A	28	0.214286	28	0.214286	aa_119V	0.7513
HLA-A	28	0.214286	28	0.0892857	aa_119L	0.0662
HLA-A	28	0.571429	28	0.696429	aa_119I	0.274
HLA-A	28	0.321429	28	0.375	aa_121I	0.6413
HLA-A	28	0.285714	28	0.25	aa_121R	0.8639
HLA-A	28	0.392857	28	0.375	aa_121M	0.8096
HLA-A	28	0.196429	28	0.0714286	aa_123F	0.0467
HLA-A	28	0.803571	28	0.928571	aa_123Y	0.0467
HLA-A	28	0.267857	28	0.357143	aa_129P	0.4553
HLA-A	28	0.732143	28	0.642857	aa_129S	0.45529
HLA-A	28	0.767857	28	0.767857	aa_131G	0.7115
HLA-A	28	0.232143	28	0.232143	aa_131W	0.7115
HLA-A	28	0.982143	28	0.875	aa_133F	0.016702
HLA-A	28	0.0178571	28	0.125	aa_133L	0.0167
HLA-A	28	0.464286	28	0.303571	aa_138H	0.10854
HLA-A	28	0.339286	28	0.464286	aa_138R	0.4432
HLA-A	28	0.142857	28	0.196429	aa_138Q	0.2384
HLA-A	28	0.0535714	28	0.0357143	aa_138E	0.8004
HLA-A	28	0.0535714	28	0.0357143	aa_140H	0.8004
HLA-A	28	0.482143	28	0.660714	aa_140D	0.135
HLA-A	28	0.464286	28	0.303571	aa_140Y	0.10854
HLA-A	28	0.464286	28	0.357143	aa_151K	0.31497
HLA-A	28	0.535714	28	0.642857	aa_151N	0.315
HLA-A	28	0.267857	28	0.285714	aa_166T	0.5871
HLA-A	28	0.732143	28	0.714286	aa_166I	0.5871
HLA-A	28	0.285714	28	0.321429	aa_168Q	0.7631
HLA-A	28	0.714286	28	0.678571	aa_168K	0.763
HLA-A	28	0.732143	28	0.714286	aa_169R	0.5871
HLA-A	28	0.267857	28	0.285714	aa_169H	0.5871
HLA-A	28	0.982143	28	0.964286	aa_173A	0.767
HLA-A	28	0.0178571	28	0.0357143	aa_173T	0.7671
HLA-A	28	0.892857	28	0.928571	aa_174A	0.324
HLA-A	28	0.107143	28	0.0714286	aa_174V	0.32372
HLA-A	28	0.267857	28	0.25	aa_175R	0.77
HLA-A	28	0.732143	28	0.75	aa_175H	0.77
HLA-A	28	0.0714286	28	0.125	aa_176E	0.462
HLA-A	28	0.0178571	28	0	aa_176W	0.4132
HLA-A	28	0.678571	28	0.625	aa_176V	0.71
HLA-A	28	0.196429	28	0.232143	aa_176A	0.8036
HLA-A	28	0.0357143	28	0.0178571	aa_176R	0.5945
HLA-A	28	0.285714	28	0.25	aa_180Q	0.7535
HLA-A	28	0.0714286	28	0.107143	aa_180W	0.5299
HLA-A	28	0.535714	28	0.571429	aa_180L	0.6559
HLA-A	28	0.107143	28	0.0714286	aa_180R	0.32372
HLA-A	28	0.107143	28	0.0714286	aa_182V	0.32372
HLA-A	28	0.892857	28	0.928571	aa_182A	0.324
HLA-A	28	0.928571	28	0.892857	aa_185E	0.5596
HLA-A	28	0.0714286	28	0.107143	aa_185D	0.5596
HLA-A	28	0.785714	28	0.75	aa_187T	0.8411
HLA-A	28	0.214286	28	0.25	aa_187R	0.8411
HLA-A	28	0.696429	28	0.857143	aa_190E	0.0116
HLA-A	28	0.303571	28	0.142857	aa_190D	0.01157
HLA-A	28	0.303571	28	0.142857	aa_191G	0.01157
HLA-A	28	0.696429	28	0.857143	aa_191W	0.0116
HLA-A	28	0.0535714	28	0	aa_195H	0.06451
HLA-A	28	0.946429	28	1	aa_195Y	0.0645
HLA-A	28	0.571429	28	0.5	aa_208P	0.37481
HLA-A	28	0.428571	28	0.5	aa_208A	0.3748
HLA-A	28	0.0178571	28	0	aa_210R	0.23027
HLA-A	28	0.982143	28	1	aa_210K	0.23
HLA-A	28	0.482143	28	0.535714	aa_217A	0.5527
HLA-A	28	0.517857	28	0.464286	aa_217P	0.55268
HLA-A	28	0.517857	28	0.464286	aa_218I	0.55268
HLA-A	28	0.482143	28	0.535714	aa_218V	0.5527
HLA-A	28	0.482143	28	0.571429	aa_231S	0.2969
HLA-A	28	0.517857	28	0.428571	aa_231G	0.2969
HLA-A	28	0.0357143	28	0.0535714	aa_269V	0.7474
HLA-A	28	0.964286	28	0.946429	aa_269A	0.747
HLA-A	28	0.785714	28	0.732143	aa_270A	0.6112
HLA-A	28	0.214286	28	0.267857	aa_270S	0.6112
HLA-A	28	0.517857	28	0.410714	aa_277E	0.2238
HLA-A	28	0.482143	28	0.589286	aa_277Q	0.224
HLA-A	28	0.321429	28	0.357143	aa_300L	0.7593
HLA-A	28	0.678571	28	0.642857	aa_300P	0.7593
HLA-A	28	0.196429	28	0.0714286	aa_306V	0.0467
HLA-A	28	0.803571	28	0.928571	aa_306I	0.0467
HLA-A	28	0.0178571	28	0	aa_307H	0.3269
HLA-A	28	0.982143	28	1	aa_307P	0.327
HLA-A	28	0.482143	28	0.571429	aa_318F	0.2969
HLA-A	28	0.517857	28	0.428571	aa_318L	0.2969
HLA-A	28	0.0178571	28	0.125	aa_321M	0.0167
HLA-A	28	0.982143	28	0.875	aa_321V	0.016702
HLA-A	28	0.803571	28	0.75	aa_322I	0.5868
HLA-A	28	0.196429	28	0.25	aa_322F	0.587
HLA-A	28	0.214286	28	0.285714	aa_323A	0.5075
HLA-A	28	0.785714	28	0.714286	aa_323T	0.5075
HLA-A	28	0.821429	28	0.75	aa_331M	0.4435
HLA-A	28	0.178571	28	0.25	aa_331R	0.4435
HLA-A	28	0.785714	28	0.928571	aa_335K	0.0399
HLA-A	28	0.214286	28	0.0714286	aa_335N	0.0399
HLA-A	28	0.678571	28	0.642857	aa_345S	0.7593
HLA-A	28	0.321429	28	0.357143	aa_345T	0.7593
HLA-A	28	0.196429	28	0.285714	aa_358M	0.3521
HLA-A	28	0.803571	28	0.714286	aa_358V	0.35209
HLA-B	28	0.303571	28	0.25	aa_2L	0.48794
HLA-B	28	0.696429	28	0.75	aa_2R	0.4879
HLA-B	28	0.696429	28	0.75	aa_4T	0.4879
HLA-B	28	0.303571	28	0.25	aa_4M	0.48794
HLA-B	28	0.321429	28	0.303571	aa_9L	0.988
HLA-B	28	0.678571	28	0.696429	aa_9V	0.9878
HLA-B	28	0.571429	28	0.589286	aa_14W	0.647
HLA-B	28	0.428571	28	0.410714	aa_14S	0.647
HLA-B	28	0.642857	28	0.678571	aa_15G	0.5021
HLA-B	28	0.357143	28	0.321429	aa_15A	0.5021
HLA-B	28	0.571429	28	0.571429	aa_17V	0.7963
HLA-B	28	0.428571	28	0.428571	aa_17L	0.7963
HLA-B	28	0.107143	28	0.0535714	aa_33D	0.21677
HLA-B	28	0.214286	28	0.178571	aa_33H	0.51292
HLA-B	28	0.678571	28	0.767857	aa_33Y	0.141
HLA-B	28	0.75	28	0.75	aa_35A	0.8951
HLA-B	28	0.25	28	0.25	aa_35S	0.8951
HLA-B	28	0.678571	28	0.696429	aa_36M	0.8154
HLA-B	28	0.321429	28	0.303571	aa_36V	0.8154
HLA-B	28	0.375	28	0.357143	aa_48S	0.7019
HLA-B	28	0.303571	28	0.267857	aa_48T	0.7374
HLA-B	28	0.321429	28	0.375	aa_48A	0.5386
HLA-B	28	0.910714	28	0.910714	aa_54D	0.908
HLA-B	28	0.0892857	28	0.0892857	aa_54G	0.908
HLA-B	28	0.285714	28	0.25	aa_56L	0.7103
HLA-B	28	0.714286	28	0.75	aa_56Q	0.7103
HLA-B	28	0.714286	28	0.732143	aa_65A	0.872
HLA-B	28	0.285714	28	0.267857	aa_65T	0.8723
HLA-B	28	0.285714	28	0.357143	aa_69T	0.5377
HLA-B	28	0.142857	28	0.107143	aa_69M	0.6977
HLA-B	28	0.267857	28	0.25	aa_69K	0.8431
HLA-B	28	0.303571	28	0.285714	aa_69E	0.805
HLA-B	28	0.142857	28	0.107143	aa_70A	0.6977
HLA-B	28	0.857143	28	0.892857	aa_70E	0.698
HLA-B	28	0.928571	28	0.964286	aa_86R	0.577
HLA-B	28	0.0714286	28	0.0357143	aa_86G	0.577
HLA-B	28	0.464286	28	0.410714	aa_87E	0.8822
HLA-B	28	0.535714	28	0.589286	aa_87N	0.8822
HLA-B	28	0.892857	28	0.928571	aa_89Q	0.55
HLA-B	28	0.107143	28	0.0714286	aa_89R	0.54981
HLA-B	28	0.107143	28	0.0714286	aa_90N	0.54981
HLA-B	28	0.892857	28	0.928571	aa_90I	0.55
HLA-B	28	0.0535714	28	0.125	aa_91Y	0.2229
HLA-B	28	0.125	28	0.107143	aa_91C	0.6849
HLA-B	28	0.285714	28	0.267857	aa_91F	0.634
HLA-B	28	0.107143	28	0.0714286	aa_91M	0.54981
HLA-B	28	0.428571	28	0.428571	aa_91S	0.7666
HLA-B	28	0.178571	28	0.196429	aa_93A	0.808
HLA-B	28	0.821429	28	0.803571	aa_93T	0.808
HLA-B	28	0.0535714	28	0.125	aa_94Q	0.2229
HLA-B	28	0.107143	28	0.0714286	aa_94S	0.54981
HLA-B	28	0.821429	28	0.803571	aa_94N	0.808
HLA-B	28	0.0178571	28	0	aa_94K	0.4383
HLA-B	28	0.178571	28	0.196429	aa_95A	0.808
HLA-B	28	0.821429	28	0.803571	aa_95T	0.808
HLA-B	28	0.285714	28	0.25	aa_98D	0.49157
HLA-B	28	0.714286	28	0.75	aa_98Y	0.492
HLA-B	28	0.0178571	28	0	aa_101D	0.4383
HLA-B	28	0.375	28	0.428571	aa_101N	0.3225
HLA-B	28	0.607143	28	0.571429	aa_101S	0.41669
HLA-B	28	0.607143	28	0.571429	aa_104N	0.41669
HLA-B	28	0.196429	28	0.178571	aa_104T	0.9665
HLA-B	28	0.196429	28	0.25	aa_104I	0.4137
HLA-B	28	0.625	28	0.571429	aa_105L	0.3225
HLA-B	28	0.375	28	0.428571	aa_105A	0.3225
HLA-B	28	0.392857	28	0.428571	aa_106L	0.4167
HLA-B	28	0.607143	28	0.571429	aa_106R	0.41669
HLA-B	28	0.392857	28	0.428571	aa_107R	0.4167
HLA-B	28	0.607143	28	0.571429	aa_107G	0.41669
HLA-B	28	0.625	28	0.660714	aa_118T	0.7209
HLA-B	28	0.375	28	0.339286	aa_118I	0.7209
HLA-B	28	0.375	28	0.339286	aa_119I	0.7209
HLA-B	28	0.160714	28	0.196429	aa_119W	0.607
HLA-B	28	0.464286	28	0.464286	aa_119L	0.953
HLA-B	28	0.571429	28	0.589286	aa_121R	0.8363
HLA-B	28	0.0892857	28	0.142857	aa_121T	0.2124
HLA-B	28	0.196429	28	0.178571	aa_121S	0.8983
HLA-B	28	0.0714286	28	0.0714286	aa_121W	0.8715
HLA-B	28	0.0535714	28	0.0178571	aa_121V	0.5073
HLA-B	28	0.0178571	28	0	aa_121N	0.4383
HLA-B	28	0.75	28	0.785714	aa_127V	0.3208
HLA-B	28	0.25	28	0.214286	aa_127L	0.3208
HLA-B	28	0.982143	28	0.982143	aa_133L	0.733
HLA-B	28	0.0178571	28	0.0178571	aa_133F	0.7329
HLA-B	28	0.642857	28	0.696429	aa_137H	0.4077
HLA-B	28	0.357143	28	0.303571	aa_137Y	0.4077
HLA-B	28	0.0535714	28	0.0357143	aa_138H	0.57639
HLA-B	28	0.482143	28	0.553571	aa_138D	0.4499
HLA-B	28	0.464286	28	0.410714	aa_138N	0.54982
HLA-B	28	0.178571	28	0.178571	aa_140D	0.8787
HLA-B	28	0.125	28	0.0892857	aa_140F	0.41102
HLA-B	28	0.339286	28	0.375	aa_140Y	0.5583
HLA-B	28	0.0892857	28	0.0714286	aa_140L	0.5322
HLA-B	28	0.267857	28	0.285714	aa_140S	0.8935
HLA-B	28	0.214286	28	0.214286	aa_155R	0.9403
HLA-B	28	0.785714	28	0.785714	aa_155S	0.9403
HLA-B	28	0.982143	28	0.982143	aa_167T	0.2803
HLA-B	28	0.0178571	28	0.0178571	aa_167S	0.28032
HLA-B	28	0.982143	28	0.982143	aa_169R	0.906
HLA-B	28	0.0178571	28	0.0178571	aa_169L	0.9061
HLA-B	28	0.982143	28	0.982143	aa_171W	0.2803
HLA-B	28	0.0178571	28	0.0178571	aa_171L	0.28032
HLA-B	28	0.696429	28	0.589286	aa_176V	0.32895
HLA-B	28	0.303571	28	0.410714	aa_176E	0.3289
HLA-B	28	0.0357143	28	0.0357143	aa_180W	0.886
HLA-B	28	0.696429	28	0.625	aa_180L	0.5991
HLA-B	28	0.0892857	28	0.125	aa_180R	0.7072
HLA-B	28	0.178571	28	0.214286	aa_180D	0.7688
HLA-B	28	0.0357143	28	0.0178571	aa_182T	0.47839
HLA-B	28	0.964286	28	0.982143	aa_182A	0.478
HLA-B	28	0.142857	28	0.160714	aa_187E	0.5249
HLA-B	28	0.553571	28	0.589286	aa_187L	0.6527
HLA-B	28	0.303571	28	0.25	aa_187T	0.3186
HLA-B	28	0.821429	28	0.821429	aa_191W	0.9988
HLA-B	28	0.178571	28	0.178571	aa_191S	0.9988
HLA-B	28	0.214286	28	0.285714	aa_195H	0.3488
HLA-B	28	0.785714	28	0.714286	aa_195Y	0.3488
HLA-B	28	0.178571	28	0.196429	aa_201D	0.7817
HLA-B	28	0.821429	28	0.803571	aa_201E	0.7817
HLA-B	28	0.0714286	28	0.125	aa_202K	0.1942
HLA-B	28	0.928571	28	0.875	aa_202T	0.19418
HLA-B	28	0.821429	28	0.803571	aa_204Q	0.7817
HLA-B	28	0.178571	28	0.196429	aa_204E	0.7817
HLA-B	28	0.803571	28	0.732143	aa_218I	0.383
HLA-B	28	0.196429	28	0.267857	aa_218V	0.383
HLA-B	28	0.160714	28	0.142857	aa_223V	0.9479
HLA-B	28	0.839286	28	0.857143	aa_223A	0.948
HLA-B	28	0.0178571	28	0	aa_269T	0.849
HLA-B	28	0.982143	28	1	aa_269A	0.849
HLA-B	28	0.553571	28	0.5	aa_306V	0.8114
HLA-B	28	0.446429	28	0.5	aa_306I	0.8114
HLA-B	28	0.428571	28	0.5	aa_329T	0.6712
HLA-B	28	0.571429	28	0.5	aa_329A	0.6712
HLA-B	28	0.464286	28	0.410714	aa_349C	0.8813
HLA-B	28	0.535714	28	0.589286	aa_349S	0.8813
HLA-C	28	0	27	0.0185185	aa_7Q	0.33368
HLA-C	28	1	27	0.981481	aa_7R	0.3337
HLA-C	28	0.714286	27	0.722222	aa_8T	0.6464
HLA-C	28	0.285714	27	0.277778	aa_8A	0.6464
HLA-C	28	0.553571	27	0.574074	aa_10I	0.6911
HLA-C	28	0.446429	27	0.425926	aa_10L	0.6911
HLA-C	28	0.714286	27	0.740741	aa_16A	0.4912
HLA-C	28	0.285714	27	0.259259	aa_16G	0.4912
HLA-C	28	1	27	0.981481	aa_20T	0.3337
HLA-C	28	0	27	0.0185185	aa_20I	0.33368
HLA-C	28	0.178571	27	0.240741	aa_25G	0.62167
HLA-C	28	0.821429	27	0.759259	aa_25C	0.6217
HLA-C	28	1	27	0.981481	aa_30R	0.296
HLA-C	28	0	27	0.0185185	aa_30K	0.29595
HLA-C	28	0.482143	27	0.537037	aa_33Y	0.24466
HLA-C	28	0	27	0.0185185	aa_33F	0.29595
HLA-C	28	0.375	27	0.296296	aa_33D	0.16985
HLA-C	28	0.142857	27	0.148148	aa_33S	0.93592
HLA-C	28	0.857143	27	0.833333	aa_35A	0.6982
HLA-C	28	0.142857	27	0.166667	aa_35S	0.6982
HLA-C	28	0.875	27	0.87037	aa_38R	0.8085
HLA-C	28	0.125	27	0.12963	aa_38W	0.80846
HLA-C	28	0.875	27	0.925926	aa_40G	0.567
HLA-C	28	0.125	27	0.0740741	aa_40S	0.56715
HLA-C	28	0.767857	27	0.759259	aa_45R	0.597
HLA-C	28	0.232143	27	0.240741	aa_45H	0.59704
HLA-C	28	0.375	27	0.314815	aa_48S	0.25163
HLA-C	28	0.625	27	0.685185	aa_48A	0.25163
HLA-C	28	0.142857	27	0.185185	aa_59Q	0.3954
HLA-C	28	0.857143	27	0.814815	aa_59R	0.39539
HLA-C	28	0.875	27	0.87037	aa_73A	0.8085
HLA-C	28	0.125	27	0.12963	aa_73E	0.80846
HLA-C	28	0.285714	27	0.240741	aa_90N	0.48506
HLA-C	28	0.714286	27	0.759259	aa_90K	0.4851
HLA-C	28	0.428571	27	0.5	aa_97T	0.17663
HLA-C	28	0.571429	27	0.5	aa_97A	0.17663
HLA-C	28	0.571429	27	0.518519	aa_101S	0.6088
HLA-C	28	0.428571	27	0.481481	aa_101N	0.6088
HLA-C	28	0.571429	27	0.518519	aa_104N	0.6088
HLA-C	28	0.428571	27	0.481481	aa_104K	0.6088
HLA-C	28	0.5	27	0.444444	aa_114D	0.2109
HLA-C	28	0.5	27	0.555556	aa_114A	0.2109
HLA-C	28	0.0357143	27	0.0555556	aa_115R	0.6214
HLA-C	28	0.964286	27	0.944444	aa_115G	0.6214
HLA-C	28	0.0892857	27	0.166667	aa_118I	0.26765
HLA-C	28	0.910714	27	0.833333	aa_118T	0.26765
HLA-C	28	0.0892857	27	0.185185	aa_119I	0.17409
HLA-C	28	0.910714	27	0.814815	aa_119L	0.17409
HLA-C	28	0.767857	27	0.851852	aa_121R	0.35
HLA-C	28	0.232143	27	0.148148	aa_121W	0.34984
HLA-C	28	0.821429	27	0.703704	aa_123Y	0.14413
HLA-C	28	0	27	0.0185185	aa_123C	0.29595
HLA-C	28	0.142857	27	0.166667	aa_123F	0.68854
HLA-C	28	0.0357143	27	0.111111	aa_123S	0.231
HLA-C	28	0.0535714	27	0.0740741	aa_127V	0.7207
HLA-C	28	0.946429	27	0.925926	aa_127L	0.7207
HLA-C	28	0.964286	27	0.907407	aa_137Y	0.2297
HLA-C	28	0.0357143	27	0.0925926	aa_137H	0.22971
HLA-C	28	0.732143	27	0.648148	aa_138D	0.41017
HLA-C	28	0.267857	27	0.351852	aa_138N	0.4102
HLA-C	28	0.0178571	27	0.0740741	aa_140L	0.11199
HLA-C	28	0.642857	27	0.462963	aa_140S	0.0894
HLA-C	28	0.285714	27	0.37037	aa_140F	0.4422
HLA-C	28	0.0535714	27	0.0925926	aa_140Y	0.51674
HLA-C	28	0.875	27	0.814815	aa_162T	0.4044
HLA-C	28	0.125	27	0.185185	aa_162K	0.4044
HLA-C	28	0	27	0.0185185	aa_167S	0.33368
HLA-C	28	1	27	0.981481	aa_167T	0.3337
HLA-C	28	0.714286	27	0.722222	aa_171W	0.6464
HLA-C	28	0.285714	27	0.277778	aa_171L	0.6464
HLA-C	28	0.642857	27	0.685185	aa_176E	0.5684
HLA-C	28	0.339286	27	0.314815	aa_176A	0.5588
HLA-C	28	0.0178571	27	0	aa_176T	0.85753
HLA-C	28	0.285714	27	0.12963	aa_180W	0.08788
HLA-C	28	0.0535714	27	0.0555556	aa_180Q	0.89639
HLA-C	28	0.392857	27	0.444444	aa_180L	0.6657
HLA-C	28	0.267857	27	0.37037	aa_180R	0.2863
HLA-C	28	0.0535714	27	0.0740741	aa_187L	0.7207
HLA-C	28	0.125	27	0.0740741	aa_187E	0.52186
HLA-C	28	0.821429	27	0.851852	aa_187T	0.741
HLA-C	28	0	27	0.0185185	aa_194G	0.33368
HLA-C	28	1	27	0.981481	aa_194R	0.3337
HLA-C	28	0.0535714	27	0.0740741	aa_197K	0.7207
HLA-C	28	0.946429	27	0.925926	aa_197E	0.7207
HLA-C	28	0.982143	27	1	aa_199G	0.858
HLA-C	28	0.0178571	27	0	aa_199R	0.85753
HLA-C	28	0.857143	27	0.814815	aa_201E	0.39539
HLA-C	28	0.142857	27	0.185185	aa_201K	0.3954
HLA-C	28	0.0178571	27	0	aa_207D	0.4282
HLA-C	28	0.982143	27	1	aa_207E	0.428
HLA-C	28	0.303571	27	0.259259	aa_208P	0.37861
HLA-C	28	0.696429	27	0.722222	aa_208H	0.5134
HLA-C	28	0	27	0.0185185	aa_208R	0.33368
HLA-C	28	0.0535714	27	0.0555556	aa_217L	0.89639
HLA-C	28	0.946429	27	0.944444	aa_217P	0.896
HLA-C	28	0.285714	27	0.259259	aa_218L	0.4912
HLA-C	28	0.696429	27	0.740741	aa_218V	0.3786
HLA-C	28	0.0178571	27	0	aa_218I	0.4282
HLA-C	28	0.875	27	0.944444	aa_235A	0.329
HLA-C	28	0.125	27	0.0555556	aa_235T	0.32879
HLA-C	28	0.803571	27	0.740741	aa_243R	0.4771
HLA-C	28	0.196429	27	0.259259	aa_243W	0.47711
HLA-C	28	1	27	0.981481	aa_272V	0.296
HLA-C	28	0	27	0.0185185	aa_272M	0.29595
HLA-C	28	0.285714	27	0.277778	aa_277Q	0.6464
HLA-C	28	0.714286	27	0.722222	aa_277E	0.6464
HLA-C	28	0.714286	27	0.740741	aa_285V	0.4912
HLA-C	28	0.285714	27	0.259259	aa_285M	0.4912
HLA-C	28	0.285714	27	0.259259	aa_291Q	0.4912
HLA-C	28	0.714286	27	0.740741	aa_291P	0.4912
HLA-C	28	0.285714	27	0.259259	aa_297S	0.4912
HLA-C	28	0.714286	27	0.740741	aa_297R	0.4912
HLA-C	28	0.732143	27	0.666667	aa_299E	0.50916
HLA-C	28	0.142857	27	0.185185	aa_299G	0.3954
HLA-C	28	0.125	27	0.148148	aa_299K	0.90549
HLA-C	28	1	27	0.981481	aa_308I	0.3337
HLA-C	28	0	27	0.0185185	aa_308N	0.33368
HLA-C	28	0.285714	27	0.259259	aa_309M	0.4912
HLA-C	28	0	27	0.0185185	aa_309L	0.33368
HLA-C	28	0.714286	27	0.722222	aa_309V	0.6464
HLA-C	28	0	27	0.0185185	aa_313S	0.33368
HLA-C	28	1	27	0.981481	aa_313A	0.3337
HLA-C	28	0	27	0.0185185	aa_315P	0.33368
HLA-C	28	1	27	0.981481	aa_315del	0.3337
HLA-C	28	0	27	0.0185185	aa_316A	0.33368
HLA-C	28	1	27	0.981481	aa_316del	0.3337
HLA-C	28	1	27	0.981481	aa_317del	0.3337
HLA-C	28	0	27	0.0185185	aa_317V	0.33368
HLA-C	28	0	27	0.0185185	aa_318L	0.33368
HLA-C	28	1	27	0.981481	aa_318del	0.3337
HLA-C	28	0	27	0.0185185	aa_319A	0.33368
HLA-C	28	1	27	0.981481	aa_319del	0.3337
HLA-C	28	0	27	0.0185185	aa_320V	0.33368
HLA-C	28	1	27	0.981481	aa_320del	0.3337
HLA-C	28	0.285714	27	0.259259	aa_325V	0.4912
HLA-C	28	0.714286	27	0.740741	aa_325A	0.4912
HLA-C	28	0.125	27	0.12963	aa_333M	0.80846
HLA-C	28	0.875	27	0.87037	aa_333V	0.8085
HLA-C	28	0.660714	27	0.648148	aa_334V	0.7795
HLA-C	28	0.339286	27	0.351852	aa_334M	0.7795
HLA-C	28	0.714286	27	0.740741	aa_335A	0.4912
HLA-C	28	0.285714	27	0.259259	aa_335T	0.4912
HLA-C	28	0.285714	27	0.277778	aa_336A	0.6464
HLA-C	28	0.714286	27	0.722222	aa_336V	0.6464
HLA-C	28	0.714286	27	0.740741	aa_337V	0.4912
HLA-C	28	0.285714	27	0.259259	aa_337M	0.4912
HLA-C	28	0	27	0.0185185	aa_338I	0.33368
HLA-C	28	1	27	0.981481	aa_338M	0.3337
HLA-C	28	1	27	0.981481	aa_339C	0.3337
HLA-C	28	0	27	0.0185185	aa_339H	0.33368
HLA-C	28	0.0178571	27	0.0185185	aa_354V	0.99593
HLA-C	28	0.982143	27	0.981481	aa_354A	0.996
HLA-C	28	0.285714	27	0.259259	aa_356C	0.4912
HLA-C	28	0.714286	27	0.740741	aa_356S	0.4912
HLA-C	28	0.285714	27	0.259259	aa_369T	0.4912
HLA-C	28	0.714286	27	0.740741	aa_369A	0.4912
HLA-DMA	28	0.107143	28	0.125	aa_166I	0.8505
HLA-DMA	28	0.892857	28	0.875	aa_166V	0.8505
HLA-DMA	28	0.964286	28	0.946429	aa_181G	0.4241
HLA-DMA	28	0.0357143	28	0.0535714	aa_181A	0.42412
HLA-DMA	28	0.0357143	28	0.0535714	aa_210H	0.42412
HLA-DMA	28	0.0178571	28	0	aa_210C	0.30775
HLA-DMA	28	0.946429	28	0.946429	aa_210R	0.778
HLA-DMB	28	0.0357143	28	0.0535714	aa_28A	0.42412
HLA-DMB	28	0.964286	28	0.946429	aa_28T	0.4241
HLA-DMB	28	0.0357143	28	0.0535714	aa_49V	0.42412
HLA-DMB	28	0.964286	28	0.946429	aa_49D	0.4241
HLA-DMB	28	0.964286	28	0.946429	aa_71S	0.4241
HLA-DMB	28	0.0357143	28	0.0535714	aa_71N	0.42412
HLA-DMB	28	0.0178571	28	0.0357143	aa_162E	0.674
HLA-DMB	28	0.0178571	28	0	aa_162V	0.3896
HLA-DMB	28	0.964286	28	0.964286	aa_162A	0.941
HLA-DMB	28	0.75	28	0.821429	aa_197I	0.6341
HLA-DMB	28	0.25	28	0.178571	aa_197T	0.634
HLA-DOA	28	0.0178571	28	0	aa_105C	0.21385
HLA-DOA	28	0.982143	28	1	aa_105R	0.214
HLA-DOA	28	0.982143	28	1	aa_139F	0.338
HLA-DOA	28	0.0178571	28	0	aa_139L	0.33785
HLA-DOB	28	1	28	0.928571	aa_18R	0.014184
HLA-DOB	28	0	28	0.0714286	aa_18Q	0.01418
HLA-DOB	28	0.928571	28	0.982143	aa_210V	0.208
HLA-DOB	28	0.0714286	28	0.0178571	aa_210I	0.208
HLA-DOB	28	0.928571	28	0.946429	aa_234L	0.907
HLA-DOB	28	0.0714286	28	0.0535714	aa_234F	0.9071
HLA-DOB	28	0.982143	28	0.982143	aa_244V	0.932
HLA-DOB	28	0.0178571	28	0.0178571	aa_244I	0.9319
HLA-DPA1	28	0.0535714	28	0.0535714	aa_42M	0.9801
HLA-DPA1	28	0.946429	28	0.946429	aa_42A	0.98
HLA-DPA1	28	0.75	28	0.732143	aa_62M	0.9639
HLA-DPA1	28	0.25	28	0.267857	aa_62Q	0.9639
HLA-DPA1	28	0.75	28	0.732143	aa_81Q	0.9639
HLA-DPA1	28	0.25	28	0.267857	aa_81R	0.9639
HLA-DPA1	28	0.25	28	0.267857	aa_114A	0.9639
HLA-DPA1	28	0.75	28	0.732143	aa_114T	0.9639
HLA-DPA1	28	0.0178571	28	0	aa_122M	0.21385
HLA-DPA1	28	0.982143	28	1	aa_122V	0.214
HLA-DPA1	28	0.75	28	0.732143	aa_142K	0.9639
HLA-DPA1	28	0.25	28	0.267857	aa_142R	0.9639
HLA-DPA1	28	0.75	28	0.732143	aa_158L	0.9639
HLA-DPA1	28	0.25	28	0.267857	aa_158P	0.9639
HLA-DPA1	28	0.75	28	0.732143	aa_191F	0.9639
HLA-DPA1	28	0.25	28	0.267857	aa_191V	0.9639
HLA-DPA1	28	0.25	28	0.267857	aa_259P	0.9639
HLA-DPA1	28	0.75	28	0.732143	aa_259T	0.9639
HLA-DPB1	28	0.714286	28	0.696429	aa_37L	0.7805
HLA-DPB1	28	0.285714	28	0.303571	aa_37V	0.78
HLA-DPB1	28	0.0892857	28	0.107143	aa_38H	0.9854
HLA-DPB1	28	0.196429	28	0.196429	aa_38Y	0.7424
HLA-DPB1	28	0.714286	28	0.696429	aa_38F	0.7805
HLA-DPB1	28	0.767857	28	0.821429	aa_40G	0.275
HLA-DPB1	28	0.232143	28	0.178571	aa_40L	0.27485
HLA-DPB1	28	0.0357143	28	0	aa_62Q	0.19049
HLA-DPB1	28	0.964286	28	1	aa_62E	0.19
HLA-DPB1	28	0.0535714	28	0	aa_64L	0.09593
HLA-DPB1	28	0.0892857	28	0.142857	aa_64Y	0.5365
HLA-DPB1	28	0.857143	28	0.857143	aa_64F	0.9967
HLA-DPB1	28	0.375	28	0.464286	aa_65A	0.2813
HLA-DPB1	28	0.625	28	0.535714	aa_65V	0.28132
HLA-DPB1	28	0.410714	28	0.5	aa_84A	0.2512
HLA-DPB1	28	0.517857	28	0.5	aa_84D	0.6359
HLA-DPB1	28	0.0714286	28	0	aa_84E	0.03083
HLA-DPB1	28	0.482143	28	0.5	aa_85A	0.6359
HLA-DPB1	28	0.517857	28	0.5	aa_85E	0.6359
HLA-DPB1	28	0.160714	28	0.125	aa_86D	0.4066
HLA-DPB1	28	0.839286	28	0.875	aa_86E	0.407
HLA-DPB1	28	0.178571	28	0.0892857	aa_94L	0.09881
HLA-DPB1	28	0.821429	28	0.910714	aa_94I	0.0988
HLA-DPB1	28	0.0357143	28	0	aa_98R	0.19049
HLA-DPB1	28	0.696429	28	0.678571	aa_98K	0.9739
HLA-DPB1	28	0.267857	28	0.321429	aa_98E	0.6411
HLA-DPB1	28	0.196429	28	0.25	aa_105V	0.9406
HLA-DPB1	28	0.767857	28	0.732143	aa_105M	0.8757
HLA-DPB1	28	0.0357143	28	0.0178571	aa_105I	0.5403
HLA-DPB1	28	0.375	28	0.303571	aa_113D	0.30307
HLA-DPB1	28	0.607143	28	0.696429	aa_113G	0.2262
HLA-DPB1	28	0.0178571	28	0	aa_113V	0.33785
HLA-DPB1	28	0.375	28	0.303571	aa_114E	0.30307
HLA-DPB1	28	0.625	28	0.696429	aa_114G	0.3031
HLA-DPB1	28	0.375	28	0.303571	aa_115A	0.30307
HLA-DPB1	28	0.625	28	0.696429	aa_115P	0.3031
HLA-DPB1	28	0.625	28	0.696429	aa_116M	0.3031
HLA-DPB1	28	0.375	28	0.303571	aa_116V	0.30307
HLA-DPB1	28	0.375	28	0.267857	aa_125K	0.15893
HLA-DPB1	28	0.625	28	0.732143	aa_125R	0.1589
HLA-DPB1	28	0.375	28	0.285714	aa_199I	0.20461
HLA-DPB1	28	0.625	28	0.714286	aa_199T	0.2046
HLA-DPB1	28	0.839286	28	0.910714	aa_207L	0.374
HLA-DPB1	28	0.160714	28	0.0892857	aa_207M	0.37388
HLA-DPB1	28	0.964286	28	0.839286	aa_223R	0.10886
HLA-DPB1	28	0.0357143	28	0.142857	aa_223Q	0.169
HLA-DPB1	28	0	28	0.0178571	aa_223W	0.369
HLA-DPB1	28	0.910714	28	0.982143	aa_234V	0.0745
HLA-DPB1	28	0.0892857	28	0.0178571	aa_234M	0.0745
HLA-DPB1	28	0.0178571	28	0	aa_244T	0.33785
HLA-DPB1	28	0.982143	28	1	aa_244I	0.338
HLA-DRA	28	0	28	0.0178571	aa_16L	0.4928
HLA-DRA	28	1	28	0.982143	aa_16V	0.493
HLA-DRA	28	0.642857	28	0.607143	aa_242V	0.8541
HLA-DRA	28	0.357143	28	0.392857	aa_242L	0.8541
HLA-DRB1	28	0.482143	28	0.660714	aa_5R	0.1492
HLA-DRB1	28	0.517857	28	0.339286	aa_5K	0.14924
HLA-DRB1	28	0.0892857	28	0.142857	aa_6F	0.194
HLA-DRB1	28	0.910714	28	0.857143	aa_6L	0.19399
HLA-DRB1	28	0.232143	28	0.125	aa_13T	0.25771
HLA-DRB1	28	0.767857	28	0.875	aa_13A	0.258
HLA-DRB1	28	0.517857	28	0.339286	aa_14A	0.14924
HLA-DRB1	28	0.482143	28	0.660714	aa_14V	0.1492
HLA-DRB1	28	0.910714	28	0.910714	aa_29A	0.9515
HLA-DRB1	28	0.0892857	28	0.0892857	aa_29S	0.9515
HLA-DRB1	28	0.803571	28	0.928571	aa_33R	0.0217
HLA-DRB1	28	0.196429	28	0.0714286	aa_33Q	0.02168
HLA-DRB1	28	0.553571	28	0.803571	aa_39E	0.00851
HLA-DRB1	28	0.410714	28	0.196429	aa_39W	0.02665
HLA-DRB1	28	0.0178571	28	0	aa_39K	0.10254
HLA-DRB1	28	0.0178571	28	0	aa_39del	0.29154
HLA-DRB1	28	0.517857	28	0.339286	aa_40Q	0.14924
HLA-DRB1	28	0	28	0.0178571	aa_40E	0.3854
HLA-DRB1	28	0.0178571	28	0	aa_40del	0.29154
HLA-DRB1	28	0.464286	28	0.642857	aa_40Y	0.1452
HLA-DRB1	28	0.125	28	0.0357143	aa_41L	0.2476
HLA-DRB1	28	0.0892857	28	0.160714	aa_41V	0.1243
HLA-DRB1	28	0.464286	28	0.642857	aa_41S	0.1452
HLA-DRB1	28	0.178571	28	0.0714286	aa_41G	0.06114
HLA-DRB1	28	0.0178571	28	0	aa_41del	0.29154
HLA-DRB1	28	0.0178571	28	0	aa_41D	0.10254
HLA-DRB1	28	0.107143	28	0.0892857	aa_41P	0.7684
HLA-DRB1	28	0.464286	28	0.642857	aa_42T	0.1452
HLA-DRB1	28	0.0178571	28	0	aa_42del	0.29154
HLA-DRB1	28	0.517857	28	0.357143	aa_42K	0.19859
HLA-DRB1	28	0.410714	28	0.571429	aa_43S	0.1926
HLA-DRB1	28	0.0535714	28	0.0714286	aa_43G	0.7329
HLA-DRB1	28	0.0892857	28	0.142857	aa_43H	0.194
HLA-DRB1	28	0.0178571	28	0	aa_43del	0.29154
HLA-DRB1	28	0.142857	28	0.0535714	aa_43F	0.2141
HLA-DRB1	28	0.107143	28	0.0892857	aa_43R	0.7684
HLA-DRB1	28	0.178571	28	0.0714286	aa_43Y	0.06114
HLA-DRB1	28	0.0178571	28	0	aa_44del	0.29154
HLA-DRB1	28	0.803571	28	0.928571	aa_44E	0.0308
HLA-DRB1	28	0.178571	28	0.0714286	aa_44K	0.06114
HLA-DRB1	28	0.982143	28	1	aa_45C	0.292
HLA-DRB1	28	0.0178571	28	0	aa_45del	0.29154
HLA-DRB1	28	0.0535714	28	0.0714286	aa_46Y	0.7329
HLA-DRB1	28	0.928571	28	0.928571	aa_46H	0.939
HLA-DRB1	28	0.0178571	28	0	aa_46del	0.29154
HLA-DRB1	28	0.982143	28	1	aa_47F	0.292
HLA-DRB1	28	0.0178571	28	0	aa_47del	0.29154
HLA-DRB1	28	0.0178571	28	0	aa_48del	0.29154
HLA-DRB1	28	0.982143	28	1	aa_48F	0.292
HLA-DRB1	28	0.0178571	28	0	aa_49del	0.29154
HLA-DRB1	28	0.982143	28	1	aa_49N	0.292
HLA-DRB1	28	0.0178571	28	0	aa_50del	0.29154
HLA-DRB1	28	0.982143	28	1	aa_50G	0.292
HLA-DRB1	28	0.0178571	28	0	aa_51del	0.29154
HLA-DRB1	28	0.982143	28	1	aa_51T	0.292
HLA-DRB1	28	0.982143	28	1	aa_52E	0.292
HLA-DRB1	28	0.0178571	28	0	aa_52G	0.29154
HLA-DRB1	28	0.982143	28	1	aa_54V	0.292
HLA-DRB1	28	0.0178571	28	0	aa_54L	0.29154
HLA-DRB1	28	0.178571	28	0.0714286	aa_55Q	0.06114
HLA-DRB1	28	0.821429	28	0.928571	aa_55R	0.0611
HLA-DRB1	28	0.142857	28	0.0714286	aa_56L	0.4251
HLA-DRB1	28	0.107143	28	0.142857	aa_56Y	0.9286
HLA-DRB1	28	0.75	28	0.785714	aa_56F	0.604
HLA-DRB1	28	0.0178571	28	0	aa_57del	0.29154
HLA-DRB1	28	0.982143	28	1	aa_57L	0.292
HLA-DRB1	28	0.0178571	28	0	aa_58H	0.10254
HLA-DRB1	28	0.0178571	28	0	aa_58del	0.29154
HLA-DRB1	28	0.607143	28	0.839286	aa_58D	0.0107
HLA-DRB1	28	0.357143	28	0.160714	aa_58E	0.043
HLA-DRB1	28	0.982143	28	1	aa_59R	0.292
HLA-DRB1	28	0.0178571	28	0	aa_59del	0.29154
HLA-DRB1	28	0.0178571	28	0	aa_60G	0.10254
HLA-DRB1	28	0.178571	28	0.0714286	aa_60L	0.06114
HLA-DRB1	28	0.660714	28	0.857143	aa_60Y	0.0274
HLA-DRB1	28	0	28	0.0178571	aa_60R	0.3854
HLA-DRB1	28	0.125	28	0.0357143	aa_60C	0.2476
HLA-DRB1	28	0	28	0.0178571	aa_60H	0.3687
HLA-DRB1	28	0.0178571	28	0	aa_60del	0.29154
HLA-DRB1	28	0	28	0.0178571	aa_61V	0.3854
HLA-DRB1	28	0.0178571	28	0	aa_61del	0.29154
HLA-DRB1	28	0.839286	28	0.946429	aa_61F	0.13
HLA-DRB1	28	0.142857	28	0.0357143	aa_61I	0.1148
HLA-DRB1	28	0.285714	28	0.392857	aa_62H	0.4558
HLA-DRB1	28	0.0178571	28	0	aa_62del	0.29154
HLA-DRB1	28	0.696429	28	0.607143	aa_62Y	0.6059
HLA-DRB1	28	0.892857	28	0.857143	aa_63N	0.3493
HLA-DRB1	28	0.0178571	28	0	aa_63del	0.29154
HLA-DRB1	28	0.0892857	28	0.142857	aa_63H	0.194
HLA-DRB1	28	0.982143	28	1	aa_64Q	0.292
HLA-DRB1	28	0.0178571	28	0	aa_64del	0.29154
HLA-DRB1	28	0.982143	28	1	aa_65E	0.292
HLA-DRB1	28	0.0178571	28	0	aa_65del	0.29154
HLA-DRB1	28	0.0178571	28	0	aa_66del	0.29154
HLA-DRB1	28	0.982143	28	1	aa_66E	0.292
HLA-DRB1	28	0.214286	28	0.107143	aa_67F	0.092
HLA-DRB1	28	0.267857	28	0.428571	aa_67Y	0.0403
HLA-DRB1	28	0.0178571	28	0	aa_67del	0.29154
HLA-DRB1	28	0.232143	28	0.125	aa_67S	0.25771
HLA-DRB1	28	0.267857	28	0.321429	aa_67N	0.9471
HLA-DRB1	28	0	28	0.0178571	aa_67L	0.3687
HLA-DRB1	28	0	28	0.0178571	aa_68A	0.3854
HLA-DRB1	28	0.0178571	28	0	aa_68del	0.29154
HLA-DRB1	28	0.982143	28	0.964286	aa_68V	0.672
HLA-DRB1	28	0	28	0.0178571	aa_68L	0.3687
HLA-DRB1	28	0.0178571	28	0	aa_69del	0.29154
HLA-DRB1	28	0.982143	28	1	aa_69R	0.292
HLA-DRB1	28	0	28	0.0178571	aa_70Y	0.3854
HLA-DRB1	28	0.982143	28	0.982143	aa_70F	0.898
HLA-DRB1	28	0.0178571	28	0	aa_70del	0.29154
HLA-DRB1	28	0.0178571	28	0	aa_71del	0.29154
HLA-DRB1	28	0.982143	28	1	aa_71D	0.292
HLA-DRB1	28	0.0178571	28	0	aa_72del	0.29154
HLA-DRB1	28	0.982143	28	1	aa_72S	0.292
HLA-DRB1	28	0.0178571	28	0	aa_73del	0.29154
HLA-DRB1	28	0.982143	28	1	aa_73D	0.292
HLA-DRB1	28	0.982143	28	1	aa_74V	0.292
HLA-DRB1	28	0.0178571	28	0	aa_74del	0.29154
HLA-DRB1	28	0.0178571	28	0	aa_75del	0.29154
HLA-DRB1	28	0.982143	28	1	aa_75G	0.292
HLA-DRB1	28	0.982143	28	1	aa_76E	0.292
HLA-DRB1	28	0.0178571	28	0	aa_76del	0.29154
HLA-DRB1	28	0.0178571	28	0	aa_77del	0.29154
HLA-DRB1	28	0.410714	28	0.571429	aa_77F	0.234
HLA-DRB1	28	0.571429	28	0.428571	aa_77Y	0.3194
HLA-DRB1	28	0.0178571	28	0	aa_78S	0.29154
HLA-DRB1	28	0.982143	28	1	aa_78R	0.292
HLA-DRB1	28	0.0178571	28	0	aa_79V	0.29154
HLA-DRB1	28	0.982143	28	1	aa_79A	0.292
HLA-DRB1	28	0.982143	28	1	aa_80V	0.292
HLA-DRB1	28	0.0178571	28	0	aa_80I	0.29154
HLA-DRB1	28	0.982143	28	1	aa_81T	0.292
HLA-DRB1	28	0.0178571	28	0	aa_81S	0.29154
HLA-DRB1	28	0.0178571	28	0	aa_82S	0.29154
HLA-DRB1	28	0.982143	28	1	aa_82E	0.292
HLA-DRB1	28	0.0178571	28	0	aa_83M	0.29154
HLA-DRB1	28	0.982143	28	1	aa_83L	0.292
HLA-DRB1	28	0.0178571	28	0	aa_86S	0.29154
HLA-DRB1	28	0.982143	28	1	aa_86P	0.292
HLA-DRB1	28	0.696429	28	0.803571	aa_87D	0.121
HLA-DRB1	28	0.0357143	28	0.0357143	aa_87A	0.948
HLA-DRB1	28	0.0178571	28	0	aa_87G	0.29154
HLA-DRB1	28	0.0535714	28	0.0714286	aa_87S	0.6204
HLA-DRB1	28	0.196429	28	0.0892857	aa_87V	0.0483
HLA-DRB1	28	0.857143	28	0.839286	aa_88A	0.8829
HLA-DRB1	28	0.0178571	28	0	aa_88C	0.29154
HLA-DRB1	28	0.125	28	0.160714	aa_88E	0.6998
HLA-DRB1	28	0.0178571	28	0	aa_89G	0.29154
HLA-DRB1	28	0.982143	28	1	aa_89E	0.292
HLA-DRB1	28	0.75	28	0.875	aa_90Y	0.0408
HLA-DRB1	28	0.0357143	28	0.0357143	aa_90H	0.948
HLA-DRB1	28	0.0178571	28	0	aa_90T	0.29154
HLA-DRB1	28	0.196429	28	0.0892857	aa_90S	0.0483
HLA-DRB1	28	0.982143	28	1	aa_92N	0.292
HLA-DRB1	28	0.0178571	28	0	aa_92T	0.29154
HLA-DRB1	28	0.982143	28	1	aa_93S	0.292
HLA-DRB1	28	0.0178571	28	0	aa_93del	0.29154
HLA-DRB1	28	0.982143	28	1	aa_94Q	0.292
HLA-DRB1	28	0.0178571	28	0	aa_94del	0.29154
HLA-DRB1	28	0.0178571	28	0	aa_95del	0.29154
HLA-DRB1	28	0.982143	28	1	aa_95K	0.292
HLA-DRB1	28	0.982143	28	1	aa_96D	0.292
HLA-DRB1	28	0.0178571	28	0	aa_96del	0.29154
HLA-DRB1	28	0.339286	28	0.392857	aa_97L	0.4594
HLA-DRB1	28	0.0178571	28	0	aa_97del	0.29154
HLA-DRB1	28	0.446429	28	0.392857	aa_97I	0.6021
HLA-DRB1	28	0.196429	28	0.214286	aa_97F	0.9648
HLA-DRB1	28	0.0178571	28	0	aa_98del	0.29154
HLA-DRB1	28	0.982143	28	1	aa_98L	0.292
HLA-DRB1	28	0.0178571	28	0	aa_99del	0.29154
HLA-DRB1	28	0.982143	28	1	aa_99E	0.292
HLA-DRB1	28	0.392857	28	0.428571	aa_100Q	0.4859
HLA-DRB1	28	0.0535714	28	0.0535714	aa_100R	0.755
HLA-DRB1	28	0.0178571	28	0	aa_100del	0.29154
HLA-DRB1	28	0.535714	28	0.517857	aa_100D	0.7578
HLA-DRB1	28	0.160714	28	0.160714	aa_101E	0.8534
HLA-DRB1	28	0.107143	28	0.25	aa_101K	0.0462
HLA-DRB1	28	0.0892857	28	0.0892857	aa_101A	0.9515
HLA-DRB1	28	0.625	28	0.5	aa_101R	0.21481
HLA-DRB1	28	0.0178571	28	0	aa_101del	0.29154
HLA-DRB1	28	0.982143	28	1	aa_102R	0.292
HLA-DRB1	28	0.0178571	28	0	aa_102del	0.29154
HLA-DRB1	28	0.285714	28	0.232143	aa_103G	0.32103
HLA-DRB1	28	0.696429	28	0.767857	aa_103A	0.2192
HLA-DRB1	28	0.0178571	28	0	aa_103del	0.29154
HLA-DRB1	28	0.196429	28	0.0714286	aa_104Q	0.04979
HLA-DRB1	28	0.0714286	28	0.107143	aa_104E	0.8064
HLA-DRB1	28	0.0535714	28	0.0535714	aa_104L	0.982
HLA-DRB1	28	0.571429	28	0.607143	aa_104A	0.3474
HLA-DRB1	28	0.0892857	28	0.160714	aa_104R	0.4868
HLA-DRB1	28	0.0178571	28	0	aa_104del	0.29154
HLA-DRB1	28	0.0178571	28	0	aa_105del	0.29154
HLA-DRB1	28	0.982143	28	1	aa_105V	0.292
HLA-DRB1	28	0.0892857	28	0.160714	aa_107N	0.4868
HLA-DRB1	28	0.910714	28	0.839286	aa_107T	0.4868
HLA-DRB1	28	0.214286	28	0.0714286	aa_108V	0.01915
HLA-DRB1	28	0.0178571	28	0	aa_108del	0.29154
HLA-DRB1	28	0.767857	28	0.928571	aa_108Y	0.00907
HLA-DRB1	28	0.0178571	28	0	aa_109del	0.29154
HLA-DRB1	28	0.982143	28	1	aa_109C	0.292
HLA-DRB1	28	0.0178571	28	0	aa_110del	0.29154
HLA-DRB1	28	0.982143	28	1	aa_110R	0.292
HLA-DRB1	28	0.982143	28	1	aa_111H	0.292
HLA-DRB1	28	0.0178571	28	0	aa_111del	0.29154
HLA-DRB1	28	0.982143	28	1	aa_112N	0.292
HLA-DRB1	28	0.0178571	28	0	aa_112del	0.29154
HLA-DRB1	28	0.0178571	28	0	aa_113del	0.29154
HLA-DRB1	28	0.982143	28	1	aa_113Y	0.292
HLA-DRB1	28	0.982143	28	1	aa_114G	0.292
HLA-DRB1	28	0.0178571	28	0	aa_114del	0.29154
HLA-DRB1	28	0.928571	28	0.982143	aa_115V	0.17
HLA-DRB1	28	0.0535714	28	0.0178571	aa_115A	0.329
HLA-DRB1	28	0.0178571	28	0	aa_115del	0.29154
HLA-DRB1	28	0.0178571	28	0	aa_116del	0.29154
HLA-DRB1	28	0.535714	28	0.517857	aa_116G	0.7961
HLA-DRB1	28	0.446429	28	0.482143	aa_116V	0.98
HLA-DRB1	28	0.0178571	28	0	aa_117del	0.29154
HLA-DRB1	28	0.982143	28	1	aa_117E	0.292
HLA-DRB1	28	0.0178571	28	0	aa_118del	0.29154
HLA-DRB1	28	0.982143	28	1	aa_118S	0.292
HLA-DRB1	28	0.982143	28	1	aa_119F	0.292
HLA-DRB1	28	0.0178571	28	0	aa_119del	0.29154
HLA-DRB1	28	0.0178571	28	0	aa_120S	0.29154
HLA-DRB1	28	0.982143	28	1	aa_120T	0.292
HLA-DRB1	28	0.0178571	28	0	aa_121I	0.29154
HLA-DRB1	28	0.982143	28	1	aa_121V	0.292
HLA-DRB1	28	0.0178571	28	0	aa_122T	0.29154
HLA-DRB1	28	0.982143	28	1	aa_122Q	0.292
HLA-DRB1	28	0.982143	28	1	aa_125V	0.292
HLA-DRB1	28	0.0178571	28	0	aa_125del	0.29154
HLA-DRB1	28	0.0178571	28	0	aa_126del	0.29154
HLA-DRB1	28	0.660714	28	0.714286	aa_126H	0.9516
HLA-DRB1	28	0.0892857	28	0.142857	aa_126Y	0.194
HLA-DRB1	28	0.107143	28	0.107143	aa_126Q	0.9884
HLA-DRB1	28	0.125	28	0.0357143	aa_126E	0.2476
HLA-DRB1	28	0.0178571	28	0	aa_127del	0.29154
HLA-DRB1	28	0.982143	28	1	aa_127P	0.292
HLA-DRB1	28	0.285714	28	0.214286	aa_128E	0.42974
HLA-DRB1	28	0.696429	28	0.785714	aa_128K	0.3
HLA-DRB1	28	0.0178571	28	0	aa_128del	0.29154
HLA-DRB1	28	0.0178571	28	0	aa_129del	0.29154
HLA-DRB1	28	0.982143	28	1	aa_129V	0.292
HLA-DRB1	28	0.982143	28	1	aa_130T	0.292
HLA-DRB1	28	0.0178571	28	0	aa_130del	0.29154
HLA-DRB1	28	0.0178571	28	0	aa_131del	0.29154
HLA-DRB1	28	0.982143	28	1	aa_131V	0.292
HLA-DRB1	28	0.0178571	28	0	aa_132del	0.29154
HLA-DRB1	28	0.982143	28	1	aa_132Y	0.292
HLA-DRB1	28	0.982143	28	1	aa_133P	0.292
HLA-DRB1	28	0.0178571	28	0	aa_133del	0.29154
HLA-DRB1	28	0.285714	28	0.214286	aa_134A	0.42974
HLA-DRB1	28	0.0178571	28	0	aa_134del	0.29154
HLA-DRB1	28	0.696429	28	0.785714	aa_134S	0.3
HLA-DRB1	28	0.982143	28	1	aa_135K	0.292
HLA-DRB1	28	0.0178571	28	0	aa_135del	0.29154
HLA-DRB1	28	0.982143	28	1	aa_136T	0.292
HLA-DRB1	28	0.0178571	28	0	aa_136del	0.29154
HLA-DRB1	28	0.982143	28	1	aa_137Q	0.292
HLA-DRB1	28	0.0178571	28	0	aa_137del	0.29154
HLA-DRB1	28	0.0178571	28	0	aa_138del	0.29154
HLA-DRB1	28	0.982143	28	1	aa_138P	0.292
HLA-DRB1	28	0.982143	28	1	aa_139L	0.292
HLA-DRB1	28	0.0178571	28	0	aa_139del	0.29154
HLA-DRB1	28	0.0178571	28	0	aa_140del	0.29154
HLA-DRB1	28	0.982143	28	1	aa_140Q	0.292
HLA-DRB1	28	0.0178571	28	0	aa_141del	0.29154
HLA-DRB1	28	0.982143	28	1	aa_141H	0.292
HLA-DRB1	28	0.982143	28	1	aa_142H	0.292
HLA-DRB1	28	0.0178571	28	0	aa_142del	0.29154
HLA-DRB1	28	0.982143	28	1	aa_143N	0.292
HLA-DRB1	28	0.0178571	28	0	aa_143del	0.29154
HLA-DRB1	28	0.982143	28	1	aa_144L	0.292
HLA-DRB1	28	0.0178571	28	0	aa_144del	0.29154
HLA-DRB1	28	0.0178571	28	0	aa_145del	0.29154
HLA-DRB1	28	0.982143	28	1	aa_145L	0.292
HLA-DRB1	28	0.982143	28	1	aa_146V	0.292
HLA-DRB1	28	0.0178571	28	0	aa_146del	0.29154
HLA-DRB1	28	0.0178571	28	0	aa_147del	0.29154
HLA-DRB1	28	0.982143	28	1	aa_147C	0.292
HLA-DRB1	28	0.982143	28	1	aa_148S	0.292
HLA-DRB1	28	0.0178571	28	0	aa_148del	0.29154
HLA-DRB1	28	0.982143	28	1	aa_149V	0.292
HLA-DRB1	28	0.0178571	28	0	aa_149del	0.29154
HLA-DRB1	28	0.0178571	28	0	aa_150del	0.29154
HLA-DRB1	28	0.0892857	28	0.160714	aa_150N	0.1243
HLA-DRB1	28	0.892857	28	0.839286	aa_150S	0.23909
HLA-DRB1	28	0.0178571	28	0	aa_151del	0.29154
HLA-DRB1	28	0.982143	28	1	aa_151G	0.292
HLA-DRB1	28	0.0178571	28	0	aa_152del	0.29154
HLA-DRB1	28	0.982143	28	1	aa_152F	0.292
HLA-DRB1	28	0.982143	28	1	aa_153Y	0.292
HLA-DRB1	28	0.0178571	28	0	aa_153del	0.29154
HLA-DRB1	28	0.982143	28	1	aa_154P	0.292
HLA-DRB1	28	0.0178571	28	0	aa_154del	0.29154
HLA-DRB1	28	0.982143	28	1	aa_155G	0.292
HLA-DRB1	28	0.0178571	28	0	aa_155del	0.29154
HLA-DRB1	28	0.982143	28	1	aa_156S	0.292
HLA-DRB1	28	0.0178571	28	0	aa_156del	0.29154
HLA-DRB1	28	0.982143	28	1	aa_157I	0.292
HLA-DRB1	28	0.0178571	28	0	aa_157del	0.29154
HLA-DRB1	28	0.982143	28	1	aa_158E	0.292
HLA-DRB1	28	0.0178571	28	0	aa_158del	0.29154
HLA-DRB1	28	0.982143	28	1	aa_159V	0.292
HLA-DRB1	28	0.0178571	28	0	aa_159del	0.29154
HLA-DRB1	28	0.982143	28	1	aa_160R	0.292
HLA-DRB1	28	0.0178571	28	0	aa_160del	0.29154
HLA-DRB1	28	0.0178571	28	0	aa_161del	0.29154
HLA-DRB1	28	0.982143	28	1	aa_161W	0.292
HLA-DRB1	28	0.982143	28	1	aa_162F	0.292
HLA-DRB1	28	0.0178571	28	0	aa_162del	0.29154
HLA-DRB1	28	0.875	28	0.910714	aa_163R	0.557
HLA-DRB1	28	0.0178571	28	0	aa_163del	0.29154
HLA-DRB1	28	0.107143	28	0.0892857	aa_163L	0.7684
HLA-DRB1	28	0.0178571	28	0	aa_164del	0.29154
HLA-DRB1	28	0.982143	28	1	aa_164N	0.292
HLA-DRB1	28	0.0178571	28	0	aa_165del	0.29154
HLA-DRB1	28	0.982143	28	1	aa_165G	0.292
HLA-DRB1	28	0.982143	28	1	aa_166Q	0.292
HLA-DRB1	28	0.0178571	28	0	aa_166del	0.29154
HLA-DRB1	28	0.982143	28	1	aa_167E	0.292
HLA-DRB1	28	0.0178571	28	0	aa_167del	0.29154
HLA-DRB1	28	0.982143	28	1	aa_168E	0.292
HLA-DRB1	28	0.0178571	28	0	aa_168del	0.29154
HLA-DRB1	28	0.982143	28	1	aa_169K	0.292
HLA-DRB1	28	0.0178571	28	0	aa_169del	0.29154
HLA-DRB1	28	0.428571	28	0.196429	aa_170A	0.01251
HLA-DRB1	28	0.0178571	28	0	aa_170del	0.29154
HLA-DRB1	28	0.553571	28	0.803571	aa_170T	0.00851
HLA-DRB1	28	0.982143	28	1	aa_171G	0.292
HLA-DRB1	28	0.0178571	28	0	aa_171del	0.29154
HLA-DRB1	28	0.107143	28	0.0892857	aa_172M	0.7684
HLA-DRB1	28	0.875	28	0.910714	aa_172V	0.557
HLA-DRB1	28	0.0178571	28	0	aa_172del	0.29154
HLA-DRB1	28	0.982143	28	1	aa_173V	0.292
HLA-DRB1	28	0.0178571	28	0	aa_173del	0.29154
HLA-DRB1	28	0.0178571	28	0	aa_174del	0.29154
HLA-DRB1	28	0.982143	28	1	aa_174S	0.292
HLA-DRB1	28	0.982143	28	1	aa_175T	0.292
HLA-DRB1	28	0.0178571	28	0	aa_175del	0.29154
HLA-DRB1	28	0.0178571	28	0	aa_176del	0.29154
HLA-DRB1	28	0.982143	28	1	aa_176G	0.292
HLA-DRB1	28	0.982143	28	1	aa_177L	0.292
HLA-DRB1	28	0.0178571	28	0	aa_177del	0.29154
HLA-DRB1	28	0.0178571	28	0	aa_178del	0.29154
HLA-DRB1	28	0.982143	28	1	aa_178I	0.292
HLA-DRB1	28	0.464286	28	0.642857	aa_179H	0.1452
HLA-DRB1	28	0.0178571	28	0	aa_179del	0.29154
HLA-DRB1	28	0.517857	28	0.357143	aa_179Q	0.19859
HLA-DRB1	28	0.0178571	28	0	aa_180del	0.29154
HLA-DRB1	28	0.982143	28	1	aa_180N	0.292
HLA-DRB1	28	0.982143	28	1	aa_181G	0.292
HLA-DRB1	28	0.0178571	28	0	aa_181del	0.29154
HLA-DRB1	28	0.982143	28	1	aa_182D	0.292
HLA-DRB1	28	0.0178571	28	0	aa_182del	0.29154
HLA-DRB1	28	0.0178571	28	0	aa_183del	0.29154
HLA-DRB1	28	0.982143	28	1	aa_183W	0.292
HLA-DRB1	28	0.982143	28	1	aa_184T	0.292
HLA-DRB1	28	0.0178571	28	0	aa_184del	0.29154
HLA-DRB1	28	0.982143	28	1	aa_185F	0.292
HLA-DRB1	28	0.0178571	28	0	aa_185del	0.29154
HLA-DRB1	28	0.0178571	28	0	aa_186del	0.29154
HLA-DRB1	28	0.982143	28	1	aa_186Q	0.292
HLA-DRB1	28	0.982143	28	1	aa_187T	0.292
HLA-DRB1	28	0.0178571	28	0	aa_187del	0.29154
HLA-DRB1	28	0.982143	28	1	aa_188L	0.292
HLA-DRB1	28	0.0178571	28	0	aa_188del	0.29154
HLA-DRB1	28	0.982143	28	1	aa_189V	0.292
HLA-DRB1	28	0.0178571	28	0	aa_189del	0.29154
HLA-DRB1	28	0.0178571	28	0	aa_190del	0.29154
HLA-DRB1	28	0.982143	28	1	aa_190M	0.292
HLA-DRB1	28	0.982143	28	1	aa_191L	0.292
HLA-DRB1	28	0.0178571	28	0	aa_191del	0.29154
HLA-DRB1	28	0.0178571	28	0	aa_192del	0.29154
HLA-DRB1	28	0.982143	28	1	aa_192E	0.292
HLA-DRB1	28	0.982143	28	1	aa_193T	0.292
HLA-DRB1	28	0.0178571	28	0	aa_193del	0.29154
HLA-DRB1	28	0.982143	28	1	aa_194V	0.292
HLA-DRB1	28	0.0178571	28	0	aa_194del	0.29154
HLA-DRB1	28	0.982143	28	1	aa_195P	0.292
HLA-DRB1	28	0.0178571	28	0	aa_195del	0.29154
HLA-DRB1	28	0.982143	28	0.982143	aa_196R	0.898
HLA-DRB1	28	0.0178571	28	0	aa_196del	0.29154
HLA-DRB1	28	0	28	0.0178571	aa_196Q	0.3854
HLA-DRB1	28	0.0178571	28	0	aa_197del	0.29154
HLA-DRB1	28	0.982143	28	1	aa_197S	0.292
HLA-DRB1	28	0.982143	28	1	aa_198G	0.292
HLA-DRB1	28	0.0178571	28	0	aa_198del	0.29154
HLA-DRB1	28	0.982143	28	1	aa_199E	0.292
HLA-DRB1	28	0.0178571	28	0	aa_199del	0.29154
HLA-DRB1	28	0.0178571	28	0	aa_200del	0.29154
HLA-DRB1	28	0.982143	28	1	aa_200V	0.292
HLA-DRB1	28	0.982143	28	1	aa_201Y	0.292
HLA-DRB1	28	0.0178571	28	0	aa_201R	0.29154
HLA-DRB1	28	0.982143	28	1	aa_204Q	0.292
HLA-DRB1	28	0.0178571	28	0	aa_204A	0.29154
HLA-DRB1	28	0.982143	28	1	aa_205V	0.292
HLA-DRB1	28	0.0178571	28	0	aa_205S	0.29154
HLA-DRB1	28	0.0178571	28	0	aa_206del	0.29154
HLA-DRB1	28	0.982143	28	1	aa_206E	0.292
HLA-DRB1	28	0.0178571	28	0	aa_207del	0.29154
HLA-DRB1	28	0.982143	28	1	aa_207H	0.292
HLA-DRB1	28	0.982143	28	1	aa_208P	0.292
HLA-DRB1	28	0.0178571	28	0	aa_208del	0.29154
HLA-DRB1	28	0.0178571	28	0	aa_209del	0.29154
HLA-DRB1	28	0.982143	28	1	aa_209S	0.292
HLA-DRB1	28	0.892857	28	0.857143	aa_210V	0.3493
HLA-DRB1	28	0.0892857	28	0.142857	aa_210L	0.194
HLA-DRB1	28	0.0178571	28	0	aa_210del	0.29154
HLA-DRB1	28	0.196429	28	0.0892857	aa_211M	0.04722
HLA-DRB1	28	0.785714	28	0.910714	aa_211T	0.0235
HLA-DRB1	28	0.0178571	28	0	aa_211del	0.29154
HLA-DRB1	28	0.0178571	28	0	aa_212del	0.29154
HLA-DRB1	28	0.982143	28	1	aa_212S	0.292
HLA-DRB1	28	0.0178571	28	0	aa_213del	0.29154
HLA-DRB1	28	0.982143	28	1	aa_213P	0.292
HLA-DRB1	28	0.0178571	28	0	aa_214del	0.29154
HLA-DRB1	28	0.982143	28	1	aa_214L	0.292
HLA-DRB1	28	0.0178571	28	0	aa_216A	0.29154
HLA-DRB1	28	0.982143	28	1	aa_216V	0.292
HLA-DRB1	28	0.982143	28	1	aa_217E	0.292
HLA-DRB1	28	0.0178571	28	0	aa_217T	0.29154
HLA-DRB1	28	0.928571	28	0.964286	aa_219R	0.368
HLA-DRB1	28	0.0178571	28	0	aa_219del	0.29154
HLA-DRB1	28	0.0535714	28	0.0357143	aa_219S	0.622
HLA-DRB1	28	0.982143	28	1	aa_220A	0.292
HLA-DRB1	28	0.0178571	28	0	aa_220del	0.29154
HLA-DRB1	28	0.982143	28	1	aa_221R	0.292
HLA-DRB1	28	0.0178571	28	0	aa_221del	0.29154
HLA-DRB1	28	0.982143	28	1	aa_222S	0.292
HLA-DRB1	28	0.0178571	28	0	aa_222del	0.29154
HLA-DRB1	28	0.0178571	28	0	aa_223del	0.29154
HLA-DRB1	28	0.982143	28	1	aa_223E	0.292
HLA-DRB1	28	0.982143	28	1	aa_224S	0.292
HLA-DRB1	28	0.0178571	28	0	aa_224del	0.29154
HLA-DRB1	28	0.0178571	28	0	aa_225del	0.29154
HLA-DRB1	28	0.982143	28	1	aa_225A	0.292
HLA-DRB1	28	0.0178571	28	0	aa_226del	0.29154
HLA-DRB1	28	0.982143	28	1	aa_226Q	0.292
HLA-DRB1	28	0.0178571	28	0	aa_227del	0.29154
HLA-DRB1	28	0.982143	28	1	aa_227S	0.292
HLA-DRB1	28	0.0178571	28	0	aa_228del	0.29154
HLA-DRB1	28	0.982143	28	1	aa_228K	0.292
HLA-DRB1	28	0.982143	28	1	aa_229M	0.292
HLA-DRB1	28	0.0178571	28	0	aa_229del	0.29154
HLA-DRB1	28	0.0178571	28	0	aa_230del	0.29154
HLA-DRB1	28	0.982143	28	1	aa_230L	0.292
HLA-DRB1	28	0.982143	28	1	aa_231S	0.292
HLA-DRB1	28	0.0178571	28	0	aa_231del	0.29154
HLA-DRB1	28	0.982143	28	1	aa_232G	0.292
HLA-DRB1	28	0.0178571	28	0	aa_232del	0.29154
HLA-DRB1	28	0.982143	28	1	aa_233V	0.292
HLA-DRB1	28	0.0178571	28	0	aa_233del	0.29154
HLA-DRB1	28	0.982143	28	1	aa_234G	0.292
HLA-DRB1	28	0.0178571	28	0	aa_234del	0.29154
HLA-DRB1	28	0.0178571	28	0	aa_235del	0.29154
HLA-DRB1	28	0.982143	28	1	aa_235G	0.292
HLA-DRB1	28	0.0178571	28	0	aa_236del	0.29154
HLA-DRB1	28	0.982143	28	1	aa_236F	0.292
HLA-DRB1	28	0.982143	28	1	aa_237V	0.292
HLA-DRB1	28	0.0178571	28	0	aa_237del	0.29154
HLA-DRB1	28	0.0178571	28	0	aa_238del	0.29154
HLA-DRB1	28	0.982143	28	1	aa_238L	0.292
HLA-DRB1	28	0.982143	28	1	aa_239G	0.292
HLA-DRB1	28	0.0178571	28	0	aa_239del	0.29154
HLA-DRB1	28	0.982143	28	1	aa_240L	0.292
HLA-DRB1	28	0.0178571	28	0	aa_240del	0.29154
HLA-DRB1	28	0.0178571	28	0	aa_241del	0.29154
HLA-DRB1	28	0.982143	28	1	aa_241L	0.292
HLA-DRB1	28	0.982143	28	1	aa_242F	0.292
HLA-DRB1	28	0.0178571	28	0	aa_242del	0.29154
HLA-DRB1	28	0.0178571	28	0	aa_243del	0.29154
HLA-DRB1	28	0.982143	28	1	aa_243L	0.292
HLA-DRB1	28	0.982143	28	1	aa_244G	0.292
HLA-DRB1	28	0.0178571	28	0	aa_244del	0.29154
HLA-DRB1	28	0.0178571	28	0	aa_245del	0.29154
HLA-DRB1	28	0.982143	28	1	aa_245A	0.292
HLA-DRB1	28	0.982143	28	1	aa_246G	0.292
HLA-DRB1	28	0.0178571	28	0	aa_246del	0.29154
HLA-DRB1	28	0.0178571	28	0	aa_247del	0.29154
HLA-DRB1	28	0.982143	28	1	aa_247L	0.292
HLA-DRB1	28	0.0178571	28	0	aa_248del	0.29154
HLA-DRB1	28	0.982143	28	1	aa_248F	0.292
HLA-DRB1	28	0.982143	28	1	aa_249I	0.292
HLA-DRB1	28	0.0178571	28	0	aa_249del	0.29154
HLA-DRB1	28	0.982143	28	1	aa_250Y	0.292
HLA-DRB1	28	0.0178571	28	0	aa_250del	0.29154
HLA-DRB1	28	0.0178571	28	0	aa_251del	0.29154
HLA-DRB1	28	0.982143	28	1	aa_251F	0.292
HLA-DRB1	28	0.0178571	28	0	aa_252del	0.29154
HLA-DRB1	28	0.982143	28	1	aa_252R	0.292
HLA-DRB1	28	0.982143	28	1	aa_253N	0.292
HLA-DRB1	28	0.0178571	28	0	aa_253del	0.29154
HLA-DRB1	28	0.0178571	28	0	aa_254del	0.29154
HLA-DRB1	28	0.982143	28	1	aa_254Q	0.292
HLA-DRB1	28	0.0178571	28	0	aa_255del	0.29154
HLA-DRB1	28	0.982143	28	1	aa_255K	0.292
HLA-DRB1	28	0.982143	28	1	aa_257H	0.292
HLA-DRB1	28	0.0178571	28	0	aa_257S	0.29154
HLA-DRB1	28	0.0178571	28	0	aa_260R	0.29154
HLA-DRB1	28	0.982143	28	1	aa_260L	0.292
HLA-DRB1	28	0.982143	28	1	aa_261Q	0.292
HLA-DRB1	28	0.0178571	28	0	aa_261del	0.29154
HLA-DRB1	28	0.0178571	28	0	aa_262del	0.29154
HLA-DRB1	28	0.982143	28	1	aa_262P	0.292
HLA-DRB1	28	0.0178571	28	0	aa_263del	0.29154
HLA-DRB1	28	0.428571	28	0.285714	aa_263T	0.24137
HLA-DRB1	28	0.553571	28	0.714286	aa_263R	0.1852
HLA-DRB1	28	0.0178571	28	0	aa_264del	0.29154
HLA-DRB1	28	0.982143	28	1	aa_264G	0.292
HLA-DRB1	28	0.0178571	28	0	aa_265del	0.29154
HLA-DRB1	28	0.982143	28	1	aa_265F	0.292
HLA-DRB1	28	0.0178571	28	0	aa_266del	0.29154
HLA-DRB1	28	0.982143	28	1	aa_266L	0.292
HLA-DRB1	28	0.982143	28	1	aa_267S	0.292
HLA-DRB1	28	0.0178571	28	0	aa_267del	0.29154
HLA-DRB1	28	0.982143	28	1	aa_268X	0.292
HLA-DRB1	28	0.0178571	28	0	aa_268del	0.29154
HLA-E	28	0.357143	28	0.446429	aa_128G	0.412
HLA-E	28	0.642857	28	0.553571	aa_128R	0.4117
HLA-E	28	0.0178571	28	0	aa_217N	0.21385
HLA-E	28	0.982143	28	1	aa_217D	0.214
HLA-F	28	1	28	0.982143	aa_71P	0.2339
HLA-F	28	0	28	0.0178571	aa_71Q	0.23387
HLA-F	28	0.910714	28	0.857143	aa_272S	0.3441
HLA-F	28	0.0892857	28	0.142857	aa_272P	0.3441
HLA-G	28	0.0714286	28	0.0714286	aa_55S	0.9901
HLA-G	28	0.928571	28	0.928571	aa_55T	0.99
HLA-G	28	0.142857	28	0.0178571	aa_134I	0.0414
HLA-G	28	0.857143	28	0.982143	aa_134L	0.0414
HLA-G	28	0.0178571	28	0	aa_154del	0.4132
HLA-G	28	0.982143	28	1	aa_154L	0.413
HLA-G	28	0.982143	28	1	aa_155R	0.413
HLA-G	28	0.0178571	28	0	aa_155del	0.4132
HLA-G	28	0.982143	28	1	aa_156S	0.413
HLA-G	28	0.0178571	28	0	aa_156del	0.4132
HLA-G	28	0.0178571	28	0	aa_157del	0.4132
HLA-G	28	0.982143	28	1	aa_157W	0.413
HLA-G	28	0.982143	28	1	aa_158T	0.413
HLA-G	28	0.0178571	28	0	aa_158del	0.4132
HLA-G	28	0.982143	28	1	aa_159A	0.413
HLA-G	28	0.0178571	28	0	aa_159C	0.4132
HLA-G	28	0.0178571	28	0	aa_161P	0.4132
HLA-G	28	0.982143	28	1	aa_161D	0.413
HLA-G	28	0.982143	28	1	aa_162T	0.413
HLA-G	28	0.0178571	28	0	aa_162G	0.4132
HLA-G	28	0.0178571	28	0	aa_163P	0.4132
HLA-G	28	0.982143	28	1	aa_163A	0.413
HLA-G	28	0.982143	28	1	aa_164A	0.413
HLA-G	28	0.0178571	28	0	aa_164Q	0.4132
HLA-G	28	0.982143	28	1	aa_165Q	0.413
HLA-G	28	0.0178571	28	0	aa_165R	0.4132
HLA-G	28	0.0178571	28	0	aa_166T	0.4132
HLA-G	28	0.982143	28	1	aa_166I	0.413
HLA-G	28	0.982143	28	1	aa_167S	0.413
HLA-G	28	0.0178571	28	0	aa_167L	0.4132
HLA-G	28	0.0178571	28	0	aa_168R	0.4132
HLA-G	28	0.982143	28	1	aa_168K	0.413
HLA-G	28	0.0178571	28	0	aa_169L	0.4132
HLA-G	28	0.982143	28	1	aa_169R	0.413
HLA-G	28	0.0178571	28	0	aa_170R	0.4132
HLA-G	28	0.982143	28	1	aa_170K	0.413
HLA-G	28	0.0178571	28	0	aa_171S	0.4132
HLA-G	28	0.982143	28	1	aa_171C	0.413
HLA-G	28	0.0178571	28	0	aa_172P	0.4132
HLA-G	28	0.982143	28	1	aa_172E	0.413
HLA-G	28	0.982143	28	1	aa_173A	0.413
HLA-G	28	0.0178571	28	0	aa_173S	0.4132
HLA-G	28	0.982143	28	1	aa_175N	0.413
HLA-G	28	0.0178571	28	0	aa_175S	0.4132
HLA-G	28	0.0178571	28	0	aa_177del	0.4132
HLA-G	28	0.982143	28	1	aa_177A	0.413
HLA-G	28	0.0178571	28	0	aa_178del	0.4132
HLA-G	28	0.982143	28	1	aa_178E	0.413
HLA-G	28	0.0178571	28	0	aa_179del	0.4132
HLA-G	28	0.982143	28	1	aa_179Q	0.413
HLA-G	28	0.0178571	28	0	aa_182P	0.4132
HLA-G	28	0.982143	28	1	aa_182A	0.413
HLA-G	28	0.0178571	28	0	aa_183M	0.4132
HLA-G	28	0.982143	28	1	aa_183Y	0.413
HLA-G	28	0.0178571	28	0	aa_184del	0.4132
HLA-G	28	0.982143	28	1	aa_184L	0.413
HLA-G	28	0.0178571	28	0	aa_185del	0.4132
HLA-G	28	0.982143	28	1	aa_185E	0.413
HLA-G	28	0.0178571	28	0	aa_186del	0.4132
HLA-G	28	0.982143	28	1	aa_186G	0.413
HLA-G	28	0.982143	28	1	aa_187T	0.413
HLA-G	28	0.0178571	28	0	aa_187del	0.4132
HLA-G	28	0.982143	28	1	aa_188C	0.413
HLA-G	28	0.0178571	28	0	aa_188del	0.4132
HLA-G	28	0.982143	28	1	aa_189V	0.413
HLA-G	28	0.0178571	28	0	aa_189del	0.4132
HLA-G	28	0.982143	28	1	aa_190E	0.413
HLA-G	28	0.0178571	28	0	aa_190del	0.4132
HLA-G	28	0.982143	28	1	aa_193H	0.413
HLA-G	28	0.0178571	28	0	aa_193del	0.4132
HLA-G	28	0.0178571	28	0	aa_194del	0.4132
HLA-G	28	0.982143	28	1	aa_194R	0.413
HLA-G	28	0.0178571	28	0	aa_195del	0.4132
HLA-G	28	0.982143	28	1	aa_195Y	0.413
HLA-G	28	0.982143	28	1	aa_196L	0.413
HLA-G	28	0.0178571	28	0	aa_196del	0.4132
HLA-G	28	0.0178571	28	0	aa_197del	0.4132
HLA-G	28	0.982143	28	1	aa_197E	0.413
HLA-G	28	0.982143	28	1	aa_199G	0.413
HLA-G	28	0.0178571	28	0	aa_199K	0.4132
HLA-G	28	0.982143	28	1	aa_200K	0.413
HLA-G	28	0.0178571	28	0	aa_200G	0.4132
HLA-G	28	0.0178571	28	0	aa_202P	0.4132
HLA-G	28	0.982143	28	1	aa_202M	0.413
HLA-G	28	0.982143	28	1	aa_203L	0.413
HLA-G	28	0.0178571	28	0	aa_203T	0.4132
HLA-G	28	0.0178571	28	0	aa_204W	0.4132
HLA-G	28	0.982143	28	1	aa_204Q	0.413
HLA-G	28	0.0178571	28	0	aa_207del	0.4132
HLA-G	28	0.982143	28	1	aa_207D	0.413
HLA-G	28	0.982143	28	1	aa_208P	0.413
HLA-G	28	0.0178571	28	0	aa_208del	0.4132
HLA-G	28	0.0178571	28	0	aa_209del	0.4132
HLA-G	28	0.982143	28	1	aa_209P	0.413
HLA-G	28	0.982143	28	1	aa_210K	0.413
HLA-G	28	0.0178571	28	0	aa_210del	0.4132
HLA-G	28	0.982143	28	1	aa_211T	0.413
HLA-G	28	0.0178571	28	0	aa_211del	0.4132
HLA-G	28	0.0178571	28	0	aa_212del	0.4132
HLA-G	28	0.982143	28	1	aa_212H	0.413
HLA-G	28	0.982143	28	1	aa_213V	0.413
HLA-G	28	0.0178571	28	0	aa_213del	0.4132
HLA-G	28	0.0178571	28	0	aa_214del	0.4132
HLA-G	28	0.982143	28	1	aa_214T	0.413
HLA-G	28	0.0178571	28	0	aa_215del	0.4132
HLA-G	28	0.982143	28	1	aa_215H	0.413
HLA-G	28	0.982143	28	1	aa_216H	0.413
HLA-G	28	0.0178571	28	0	aa_216del	0.4132
HLA-G	28	0.982143	28	1	aa_217P	0.413
HLA-G	28	0.0178571	28	0	aa_217del	0.4132
HLA-G	28	0.0178571	28	0	aa_218del	0.4132
HLA-G	28	0.982143	28	1	aa_218V	0.413
HLA-G	28	0.982143	28	1	aa_219F	0.413
HLA-G	28	0.0178571	28	0	aa_219del	0.4132
HLA-G	28	0.0178571	28	0	aa_220del	0.4132
HLA-G	28	0.982143	28	1	aa_220D	0.413
HLA-G	28	0.982143	28	1	aa_221Y	0.413
HLA-G	28	0.0178571	28	0	aa_221del	0.4132
HLA-G	28	0.982143	28	1	aa_222E	0.413
HLA-G	28	0.0178571	28	0	aa_222del	0.4132
HLA-G	28	0.982143	28	1	aa_223A	0.413
HLA-G	28	0.0178571	28	0	aa_223del	0.4132
HLA-G	28	0.0178571	28	0	aa_224del	0.4132
HLA-G	28	0.982143	28	1	aa_224T	0.413
HLA-G	28	0.982143	28	1	aa_225L	0.413
HLA-G	28	0.0178571	28	0	aa_225del	0.4132
HLA-G	28	0.982143	28	1	aa_227C	0.413
HLA-G	28	0.0178571	28	0	aa_227A	0.4132
HLA-G	28	0.982143	28	1	aa_229A	0.413
HLA-G	28	0.0178571	28	0	aa_229S	0.4132
HLA-G	28	0.982143	28	1	aa_230L	0.413
HLA-G	28	0.0178571	28	0	aa_230del	0.4132
HLA-G	28	0.982143	28	1	aa_231G	0.413
HLA-G	28	0.0178571	28	0	aa_231del	0.4132
HLA-G	28	0.982143	28	1	aa_232F	0.413
HLA-G	28	0.0178571	28	0	aa_232del	0.4132
HLA-G	28	0.982143	28	1	aa_233Y	0.413
HLA-G	28	0.0178571	28	0	aa_233del	0.4132
HLA-G	28	0.982143	28	1	aa_234P	0.413
HLA-G	28	0.0178571	28	0	aa_234del	0.4132
HLA-G	28	0.0178571	28	0	aa_235del	0.4132
HLA-G	28	0.982143	28	1	aa_235A	0.413
HLA-G	28	0.0178571	28	0	aa_236del	0.4132
HLA-G	28	0.982143	28	1	aa_236E	0.413
HLA-G	28	0.982143	28	1	aa_237I	0.413
HLA-G	28	0.0178571	28	0	aa_237del	0.4132
HLA-G	28	0.982143	28	1	aa_238I	0.413
HLA-G	28	0.0178571	28	0	aa_238del	0.4132
HLA-G	28	0.982143	28	1	aa_239L	0.413
HLA-G	28	0.0178571	28	0	aa_239del	0.4132
HLA-G	28	0.982143	28	1	aa_240T	0.413
HLA-G	28	0.0178571	28	0	aa_240del	0.4132
HLA-G	28	0.982143	28	1	aa_241W	0.413
HLA-G	28	0.0178571	28	0	aa_241del	0.4132
HLA-G	28	0.982143	28	1	aa_242Q	0.413
HLA-G	28	0.0178571	28	0	aa_242del	0.4132
HLA-G	28	0.982143	28	1	aa_243R	0.413
HLA-G	28	0.0178571	28	0	aa_243del	0.4132
HLA-G	28	0.982143	28	1	aa_244D	0.413
HLA-G	28	0.0178571	28	0	aa_244del	0.4132
HLA-G	28	0.982143	28	1	aa_245G	0.413
HLA-G	28	0.0178571	28	0	aa_245del	0.4132
HLA-G	28	0.982143	28	1	aa_246E	0.413
HLA-G	28	0.0178571	28	0	aa_246del	0.4132
HLA-G	28	0.0178571	28	0	aa_247del	0.4132
HLA-G	28	0.982143	28	1	aa_247D	0.413
HLA-G	28	0.982143	28	1	aa_248Q	0.413
HLA-G	28	0.0178571	28	0	aa_248del	0.4132
HLA-G	28	0.982143	28	1	aa_249T	0.413
HLA-G	28	0.0178571	28	0	aa_249del	0.4132
HLA-G	28	0.982143	28	1	aa_250Q	0.413
HLA-G	28	0.0178571	28	0	aa_250del	0.4132
HLA-G	28	0.982143	28	1	aa_251D	0.413
HLA-G	28	0.0178571	28	0	aa_251del	0.4132
HLA-G	28	0.0178571	28	0	aa_252del	0.4132
HLA-G	28	0.982143	28	1	aa_252V	0.413
HLA-G	28	0.982143	28	1	aa_253E	0.413
HLA-G	28	0.0178571	28	0	aa_253del	0.4132
HLA-G	28	0.982143	28	1	aa_254L	0.413
HLA-G	28	0.0178571	28	0	aa_254del	0.4132
HLA-G	28	0.982143	28	1	aa_255V	0.413
HLA-G	28	0.0178571	28	0	aa_255del	0.4132
HLA-G	28	0.982143	28	1	aa_256E	0.413
HLA-G	28	0.0178571	28	0	aa_256del	0.4132
HLA-G	28	0.982143	28	1	aa_257T	0.413
HLA-G	28	0.0178571	28	0	aa_257del	0.4132
HLA-G	28	0.982143	28	1	aa_258R	0.413
HLA-G	28	0.0178571	28	0	aa_258del	0.4132
HLA-G	28	0.982143	28	1	aa_259P	0.413
HLA-G	28	0.0178571	28	0	aa_259del	0.4132
HLA-G	28	0.982143	28	1	aa_260A	0.413
HLA-G	28	0.0178571	28	0	aa_260del	0.4132
HLA-G	28	0.982143	28	1	aa_261G	0.413
HLA-G	28	0.0178571	28	0	aa_261del	0.4132
HLA-G	28	0.0178571	28	0	aa_262del	0.4132
HLA-G	28	0.982143	28	1	aa_262D	0.413
HLA-G	28	0.982143	28	1	aa_264T	0.413
HLA-G	28	0.0178571	28	0	aa_264S	0.4132
HLA-G	28	0.982143	28	1	aa_265F	0.413
HLA-G	28	0.0178571	28	0	aa_265T	0.4132
HLA-G	28	0.982143	28	1	aa_266Q	0.413
HLA-G	28	0.0178571	28	0	aa_266D	0.4132
HLA-G	28	0.982143	28	1	aa_267K	0.413
HLA-G	28	0.0178571	28	0	aa_267T	0.4132
HLA-G	28	0.982143	28	1	aa_269A	0.413
HLA-G	28	0.0178571	28	0	aa_269del	0.4132
HLA-G	28	0.0178571	28	0	aa_270del	0.4132
HLA-G	28	0.982143	28	1	aa_270A	0.413
HLA-G	28	0.0178571	28	0	aa_271del	0.4132
HLA-G	28	0.982143	28	1	aa_271V	0.413
HLA-G	28	0.982143	28	1	aa_272V	0.413
HLA-G	28	0.0178571	28	0	aa_272del	0.4132
HLA-G	28	0.0178571	28	0	aa_273del	0.4132
HLA-G	28	0.982143	28	1	aa_273V	0.413
HLA-G	28	0.0178571	28	0	aa_274del	0.4132
HLA-G	28	0.982143	28	1	aa_274P	0.413
HLA-G	28	0.0178571	28	0	aa_275del	0.4132
HLA-G	28	0.982143	28	1	aa_275S	0.413
HLA-G	28	0.0178571	28	0	aa_276del	0.4132
HLA-G	28	0.982143	28	1	aa_276G	0.413
HLA-G	28	0.982143	28	1	aa_277E	0.413
HLA-G	28	0.0178571	28	0	aa_277R	0.4132
HLA-G	28	0.982143	28	1	aa_278E	0.413
HLA-G	28	0.0178571	28	0	aa_278T	0.4132
HLA-G	28	0.0178571	28	0	aa_279G	0.4132
HLA-G	28	0.982143	28	1	aa_279Q	0.413
HLA-G	28	0.0178571	28	0	aa_281R	0.4132
HLA-G	28	0.982143	28	1	aa_281Y	0.413
HLA-G	28	0	28	0.0357143	aa_282M	0.2329
HLA-G	28	0.982143	28	0.964286	aa_282T	0.624
HLA-G	28	0.0178571	28	0	aa_282C	0.4132
HLA-G	28	0.982143	28	1	aa_284H	0.413
HLA-G	28	0.0178571	28	0	aa_284del	0.4132
HLA-G	28	0.982143	28	1	aa_285V	0.413
HLA-G	28	0.0178571	28	0	aa_285del	0.4132
HLA-G	28	0.0178571	28	0	aa_286del	0.4132
HLA-G	28	0.982143	28	1	aa_286Q	0.413
HLA-G	28	0.0178571	28	0	aa_287del	0.4132
HLA-G	28	0.982143	28	1	aa_287H	0.413
HLA-G	28	0.982143	28	1	aa_288E	0.413
HLA-G	28	0.0178571	28	0	aa_288del	0.4132
HLA-G	28	0.0178571	28	0	aa_289del	0.4132
HLA-G	28	0.982143	28	1	aa_289G	0.413
HLA-G	28	0.0178571	28	0	aa_290del	0.4132
HLA-G	28	0.982143	28	1	aa_290L	0.413
HLA-G	28	0.982143	28	1	aa_291P	0.413
HLA-G	28	0.0178571	28	0	aa_291del	0.4132
HLA-G	28	0.982143	28	1	aa_292E	0.413
HLA-G	28	0.0178571	28	0	aa_292del	0.4132
HLA-G	28	0.0178571	28	0	aa_293del	0.4132
HLA-G	28	0.982143	28	1	aa_293P	0.413
HLA-G	28	0.982143	28	1	aa_294L	0.413
HLA-G	28	0.0178571	28	0	aa_294del	0.4132
HLA-G	28	0.0178571	28	0	aa_295del	0.4132
HLA-G	28	0.982143	28	1	aa_295M	0.413
HLA-G	28	0.0178571	28	0	aa_296del	0.4132
HLA-G	28	0.982143	28	1	aa_296L	0.413
HLA-G	28	0.982143	28	1	aa_297R	0.413
HLA-G	28	0.0178571	28	0	aa_297del	0.4132
HLA-G	28	0.982143	28	1	aa_298W	0.413
HLA-G	28	0.0178571	28	0	aa_298del	0.4132
HLA-G	28	0.982143	28	1	aa_299K	0.413
HLA-G	28	0.0178571	28	0	aa_299del	0.4132
HLA-G	28	0.982143	28	1	aa_300Q	0.413
HLA-G	28	0.0178571	28	0	aa_300del	0.4132
HLA-G	28	0.0178571	28	0	aa_301del	0.4132
HLA-G	28	0.982143	28	1	aa_301S	0.413
HLA-G	28	0.0178571	28	0	aa_303A	0.4132
HLA-G	28	0.982143	28	1	aa_303L	0.413
HLA-G	28	0.982143	28	1	aa_304P	0.413
HLA-G	28	0.0178571	28	0	aa_304R	0.4132
HLA-G	28	0.0178571	28	0	aa_306P	0.4132
HLA-G	28	0.982143	28	1	aa_306I	0.413
HLA-G	28	0.0178571	28	0	aa_308del	0.4132
HLA-G	28	0.982143	28	1	aa_308I	0.413
HLA-G	28	0.0178571	28	0	aa_309del	0.4132
HLA-G	28	0.982143	28	1	aa_309M	0.413
HLA-G	28	0.0178571	28	0	aa_310del	0.4132
HLA-G	28	0.982143	28	1	aa_310G	0.413
HLA-G	28	0.982143	28	1	aa_311I	0.413
HLA-G	28	0.0178571	28	0	aa_311del	0.4132
HLA-G	28	0.982143	28	1	aa_312V	0.413
HLA-G	28	0.0178571	28	0	aa_312del	0.4132
HLA-G	28	0.982143	28	1	aa_313A	0.413
HLA-G	28	0.0178571	28	0	aa_313del	0.4132
HLA-G	28	0.982143	28	1	aa_314G	0.413
HLA-G	28	0.0178571	28	0	aa_314del	0.4132
HLA-G	28	0.982143	28	1	aa_315L	0.413
HLA-G	28	0.0178571	28	0	aa_315del	0.4132
HLA-G	28	0.0178571	28	0	aa_316del	0.4132
HLA-G	28	0.982143	28	1	aa_316V	0.413
HLA-G	28	0.0178571	28	0	aa_317del	0.4132
HLA-G	28	0.982143	28	1	aa_317V	0.413
HLA-G	28	0.0178571	28	0	aa_318del	0.4132
HLA-G	28	0.982143	28	1	aa_318L	0.413
HLA-G	28	0.0178571	28	0	aa_319del	0.4132
HLA-G	28	0.982143	28	1	aa_319A	0.413
HLA-G	28	0.982143	28	1	aa_320A	0.413
HLA-G	28	0.0178571	28	0	aa_320del	0.4132
HLA-G	28	0.0178571	28	0	aa_321del	0.4132
HLA-G	28	0.982143	28	1	aa_321V	0.413
HLA-G	28	0.0178571	28	0	aa_322del	0.4132
HLA-G	28	0.982143	28	1	aa_322V	0.413
HLA-G	28	0.982143	28	1	aa_323T	0.413
HLA-G	28	0.0178571	28	0	aa_323del	0.4132
HLA-G	28	0.982143	28	1	aa_324G	0.413
HLA-G	28	0.0178571	28	0	aa_324del	0.4132
HLA-G	28	0.982143	28	1	aa_325A	0.413
HLA-G	28	0.0178571	28	0	aa_325del	0.4132
HLA-G	28	0.982143	28	1	aa_326A	0.413
HLA-G	28	0.0178571	28	0	aa_326del	0.4132
HLA-G	28	0.0178571	28	0	aa_327del	0.4132
HLA-G	28	0.982143	28	1	aa_327V	0.413
HLA-G	28	0.0178571	28	0	aa_328del	0.4132
HLA-G	28	0.982143	28	1	aa_328A	0.413
HLA-G	28	0.982143	28	1	aa_329A	0.413
HLA-G	28	0.0178571	28	0	aa_329del	0.4132
HLA-G	28	0.0178571	28	0	aa_330del	0.4132
HLA-G	28	0.982143	28	1	aa_330V	0.413
HLA-G	28	0.0178571	28	0	aa_331del	0.4132
HLA-G	28	0.982143	28	1	aa_331L	0.413
HLA-G	28	0.982143	28	1	aa_332W	0.413
HLA-G	28	0.0178571	28	0	aa_332del	0.4132
HLA-G	28	0.982143	28	1	aa_334K	0.413
HLA-G	28	0.0178571	28	0	aa_334H	0.4132
HLA-G	28	0.982143	28	1	aa_335K	0.413
HLA-G	28	0.0178571	28	0	aa_335T	0.4132
HLA-G	28	0.982143	28	1	aa_336S	0.413
HLA-G	28	0.0178571	28	0	aa_336X	0.4132
HLA-G	28	0.0178571	28	0	aa_337del	0.4132
HLA-G	28	0.982143	28	1	aa_337S	0.413
HLA-G	28	0.0178571	28	0	aa_338del	0.4132
HLA-G	28	0.982143	28	1	aa_338D	0.413
HLA-G	28	0.0178571	28	0	aa_339del	0.4132
HLA-G	28	0.982143	28	1	aa_339X	0.413
MICA	28	0.964286	28	0.946429	aa_29R	0.6387
MICA	28	0.0357143	28	0.0535714	aa_29P	0.63875
MICA	28	0.232143	28	0.178571	aa_37G	0.44231
MICA	28	0.767857	28	0.821429	aa_37W	0.4423
MICA	28	0.0892857	28	0.0714286	aa_47T	0.7511
MICA	28	0.910714	28	0.928571	aa_47A	0.751
MICA	28	0.339286	28	0.267857	aa_59C	0.429
MICA	28	0.660714	28	0.732143	aa_59Y	0.429
MICA	28	0.0357143	28	0.0178571	aa_114R	0.8191
MICA	28	0.964286	28	0.982143	aa_114Q	0.819
MICA	28	0.732143	28	0.785714	aa_145L	0.8163
MICA	28	0.267857	28	0.214286	aa_145V	0.8163
MICA	28	0.946429	28	0.964286	aa_148E	0.673
MICA	28	0.0535714	28	0.0357143	aa_148K	0.6728
MICA	28	0.339286	28	0.267857	aa_152M	0.429
MICA	28	0.660714	28	0.732143	aa_152V	0.429
MICA	28	0.928571	28	0.946429	aa_174M	0.512
MICA	28	0.0714286	28	0.0535714	aa_174V	0.51194
MICA	28	0	28	0.0178571	aa_179L	0.3058
MICA	28	1	28	0.982143	aa_179H	0.306
MICA	28	0.660714	28	0.732143	aa_196E	0.429
MICA	28	0.339286	28	0.267857	aa_196K	0.429
MICA	28	0.357143	28	0.339286	aa_198S	0.9519
MICA	28	0.642857	28	0.660714	aa_198G	0.9519
MICA	28	0	28	0.0178571	aa_199I	0.35019
MICA	28	1	28	0.982143	aa_199V	0.35
MICA	28	0.821429	28	0.910714	aa_204T	0.353
MICA	28	0.178571	28	0.0892857	aa_204R	0.3532
MICA	28	0.339286	28	0.267857	aa_229G	0.429
MICA	28	0.660714	28	0.732143	aa_229S	0.429
MICA	28	0.660714	28	0.732143	aa_233R	0.429
MICA	28	0.339286	28	0.267857	aa_233W	0.429
MICA	28	0.392857	28	0.517857	aa_236I	0.3344
MICA	28	0.607143	28	0.482143	aa_236T	0.33442
MICA	28	0.660714	28	0.732143	aa_238T	0.429
MICA	28	0.339286	28	0.267857	aa_238S	0.429
MICA	28	0.946429	28	0.946429	aa_244V	0.731
MICA	28	0.0535714	28	0.0535714	aa_244L	0.7314
MICA	28	0.392857	28	0.517857	aa_274R	0.3344
MICA	28	0.607143	28	0.464286	aa_274Q	0.22976
MICA	28	0	28	0.0178571	aa_274E	0.23387
MICA	28	0.928571	28	0.946429	aa_294P	0.512
MICA	28	0.0714286	28	0.0535714	aa_294A	0.51194
MICA	28	0.0357143	28	0.0178571	aa_300C	0.8191
MICA	28	0.964286	28	0.982143	aa_300V	0.819
MICA	28	0.0357143	28	0.0178571	aa_301W	0.8191
MICA	28	0.964286	28	0.982143	aa_301L	0.819
MICA	28	0.964286	28	0.982143	aa_302del	0.819
MICA	28	0.0357143	28	0.0178571	aa_302C	0.8191
MICA	28	0.964286	28	0.982143	aa_303del	0.819
MICA	28	0.0357143	28	0.0178571	aa_303F	0.8191
MICA	28	0.0357143	28	0.0178571	aa_304R	0.8191
MICA	28	0.964286	28	0.982143	aa_304del	0.819
MICA	28	0.0357143	28	0.0178571	aa_306I	0.8191
MICA	28	0.964286	28	0.982143	aa_306L	0.819
MICA	28	0.0357143	28	0.0178571	aa_307G	0.8191
MICA	28	0.964286	28	0.982143	aa_307Q	0.819
MICA	28	0.964286	28	0.982143	aa_308S	0.819
MICA	28	0.0357143	28	0.0178571	aa_308R	0.8191
MICA	28	0.964286	28	0.982143	aa_310W	0.819
MICA	28	0.0357143	28	0.0178571	aa_310del	0.8191
MICA	28	0.964286	28	0.982143	aa_311Q	0.819
MICA	28	0.0357143	28	0.0178571	aa_311S	0.8191
MICA	28	0.964286	28	0.982143	aa_312T	0.819
MICA	28	0.0357143	28	0.0178571	aa_312M	0.8191
MICA	28	0.964286	28	0.982143	aa_314H	0.819
MICA	28	0.0357143	28	0.0178571	aa_314L	0.8191
MICA	28	0.0357143	28	0.0178571	aa_315L	0.8191
MICA	28	0.964286	28	0.982143	aa_315V	0.819
MICA	28	0.964286	28	0.982143	aa_316S	0.819
MICA	28	0.0357143	28	0.0178571	aa_316L	0.8191
MICA	28	0.0357143	28	0.0178571	aa_317L	0.8191
MICA	28	0.964286	28	0.982143	aa_317A	0.819
MICA	28	0.964286	28	0.982143	aa_318V	0.819
MICA	28	0.0357143	28	0.0178571	aa_318L	0.8191
MICA	28	0.875	28	0.892857	aa_319del	0.642
MICA	28	0.125	28	0.107143	aa_319A	0.6422
MICA	28	0.125	28	0.107143	aa_320A	0.6422
MICA	28	0.875	28	0.892857	aa_320del	0.642
MICA	28	0.875	28	0.892857	aa_321del	0.642
MICA	28	0.125	28	0.107143	aa_321A	0.6422
MICA	28	0.464286	28	0.375	aa_322A	0.39464
MICA	28	0.5	28	0.607143	aa_322del	0.3635
MICA	28	0.0357143	28	0.0178571	aa_322L	0.8191
MICA	28	0.0357143	28	0.0178571	aa_323L	0.8191
MICA	28	0.857143	28	0.892857	aa_323A	0.791
MICA	28	0.107143	28	0.0892857	aa_323del	0.8745
MICA	28	0.0357143	28	0.0178571	aa_324L	0.8191
MICA	28	0.964286	28	0.982143	aa_324A	0.819
MICA	28	0.696429	28	0.607143	aa_325A	0.42472
MICA	28	0.0357143	28	0.0178571	aa_325L	0.8191
MICA	28	0.267857	28	0.375	aa_325G	0.371
MICA	28	0.0357143	28	0.0178571	aa_326L	0.8191
MICA	28	0.267857	28	0.375	aa_326C	0.371
MICA	28	0.696429	28	0.607143	aa_326A	0.42472
MICA	28	0.0357143	28	0.0178571	aa_327L	0.8191
MICA	28	0.267857	28	0.375	aa_327C	0.371
MICA	28	0.696429	28	0.607143	aa_327A	0.42472
MICA	28	0.696429	28	0.607143	aa_328I	0.42472
MICA	28	0.267857	28	0.375	aa_328Y	0.371
MICA	28	0.0357143	28	0.0178571	aa_328L	0.8191
MICA	28	0.267857	28	0.375	aa_330C	0.371
MICA	28	0.696429	28	0.607143	aa_330V	0.42472
MICA	28	0.0357143	28	0.0178571	aa_330L	0.8191
MICA	28	0.0357143	28	0.0178571	aa_331L	0.8191
MICA	28	0.267857	28	0.375	aa_331del	0.371
MICA	28	0.696429	28	0.607143	aa_331I	0.42472
MICA	28	0.696429	28	0.607143	aa_332I	0.42472
MICA	28	0.267857	28	0.375	aa_332del	0.371
MICA	28	0.0357143	28	0.0178571	aa_332L	0.8191
MICA	28	0.696429	28	0.607143	aa_333I	0.42472
MICA	28	0.267857	28	0.375	aa_333Y	0.371
MICA	28	0.0357143	28	0.0178571	aa_333L	0.8191
MICA	28	0.732143	28	0.625	aa_334F	0.37144
MICA	28	0.267857	28	0.375	aa_334Y	0.371
MICA	28	0.964286	28	0.982143	aa_335Y	0.819
MICA	28	0.0357143	28	0.0178571	aa_335S	0.8191
MICA	28	0.0357143	28	0.0178571	aa_336T	0.8191
MICA	28	0.267857	28	0.375	aa_336F	0.371
MICA	28	0.696429	28	0.607143	aa_336V	0.42472
MICA	28	0.267857	28	0.375	aa_337L	0.371
MICA	28	0.0357143	28	0.0178571	aa_337del	0.8191
MICA	28	0.5	28	0.446429	aa_337R	0.8752
MICA	28	0.196429	28	0.160714	aa_337C	0.43749
MICA	28	0.964286	28	0.982143	aa_338C	0.819
MICA	28	0.0357143	28	0.0178571	aa_338del	0.8191
MICA	28	0.303571	28	0.392857	aa_339del	0.4247
MICA	28	0.696429	28	0.607143	aa_339C	0.42472
MICA	28	0.696429	28	0.607143	aa_340K	0.42472
MICA	28	0.303571	28	0.392857	aa_340del	0.4247
MICA	28	0.696429	28	0.607143	aa_341K	0.42472
MICA	28	0.303571	28	0.392857	aa_341del	0.4247
MICA	28	0.696429	28	0.607143	aa_342K	0.42472
MICA	28	0.303571	28	0.392857	aa_342del	0.4247
MICA	28	0.303571	28	0.392857	aa_343del	0.4247
MICA	28	0.696429	28	0.607143	aa_343T	0.42472
MICA	28	0.303571	28	0.392857	aa_344del	0.4247
MICA	28	0.696429	28	0.607143	aa_344S	0.42472
MICA	28	0.696429	28	0.607143	aa_345A	0.42472
MICA	28	0.303571	28	0.392857	aa_345del	0.4247
MICA	28	0.696429	28	0.607143	aa_346A	0.42472
MICA	28	0.303571	28	0.392857	aa_346del	0.4247
MICA	28	0.303571	28	0.392857	aa_347del	0.4247
MICA	28	0.696429	28	0.607143	aa_347E	0.42472
MICA	28	0.696429	28	0.607143	aa_348G	0.42472
MICA	28	0.303571	28	0.392857	aa_348del	0.4247
MICA	28	0.303571	28	0.392857	aa_349del	0.4247
MICA	28	0.696429	28	0.607143	aa_349P	0.42472
MICA	28	0.696429	28	0.607143	aa_350E	0.42472
MICA	28	0.303571	28	0.392857	aa_350del	0.4247
MICA	28	0.303571	28	0.392857	aa_351del	0.4247
MICA	28	0.696429	28	0.607143	aa_351L	0.42472
MICA	28	0.696429	28	0.607143	aa_352V	0.42472
MICA	28	0.303571	28	0.392857	aa_352del	0.4247
MICA	28	0.267857	28	0.375	aa_353del	0.371
MICA	28	0.732143	28	0.625	aa_353S	0.37144
MICA	28	0.267857	28	0.375	aa_354del	0.371
MICA	28	0.696429	28	0.607143	aa_354L	0.42472
MICA	28	0.0357143	28	0.0178571	aa_354V	0.8191
MICA	28	0.0357143	28	0.0178571	aa_355V	0.8191
MICA	28	0.696429	28	0.607143	aa_355Q	0.42472
MICA	28	0.267857	28	0.375	aa_355del	0.371
MICA	28	0.732143	28	0.625	aa_356V	0.37144
MICA	28	0.267857	28	0.375	aa_356del	0.371
MICA	28	0.0357143	28	0.0178571	aa_357R	0.8191
MICA	28	0.267857	28	0.375	aa_357del	0.371
MICA	28	0.696429	28	0.607143	aa_357L	0.42472
MICA	28	0.0357143	28	0.0178571	aa_358R	0.8191
MICA	28	0.267857	28	0.375	aa_358del	0.371
MICA	28	0.696429	28	0.607143	aa_358D	0.42472
MICA	28	0.696429	28	0.607143	aa_359Q	0.42472
MICA	28	0.0357143	28	0.0178571	aa_359K	0.8191
MICA	28	0.267857	28	0.375	aa_359del	0.371
MICA	28	0.732143	28	0.625	aa_360H	0.37144
MICA	28	0.267857	28	0.375	aa_360del	0.371
MICA	28	0.696429	28	0.607143	aa_361P	0.42472
MICA	28	0.267857	28	0.375	aa_361del	0.371
MICA	28	0.0357143	28	0.0178571	aa_361Q	0.8191
MICA	28	0.696429	28	0.607143	aa_362V	0.42472
MICA	28	0.303571	28	0.392857	aa_362del	0.4247
MICA	28	0.303571	28	0.392857	aa_363del	0.4247
MICA	28	0.696429	28	0.607143	aa_363G	0.42472
MICA	28	0.696429	28	0.607143	aa_364T	0.42472
MICA	28	0.303571	28	0.392857	aa_364del	0.4247
MICA	28	0.696429	28	0.607143	aa_365S	0.42472
MICA	28	0.303571	28	0.392857	aa_365del	0.4247
MICA	28	0.696429	28	0.607143	aa_366D	0.42472
MICA	28	0.303571	28	0.392857	aa_366del	0.4247
MICA	28	0.696429	28	0.607143	aa_367H	0.42472
MICA	28	0.303571	28	0.392857	aa_367del	0.4247
MICA	28	0.696429	28	0.607143	aa_368R	0.42472
MICA	28	0.303571	28	0.392857	aa_368del	0.4247
MICA	28	0.696429	28	0.607143	aa_369D	0.42472
MICA	28	0.303571	28	0.392857	aa_369del	0.4247
MICA	28	0.696429	28	0.607143	aa_370A	0.42472
MICA	28	0.303571	28	0.392857	aa_370del	0.4247
MICA	28	0.696429	28	0.607143	aa_371T	0.42472
MICA	28	0.303571	28	0.392857	aa_371del	0.4247
MICA	28	0.303571	28	0.392857	aa_372del	0.4247
MICA	28	0.696429	28	0.607143	aa_372Q	0.42472
MICA	28	0.303571	28	0.392857	aa_373del	0.4247
MICA	28	0.696429	28	0.607143	aa_373L	0.42472
MICA	28	0.303571	28	0.392857	aa_374del	0.4247
MICA	28	0.696429	28	0.607143	aa_374G	0.42472
MICA	28	0.696429	28	0.607143	aa_375F	0.42472
MICA	28	0.267857	28	0.375	aa_375del	0.371
MICA	28	0.0357143	28	0.0178571	aa_375L	0.8191
MICA	28	0.267857	28	0.375	aa_376del	0.371
MICA	28	0.732143	28	0.625	aa_376Q	0.37144
MICA	28	0.964286	28	0.982143	aa_377P	0.819
MICA	28	0.0357143	28	0.0178571	aa_377R	0.8191
MICA	28	0.964286	28	0.982143	aa_378L	0.819
MICA	28	0.0357143	28	0.0178571	aa_378V	0.8191
MICA	28	0.0357143	28	0.0178571	aa_379Q	0.8191
MICA	28	0.696429	28	0.607143	aa_379M	0.42472
MICA	28	0.267857	28	0.375	aa_379L	0.371
MICA	28	0.267857	28	0.375	aa_380X	0.371
MICA	28	0.732143	28	0.625	aa_380S	0.37144
MICA	28	0.446429	28	0.410714	aa_381A	0.8045
MICA	28	0.25	28	0.196429	aa_381D	0.50865
MICA	28	0.267857	28	0.375	aa_381del	0.371
MICA	28	0.0357143	28	0.0178571	aa_381S	0.8191
MICA	28	0.0357143	28	0.0178571	aa_382X	0.8191
MICA	28	0.696429	28	0.607143	aa_382L	0.42472
MICA	28	0.267857	28	0.375	aa_382del	0.371
MICA	28	0.696429	28	0.607143	aa_383G	0.42472
MICA	28	0.303571	28	0.392857	aa_383del	0.4247
MICA	28	0.696429	28	0.607143	aa_384S	0.42472
MICA	28	0.303571	28	0.392857	aa_384del	0.4247
MICA	28	0.660714	28	0.553571	aa_385T	0.4173
MICA	28	0.303571	28	0.392857	aa_385del	0.4247
MICA	28	0.0357143	28	0.0535714	aa_385A	0.879
MICA	28	0.303571	28	0.392857	aa_386del	0.4247
MICA	28	0.696429	28	0.607143	aa_386G	0.42472
MICA	28	0.696429	28	0.607143	aa_387S	0.42472
MICA	28	0.303571	28	0.392857	aa_387del	0.4247
MICA	28	0.303571	28	0.392857	aa_388del	0.4247
MICA	28	0.696429	28	0.607143	aa_388T	0.42472
MICA	28	0.696429	28	0.607143	aa_389E	0.42472
MICA	28	0.303571	28	0.392857	aa_389del	0.4247
MICA	28	0.696429	28	0.607143	aa_390G	0.42472
MICA	28	0.303571	28	0.392857	aa_390del	0.4247
MICA	28	0.607143	28	0.571429	aa_391A	0.8603
MICA	28	0.0892857	28	0.0357143	aa_391T	0.20419
MICA	28	0.303571	28	0.392857	aa_391del	0.4247
MICA	28	0.696429	28	0.607143	aa_392X	0.42472
MICA	28	0.303571	28	0.392857	aa_392del	0.4247
MICB	28	1	28	0.982143	aa_11A	0.2273
MICB	28	0	28	0.0178571	aa_11T	0.22734
MICB	28	0.0178571	28	0	aa_55S	0.10254
MICB	28	0.982143	28	1	aa_55P	0.103
MICB	28	1	28	0.982143	aa_64R	0.369
MICB	28	0	28	0.0178571	aa_64C	0.3687
MICB	28	0.928571	28	0.785714	aa_75D	0.04746
MICB	28	0.0714286	28	0.214286	aa_75N	0.0475
MICB	28	0.196429	28	0.25	aa_80E	0.5419
MICB	28	0.803571	28	0.75	aa_80K	0.5419
MICB	28	0.0714286	28	0.0535714	aa_121M	0.54273
MICB	28	0.928571	28	0.946429	aa_121I	0.543
MICB	28	0.196429	28	0.25	aa_136N	0.5419
MICB	28	0.803571	28	0.75	aa_136D	0.5419
MICB	28	0.0178571	28	0	aa_193X	0.849
MICB	28	0.982143	28	1	aa_193R	0.849
MICB	28	0.982143	28	1	aa_194Y	0.849
MICB	28	0.0178571	28	0	aa_194del	0.849
MICB	28	0.0178571	28	0	aa_195del	0.849
MICB	28	0.982143	28	1	aa_195L	0.849
MICB	28	0.0178571	28	0	aa_196del	0.849
MICB	28	0.982143	28	1	aa_196K	0.849
MICB	28	0.0178571	28	0	aa_197del	0.849
MICB	28	0.982143	28	1	aa_197S	0.849
MICB	28	0.0178571	28	0	aa_198del	0.849
MICB	28	0.982143	28	1	aa_198G	0.849
MICB	28	0.982143	28	1	aa_199V	0.849
MICB	28	0.0178571	28	0	aa_199del	0.849
MICB	28	0.982143	28	1	aa_200A	0.849
MICB	28	0.0178571	28	0	aa_200del	0.849
MICB	28	0.0178571	28	0	aa_201del	0.849
MICB	28	0.982143	28	1	aa_201I	0.849
MICB	28	0.0178571	28	0	aa_202del	0.849
MICB	28	0.982143	28	1	aa_202R	0.849
MICB	28	0.0178571	28	0	aa_203del	0.849
MICB	28	0.982143	28	1	aa_203R	0.849
MICB	28	0.982143	28	1	aa_204T	0.849
MICB	28	0.0178571	28	0	aa_204del	0.849
MICB	28	0.982143	28	1	aa_205V	0.849
MICB	28	0.0178571	28	0	aa_205del	0.849
MICB	28	0.982143	28	1	aa_206P	0.849
MICB	28	0.0178571	28	0	aa_206del	0.849
MICB	28	0.0178571	28	0	aa_207del	0.849
MICB	28	0.982143	28	1	aa_207P	0.849
MICB	28	0.982143	28	1	aa_208M	0.849
MICB	28	0.0178571	28	0	aa_208del	0.849
MICB	28	0.0178571	28	0	aa_209del	0.849
MICB	28	0.982143	28	1	aa_209V	0.849
MICB	28	0.0178571	28	0	aa_210del	0.849
MICB	28	0.982143	28	1	aa_210N	0.849
MICB	28	0.0178571	28	0	aa_211del	0.849
MICB	28	0.982143	28	1	aa_211V	0.849
MICB	28	0.946429	28	0.982143	aa_212T	0.844
MICB	28	0.0178571	28	0	aa_212del	0.849
MICB	28	0.0357143	28	0.0178571	aa_212I	0.8191
MICB	28	0.982143	28	1	aa_213C	0.849
MICB	28	0.0178571	28	0	aa_213del	0.849
MICB	28	0.982143	28	1	aa_214S	0.849
MICB	28	0.0178571	28	0	aa_214del	0.849
MICB	28	0.982143	28	1	aa_215E	0.849
MICB	28	0.0178571	28	0	aa_215del	0.849
MICB	28	0.0178571	28	0	aa_216del	0.849
MICB	28	0.982143	28	1	aa_216V	0.849
MICB	28	0.0178571	28	0	aa_217del	0.849
MICB	28	0.982143	28	1	aa_217S	0.849
MICB	28	0.0178571	28	0	aa_218del	0.849
MICB	28	0.982143	28	1	aa_218E	0.849
MICB	28	0.982143	28	1	aa_219G	0.849
MICB	28	0.0178571	28	0	aa_219del	0.849
MICB	28	0.0178571	28	0	aa_220del	0.849
MICB	28	0.982143	28	1	aa_220N	0.849
MICB	28	0.0178571	28	0	aa_221del	0.849
MICB	28	0.982143	28	1	aa_221I	0.849
MICB	28	0.982143	28	1	aa_222T	0.849
MICB	28	0.0178571	28	0	aa_222del	0.849
MICB	28	0.982143	28	1	aa_223V	0.849
MICB	28	0.0178571	28	0	aa_223del	0.849
MICB	28	0.0178571	28	0	aa_224del	0.849
MICB	28	0.982143	28	1	aa_224T	0.849
MICB	28	0.982143	28	1	aa_225C	0.849
MICB	28	0.0178571	28	0	aa_225del	0.849
MICB	28	0.982143	28	1	aa_226R	0.849
MICB	28	0.0178571	28	0	aa_226del	0.849
MICB	28	0.982143	28	1	aa_227A	0.849
MICB	28	0.0178571	28	0	aa_227del	0.849
MICB	28	0.0178571	28	0	aa_228del	0.849
MICB	28	0.982143	28	1	aa_228S	0.849
MICB	28	0.982143	28	1	aa_229S	0.849
MICB	28	0.0178571	28	0	aa_229del	0.849
MICB	28	0.982143	28	1	aa_230F	0.849
MICB	28	0.0178571	28	0	aa_230del	0.849
MICB	28	0.982143	28	1	aa_231Y	0.849
MICB	28	0.0178571	28	0	aa_231del	0.849
MICB	28	0.0178571	28	0	aa_232del	0.849
MICB	28	0.982143	28	1	aa_232P	0.849
MICB	28	0.0178571	28	0	aa_233del	0.849
MICB	28	0.982143	28	1	aa_233R	0.849
MICB	28	0.0178571	28	0	aa_234del	0.849
MICB	28	0.982143	28	1	aa_234N	0.849
MICB	28	0.982143	28	1	aa_235I	0.849
MICB	28	0.0178571	28	0	aa_235del	0.849
MICB	28	0.0178571	28	0	aa_236del	0.849
MICB	28	0.982143	28	1	aa_236T	0.849
MICB	28	0.982143	28	1	aa_237L	0.849
MICB	28	0.0178571	28	0	aa_237del	0.849
MICB	28	0.982143	28	1	aa_238T	0.849
MICB	28	0.0178571	28	0	aa_238del	0.849
MICB	28	0.0178571	28	0	aa_239del	0.849
MICB	28	0.982143	28	1	aa_239W	0.849
MICB	28	0.0178571	28	0	aa_240del	0.849
MICB	28	0.982143	28	1	aa_240R	0.849
MICB	28	0.982143	28	1	aa_241Q	0.849
MICB	28	0.0178571	28	0	aa_241del	0.849
MICB	28	0.0178571	28	0	aa_242del	0.849
MICB	28	0.982143	28	1	aa_242D	0.849
MICB	28	0.982143	28	1	aa_243G	0.849
MICB	28	0.0178571	28	0	aa_243del	0.849
MICB	28	0.982143	28	1	aa_244V	0.849
MICB	28	0.0178571	28	0	aa_244del	0.849
MICB	28	0.0178571	28	0	aa_245del	0.849
MICB	28	0.982143	28	1	aa_245S	0.849
MICB	28	0.0178571	28	0	aa_246del	0.849
MICB	28	0.982143	28	1	aa_246L	0.849
MICB	28	0.0178571	28	0	aa_247del	0.849
MICB	28	0.982143	28	1	aa_247S	0.849
MICB	28	0.982143	28	1	aa_248H	0.849
MICB	28	0.0178571	28	0	aa_248del	0.849
MICB	28	0.982143	28	1	aa_249N	0.849
MICB	28	0.0178571	28	0	aa_249del	0.849
MICB	28	0.982143	28	1	aa_250T	0.849
MICB	28	0.0178571	28	0	aa_250del	0.849
MICB	28	0.982143	28	1	aa_251Q	0.849
MICB	28	0.0178571	28	0	aa_251del	0.849
MICB	28	0.0178571	28	0	aa_252del	0.849
MICB	28	0.982143	28	1	aa_252Q	0.849
MICB	28	0.982143	28	1	aa_253W	0.849
MICB	28	0.0178571	28	0	aa_253del	0.849
MICB	28	0.0178571	28	0	aa_254del	0.849
MICB	28	0.982143	28	1	aa_254G	0.849
MICB	28	0.0178571	28	0	aa_255del	0.849
MICB	28	0.982143	28	1	aa_255D	0.849
MICB	28	0.982143	28	1	aa_256V	0.849
MICB	28	0.0178571	28	0	aa_256del	0.849
MICB	28	0.0178571	28	0	aa_257del	0.849
MICB	28	0.982143	28	1	aa_257L	0.849
MICB	28	0.982143	28	1	aa_258P	0.849
MICB	28	0.0178571	28	0	aa_258del	0.849
MICB	28	0.982143	28	1	aa_259D	0.849
MICB	28	0.0178571	28	0	aa_259del	0.849
MICB	28	0.0178571	28	0	aa_260del	0.849
MICB	28	0.982143	28	1	aa_260G	0.849
MICB	28	0.0178571	28	0	aa_261del	0.849
MICB	28	0.982143	28	1	aa_261N	0.849
MICB	28	0.982143	28	1	aa_262G	0.849
MICB	28	0.0178571	28	0	aa_262del	0.849
MICB	28	0.0178571	28	0	aa_263del	0.849
MICB	28	0.982143	28	1	aa_263T	0.849
MICB	28	0.0178571	28	0	aa_264del	0.849
MICB	28	0.982143	28	1	aa_264Y	0.849
MICB	28	0.0178571	28	0	aa_265del	0.849
MICB	28	0.982143	28	1	aa_265Q	0.849
MICB	28	0.0178571	28	0	aa_266del	0.849
MICB	28	0.982143	28	1	aa_266T	0.849
MICB	28	0.0178571	28	0	aa_267del	0.849
MICB	28	0.982143	28	1	aa_267W	0.849
MICB	28	0.982143	28	1	aa_268V	0.849
MICB	28	0.0178571	28	0	aa_268del	0.849
MICB	28	0.982143	28	1	aa_269A	0.849
MICB	28	0.0178571	28	0	aa_269del	0.849
MICB	28	0.982143	28	1	aa_270T	0.849
MICB	28	0.0178571	28	0	aa_270del	0.849
MICB	28	0.0178571	28	0	aa_271del	0.849
MICB	28	0.982143	28	1	aa_271R	0.849
MICB	28	0.982143	28	1	aa_272I	0.849
MICB	28	0.0178571	28	0	aa_272del	0.849
MICB	28	0.0178571	28	0	aa_273del	0.849
MICB	28	0.982143	28	1	aa_273R	0.849
MICB	28	0.982143	28	1	aa_274Q	0.849
MICB	28	0.0178571	28	0	aa_274del	0.849
MICB	28	0.0178571	28	0	aa_275del	0.849
MICB	28	0.982143	28	1	aa_275G	0.849
MICB	28	0.982143	28	1	aa_276E	0.849
MICB	28	0.0178571	28	0	aa_276del	0.849
MICB	28	0.0178571	28	0	aa_277del	0.849
MICB	28	0.982143	28	1	aa_277E	0.849
MICB	28	0.0178571	28	0	aa_278del	0.849
MICB	28	0.982143	28	1	aa_278Q	0.849
MICB	28	0.982143	28	1	aa_279R	0.849
MICB	28	0.0178571	28	0	aa_279del	0.849
MICB	28	0.0178571	28	0	aa_280del	0.849
MICB	28	0.982143	28	1	aa_280F	0.849
MICB	28	0.0178571	28	0	aa_281del	0.849
MICB	28	0.982143	28	1	aa_281T	0.849
MICB	28	0.982143	28	1	aa_282C	0.849
MICB	28	0.0178571	28	0	aa_282del	0.849
MICB	28	0.982143	28	1	aa_283Y	0.849
MICB	28	0.0178571	28	0	aa_283del	0.849
MICB	28	0.982143	28	1	aa_284M	0.849
MICB	28	0.0178571	28	0	aa_284del	0.849
MICB	28	0.982143	28	1	aa_285E	0.849
MICB	28	0.0178571	28	0	aa_285del	0.849
MICB	28	0.0178571	28	0	aa_286del	0.849
MICB	28	0.982143	28	1	aa_286H	0.849
MICB	28	0.0178571	28	0	aa_287del	0.849
MICB	28	0.982143	28	1	aa_287S	0.849
MICB	28	0.982143	28	1	aa_288G	0.849
MICB	28	0.0178571	28	0	aa_288del	0.849
MICB	28	0.0178571	28	0	aa_289del	0.849
MICB	28	0.982143	28	1	aa_289N	0.849
MICB	28	0.0178571	28	0	aa_290del	0.849
MICB	28	0.982143	28	1	aa_290H	0.849
MICB	28	0.0178571	28	0	aa_291del	0.849
MICB	28	0.946429	28	0.964286	aa_291G	0.98
MICB	28	0.0357143	28	0.0357143	aa_291S	0.9832
MICB	28	0.982143	28	1	aa_292T	0.849
MICB	28	0.0178571	28	0	aa_292del	0.849
MICB	28	0.0178571	28	0	aa_293del	0.849
MICB	28	0.982143	28	1	aa_293H	0.849
MICB	28	0.982143	28	1	aa_294P	0.849
MICB	28	0.0178571	28	0	aa_294del	0.849
MICB	28	0.0178571	28	0	aa_295del	0.849
MICB	28	0.982143	28	1	aa_295V	0.849
MICB	28	0.0178571	28	0	aa_296del	0.849
MICB	28	0.982143	28	1	aa_296P	0.849
MICB	28	0.982143	28	1	aa_297S	0.849
MICB	28	0.0178571	28	0	aa_297del	0.849
MICB	28	0.0178571	28	0	aa_298del	0.849
MICB	28	0.982143	28	1	aa_298G	0.849
MICB	28	0.982143	28	1	aa_299K	0.849
MICB	28	0.0178571	28	0	aa_299del	0.849
MICB	28	0.0178571	28	0	aa_300del	0.849
MICB	28	0.982143	28	1	aa_300A	0.849
MICB	28	0.982143	28	1	aa_301L	0.849
MICB	28	0.0178571	28	0	aa_301del	0.849
MICB	28	0.982143	28	1	aa_302V	0.849
MICB	28	0.0178571	28	0	aa_302del	0.849
MICB	28	0.0178571	28	0	aa_303del	0.849
MICB	28	0.982143	28	1	aa_303L	0.849
MICB	28	0.982143	28	1	aa_304Q	0.849
MICB	28	0.0178571	28	0	aa_304del	0.849
MICB	28	0.982143	28	1	aa_305S	0.849
MICB	28	0.0178571	28	0	aa_305del	0.849
MICB	28	0.0178571	28	0	aa_306del	0.849
MICB	28	0.982143	28	1	aa_306Q	0.849
MICB	28	0.982143	28	1	aa_307R	0.849
MICB	28	0.0178571	28	0	aa_307del	0.849
MICB	28	0.0178571	28	0	aa_308del	0.849
MICB	28	0.982143	28	1	aa_308T	0.849
MICB	28	0.0178571	28	0	aa_309del	0.849
MICB	28	0.982143	28	1	aa_309D	0.849
MICB	28	0.0178571	28	0	aa_310del	0.849
MICB	28	0.982143	28	1	aa_310F	0.849
MICB	28	0.982143	28	1	aa_311P	0.849
MICB	28	0.0178571	28	0	aa_311del	0.849
MICB	28	0.0178571	28	0	aa_312del	0.849
MICB	28	0.982143	28	1	aa_312Y	0.849
MICB	28	0.982143	28	1	aa_313V	0.849
MICB	28	0.0178571	28	0	aa_313del	0.849
MICB	28	0.982143	28	1	aa_314S	0.849
MICB	28	0.0178571	28	0	aa_314del	0.849
MICB	28	0.0178571	28	0	aa_315del	0.849
MICB	28	0.982143	28	1	aa_315A	0.849
MICB	28	0.982143	28	1	aa_316A	0.849
MICB	28	0.0178571	28	0	aa_316del	0.849
MICB	28	0.982143	28	1	aa_317M	0.849
MICB	28	0.0178571	28	0	aa_317del	0.849
MICB	28	0.0178571	28	0	aa_318del	0.849
MICB	28	0.982143	28	1	aa_318P	0.849
MICB	28	0.982143	28	1	aa_319C	0.849
MICB	28	0.0178571	28	0	aa_319del	0.849
MICB	28	0.0178571	28	0	aa_320del	0.849
MICB	28	0.982143	28	1	aa_320F	0.849
MICB	28	0.982143	28	1	aa_321V	0.849
MICB	28	0.0178571	28	0	aa_321del	0.849
MICB	28	0.0178571	28	0	aa_322del	0.849
MICB	28	0.982143	28	1	aa_322I	0.849
MICB	28	0.982143	28	1	aa_323I	0.849
MICB	28	0.0178571	28	0	aa_323del	0.849
MICB	28	0.0178571	28	0	aa_324del	0.849
MICB	28	0.982143	28	1	aa_324I	0.849
MICB	28	0.982143	28	1	aa_325I	0.849
MICB	28	0.0178571	28	0	aa_325del	0.849
MICB	28	0.0178571	28	0	aa_326del	0.849
MICB	28	0.982143	28	1	aa_326L	0.849
MICB	28	0.0178571	28	0	aa_327del	0.849
MICB	28	0.982143	28	1	aa_327C	0.849
MICB	28	0.982143	28	1	aa_328V	0.849
MICB	28	0.0178571	28	0	aa_328del	0.849
MICB	28	0.982143	28	1	aa_329P	0.849
MICB	28	0.0178571	28	0	aa_329del	0.849
MICB	28	0.0178571	28	0	aa_330del	0.849
MICB	28	0.982143	28	1	aa_330C	0.849
MICB	28	0.0178571	28	0	aa_331del	0.849
MICB	28	0.982143	28	1	aa_331C	0.849
MICB	28	0.0178571	28	0	aa_332del	0.849
MICB	28	0.982143	28	1	aa_332K	0.849
MICB	28	0.0178571	28	0	aa_333del	0.849
MICB	28	0.982143	28	1	aa_333K	0.849
MICB	28	0.982143	28	1	aa_334K	0.849
MICB	28	0.0178571	28	0	aa_334del	0.849
MICB	28	0.982143	28	1	aa_335T	0.849
MICB	28	0.0178571	28	0	aa_335del	0.849
MICB	28	0.982143	28	1	aa_336S	0.849
MICB	28	0.0178571	28	0	aa_336del	0.849
MICB	28	0.0178571	28	0	aa_337del	0.849
MICB	28	0.982143	28	1	aa_337A	0.849
MICB	28	0.0178571	28	0	aa_338del	0.849
MICB	28	0.982143	28	1	aa_338A	0.849
MICB	28	0.0178571	28	0	aa_339del	0.849
MICB	28	0.982143	28	1	aa_339E	0.849
MICB	28	0.982143	28	1	aa_340G	0.849
MICB	28	0.0178571	28	0	aa_340del	0.849
MICB	28	0.982143	28	1	aa_341P	0.849
MICB	28	0.0178571	28	0	aa_341del	0.849
MICB	28	0.0178571	28	0	aa_342del	0.849
MICB	28	0.982143	28	1	aa_342E	0.849
MICB	28	0.0178571	28	0	aa_343del	0.849
MICB	28	0.982143	28	1	aa_343L	0.849
MICB	28	0.0178571	28	0	aa_344del	0.849
MICB	28	0.982143	28	1	aa_344V	0.849
MICB	28	0.982143	28	1	aa_345S	0.849
MICB	28	0.0178571	28	0	aa_345del	0.849
MICB	28	0.982143	28	1	aa_346L	0.849
MICB	28	0.0178571	28	0	aa_346del	0.849
MICB	28	0.0178571	28	0	aa_347del	0.849
MICB	28	0.982143	28	1	aa_347Q	0.849
MICB	28	0.0178571	28	0	aa_348del	0.849
MICB	28	0.982143	28	1	aa_348V	0.849
MICB	28	0.982143	28	1	aa_349L	0.849
MICB	28	0.0178571	28	0	aa_349del	0.849
MICB	28	0.0178571	28	0	aa_350del	0.849
MICB	28	0.982143	28	1	aa_350D	0.849
MICB	28	0.0178571	28	0	aa_351del	0.849
MICB	28	0.982143	28	1	aa_351Q	0.849
MICB	28	0.0178571	28	0	aa_352del	0.849
MICB	28	0.982143	28	1	aa_352H	0.849
MICB	28	0.982143	28	1	aa_353P	0.849
MICB	28	0.0178571	28	0	aa_353del	0.849
MICB	28	0.0178571	28	0	aa_354del	0.849
MICB	28	0.982143	28	1	aa_354V	0.849
MICB	28	0.0178571	28	0	aa_355del	0.849
MICB	28	0.982143	28	1	aa_355G	0.849
MICB	28	0.0178571	28	0	aa_356del	0.849
MICB	28	0.982143	28	1	aa_356T	0.849
MICB	28	0.982143	28	1	aa_357G	0.849
MICB	28	0.0178571	28	0	aa_357del	0.849
MICB	28	0.0178571	28	0	aa_358del	0.849
MICB	28	0.982143	28	1	aa_358D	0.849
[truncated: 115 more rows]

## Sheet: Covid-19+men vs Covid-19-men 
Gene	N(Covid-19[-] men)	Frequency(Covid-19[-] men)	N(Covid-19[+] men)	Frequency(Covid-19[+] men)	aa_residue	P-value
HLA-A	29	0.5	51	0.529412	aa_10V	0.621
HLA-A	29	0.5	51	0.470588	aa_10L	0.621
HLA-A	29	0.189655	51	0.0980392	aa_14L	0.156
HLA-A	29	0.810345	51	0.901961	aa_14S	0.156
HLA-A	29	0.241379	51	0.254902	aa_33S	0.822
HLA-A	29	0.172414	51	0.0686275	aa_33T	0.0923
HLA-A	29	0.172414	51	0.127451	aa_33Y	0.538
HLA-A	29	0.413793	51	0.54902	aa_33F	0.0545
HLA-A	29	0.0344828	51	0.00980392	aa_36M	0.216
HLA-A	29	0.965517	51	0.990196	aa_36V	0.216
HLA-A	29	0.948276	51	0.95098	aa_41R	0.723
HLA-A	29	0.0517241	51	0.0490196	aa_41S	0.723
HLA-A	29	0.982759	51	0.990196	aa_67Q	0.7
HLA-A	29	0.0172414	51	0.00980392	aa_67R	0.7
HLA-A	29	0.896552	51	0.843137	aa_68R	0.411
HLA-A	29	0.103448	51	0.156863	aa_68K	0.411
HLA-A	29	0.0862069	51	0.0588235	aa_80R	0.287
HLA-A	29	0.913793	51	0.941176	aa_80G	0.287
HLA-A	29	0.12069	51	0.0882353	aa_86R	0.63
HLA-A	29	0.189655	51	0.205882	aa_86E	0.942
HLA-A	29	0.0689655	51	0.0392157	aa_86L	0.379
HLA-A	29	0.362069	51	0.421569	aa_86Q	0.71
HLA-A	29	0.258621	51	0.245098	aa_86G	0.678
HLA-A	29	0.0689655	51	0.0392157	aa_87Q	0.379
HLA-A	29	0.12069	51	0.0882353	aa_87N	0.63
HLA-A	29	0.810345	51	0.872549	aa_87E	0.327
HLA-A	29	0.189655	51	0.205882	aa_89G	0.942
HLA-A	29	0.810345	51	0.794118	aa_89R	0.942
HLA-A	29	0.448276	51	0.45098	aa_90K	0.756
HLA-A	29	0.551724	51	0.54902	aa_90N	0.756
HLA-A	29	0.896552	51	0.843137	aa_91V	0.411
HLA-A	29	0.103448	51	0.156863	aa_91M	0.411
HLA-A	29	0.724138	51	0.735294	aa_94H	0.643
HLA-A	29	0.275862	51	0.264706	aa_94Q	0.643
HLA-A	29	0.12069	51	0.0490196	aa_97I	0.143
HLA-A	29	0.87931	51	0.95098	aa_97T	0.143
HLA-A	29	0.758621	51	0.77451	aa_98D	0.66
HLA-A	29	0.241379	51	0.22549	aa_98H	0.66
HLA-A	29	0.568966	51	0.5	aa_100V	0.706
HLA-A	29	0.241379	51	0.264706	aa_100E	0.944
HLA-A	29	0.189655	51	0.235294	aa_100A	0.613
HLA-A	29	0.568966	51	0.5	aa_101D	0.706
HLA-A	29	0.413793	51	0.470588	aa_101N	0.81
HLA-A	29	0.0172414	51	0.0294118	aa_101S	0.688
HLA-A	29	0.793103	51	0.764706	aa_103G	0.926
HLA-A	29	0.206897	51	0.235294	aa_103R	0.926
HLA-A	29	0.206897	51	0.235294	aa_104I	0.926
HLA-A	29	0.793103	51	0.764706	aa_104T	0.926
HLA-A	29	0.206897	51	0.235294	aa_105A	0.926
HLA-A	29	0.793103	51	0.764706	aa_105L	0.926
HLA-A	29	0.206897	51	0.235294	aa_106L	0.926
HLA-A	29	0.793103	51	0.764706	aa_106R	0.926
HLA-A	29	0.793103	51	0.764706	aa_107G	0.926
HLA-A	29	0.206897	51	0.235294	aa_107R	0.926
HLA-A	29	0.206897	51	0.245098	aa_114D	0.646
HLA-A	29	0.793103	51	0.754902	aa_114A	0.646
HLA-A	29	0.551724	51	0.539216	aa_119I	0.684
HLA-A	29	0.241379	51	0.245098	aa_119V	0.522
HLA-A	29	0.206897	51	0.215686	aa_119L	0.883
HLA-A	29	0.37931	51	0.333333	aa_121M	0.405
HLA-A	29	0.310345	51	0.294118	aa_121R	0.797
HLA-A	29	0.310345	51	0.372549	aa_121I	0.599
HLA-A	29	0.810345	51	0.794118	aa_123Y	0.971
HLA-A	29	0.189655	51	0.205882	aa_123F	0.971
HLA-A	29	0.258621	51	0.284314	aa_129P	0.85
HLA-A	29	0.741379	51	0.715686	aa_129S	0.85
HLA-A	29	0.741379	51	0.745098	aa_131G	0.618
HLA-A	29	0.258621	51	0.254902	aa_131W	0.618
HLA-A	29	0.982759	51	0.970588	aa_133F	0.688
HLA-A	29	0.0172414	51	0.0294118	aa_133L	0.688
HLA-A	29	0.0517241	51	0.0392157	aa_138E	0.537
HLA-A	29	0.327586	51	0.401961	aa_138R	0.552
HLA-A	29	0.482759	51	0.470588	aa_138H	0.936
HLA-A	29	0.137931	51	0.0882353	aa_138Q	0.452
HLA-A	29	0.465517	51	0.5	aa_140D	0.793
HLA-A	29	0.482759	51	0.460784	aa_140Y	0.98
HLA-A	29	0.0517241	51	0.0392157	aa_140H	0.537
HLA-A	29	0.482759	51	0.490196	aa_151K	0.81
HLA-A	29	0.517241	51	0.509804	aa_151N	0.81
HLA-A	29	0.706897	51	0.715686	aa_166I	0.75
HLA-A	29	0.293103	51	0.284314	aa_166T	0.75
HLA-A	29	0.275862	51	0.205882	aa_168Q	0.32
HLA-A	29	0.724138	51	0.794118	aa_168K	0.32
HLA-A	29	0.293103	51	0.284314	aa_169H	0.75
HLA-A	29	0.706897	51	0.715686	aa_169R	0.75
HLA-A	29	0.982759	51	0.960784	aa_173A	0.455
HLA-A	29	0.0172414	51	0.0392157	aa_173T	0.455
HLA-A	29	0.103448	51	0.156863	aa_174V	0.411
HLA-A	29	0.896552	51	0.843137	aa_174A	0.411
HLA-A	29	0.741379	51	0.833333	aa_175H	0.179
HLA-A	29	0.258621	51	0.166667	aa_175R	0.179
HLA-A	29	0.189655	51	0.205882	aa_176A	0.874
HLA-A	29	0.0689655	51	0.166667	aa_176E	0.124
HLA-A	29	0.0344828	51	0.0294118	aa_176R	0.696
HLA-A	29	0.0172414	51	0.00980392	aa_176W	0.611
HLA-A	29	0.689655	51	0.588235	aa_176V	0.3192
HLA-A	29	0.103448	51	0.156863	aa_180R	0.411
HLA-A	29	0.551724	51	0.529412	aa_180L	0.892
HLA-A	29	0.0689655	51	0.0882353	aa_180W	0.852
HLA-A	29	0.275862	51	0.22549	aa_180Q	0.365
HLA-A	29	0.103448	51	0.156863	aa_182V	0.411
HLA-A	29	0.896552	51	0.843137	aa_182A	0.411
HLA-A	29	0.931034	51	0.872549	aa_185E	0.325
HLA-A	29	0.0689655	51	0.127451	aa_185D	0.325
HLA-A	29	0.206897	51	0.245098	aa_187R	0.646
HLA-A	29	0.793103	51	0.754902	aa_187T	0.646
HLA-A	29	0.706897	51	0.637255	aa_190E	0.576
HLA-A	29	0.293103	51	0.362745	aa_190D	0.576
HLA-A	29	0.706897	51	0.637255	aa_191W	0.576
HLA-A	29	0.293103	51	0.362745	aa_191G	0.576
HLA-A	29	0.0517241	51	0.00980392	aa_195H	0.11
HLA-A	29	0.948276	51	0.990196	aa_195Y	0.11
HLA-A	29	0.551724	51	0.627451	aa_208P	0.685
HLA-A	29	0.448276	51	0.372549	aa_208A	0.685
HLA-A	29	0.0172414	51	0	aa_210R	0.33
HLA-A	29	0.982759	51	0.980392	aa_210K	0.754
HLA-A	29	0	51	0.0196078	aa_210del	0.289
HLA-A	29	0	51	0.0196078	aa_211del	0.289
HLA-A	29	1	51	0.980392	aa_211T	0.289
HLA-A	29	0	51	0.0196078	aa_212del	0.289
HLA-A	29	1	51	0.980392	aa_212H	0.289
HLA-A	29	1	51	0.980392	aa_213M	0.289
HLA-A	29	0	51	0.0196078	aa_213del	0.289
HLA-A	29	1	51	0.980392	aa_214T	0.289
HLA-A	29	0	51	0.0196078	aa_214del	0.289
HLA-A	29	0	51	0.0196078	aa_215del	0.289
HLA-A	29	1	51	0.980392	aa_215H	0.289
HLA-A	29	0	51	0.0196078	aa_216del	0.289
HLA-A	29	1	51	0.980392	aa_216H	0.289
HLA-A	29	0.5	51	0.578431	aa_217P	0.691
HLA-A	29	0.5	51	0.401961	aa_217A	0.527
HLA-A	29	0	51	0.0196078	aa_217del	0.289
HLA-A	29	0.5	51	0.401961	aa_218V	0.527
HLA-A	29	0.5	51	0.578431	aa_218I	0.691
HLA-A	29	0	51	0.0196078	aa_218del	0.289
HLA-A	29	1	51	0.980392	aa_219S	0.289
HLA-A	29	0	51	0.0196078	aa_219del	0.289
HLA-A	29	0	51	0.0196078	aa_220del	0.289
HLA-A	29	1	51	0.980392	aa_220D	0.289
HLA-A	29	1	51	0.980392	aa_221H	0.289
HLA-A	29	0	51	0.0196078	aa_221del	0.289
HLA-A	29	0	51	0.0196078	aa_222del	0.289
HLA-A	29	1	51	0.980392	aa_222E	0.289
HLA-A	29	1	51	0.980392	aa_223A	0.289
HLA-A	29	0	51	0.0196078	aa_223del	0.289
HLA-A	29	1	51	0.980392	aa_224T	0.289
HLA-A	29	0	51	0.0196078	aa_224del	0.289
HLA-A	29	0	51	0.0196078	aa_225del	0.289
HLA-A	29	1	51	0.980392	aa_225L	0.289
HLA-A	29	0	51	0.0196078	aa_226del	0.289
HLA-A	29	1	51	0.980392	aa_226R	0.289
HLA-A	29	0	51	0.0196078	aa_227del	0.289
HLA-A	29	1	51	0.980392	aa_227C	0.289
HLA-A	29	1	51	0.980392	aa_228W	0.289
HLA-A	29	0	51	0.0196078	aa_228del	0.289
HLA-A	29	0	51	0.0196078	aa_229del	0.289
HLA-A	29	1	51	0.980392	aa_229A	0.289
HLA-A	29	0	51	0.0196078	aa_230del	0.289
HLA-A	29	1	51	0.980392	aa_230L	0.289
HLA-A	29	0.5	51	0.578431	aa_231G	0.691
HLA-A	29	0	51	0.0196078	aa_231del	0.289
HLA-A	29	0.5	51	0.401961	aa_231S	0.527
HLA-A	29	1	51	0.980392	aa_232F	0.289
HLA-A	29	0	51	0.0196078	aa_232del	0.289
HLA-A	29	0	51	0.0196078	aa_233del	0.289
HLA-A	29	1	51	0.980392	aa_233Y	0.289
HLA-A	29	0	51	0.0196078	aa_234del	0.289
HLA-A	29	1	51	0.980392	aa_234P	0.289
HLA-A	29	1	51	0.980392	aa_235A	0.289
HLA-A	29	0	51	0.0196078	aa_235del	0.289
HLA-A	29	1	51	0.980392	aa_236E	0.289
HLA-A	29	0	51	0.0196078	aa_236del	0.289
HLA-A	29	0	51	0.0196078	aa_237del	0.289
HLA-A	29	1	51	0.980392	aa_237I	0.289
HLA-A	29	0	51	0.0196078	aa_238del	0.289
HLA-A	29	1	51	0.980392	aa_238T	0.289
HLA-A	29	1	51	0.980392	aa_239L	0.289
HLA-A	29	0	51	0.0196078	aa_239del	0.289
HLA-A	29	1	51	0.980392	aa_240T	0.289
HLA-A	29	0	51	0.0196078	aa_240del	0.289
HLA-A	29	1	51	0.980392	aa_241W	0.289
HLA-A	29	0	51	0.0196078	aa_241del	0.289
HLA-A	29	0	51	0.0196078	aa_242del	0.289
HLA-A	29	1	51	0.980392	aa_242Q	0.289
HLA-A	29	0	51	0.0196078	aa_243del	0.289
HLA-A	29	1	51	0.980392	aa_243R	0.289
HLA-A	29	0	51	0.0196078	aa_244del	0.289
HLA-A	29	1	51	0.980392	aa_244D	0.289
HLA-A	29	0	51	0.0196078	aa_245del	0.289
HLA-A	29	1	51	0.980392	aa_245G	0.289
HLA-A	29	0	51	0.0196078	aa_246del	0.289
HLA-A	29	1	51	0.980392	aa_246E	0.289
HLA-A	29	0	51	0.0196078	aa_247del	0.289
HLA-A	29	1	51	0.980392	aa_247D	0.289
HLA-A	29	0	51	0.0196078	aa_248del	0.289
HLA-A	29	1	51	0.980392	aa_248Q	0.289
HLA-A	29	0	51	0.0196078	aa_249del	0.289
HLA-A	29	1	51	0.980392	aa_249T	0.289
HLA-A	29	1	51	0.980392	aa_253E	0.289
HLA-A	29	0	51	0.0196078	aa_253del	0.289
HLA-A	29	1	51	0.980392	aa_254L	0.289
HLA-A	29	0	51	0.0196078	aa_254del	0.289
HLA-A	29	0	51	0.0196078	aa_255del	0.289
HLA-A	29	1	51	0.980392	aa_255V	0.289
HLA-A	29	1	51	0.980392	aa_256E	0.289
HLA-A	29	0	51	0.0196078	aa_256del	0.289
HLA-A	29	1	51	0.980392	aa_257T	0.289
HLA-A	29	0	51	0.0196078	aa_257del	0.289
HLA-A	29	1	51	0.980392	aa_258R	0.289
HLA-A	29	0	51	0.0196078	aa_258del	0.289
HLA-A	29	1	51	0.980392	aa_259P	0.289
HLA-A	29	0	51	0.0196078	aa_259del	0.289
HLA-A	29	0	51	0.0196078	aa_260del	0.289
HLA-A	29	1	51	0.980392	aa_260A	0.289
HLA-A	29	1	51	0.980392	aa_261G	0.289
HLA-A	29	0	51	0.0196078	aa_261del	0.289
HLA-A	29	0	51	0.0196078	aa_262del	0.289
HLA-A	29	1	51	0.980392	aa_262D	0.289
HLA-A	29	0	51	0.0196078	aa_263del	0.289
HLA-A	29	1	51	0.980392	aa_263G	0.289
HLA-A	29	0	51	0.0196078	aa_264del	0.289
HLA-A	29	1	51	0.980392	aa_264T	0.289
HLA-A	29	1	51	0.980392	aa_265F	0.289
HLA-A	29	0	51	0.0196078	aa_265del	0.289
HLA-A	29	0	51	0.0196078	aa_266del	0.289
HLA-A	29	1	51	0.980392	aa_266Q	0.289
HLA-A	29	1	51	0.980392	aa_267K	0.289
HLA-A	29	0	51	0.0196078	aa_267del	0.289
HLA-A	29	0	51	0.0196078	aa_268del	0.289
HLA-A	29	1	51	0.980392	aa_268W	0.289
HLA-A	29	0	51	0.0196078	aa_269del	0.289
HLA-A	29	0.965517	51	0.931373	aa_269A	0.586
HLA-A	29	0.0344828	51	0.0490196	aa_269V	0.932
HLA-A	29	0.793103	51	0.862745	aa_270A	0.338
HLA-A	29	0.206897	51	0.117647	aa_270S	0.187
HLA-A	29	0	51	0.0196078	aa_270del	0.289
HLA-A	29	1	51	0.980392	aa_271V	0.289
HLA-A	29	0	51	0.0196078	aa_271del	0.289
HLA-A	29	1	51	0.980392	aa_272V	0.289
HLA-A	29	0	51	0.0196078	aa_272del	0.289
HLA-A	29	1	51	0.980392	aa_273V	0.289
HLA-A	29	0	51	0.0196078	aa_273del	0.289
HLA-A	29	1	51	0.980392	aa_274P	0.289
HLA-A	29	0	51	0.0196078	aa_274del	0.289
HLA-A	29	1	51	0.980392	aa_275S	0.289
HLA-A	29	0	51	0.0196078	aa_275del	0.289
HLA-A	29	1	51	0.980392	aa_276G	0.289
HLA-A	29	0	51	0.0196078	aa_276del	0.289
HLA-A	29	0.5	51	0.411765	aa_277Q	0.608
HLA-A	29	0	51	0.0196078	aa_277del	0.289
HLA-A	29	0.5	51	0.568627	aa_277E	0.776
HLA-A	29	1	51	0.980392	aa_278E	0.289
HLA-A	29	0	51	0.0196078	aa_278del	0.289
HLA-A	29	0	51	0.0196078	aa_279del	0.289
HLA-A	29	1	51	0.980392	aa_279Q	0.289
HLA-A	29	0	51	0.0196078	aa_280del	0.289
HLA-A	29	1	51	0.980392	aa_280R	0.289
HLA-A	29	1	51	0.980392	aa_282T	0.289
HLA-A	29	0	51	0.0196078	aa_282D	0.289
HLA-A	29	1	51	0.980392	aa_283C	0.289
HLA-A	29	0	51	0.0196078	aa_283del	0.289
HLA-A	29	0	51	0.0196078	aa_284del	0.289
HLA-A	29	1	51	0.980392	aa_284H	0.289
HLA-A	29	0	51	0.0196078	aa_285del	0.289
HLA-A	29	1	51	0.980392	aa_285V	0.289
HLA-A	29	1	51	0.980392	aa_286Q	0.289
HLA-A	29	0	51	0.0196078	aa_286del	0.289
HLA-A	29	1	51	0.980392	aa_287H	0.289
HLA-A	29	0	51	0.0196078	aa_287del	0.289
HLA-A	29	1	51	0.980392	aa_288E	0.289
HLA-A	29	0	51	0.0196078	aa_288del	0.289
HLA-A	29	0	51	0.0196078	aa_289del	0.289
HLA-A	29	1	51	0.980392	aa_289G	0.289
HLA-A	29	1	51	0.980392	aa_290L	0.289
HLA-A	29	0	51	0.0196078	aa_290del	0.289
HLA-A	29	0	51	0.0196078	aa_292P	0.289
HLA-A	29	1	51	0.980392	aa_292K	0.289
HLA-A	29	0	51	0.0196078	aa_294H	0.289
HLA-A	29	1	51	0.980392	aa_294L	0.289
HLA-A	29	0	51	0.0196078	aa_295L	0.289
HLA-A	29	1	51	0.980392	aa_295T	0.289
HLA-A	29	0	51	0.0196078	aa_296X	0.289
HLA-A	29	1	51	0.980392	aa_296L	0.289
HLA-A	29	1	51	0.980392	aa_297R	0.289
HLA-A	29	0	51	0.0196078	aa_297del	0.289
HLA-A	29	1	51	0.980392	aa_298W	0.289
HLA-A	29	0	51	0.0196078	aa_298del	0.289
HLA-A	29	0	51	0.0196078	aa_299del	0.289
HLA-A	29	1	51	0.980392	aa_299E	0.289
HLA-A	29	0	51	0.0196078	aa_300del	0.289
HLA-A	29	0.310345	51	0.372549	aa_300L	0.596
HLA-A	29	0.689655	51	0.607843	aa_300P	0.429
HLA-A	29	0	51	0.0196078	aa_301del	0.289
HLA-A	29	1	51	0.980392	aa_301S	0.289
HLA-A	29	1	51	0.980392	aa_302S	0.289
HLA-A	29	0	51	0.0196078	aa_302del	0.289
HLA-A	29	1	51	0.980392	aa_303Q	0.289
HLA-A	29	0	51	0.0196078	aa_303del	0.289
HLA-A	29	0	51	0.0196078	aa_304del	0.289
HLA-A	29	1	51	0.980392	aa_304P	0.289
HLA-A	29	1	51	0.980392	aa_305T	0.289
HLA-A	29	0	51	0.0196078	aa_305del	0.289
HLA-A	29	0.810345	51	0.77451	aa_306I	0.814
HLA-A	29	0	51	0.0196078	aa_306del	0.289
HLA-A	29	0.189655	51	0.205882	aa_306V	0.942
HLA-A	29	0.0172414	51	0.0294118	aa_307H	0.7
HLA-A	29	0	51	0.0196078	aa_307del	0.289
HLA-A	29	0.982759	51	0.95098	aa_307P	0.347
HLA-A	29	0	51	0.0196078	aa_308del	0.289
HLA-A	29	1	51	0.980392	aa_308I	0.289
HLA-A	29	0	51	0.0196078	aa_309del	0.289
HLA-A	29	1	51	0.980392	aa_309V	0.289
HLA-A	29	0	51	0.0196078	aa_310del	0.289
HLA-A	29	1	51	0.980392	aa_310G	0.289
HLA-A	29	0	51	0.0196078	aa_311del	0.289
HLA-A	29	1	51	0.980392	aa_311I	0.289
HLA-A	29	0	51	0.0196078	aa_312del	0.289
HLA-A	29	1	51	0.980392	aa_312I	0.289
HLA-A	29	1	51	0.980392	aa_313A	0.289
HLA-A	29	0	51	0.0196078	aa_313del	0.289
HLA-A	29	1	51	0.980392	aa_314G	0.289
HLA-A	29	0	51	0.0196078	aa_314del	0.289
HLA-A	29	1	51	0.980392	aa_315L	0.289
HLA-A	29	0	51	0.0196078	aa_315del	0.289
HLA-A	29	1	51	0.980392	aa_316V	0.289
HLA-A	29	0	51	0.0196078	aa_316del	0.289
HLA-A	29	0	51	0.0196078	aa_317del	0.289
HLA-A	29	1	51	0.980392	aa_317L	0.289
HLA-A	29	0.5	51	0.401961	aa_318F	0.527
HLA-A	29	0.5	51	0.578431	aa_318L	0.691
HLA-A	29	0	51	0.0196078	aa_318del	0.289
HLA-A	29	0	51	0.0196078	aa_319del	0.289
HLA-A	29	1	51	0.980392	aa_319G	0.289
HLA-A	29	1	51	0.980392	aa_320A	0.289
HLA-A	29	0	51	0.0196078	aa_320del	0.289
HLA-A	29	0	51	0.0196078	aa_321del	0.289
HLA-A	29	0.982759	51	0.95098	aa_321V	0.339
HLA-A	29	0.0172414	51	0.0294118	aa_321M	0.688
HLA-A	29	0.189655	51	0.0882353	aa_322F	0.107
HLA-A	29	0	51	0.0196078	aa_322del	0.289
HLA-A	29	0.810345	51	0.892157	aa_322I	0.228
HLA-A	29	0.206897	51	0.117647	aa_323A	0.187
HLA-A	29	0	51	0.0196078	aa_323del	0.289
HLA-A	29	0.793103	51	0.862745	aa_323T	0.338
HLA-A	29	1	51	0.980392	aa_324G	0.289
HLA-A	29	0	51	0.0196078	aa_324del	0.289
HLA-A	29	0	51	0.0196078	aa_325del	0.289
HLA-A	29	1	51	0.980392	aa_325A	0.289
HLA-A	29	0	51	0.0196078	aa_326del	0.289
HLA-A	29	1	51	0.980392	aa_326V	0.289
HLA-A	29	1	51	0.980392	aa_327V	0.289
HLA-A	29	0	51	0.0196078	aa_327del	0.289
HLA-A	29	0	51	0.0196078	aa_328del	0.289
HLA-A	29	1	51	0.980392	aa_328A	0.289
HLA-A	29	1	51	0.980392	aa_329A	0.289
HLA-A	29	0	51	0.0196078	aa_329del	0.289
HLA-A	29	1	51	0.980392	aa_330V	0.289
HLA-A	29	0	51	0.0196078	aa_330del	0.289
HLA-A	29	0.827586	51	0.892157	aa_331M	0.351
HLA-A	29	0.172414	51	0.0882353	aa_331R	0.182
HLA-A	29	0	51	0.0196078	aa_331del	0.289
HLA-A	29	0	51	0.0196078	aa_332del	0.289
HLA-A	29	1	51	0.980392	aa_332W	0.289
HLA-A	29	0	51	0.0196078	aa_333del	0.289
HLA-A	29	1	51	0.980392	aa_333R	0.289
HLA-A	29	0	51	0.0196078	aa_334del	0.289
HLA-A	29	1	51	0.980392	aa_334R	0.289
HLA-A	29	0.206897	51	0.205882	aa_335N	0.749
HLA-A	29	0	51	0.0196078	aa_335del	0.289
HLA-A	29	0.793103	51	0.77451	aa_335K	0.981
HLA-A	29	1	51	0.980392	aa_336S	0.289
HLA-A	29	0	51	0.0196078	aa_336del	0.289
HLA-A	29	1	51	0.980392	aa_337S	0.289
HLA-A	29	0	51	0.0196078	aa_337del	0.289
HLA-A	29	1	51	0.980392	aa_338D	0.289
HLA-A	29	0	51	0.0196078	aa_338del	0.289
HLA-A	29	1	51	0.980392	aa_339R	0.289
HLA-A	29	0	51	0.0196078	aa_339del	0.289
HLA-A	29	1	51	0.980392	aa_340K	0.289
HLA-A	29	0	51	0.0196078	aa_340del	0.289
HLA-A	29	1	51	0.980392	aa_341G	0.289
HLA-A	29	0	51	0.0196078	aa_341del	0.289
HLA-A	29	1	51	0.980392	aa_342G	0.289
HLA-A	29	0	51	0.0196078	aa_342del	0.289
HLA-A	29	1	51	0.980392	aa_343S	0.289
HLA-A	29	0	51	0.0196078	aa_343del	0.289
HLA-A	29	0	51	0.0196078	aa_344del	0.289
HLA-A	29	1	51	0.980392	aa_344Y	0.289
HLA-A	29	0.689655	51	0.607843	aa_345S	0.429
HLA-A	29	0	51	0.0196078	aa_345del	0.289
HLA-A	29	0.310345	51	0.372549	aa_345T	0.596
HLA-A	29	1	51	0.980392	aa_346Q	0.289
HLA-A	29	0	51	0.0196078	aa_346del	0.289
HLA-A	29	1	51	0.980392	aa_347A	0.289
HLA-A	29	0	51	0.0196078	aa_347del	0.289
HLA-A	29	1	51	0.980392	aa_348A	0.289
HLA-A	29	0	51	0.0196078	aa_348del	0.289
HLA-A	29	0	51	0.0196078	aa_349del	0.289
HLA-A	29	1	51	0.980392	aa_349S	0.289
HLA-A	29	1	51	0.980392	aa_350S	0.289
HLA-A	29	0	51	0.0196078	aa_350del	0.289
HLA-A	29	0	51	0.0196078	aa_351del	0.289
HLA-A	29	1	51	0.980392	aa_351D	0.289
HLA-A	29	1	51	0.980392	aa_352S	0.289
HLA-A	29	0	51	0.0196078	aa_352del	0.289
HLA-A	29	1	51	0.980392	aa_353A	0.289
HLA-A	29	0	51	0.0196078	aa_353del	0.289
HLA-A	29	1	51	0.980392	aa_354Q	0.289
HLA-A	29	0	51	0.0196078	aa_354del	0.289
HLA-A	29	1	51	0.980392	aa_355G	0.289
HLA-A	29	0	51	0.0196078	aa_355del	0.289
HLA-A	29	0	51	0.0196078	aa_356del	0.289
HLA-A	29	1	51	0.980392	aa_356S	0.289
HLA-A	29	1	51	0.980392	aa_357D	0.289
HLA-A	29	0	51	0.0196078	aa_357del	0.289
HLA-A	29	0	51	0.0196078	aa_358del	0.289
HLA-A	29	0.189655	51	0.117647	aa_358M	0.263
HLA-A	29	0.810345	51	0.862745	aa_358V	0.448
HLA-A	29	0	51	0.0196078	aa_359del	0.289
HLA-A	29	1	51	0.980392	aa_359S	0.289
HLA-A	29	0	51	0.0196078	aa_360del	0.289
HLA-A	29	1	51	0.980392	aa_360L	0.289
HLA-A	29	0	51	0.0196078	aa_361del	0.289
HLA-A	29	1	51	0.980392	aa_361T	0.289
HLA-A	29	0	51	0.0196078	aa_362del	0.289
HLA-A	29	1	51	0.980392	aa_362A	0.289
HLA-A	29	1	51	0.980392	aa_363C	0.289
HLA-A	29	0	51	0.0196078	aa_363del	0.289
HLA-A	29	0	51	0.0196078	aa_364del	0.289
HLA-A	29	1	51	0.980392	aa_364K	0.289
HLA-A	29	1	51	0.980392	aa_365V	0.289
HLA-A	29	0	51	0.0196078	aa_365del	0.289
HLA-A	29	1	51	0.980392	aa_366X	0.289
HLA-A	29	0	51	0.0196078	aa_366del	0.289
HLA-B	29	0.706897	51	0.705882	aa_2R	0.749
HLA-B	29	0.293103	51	0.294118	aa_2L	0.749
HLA-B	29	0.293103	51	0.294118	aa_4M	0.749
HLA-B	29	0.706897	51	0.705882	aa_4T	0.749
HLA-B	29	0.672414	51	0.745098	aa_9V	0.2429
HLA-B	29	0.327586	51	0.254902	aa_9L	0.2429
HLA-B	29	0.586207	51	0.54902	aa_14W	0.52
HLA-B	29	0.413793	51	0.45098	aa_14S	0.52
HLA-B	29	0.344828	51	0.382353	aa_15A	0.473
HLA-B	29	0.655172	51	0.617647	aa_15G	0.473
HLA-B	29	0.413793	51	0.460784	aa_17L	0.488
HLA-B	29	0.586207	51	0.539216	aa_17V	0.488
HLA-B	29	0.206897	51	0.205882	aa_33H	0.91
HLA-B	29	0.689655	51	0.705882	aa_33Y	0.734
HLA-B	29	0.103448	51	0.0882353	aa_33D	0.731
HLA-B	29	0.241379	51	0.303922	aa_35S	0.221
HLA-B	29	0.758621	51	0.696078	aa_35A	0.221
HLA-B	29	0.310345	51	0.323529	aa_36V	0.621
HLA-B	29	0.689655	51	0.676471	aa_36M	0.621
HLA-B	29	0.327586	51	0.343137	aa_48A	0.937
HLA-B	29	0.310345	51	0.245098	aa_48T	0.237
HLA-B	29	0.362069	51	0.411765	aa_48S	0.404
HLA-B	29	0.913793	51	0.95098	aa_54D	0.38
HLA-B	29	0.0862069	51	0.0490196	aa_54G	0.38
HLA-B	29	0.293103	51	0.235294	aa_56L	0.292
HLA-B	29	0.706897	51	0.764706	aa_56Q	0.292
HLA-B	29	0.706897	51	0.784314	aa_65A	0.158
HLA-B	29	0.293103	51	0.215686	aa_65T	0.158
HLA-B	29	0.275862	51	0.205882	aa_69K	0.198
HLA-B	29	0.293103	51	0.352941	aa_69T	0.645
HLA-B	29	0.293103	51	0.352941	aa_69E	0.325
HLA-B	29	0.137931	51	0.0882353	aa_69M	0.441
HLA-B	29	0.137931	51	0.0882353	aa_70A	0.441
HLA-B	29	0.862069	51	0.911765	aa_70E	0.441
HLA-B	29	0.931034	51	0.970588	aa_86R	0.455
HLA-B	29	0.0689655	51	0.0294118	aa_86G	0.455
HLA-B	29	0.534483	51	0.578431	aa_87N	0.696
HLA-B	29	0.465517	51	0.421569	aa_87E	0.696
HLA-B	29	0.896552	51	0.95098	aa_89Q	0.374
HLA-B	29	0.103448	51	0.0490196	aa_89R	0.374
HLA-B	29	0.103448	51	0.0490196	aa_90N	0.374
HLA-B	29	0.896552	51	0.95098	aa_90I	0.374
HLA-B	29	0.0517241	51	0.107843	aa_91Y	0.1115
HLA-B	29	0.431034	51	0.392157	aa_91S	0.615
HLA-B	29	0.12069	51	0.117647	aa_91C	0.781
HLA-B	29	0.293103	51	0.333333	aa_91F	0.793
HLA-B	29	0.103448	51	0.0490196	aa_91M	0.374
HLA-B	29	0.172414	51	0.186275	aa_93A	0.463
HLA-B	29	0.827586	51	0.813725	aa_93T	0.463
HLA-B	29	0.827586	51	0.813725	aa_94N	0.463
HLA-B	29	0.0172414	51	0.0294118	aa_94K	0.594
HLA-B	29	0.0517241	51	0.107843	aa_94Q	0.1115
HLA-B	29	0.103448	51	0.0490196	aa_94S	0.374
HLA-B	29	0.827586	51	0.813725	aa_95T	0.463
HLA-B	29	0.172414	51	0.186275	aa_95A	0.463
HLA-B	29	0.275862	51	0.264706	aa_98D	0.958
HLA-B	29	0.724138	51	0.735294	aa_98Y	0.958
HLA-B	29	0.586207	51	0.598039	aa_101S	0.916
HLA-B	29	0.396552	51	0.343137	aa_101N	0.531
HLA-B	29	0.0172414	51	0.0588235	aa_101D	0.242
HLA-B	29	0.586207	51	0.607843	aa_104N	0.833
HLA-B	29	0.206897	51	0.215686	aa_104I	0.79
HLA-B	29	0.206897	51	0.176471	aa_104T	0.566
HLA-B	29	0.603448	51	0.666667	aa_105L	0.462
HLA-B	29	0.396552	51	0.333333	aa_105A	0.462
HLA-B	29	0.413793	51	0.392157	aa_106L	0.833
HLA-B	29	0.586207	51	0.607843	aa_106R	0.833
HLA-B	29	0.413793	51	0.392157	aa_107R	0.833
HLA-B	29	0.586207	51	0.607843	aa_107G	0.833
HLA-B	29	0.62069	51	0.656863	aa_118T	0.595
HLA-B	29	0.37931	51	0.343137	aa_118I	0.595
HLA-B	29	0.172414	51	0.176471	aa_119W	0.982
HLA-B	29	0.448276	51	0.441176	aa_119L	0.914
HLA-B	29	0.37931	51	0.382353	aa_119I	0.926
HLA-B	29	0.103448	51	0.117647	aa_121T	0.862
HLA-B	29	0.189655	51	0.186275	aa_121S	0.602
HLA-B	29	0.0172414	51	0.0294118	aa_121N	0.594
HLA-B	29	0.0689655	51	0.0392157	aa_121W	0.345
HLA-B	29	0.0517241	51	0.0294118	aa_121V	0.771
HLA-B	29	0.568966	51	0.598039	aa_121R	0.875
HLA-B	29	1	51	0.95098	aa_123Y	0.1482
HLA-B	29	0	51	0.0392157	aa_123S	0.166
HLA-B	29	0	51	0.00980392	aa_123F	0.679
HLA-B	29	0.758621	51	0.735294	aa_127V	0.988
HLA-B	29	0.241379	51	0.264706	aa_127L	0.988
HLA-B	29	0.0172414	51	0.0196078	aa_133F	0.992
HLA-B	29	0.982759	51	0.980392	aa_133L	0.992
HLA-B	29	0.362069	51	0.294118	aa_137Y	0.267
HLA-B	29	0.637931	51	0.705882	aa_137H	0.267
HLA-B	29	0.0517241	51	0.0490196	aa_138H	0.938
HLA-B	29	0.465517	51	0.460784	aa_138N	0.777
HLA-B	29	0.482759	51	0.490196	aa_138D	0.813
HLA-B	29	0.189655	51	0.166667	aa_140D	0.757
HLA-B	29	0.0862069	51	0.0686275	aa_140L	0.566
HLA-B	29	0.12069	51	0.176471	aa_140F	0.593
HLA-B	29	0.344828	51	0.362745	aa_140Y	0.652
HLA-B	29	0.258621	51	0.22549	aa_140S	0.701
HLA-B	29	0.793103	51	0.77451	aa_155S	0.469
HLA-B	29	0.206897	51	0.22549	aa_155R	0.469
HLA-B	29	0.982759	51	0.970588	aa_167T	0.2257
HLA-B	29	0.0172414	51	0.0294118	aa_167S	0.2257
HLA-B	29	0.0172414	51	0.00980392	aa_169L	0.672
HLA-B	29	0.982759	51	0.990196	aa_169R	0.672
HLA-B	29	0.982759	51	0.970588	aa_171W	0.2257
HLA-B	29	0.0172414	51	0.0294118	aa_171L	0.2257
HLA-B	29	0.310345	51	0.323529	aa_176E	0.84
HLA-B	29	0.689655	51	0.676471	aa_176V	0.84
HLA-B	29	0.0344828	51	0.0294118	aa_180W	0.742
HLA-B	29	0.0862069	51	0.0980392	aa_180R	0.536
HLA-B	29	0.189655	51	0.215686	aa_180D	0.89
HLA-B	29	0.689655	51	0.656863	aa_180L	0.707
HLA-B	29	0.0344828	51	0.0490196	aa_182T	0.882
HLA-B	29	0.965517	51	0.95098	aa_182A	0.882
HLA-B	29	1	51	0.990196	aa_186G	0.679
HLA-B	29	0	51	0.00980392	aa_186D	0.679
HLA-B	29	0.293103	51	0.284314	aa_187T	0.753
HLA-B	29	0.568966	51	0.558824	aa_187L	0.712
HLA-B	29	0.137931	51	0.156863	aa_187E	0.3408
HLA-B	29	0.189655	51	0.137255	aa_191S	0.2823
HLA-B	29	0.810345	51	0.862745	aa_191W	0.2823
HLA-B	29	0.775862	51	0.823529	aa_195Y	0.363
HLA-B	29	0.224138	51	0.176471	aa_195H	0.363
HLA-B	29	0.172414	51	0.22549	aa_201D	0.2034
HLA-B	29	0.827586	51	0.77451	aa_201E	0.2034
HLA-B	29	0.931034	51	0.882353	aa_202T	0.0543
HLA-B	29	0.0689655	51	0.117647	aa_202K	0.0543
HLA-B	29	0.827586	51	0.77451	aa_204Q	0.2034
HLA-B	29	0.172414	51	0.22549	aa_204E	0.2034
HLA-B	29	0.206897	51	0.284314	aa_218V	0.473
HLA-B	29	0.793103	51	0.715686	aa_218I	0.473
HLA-B	29	0.172414	51	0.107843	aa_223V	0.1872
HLA-B	29	0.827586	51	0.892157	aa_223A	0.1872
HLA-B	29	0.982759	51	1	aa_269A	0.693
HLA-B	29	0.0172414	51	0	aa_269T	0.693
HLA-B	29	0.551724	51	0.480392	aa_306V	0.642
HLA-B	29	0.448276	51	0.519608	aa_306I	0.642
HLA-B	29	0.431034	51	0.509804	aa_329T	0.597
HLA-B	29	0.568966	51	0.490196	aa_329A	0.597
HLA-B	29	0.465517	51	0.401961	aa_349C	0.832
HLA-B	29	0.534483	51	0.598039	aa_349S	0.832
HLA-C	29	0	51	0.0196078	aa_7Q	0.287
HLA-C	29	1	51	0.980392	aa_7R	0.287
HLA-C	29	0.724138	51	0.72549	aa_8T	0.807
HLA-C	29	0.275862	51	0.27451	aa_8A	0.807
HLA-C	29	0.431034	51	0.362745	aa_10L	0.542
HLA-C	29	0.568966	51	0.637255	aa_10I	0.542
HLA-C	29	0.724138	51	0.745098	aa_16A	0.987
HLA-C	29	0.275862	51	0.254902	aa_16G	0.987
HLA-C	29	0	51	0.0196078	aa_20I	0.287
HLA-C	29	1	51	0.980392	aa_20T	0.287
HLA-C	29	0.827586	51	0.676471	aa_25C	0.1438
HLA-C	29	0.172414	51	0.323529	aa_25G	0.144
HLA-C	29	0	51	0.0196078	aa_30K	0.394
HLA-C	29	1	51	0.980392	aa_30R	0.394
HLA-C	29	0.155172	51	0.22549	aa_33S	0.258
HLA-C	29	0.482759	51	0.421569	aa_33Y	0.204
HLA-C	29	0	51	0.0196078	aa_33F	0.394
HLA-C	29	0.362069	51	0.333333	aa_33D	0.98
HLA-C	29	0.844828	51	0.754902	aa_35A	0.2063
HLA-C	29	0.155172	51	0.245098	aa_35S	0.206
HLA-C	29	0.87931	51	0.794118	aa_38R	0.3
HLA-C	29	0.12069	51	0.205882	aa_38W	0.3
HLA-C	29	0.12069	51	0.0490196	aa_40S	0.106
HLA-C	29	0.87931	51	0.95098	aa_40G	0.106
HLA-C	29	0.224138	51	0.186275	aa_45H	0.53
HLA-C	29	0.775862	51	0.813725	aa_45R	0.53
HLA-C	29	0.637931	51	0.647059	aa_48A	0.835
HLA-C	29	0.362069	51	0.352941	aa_48S	0.835
HLA-C	29	0.844828	51	0.901961	aa_59R	0.357
HLA-C	29	0.155172	51	0.0980392	aa_59Q	0.357
HLA-C	29	0.87931	51	0.794118	aa_73A	0.3
HLA-C	29	0.12069	51	0.205882	aa_73E	0.3
HLA-C	29	0.724138	51	0.813725	aa_90K	0.275
HLA-C	29	0.275862	51	0.186275	aa_90N	0.275
HLA-C	29	0.448276	51	0.382353	aa_97T	0.422
HLA-C	29	0.551724	51	0.617647	aa_97A	0.422
HLA-C	29	0.431034	51	0.480392	aa_101N	0.681
HLA-C	29	0.568966	51	0.519608	aa_101S	0.681
HLA-C	29	0.568966	51	0.519608	aa_104N	0.681
HLA-C	29	0.431034	51	0.480392	aa_104K	0.681
HLA-C	29	0.482759	51	0.539216	aa_114D	0.3618
HLA-C	29	0.517241	51	0.460784	aa_114A	0.3618
HLA-C	29	0.965517	51	0.970588	aa_115G	0.826
HLA-C	29	0.0344828	51	0.0294118	aa_115R	0.826
HLA-C	29	0.913793	51	0.862745	aa_118T	0.51
HLA-C	29	0.0862069	51	0.137255	aa_118I	0.51
HLA-C	29	0.913793	51	0.843137	aa_119L	0.342
HLA-C	29	0	51	0.00980392	aa_119F	0.539
HLA-C	29	0.0862069	51	0.147059	aa_119I	0.41
HLA-C	29	0.241379	51	0.22549	aa_121W	0.894
HLA-C	29	0.758621	51	0.77451	aa_121R	0.894
HLA-C	29	0.810345	51	0.656863	aa_123Y	0.0205
HLA-C	29	0.0344828	51	0.0882353	aa_123S	0.0893
HLA-C	29	0	51	0.0196078	aa_123C	0.394
HLA-C	29	0.155172	51	0.235294	aa_123F	0.21
HLA-C	29	0.0517241	51	0.0980392	aa_127V	0.468
HLA-C	29	0.948276	51	0.901961	aa_127L	0.468
HLA-C	29	0.0344828	51	0.0392157	aa_137H	0.971
HLA-C	29	0.965517	51	0.960784	aa_137Y	0.971
HLA-C	29	0.724138	51	0.666667	aa_138D	0.527
HLA-C	29	0.275862	51	0.333333	aa_138N	0.527
HLA-C	29	0.0517241	51	0.107843	aa_140Y	0.353
HLA-C	29	0.637931	51	0.509804	aa_140S	0.2468
HLA-C	29	0.0172414	51	0.0294118	aa_140L	0.766
HLA-C	29	0.293103	51	0.352941	aa_140F	0.508
HLA-C	29	0.137931	51	0.0980392	aa_162K	0.329
HLA-C	29	0.862069	51	0.901961	aa_162T	0.329
HLA-C	29	1	51	0.980392	aa_167T	0.287
HLA-C	29	0	51	0.0196078	aa_167S	0.287
HLA-C	29	0.275862	51	0.264706	aa_171L	0.898
HLA-C	29	0.724138	51	0.735294	aa_171W	0.898
HLA-C	29	0.655172	51	0.696078	aa_176E	0.939
HLA-C	29	0.327586	51	0.303922	aa_176A	0.914
HLA-C	29	0.0172414	51	0	aa_176T	0.693
HLA-C	29	0.0517241	51	0.0686275	aa_180Q	0.789
HLA-C	29	0	51	0.00980392	aa_180D	0.539
HLA-C	29	0.37931	51	0.392157	aa_180L	0.683
HLA-C	29	0.293103	51	0.343137	aa_180R	0.599
HLA-C	29	0.275862	51	0.186275	aa_180W	0.1346
HLA-C	29	0.827586	51	0.833333	aa_187T	0.732
HLA-C	29	0.12069	51	0.0686275	aa_187E	0.267
HLA-C	29	0.0517241	51	0.0980392	aa_187L	0.468
HLA-C	29	0	51	0.0196078	aa_194G	0.287
HLA-C	29	1	51	0.980392	aa_194R	0.287
HLA-C	29	0.948276	51	0.901961	aa_197E	0.468
HLA-C	29	0.0517241	51	0.0980392	aa_197K	0.468
HLA-C	29	0.0172414	51	0	aa_199R	0.693
HLA-C	29	0.982759	51	1	aa_199G	0.693
HLA-C	29	0.844828	51	0.892157	aa_201E	0.455
HLA-C	29	0.155172	51	0.107843	aa_201K	0.455
HLA-C	29	0.0172414	51	0	aa_207D	0.159
HLA-C	29	0.982759	51	1	aa_207E	0.159
HLA-C	29	0.706897	51	0.735294	aa_208H	0.908
HLA-C	29	0.293103	51	0.245098	aa_208P	0.707
HLA-C	29	0	51	0.0196078	aa_208R	0.287
HLA-C	29	0.948276	51	0.941176	aa_217P	0.964
HLA-C	29	0.0517241	51	0.0588235	aa_217L	0.964
HLA-C	29	0.706897	51	0.754902	aa_218V	0.707
HLA-C	29	0.275862	51	0.245098	aa_218L	0.895
HLA-C	29	0.0172414	51	0	aa_218I	0.159
HLA-C	29	0.12069	51	0.0490196	aa_235T	0.106
HLA-C	29	0.87931	51	0.95098	aa_235A	0.106
HLA-C	29	0.793103	51	0.656863	aa_243R	0.123
HLA-C	29	0.206897	51	0.343137	aa_243W	0.123
HLA-C	29	0	51	0.0196078	aa_272M	0.394
HLA-C	29	1	51	0.980392	aa_272V	0.394
HLA-C	29	0.275862	51	0.264706	aa_277Q	0.898
HLA-C	29	0.724138	51	0.735294	aa_277E	0.898
HLA-C	29	0.724138	51	0.754902	aa_285V	0.895
HLA-C	29	0.275862	51	0.245098	aa_285M	0.895
HLA-C	29	0.275862	51	0.264706	aa_291Q	0.898
HLA-C	29	0.724138	51	0.735294	aa_291P	0.898
HLA-C	29	1	51	0.980392	aa_294L	0.287
HLA-C	29	0	51	0.0196078	aa_294C	0.287
HLA-C	29	0.724138	51	0.754902	aa_297R	0.895
HLA-C	29	0.275862	51	0.245098	aa_297S	0.895
HLA-C	29	0.724138	51	0.666667	aa_299E	0.527
HLA-C	29	0.155172	51	0.0980392	aa_299G	0.357
HLA-C	29	0.12069	51	0.235294	aa_299K	0.149
HLA-C	29	0	51	0.0196078	aa_308N	0.287
HLA-C	29	1	51	0.980392	aa_308I	0.287
HLA-C	29	0	51	0.0196078	aa_309L	0.287
HLA-C	29	0.275862	51	0.245098	aa_309M	0.895
HLA-C	29	0.724138	51	0.735294	aa_309V	0.898
HLA-C	29	1	51	0.980392	aa_313A	0.287
HLA-C	29	0	51	0.0196078	aa_313S	0.287
HLA-C	29	1	51	0.980392	aa_315del	0.287
HLA-C	29	0	51	0.0196078	aa_315P	0.287
HLA-C	29	1	51	0.980392	aa_316del	0.287
HLA-C	29	0	51	0.0196078	aa_316A	0.287
HLA-C	29	0	51	0.0196078	aa_317V	0.287
HLA-C	29	1	51	0.980392	aa_317del	0.287
HLA-C	29	1	51	0.980392	aa_318del	0.287
HLA-C	29	0	51	0.0196078	aa_318L	0.287
HLA-C	29	1	51	0.980392	aa_319del	0.287
HLA-C	29	0	51	0.0196078	aa_319A	0.287
HLA-C	29	0	51	0.0196078	aa_320V	0.287
HLA-C	29	1	51	0.980392	aa_320del	0.287
HLA-C	29	0.724138	51	0.754902	aa_325A	0.895
HLA-C	29	0.275862	51	0.245098	aa_325V	0.895
HLA-C	29	0.87931	51	0.794118	aa_333V	0.3
HLA-C	29	0.12069	51	0.205882	aa_333M	0.3
HLA-C	29	0.655172	51	0.72549	aa_334V	0.326
HLA-C	29	0.344828	51	0.27451	aa_334M	0.326
HLA-C	29	0.275862	51	0.245098	aa_335T	0.895
HLA-C	29	0.724138	51	0.754902	aa_335A	0.895
HLA-C	29	0.275862	51	0.264706	aa_336A	0.898
HLA-C	29	0.724138	51	0.735294	aa_336V	0.898
HLA-C	29	0.275862	51	0.245098	aa_337M	0.895
HLA-C	29	0.724138	51	0.754902	aa_337V	0.895
HLA-C	29	1	51	0.980392	aa_338M	0.287
HLA-C	29	0	51	0.0196078	aa_338I	0.287
HLA-C	29	1	51	0.980392	aa_339C	0.287
HLA-C	29	0	51	0.0196078	aa_339H	0.287
HLA-C	29	0.0172414	51	0	aa_354V	0.233
HLA-C	29	0.982759	51	1	aa_354A	0.233
HLA-C	29	0.275862	51	0.245098	aa_356C	0.895
HLA-C	29	0.724138	51	0.754902	aa_356S	0.895
HLA-C	29	0.724138	51	0.745098	aa_369A	0.988
HLA-C	29	0.275862	51	0.254902	aa_369T	0.988
HLA-DMA	29	0.12069	51	0.137255	aa_166I	0.657
HLA-DMA	29	0.87931	51	0.862745	aa_166V	0.657
HLA-DMA	29	0.0344828	51	0.00980392	aa_181A	0.358
HLA-DMA	29	0.965517	51	0.990196	aa_181G	0.358
HLA-DMA	29	0.0344828	51	0.00980392	aa_210H	0.358
HLA-DMA	29	0.0172414	51	0.0294118	aa_210C	0.4303
HLA-DMA	29	0.948276	51	0.960784	aa_210R	0.999
HLA-DMB	29	0.0344828	51	0.00980392	aa_28A	0.358
HLA-DMB	29	0.965517	51	0.990196	aa_28T	0.358
HLA-DMB	29	0.965517	51	0.990196	aa_49D	0.358
HLA-DMB	29	0.0344828	51	0.00980392	aa_49V	0.358
HLA-DMB	29	0.965517	51	0.990196	aa_71S	0.358
HLA-DMB	29	0.0344828	51	0.00980392	aa_71N	0.358
HLA-DMB	29	0.965517	51	0.941176	aa_162A	0.48
HLA-DMB	29	0.0172414	51	0.0196078	aa_162V	0.95
HLA-DMB	29	0.0172414	51	0.0392157	aa_162E	0.414
HLA-DMB	29	0.741379	51	0.754902	aa_197I	0.853
HLA-DMB	29	0.258621	51	0.245098	aa_197T	0.853
HLA-DOA	29	0.0172414	51	0	aa_105C	0.3
HLA-DOA	29	0.982759	51	1	aa_105R	0.3
HLA-DOA	29	0.0172414	51	0	aa_139L	0.208
HLA-DOA	29	0.982759	51	1	aa_139F	0.208
HLA-DOA	29	0	51	0.00980392	aa_175R	0.39
HLA-DOA	29	1	51	0.990196	aa_175H	0.39
HLA-DOA	29	0	51	0.0196078	aa_231V	0.382
HLA-DOA	29	1	51	0.980392	aa_231G	0.382
HLA-DOB	29	0	51	0.00980392	aa_7A	0.3207
HLA-DOB	29	1	51	0.990196	aa_7P	0.3207
HLA-DOB	29	1	51	0.980392	aa_18R	0.375
HLA-DOB	29	0	51	0.0196078	aa_18Q	0.375
HLA-DOB	29	0.931034	51	0.980392	aa_210V	0.0857
HLA-DOB	29	0.0689655	51	0.0196078	aa_210I	0.0857
HLA-DOB	29	0.0862069	51	0.0784314	aa_234F	0.639
HLA-DOB	29	0.913793	51	0.921569	aa_234L	0.639
HLA-DOB	29	0.0172414	51	0.0980392	aa_244I	0.0745
HLA-DOB	29	0.982759	51	0.901961	aa_244V	0.0745
HLA-DPA1	29	0.0517241	51	0.0686275	aa_42M	0.37
HLA-DPA1	29	0.948276	51	0.931373	aa_42A	0.37
HLA-DPA1	29	0.241379	51	0.27451	aa_62Q	0.671
HLA-DPA1	29	0.758621	51	0.72549	aa_62M	0.671
HLA-DPA1	29	0.241379	51	0.27451	aa_81R	0.671
HLA-DPA1	29	0.758621	51	0.72549	aa_81Q	0.671
HLA-DPA1	29	0	51	0.00980392	aa_89D	0.417
HLA-DPA1	29	1	51	0.990196	aa_89G	0.417
HLA-DPA1	29	0.758621	51	0.72549	aa_114T	0.671
HLA-DPA1	29	0.241379	51	0.27451	aa_114A	0.671
HLA-DPA1	29	0.0172414	51	0.00980392	aa_122M	0.772
HLA-DPA1	29	0.982759	51	0.990196	aa_122V	0.772
HLA-DPA1	29	0.241379	51	0.27451	aa_142R	0.671
HLA-DPA1	29	0.758621	51	0.72549	aa_142K	0.671
HLA-DPA1	29	0.241379	51	0.27451	aa_158P	0.671
HLA-DPA1	29	0.758621	51	0.72549	aa_158L	0.671
HLA-DPA1	29	0.241379	51	0.27451	aa_191V	0.671
HLA-DPA1	29	0.758621	51	0.72549	aa_191F	0.671
HLA-DPA1	29	0.241379	51	0.27451	aa_259P	0.671
HLA-DPA1	29	0.758621	51	0.72549	aa_259T	0.671
HLA-DPB1	29	0.706897	51	0.676471	aa_37L	0.852
HLA-DPB1	29	0.293103	51	0.323529	aa_37V	0.852
HLA-DPB1	29	0.206897	51	0.254902	aa_38Y	0.543
HLA-DPB1	29	0.0862069	51	0.0686275	aa_38H	0.543
HLA-DPB1	29	0.706897	51	0.676471	aa_38F	0.852
HLA-DPB1	29	0.758621	51	0.794118	aa_40G	0.53
HLA-DPB1	29	0.241379	51	0.205882	aa_40L	0.53
HLA-DPB1	29	0.965517	51	0.990196	aa_62E	0.313
HLA-DPB1	29	0.0344828	51	0.00980392	aa_62Q	0.313
HLA-DPB1	29	0.862069	51	0.813725	aa_64F	0.383
HLA-DPB1	29	0.0517241	51	0.00980392	aa_64L	0.349
HLA-DPB1	29	0.0862069	51	0.176471	aa_64Y	0.183
HLA-DPB1	29	0.37931	51	0.568627	aa_65A	0.0258
HLA-DPB1	29	0.62069	51	0.431373	aa_65V	0.0258
HLA-DPB1	29	0.0689655	51	0.00980392	aa_84E	0.1747
HLA-DPB1	29	0.517241	51	0.421569	aa_84D	0.1682
HLA-DPB1	29	0.413793	51	0.568627	aa_84A	0.0784
HLA-DPB1	29	0.517241	51	0.421569	aa_85E	0.1682
HLA-DPB1	29	0.482759	51	0.578431	aa_85A	0.168
HLA-DPB1	29	0.172414	51	0.137255	aa_86D	0.494
HLA-DPB1	29	0.827586	51	0.862745	aa_86E	0.494
HLA-DPB1	29	0.189655	51	0.117647	aa_94L	0.1684
HLA-DPB1	29	0.810345	51	0.882353	aa_94I	0.168
HLA-DPB1	29	0.258621	51	0.303922	aa_98E	0.717
HLA-DPB1	29	0.0344828	51	0.00980392	aa_98R	0.313
HLA-DPB1	29	0.706897	51	0.686275	aa_98K	0.962
HLA-DPB1	29	0.206897	51	0.235294	aa_105V	0.89
HLA-DPB1	29	0.758621	51	0.715686	aa_105M	0.721
HLA-DPB1	29	0.0344828	51	0.0490196	aa_105I	0.667
HLA-DPB1	29	0.603448	51	0.676471	aa_113G	0.29
HLA-DPB1	29	0.37931	51	0.323529	aa_113D	0.408
HLA-DPB1	29	0.0172414	51	0	aa_113V	0.208
HLA-DPB1	29	0.37931	51	0.323529	aa_114E	0.408
HLA-DPB1	29	0.62069	51	0.676471	aa_114G	0.408
HLA-DPB1	29	0.62069	51	0.676471	aa_115P	0.408
HLA-DPB1	29	0.37931	51	0.323529	aa_115A	0.408
HLA-DPB1	29	0.62069	51	0.676471	aa_116M	0.408
HLA-DPB1	29	0.37931	51	0.323529	aa_116V	0.408
HLA-DPB1	29	0.37931	51	0.294118	aa_125K	0.202
HLA-DPB1	29	0.62069	51	0.705882	aa_125R	0.202
HLA-DPB1	29	0.37931	51	0.294118	aa_199I	0.202
HLA-DPB1	29	0.62069	51	0.705882	aa_199T	0.202
HLA-DPB1	29	0.844828	51	0.911765	aa_207L	0.233
HLA-DPB1	29	0.155172	51	0.0882353	aa_207M	0.233
HLA-DPB1	29	0.965517	51	0.882353	aa_223R	0.1398
HLA-DPB1	29	0.0344828	51	0.117647	aa_223Q	0.14
HLA-DPB1	29	0.913793	51	0.980392	aa_234V	0.209
HLA-DPB1	29	0.0862069	51	0.0196078	aa_234M	0.209
HLA-DPB1	29	0.0172414	51	0	aa_244T	0.208
HLA-DPB1	29	0.982759	51	1	aa_244I	0.208
HLA-DRA	29	0.37931	51	0.264706	aa_242L	0.1957
HLA-DRA	29	0.62069	51	0.735294	aa_242V	0.196
HLA-DRB1	29	0.5	51	0.421569	aa_5R	0.2593
HLA-DRB1	29	0.5	51	0.578431	aa_5K	0.259
HLA-DRB1	29	0.0862069	51	0.127451	aa_6F	0.284
HLA-DRB1	29	0.913793	51	0.872549	aa_6L	0.2841
HLA-DRB1	29	0.224138	51	0.294118	aa_13T	0.343
HLA-DRB1	29	0.775862	51	0.705882	aa_13A	0.343
HLA-DRB1	29	0.5	51	0.578431	aa_14A	0.259
HLA-DRB1	29	0.5	51	0.421569	aa_14V	0.2593
HLA-DRB1	29	0.0862069	51	0.0882353	aa_29S	0.984
HLA-DRB1	29	0.913793	51	0.911765	aa_29A	0.984
HLA-DRB1	29	0.189655	51	0.156863	aa_33Q	0.374
HLA-DRB1	29	0.810345	51	0.843137	aa_33R	0.374
HLA-DRB1	29	0.396552	51	0.411765	aa_39W	0.957
HLA-DRB1	29	0.568966	51	0.54902	aa_39E	0.943
HLA-DRB1	29	0.0172414	51	0	aa_39del	0.26
HLA-DRB1	29	0.0172414	51	0.0392157	aa_39K	0.399
HLA-DRB1	29	0	51	0.0294118	aa_40E	0.178
HLA-DRB1	29	0.5	51	0.578431	aa_40Q	0.259
HLA-DRB1	29	0.0172414	51	0	aa_40del	0.26
HLA-DRB1	29	0.482759	51	0.392157	aa_40Y	0.199
HLA-DRB1	29	0.172414	51	0.117647	aa_41G	0.1513
HLA-DRB1	29	0.482759	51	0.392157	aa_41S	0.199
HLA-DRB1	29	0.0172414	51	0	aa_41del	0.26
HLA-DRB1	29	0.12069	51	0.176471	aa_41L	0.36
HLA-DRB1	29	0.0172414	51	0.0392157	aa_41D	0.399
HLA-DRB1	29	0.103448	51	0.117647	aa_41P	0.825
HLA-DRB1	29	0.0862069	51	0.156863	aa_41V	0.138
HLA-DRB1	29	0.5	51	0.607843	aa_42K	0.132
HLA-DRB1	29	0.0172414	51	0	aa_42del	0.26
HLA-DRB1	29	0.482759	51	0.392157	aa_42T	0.199
HLA-DRB1	29	0.396552	51	0.333333	aa_43S	0.363
HLA-DRB1	29	0.0172414	51	0	aa_43del	0.26
HLA-DRB1	29	0.172414	51	0.117647	aa_43Y	0.1513
HLA-DRB1	29	0.0862069	51	0.0588235	aa_43G	0.494
HLA-DRB1	29	0.0862069	51	0.127451	aa_43H	0.284
HLA-DRB1	29	0.137931	51	0.245098	aa_43F	0.0991
HLA-DRB1	29	0.103448	51	0.117647	aa_43R	0.825
HLA-DRB1	29	0.172414	51	0.117647	aa_44K	0.1513
HLA-DRB1	29	0.0172414	51	0	aa_44del	0.26
HLA-DRB1	29	0.810345	51	0.882353	aa_44E	0.088
HLA-DRB1	29	0.0172414	51	0	aa_45del	0.26
HLA-DRB1	29	0.982759	51	1	aa_45C	0.26
HLA-DRB1	29	0.0172414	51	0	aa_46del	0.26
HLA-DRB1	29	0.0862069	51	0.0588235	aa_46Y	0.494
HLA-DRB1	29	0.896552	51	0.941176	aa_46H	0.319
HLA-DRB1	29	0.982759	51	1	aa_47F	0.26
HLA-DRB1	29	0.0172414	51	0	aa_47del	0.26
HLA-DRB1	29	0.0172414	51	0	aa_48del	0.26
HLA-DRB1	29	0.982759	51	1	aa_48F	0.26
HLA-DRB1	29	0.982759	51	1	aa_49N	0.26
HLA-DRB1	29	0.0172414	51	0	aa_49del	0.26
HLA-DRB1	29	0.0172414	51	0	aa_50del	0.26
HLA-DRB1	29	0.982759	51	1	aa_50G	0.26
HLA-DRB1	29	0.0172414	51	0	aa_51del	0.26
HLA-DRB1	29	0.982759	51	1	aa_51T	0.26
HLA-DRB1	29	0.0172414	51	0	aa_52G	0.26
HLA-DRB1	29	0.982759	51	1	aa_52E	0.26
HLA-DRB1	29	0.0172414	51	0	aa_54L	0.26
HLA-DRB1	29	0.982759	51	1	aa_54V	0.26
HLA-DRB1	29	0.172414	51	0.117647	aa_55Q	0.1513
HLA-DRB1	29	0.827586	51	0.882353	aa_55R	0.1513
HLA-DRB1	29	0.103448	51	0.176471	aa_56Y	0.233
HLA-DRB1	29	0.137931	51	0.215686	aa_56L	0.222
HLA-DRB1	29	0.758621	51	0.607843	aa_56F	0.0409
HLA-DRB1	29	0.0172414	51	0	aa_57del	0.26
HLA-DRB1	29	0.982759	51	1	aa_57L	0.26
HLA-DRB1	29	0.344828	51	0.333333	aa_58E	0.673
HLA-DRB1	29	0.62069	51	0.627451	aa_58D	0.748
HLA-DRB1	29	0.0172414	51	0	aa_58del	0.26
HLA-DRB1	29	0.0172414	51	0.0392157	aa_58H	0.399
HLA-DRB1	29	0.0172414	51	0	aa_59del	0.26
HLA-DRB1	29	0.982759	51	1	aa_59R	0.26
HLA-DRB1	29	0	51	0.0294118	aa_60R	0.178
HLA-DRB1	29	0.172414	51	0.117647	aa_60L	0.1513
HLA-DRB1	29	0.0172414	51	0	aa_60del	0.26
HLA-DRB1	29	0.672414	51	0.607843	aa_60Y	0.556
HLA-DRB1	29	0.12069	51	0.176471	aa_60C	0.36
HLA-DRB1	29	0.0172414	51	0.0392157	aa_60G	0.399
HLA-DRB1	29	0	51	0.0294118	aa_60H	0.287
HLA-DRB1	29	0.137931	51	0.215686	aa_61I	0.206
HLA-DRB1	29	0.0172414	51	0	aa_61del	0.26
HLA-DRB1	29	0.844828	51	0.754902	aa_61F	0.156
HLA-DRB1	29	0	51	0.0294118	aa_61V	0.178
HLA-DRB1	29	0.706897	51	0.715686	aa_62Y	0.93
HLA-DRB1	29	0.0172414	51	0	aa_62del	0.26
HLA-DRB1	29	0.275862	51	0.284314	aa_62H	0.891
HLA-DRB1	29	0.0172414	51	0	aa_63del	0.26
HLA-DRB1	29	0.896552	51	0.872549	aa_63N	0.428
HLA-DRB1	29	0.0862069	51	0.127451	aa_63H	0.284
HLA-DRB1	29	0.0172414	51	0	aa_64del	0.26
HLA-DRB1	29	0.982759	51	1	aa_64Q	0.26
HLA-DRB1	29	0.982759	51	1	aa_65E	0.26
HLA-DRB1	29	0.0172414	51	0	aa_65del	0.26
HLA-DRB1	29	0.0172414	51	0	aa_66del	0.26
HLA-DRB1	29	0.982759	51	1	aa_66E	0.26
HLA-DRB1	29	0.0172414	51	0	aa_67del	0.26
HLA-DRB1	29	0.224138	51	0.294118	aa_67S	0.343
HLA-DRB1	29	0.293103	51	0.294118	aa_67Y	0.836
HLA-DRB1	29	0.258621	51	0.264706	aa_67N	0.864
HLA-DRB1	29	0.206897	51	0.137255	aa_67F	0.0875
HLA-DRB1	29	0	51	0.00980392	aa_67L	0.457
HLA-DRB1	29	0.982759	51	0.960784	aa_68V	0.374
HLA-DRB1	29	0	51	0.00980392	aa_68L	0.457
HLA-DRB1	29	0.0172414	51	0	aa_68del	0.26
HLA-DRB1	29	0	51	0.0294118	aa_68A	0.178
HLA-DRB1	29	0.982759	51	1	aa_69R	0.26
HLA-DRB1	29	0.0172414	51	0	aa_69del	0.26
HLA-DRB1	29	0.0172414	51	0	aa_70del	0.26
HLA-DRB1	29	0	51	0.0294118	aa_70Y	0.178
HLA-DRB1	29	0.982759	51	0.970588	aa_70F	0.546
HLA-DRB1	29	0.982759	51	1	aa_71D	0.26
HLA-DRB1	29	0.0172414	51	0	aa_71del	0.26
HLA-DRB1	29	0.982759	51	1	aa_72S	0.26
HLA-DRB1	29	0.0172414	51	0	aa_72del	0.26
HLA-DRB1	29	0.0172414	51	0	aa_73del	0.26
HLA-DRB1	29	0.982759	51	1	aa_73D	0.26
HLA-DRB1	29	0.0172414	51	0	aa_74del	0.26
HLA-DRB1	29	0.982759	51	1	aa_74V	0.26
HLA-DRB1	29	0.0172414	51	0	aa_75del	0.26
HLA-DRB1	29	0.982759	51	1	aa_75G	0.26
HLA-DRB1	29	0.0172414	51	0	aa_76del	0.26
HLA-DRB1	29	0.982759	51	1	aa_76E	0.26
HLA-DRB1	29	0.0172414	51	0	aa_77del	0.26
HLA-DRB1	29	0.586207	51	0.588235	aa_77Y	0.904
HLA-DRB1	29	0.396552	51	0.411765	aa_77F	0.769
HLA-DRB1	29	0.0172414	51	0	aa_78S	0.26
HLA-DRB1	29	0.982759	51	1	aa_78R	0.26
HLA-DRB1	29	0.982759	51	1	aa_79A	0.26
HLA-DRB1	29	0.0172414	51	0	aa_79V	0.26
HLA-DRB1	29	0.0172414	51	0	aa_80I	0.26
HLA-DRB1	29	0.982759	51	1	aa_80V	0.26
HLA-DRB1	29	0.982759	51	1	aa_81T	0.26
HLA-DRB1	29	0.0172414	51	0	aa_81S	0.26
HLA-DRB1	29	0.0172414	51	0	aa_82S	0.26
HLA-DRB1	29	0.982759	51	1	aa_82E	0.26
HLA-DRB1	29	0.0172414	51	0	aa_83M	0.26
HLA-DRB1	29	0.982759	51	1	aa_83L	0.26
HLA-DRB1	29	0.982759	51	1	aa_86P	0.26
HLA-DRB1	29	0.0172414	51	0	aa_86S	0.26
HLA-DRB1	29	0.189655	51	0.166667	aa_87V	0.505
HLA-DRB1	29	0.672414	51	0.764706	aa_87D	0.155
HLA-DRB1	29	0.0862069	51	0.0490196	aa_87S	0.537
HLA-DRB1	29	0.0344828	51	0.0196078	aa_87A	0.44
HLA-DRB1	29	0.0172414	51	0	aa_87G	0.26
HLA-DRB1	29	0.862069	51	0.911765	aa_88A	0.373
HLA-DRB1	29	0.0172414	51	0	aa_88C	0.26
HLA-DRB1	29	0.12069	51	0.0882353	aa_88E	0.528
HLA-DRB1	29	0.0172414	51	0	aa_89G	0.26
HLA-DRB1	29	0.982759	51	1	aa_89E	0.26
HLA-DRB1	29	0.189655	51	0.166667	aa_90S	0.505
HLA-DRB1	29	0.0172414	51	0	aa_90T	0.26
HLA-DRB1	29	0.758621	51	0.813725	aa_90Y	0.249
HLA-DRB1	29	0.0344828	51	0.0196078	aa_90H	0.44
HLA-DRB1	29	0.0172414	51	0	aa_92T	0.26
HLA-DRB1	29	0.982759	51	1	aa_92N	0.26
HLA-DRB1	29	0.0172414	51	0	aa_93del	0.26
HLA-DRB1	29	0.982759	51	1	aa_93S	0.26
HLA-DRB1	29	0.982759	51	1	aa_94Q	0.26
HLA-DRB1	29	0.0172414	51	0	aa_94del	0.26
HLA-DRB1	29	0.0172414	51	0	aa_95del	0.26
HLA-DRB1	29	0.982759	51	1	aa_95K	0.26
HLA-DRB1	29	0.982759	51	1	aa_96D	0.26
HLA-DRB1	29	0.0172414	51	0	aa_96del	0.26
HLA-DRB1	29	0.431034	51	0.313725	aa_97I	0.1448
HLA-DRB1	29	0.0172414	51	0	aa_97del	0.26
HLA-DRB1	29	0.224138	51	0.205882	aa_97F	0.696
HLA-DRB1	29	0.327586	51	0.480392	aa_97L	0.0327
HLA-DRB1	29	0.0172414	51	0	aa_98del	0.26
HLA-DRB1	29	0.982759	51	1	aa_98L	0.26
HLA-DRB1	29	0.982759	51	1	aa_99E	0.26
HLA-DRB1	29	0.0172414	51	0	aa_99del	0.26
HLA-DRB1	29	0.0172414	51	0	aa_100del	0.26
HLA-DRB1	29	0.37931	51	0.509804	aa_100Q	0.0648
HLA-DRB1	29	0.551724	51	0.401961	aa_100D	0.0319
HLA-DRB1	29	0.0517241	51	0.0882353	aa_100R	0.448
HLA-DRB1	29	0.103448	51	0.186275	aa_101K	0.0838
HLA-DRB1	29	0.0172414	51	0	aa_101del	0.26
HLA-DRB1	29	0.0862069	51	0.0882353	aa_101A	0.984
HLA-DRB1	29	0.155172	51	0.117647	aa_101E	0.782
HLA-DRB1	29	0.637931	51	0.607843	aa_101R	0.427
HLA-DRB1	29	0.982759	51	1	aa_102R	0.26
HLA-DRB1	29	0.0172414	51	0	aa_102del	0.26
HLA-DRB1	29	0.0172414	51	0	aa_103del	0.26
HLA-DRB1	29	0.275862	51	0.254902	aa_103G	0.561
HLA-DRB1	29	0.706897	51	0.745098	aa_103A	0.438
HLA-DRB1	29	0.0862069	51	0.137255	aa_104R	0.387
HLA-DRB1	29	0.0689655	51	0.0882353	aa_104E	0.706
HLA-DRB1	29	0.0862069	51	0.0490196	aa_104L	0.339
HLA-DRB1	29	0.0172414	51	0	aa_104del	0.26
HLA-DRB1	29	0.189655	51	0.117647	aa_104Q	0.1078
HLA-DRB1	29	0.551724	51	0.607843	aa_104A	0.344
HLA-DRB1	29	0.0172414	51	0	aa_105del	0.26
HLA-DRB1	29	0.982759	51	1	aa_105V	0.26
HLA-DRB1	29	0.0862069	51	0.137255	aa_107N	0.387
HLA-DRB1	29	0.913793	51	0.862745	aa_107T	0.387
HLA-DRB1	29	0.0172414	51	0	aa_108del	0.26
HLA-DRB1	29	0.775862	51	0.843137	aa_108Y	0.179
HLA-DRB1	29	0.206897	51	0.156863	aa_108V	0.273
HLA-DRB1	29	0.0172414	51	0	aa_109del	0.26
HLA-DRB1	29	0.982759	51	1	aa_109C	0.26
HLA-DRB1	29	0.0172414	51	0	aa_110del	0.26
HLA-DRB1	29	0.982759	51	1	aa_110R	0.26
HLA-DRB1	29	0.0172414	51	0	aa_111del	0.26
HLA-DRB1	29	0.982759	51	1	aa_111H	0.26
HLA-DRB1	29	0.982759	51	1	aa_112N	0.26
HLA-DRB1	29	0.0172414	51	0	aa_112del	0.26
HLA-DRB1	29	0.982759	51	1	aa_113Y	0.26
HLA-DRB1	29	0.0172414	51	0	aa_113del	0.26
HLA-DRB1	29	0.982759	51	1	aa_114G	0.26
HLA-DRB1	29	0.0172414	51	0	aa_114del	0.26
HLA-DRB1	29	0.931034	51	0.921569	aa_115V	0.679
HLA-DRB1	29	0.0517241	51	0.0784314	aa_115A	0.429
HLA-DRB1	29	0.0172414	51	0	aa_115del	0.26
HLA-DRB1	29	0.431034	51	0.480392	aa_116V	0.4991
HLA-DRB1	29	0.551724	51	0.519608	aa_116G	0.636
HLA-DRB1	29	0.0172414	51	0	aa_116del	0.26
HLA-DRB1	29	0.0172414	51	0	aa_117del	0.26
HLA-DRB1	29	0.982759	51	1	aa_117E	0.26
HLA-DRB1	29	0.982759	51	1	aa_118S	0.26
HLA-DRB1	29	0.0172414	51	0	aa_118del	0.26
HLA-DRB1	29	0.982759	51	1	aa_119F	0.26
HLA-DRB1	29	0.0172414	51	0	aa_119del	0.26
HLA-DRB1	29	0.982759	51	1	aa_120T	0.26
HLA-DRB1	29	0.0172414	51	0	aa_120S	0.26
HLA-DRB1	29	0.0172414	51	0	aa_121I	0.26
HLA-DRB1	29	0.982759	51	1	aa_121V	0.26
HLA-DRB1	29	0.0172414	51	0	aa_122T	0.26
HLA-DRB1	29	0.982759	51	1	aa_122Q	0.26
HLA-DRB1	29	0.982759	51	1	aa_125V	0.26
HLA-DRB1	29	0.0172414	51	0	aa_125del	0.26
HLA-DRB1	29	0.12069	51	0.176471	aa_126E	0.36
HLA-DRB1	29	0.672414	51	0.54902	aa_126H	0.083
HLA-DRB1	29	0.0172414	51	0	aa_126del	0.26
HLA-DRB1	29	0.103448	51	0.147059	aa_126Q	0.443
HLA-DRB1	29	0.0862069	51	0.127451	aa_126Y	0.284
HLA-DRB1	29	0.0172414	51	0	aa_127del	0.26
HLA-DRB1	29	0.982759	51	1	aa_127P	0.26
HLA-DRB1	29	0.706897	51	0.705882	aa_128K	0.923
HLA-DRB1	29	0.0172414	51	0	aa_128del	0.26
HLA-DRB1	29	0.275862	51	0.294118	aa_128E	0.765
HLA-DRB1	29	0.982759	51	1	aa_129V	0.26
HLA-DRB1	29	0.0172414	51	0	aa_129del	0.26
HLA-DRB1	29	0.0172414	51	0	aa_130del	0.26
HLA-DRB1	29	0.982759	51	1	aa_130T	0.26
HLA-DRB1	29	0.0172414	51	0	aa_131del	0.26
HLA-DRB1	29	0.982759	51	1	aa_131V	0.26
HLA-DRB1	29	0.982759	51	1	aa_132Y	0.26
HLA-DRB1	29	0.0172414	51	0	aa_132del	0.26
HLA-DRB1	29	0.982759	51	1	aa_133P	0.26
HLA-DRB1	29	0.0172414	51	0	aa_133del	0.26
HLA-DRB1	29	0.0172414	51	0	aa_134del	0.26
HLA-DRB1	29	0.706897	51	0.715686	aa_134S	0.955
HLA-DRB1	29	0.275862	51	0.284314	aa_134A	0.878
HLA-DRB1	29	0.982759	51	1	aa_135K	0.26
HLA-DRB1	29	0.0172414	51	0	aa_135del	0.26
HLA-DRB1	29	0.982759	51	1	aa_136T	0.26
HLA-DRB1	29	0.0172414	51	0	aa_136del	0.26
HLA-DRB1	29	0.982759	51	1	aa_137Q	0.26
HLA-DRB1	29	0.0172414	51	0	aa_137del	0.26
HLA-DRB1	29	0.0172414	51	0	aa_138del	0.26
HLA-DRB1	29	0.982759	51	1	aa_138P	0.26
HLA-DRB1	29	0.982759	51	1	aa_139L	0.26
HLA-DRB1	29	0.0172414	51	0	aa_139del	0.26
HLA-DRB1	29	0.982759	51	1	aa_140Q	0.26
HLA-DRB1	29	0.0172414	51	0	aa_140del	0.26
HLA-DRB1	29	0.982759	51	1	aa_141H	0.26
HLA-DRB1	29	0.0172414	51	0	aa_141del	0.26
HLA-DRB1	29	0.0172414	51	0	aa_142del	0.26
HLA-DRB1	29	0.982759	51	1	aa_142H	0.26
HLA-DRB1	29	0.982759	51	1	aa_143N	0.26
HLA-DRB1	29	0.0172414	51	0	aa_143del	0.26
HLA-DRB1	29	0.0172414	51	0	aa_144del	0.26
HLA-DRB1	29	0.982759	51	1	aa_144L	0.26
HLA-DRB1	29	0.0172414	51	0	aa_145del	0.26
HLA-DRB1	29	0.982759	51	1	aa_145L	0.26
HLA-DRB1	29	0.982759	51	1	aa_146V	0.26
HLA-DRB1	29	0.0172414	51	0	aa_146del	0.26
HLA-DRB1	29	0.982759	51	1	aa_147C	0.26
HLA-DRB1	29	0.0172414	51	0	aa_147del	0.26
HLA-DRB1	29	0.982759	51	1	aa_148S	0.26
HLA-DRB1	29	0.0172414	51	0	aa_148del	0.26
HLA-DRB1	29	0.0172414	51	0	aa_149del	0.26
HLA-DRB1	29	0.982759	51	1	aa_149V	0.26
HLA-DRB1	29	0.0862069	51	0.156863	aa_150N	0.138
HLA-DRB1	29	0.0172414	51	0	aa_150del	0.26
HLA-DRB1	29	0.896552	51	0.843137	aa_150S	0.2206
HLA-DRB1	29	0.0172414	51	0	aa_151del	0.26
HLA-DRB1	29	0.982759	51	1	aa_151G	0.26
HLA-DRB1	29	0.982759	51	1	aa_152F	0.26
HLA-DRB1	29	0.0172414	51	0	aa_152del	0.26
HLA-DRB1	29	0.982759	51	1	aa_153Y	0.26
HLA-DRB1	29	0.0172414	51	0	aa_153del	0.26
HLA-DRB1	29	0.0172414	51	0	aa_154del	0.26
HLA-DRB1	29	0.982759	51	1	aa_154P	0.26
HLA-DRB1	29	0.982759	51	1	aa_155G	0.26
HLA-DRB1	29	0.0172414	51	0	aa_155del	0.26
HLA-DRB1	29	0.0172414	51	0	aa_156del	0.26
HLA-DRB1	29	0.982759	51	1	aa_156S	0.26
HLA-DRB1	29	0.982759	51	1	aa_157I	0.26
HLA-DRB1	29	0.0172414	51	0	aa_157del	0.26
HLA-DRB1	29	0.0172414	51	0	aa_158del	0.26
HLA-DRB1	29	0.982759	51	1	aa_158E	0.26
HLA-DRB1	29	0.982759	51	1	aa_159V	0.26
HLA-DRB1	29	0.0172414	51	0	aa_159del	0.26
HLA-DRB1	29	0.0172414	51	0	aa_160del	0.26
HLA-DRB1	29	0.982759	51	1	aa_160R	0.26
HLA-DRB1	29	0.982759	51	1	aa_161W	0.26
HLA-DRB1	29	0.0172414	51	0	aa_161del	0.26
HLA-DRB1	29	0.0172414	51	0	aa_162del	0.26
HLA-DRB1	29	0.982759	51	1	aa_162F	0.26
HLA-DRB1	29	0.103448	51	0.117647	aa_163L	0.825
HLA-DRB1	29	0.87931	51	0.882353	aa_163R	0.956
HLA-DRB1	29	0.0172414	51	0	aa_163del	0.26
HLA-DRB1	29	0.982759	51	1	aa_164N	0.26
HLA-DRB1	29	0.0172414	51	0	aa_164del	0.26
HLA-DRB1	29	0.0172414	51	0	aa_165del	0.26
HLA-DRB1	29	0.982759	51	1	aa_165G	0.26
HLA-DRB1	29	0.0172414	51	0	aa_166del	0.26
HLA-DRB1	29	0.982759	51	1	aa_166Q	0.26
HLA-DRB1	29	0.0172414	51	0	aa_167del	0.26
HLA-DRB1	29	0.982759	51	1	aa_167E	0.26
HLA-DRB1	29	0.982759	51	1	aa_168E	0.26
HLA-DRB1	29	0.0172414	51	0	aa_168del	0.26
HLA-DRB1	29	0.0172414	51	0	aa_169del	0.26
HLA-DRB1	29	0.982759	51	1	aa_169K	0.26
HLA-DRB1	29	0.568966	51	0.54902	aa_170T	0.943
HLA-DRB1	29	0.0172414	51	0	aa_170del	0.26
HLA-DRB1	29	0.413793	51	0.45098	aa_170A	0.779
HLA-DRB1	29	0.0172414	51	0	aa_171del	0.26
HLA-DRB1	29	0.982759	51	1	aa_171G	0.26
HLA-DRB1	29	0.87931	51	0.882353	aa_172V	0.956
HLA-DRB1	29	0.103448	51	0.117647	aa_172M	0.825
HLA-DRB1	29	0.0172414	51	0	aa_172del	0.26
HLA-DRB1	29	0.0172414	51	0	aa_173del	0.26
HLA-DRB1	29	0.982759	51	1	aa_173V	0.26
HLA-DRB1	29	0.982759	51	1	aa_174S	0.26
HLA-DRB1	29	0.0172414	51	0	aa_174del	0.26
HLA-DRB1	29	0.982759	51	1	aa_175T	0.26
HLA-DRB1	29	0.0172414	51	0	aa_175del	0.26
HLA-DRB1	29	0.982759	51	1	aa_176G	0.26
HLA-DRB1	29	0.0172414	51	0	aa_176del	0.26
HLA-DRB1	29	0.982759	51	1	aa_177L	0.26
HLA-DRB1	29	0.0172414	51	0	aa_177del	0.26
HLA-DRB1	29	0.982759	51	1	aa_178I	0.26
HLA-DRB1	29	0.0172414	51	0	aa_178del	0.26
HLA-DRB1	29	0.5	51	0.607843	aa_179Q	0.132
HLA-DRB1	29	0.0172414	51	0	aa_179del	0.26
HLA-DRB1	29	0.482759	51	0.392157	aa_179H	0.199
HLA-DRB1	29	0.0172414	51	0	aa_180del	0.26
HLA-DRB1	29	0.982759	51	1	aa_180N	0.26
HLA-DRB1	29	0.982759	51	1	aa_181G	0.26
HLA-DRB1	29	0.0172414	51	0	aa_181del	0.26
HLA-DRB1	29	0.982759	51	1	aa_182D	0.26
HLA-DRB1	29	0.0172414	51	0	aa_182del	0.26
HLA-DRB1	29	0.982759	51	1	aa_183W	0.26
HLA-DRB1	29	0.0172414	51	0	aa_183del	0.26
HLA-DRB1	29	0.982759	51	1	aa_184T	0.26
HLA-DRB1	29	0.0172414	51	0	aa_184del	0.26
HLA-DRB1	29	0.982759	51	1	aa_185F	0.26
HLA-DRB1	29	0.0172414	51	0	aa_185del	0.26
HLA-DRB1	29	0.0172414	51	0	aa_186del	0.26
HLA-DRB1	29	0.982759	51	1	aa_186Q	0.26
HLA-DRB1	29	0.0172414	51	0	aa_187del	0.26
HLA-DRB1	29	0.982759	51	1	aa_187T	0.26
HLA-DRB1	29	0.982759	51	1	aa_188L	0.26
HLA-DRB1	29	0.0172414	51	0	aa_188del	0.26
HLA-DRB1	29	0.0172414	51	0	aa_189del	0.26
HLA-DRB1	29	0.982759	51	1	aa_189V	0.26
HLA-DRB1	29	0.0172414	51	0	aa_190del	0.26
HLA-DRB1	29	0.982759	51	1	aa_190M	0.26
HLA-DRB1	29	0.982759	51	1	aa_191L	0.26
HLA-DRB1	29	0.0172414	51	0	aa_191del	0.26
HLA-DRB1	29	0.0172414	51	0	aa_192del	0.26
HLA-DRB1	29	0.982759	51	1	aa_192E	0.26
HLA-DRB1	29	0.0172414	51	0	aa_193del	0.26
HLA-DRB1	29	0.982759	51	1	aa_193T	0.26
HLA-DRB1	29	0.0172414	51	0	aa_194del	0.26
HLA-DRB1	29	0.982759	51	1	aa_194V	0.26
HLA-DRB1	29	0.982759	51	1	aa_195P	0.26
HLA-DRB1	29	0.0172414	51	0	aa_195del	0.26
HLA-DRB1	29	0.982759	51	0.970588	aa_196R	0.546
HLA-DRB1	29	0	51	0.0294118	aa_196Q	0.178
HLA-DRB1	29	0.0172414	51	0	aa_196del	0.26
HLA-DRB1	29	0.982759	51	1	aa_197S	0.26
HLA-DRB1	29	0.0172414	51	0	aa_197del	0.26
HLA-DRB1	29	0.0172414	51	0	aa_198del	0.26
HLA-DRB1	29	0.982759	51	1	aa_198G	0.26
HLA-DRB1	29	0.0172414	51	0	aa_199del	0.26
HLA-DRB1	29	0.982759	51	1	aa_199E	0.26
HLA-DRB1	29	0.0172414	51	0	aa_200del	0.26
HLA-DRB1	29	0.982759	51	1	aa_200V	0.26
HLA-DRB1	29	0.982759	51	1	aa_201Y	0.26
HLA-DRB1	29	0.0172414	51	0	aa_201R	0.26
HLA-DRB1	29	0.0172414	51	0	aa_204A	0.26
HLA-DRB1	29	0.982759	51	1	aa_204Q	0.26
HLA-DRB1	29	0.0172414	51	0	aa_205S	0.26
HLA-DRB1	29	0.982759	51	1	aa_205V	0.26
HLA-DRB1	29	0.0172414	51	0	aa_206del	0.26
HLA-DRB1	29	0.982759	51	1	aa_206E	0.26
HLA-DRB1	29	0.982759	51	1	aa_207H	0.26
HLA-DRB1	29	0.0172414	51	0	aa_207del	0.26
HLA-DRB1	29	0.982759	51	1	aa_208P	0.26
HLA-DRB1	29	0.0172414	51	0	aa_208del	0.26
HLA-DRB1	29	0.982759	51	1	aa_209S	0.26
HLA-DRB1	29	0.0172414	51	0	aa_209del	0.26
HLA-DRB1	29	0.0172414	51	0	aa_210del	0.26
HLA-DRB1	29	0.896552	51	0.872549	aa_210V	0.428
HLA-DRB1	29	0.0862069	51	0.127451	aa_210L	0.284
HLA-DRB1	29	0.189655	51	0.186275	aa_211M	0.758
HLA-DRB1	29	0.0172414	51	0	aa_211del	0.26
HLA-DRB1	29	0.793103	51	0.813725	aa_211T	0.579
HLA-DRB1	29	0.0172414	51	0	aa_212del	0.26
HLA-DRB1	29	0.982759	51	1	aa_212S	0.26
HLA-DRB1	29	0.982759	51	1	aa_213P	0.26
HLA-DRB1	29	0.0172414	51	0	aa_213del	0.26
HLA-DRB1	29	0.982759	51	1	aa_214L	0.26
HLA-DRB1	29	0.0172414	51	0	aa_214del	0.26
HLA-DRB1	29	0.982759	51	1	aa_216V	0.26
HLA-DRB1	29	0.0172414	51	0	aa_216A	0.26
HLA-DRB1	29	0.0172414	51	0	aa_217T	0.26
HLA-DRB1	29	0.982759	51	1	aa_217E	0.26
HLA-DRB1	29	0.0862069	51	0.0490196	aa_219S	0.339
HLA-DRB1	29	0.0172414	51	0	aa_219del	0.26
HLA-DRB1	29	0.896552	51	0.95098	aa_219R	0.204
HLA-DRB1	29	0.0172414	51	0	aa_220del	0.26
HLA-DRB1	29	0.982759	51	1	aa_220A	0.26
HLA-DRB1	29	0.0172414	51	0	aa_221del	0.26
HLA-DRB1	29	0.982759	51	1	aa_221R	0.26
HLA-DRB1	29	0.982759	51	1	aa_222S	0.26
HLA-DRB1	29	0.0172414	51	0	aa_222del	0.26
HLA-DRB1	29	0.0172414	51	0	aa_223del	0.26
HLA-DRB1	29	0.982759	51	1	aa_223E	0.26
HLA-DRB1	29	0.982759	51	1	aa_224S	0.26
HLA-DRB1	29	0.0172414	51	0	aa_224del	0.26
HLA-DRB1	29	0.982759	51	1	aa_225A	0.26
HLA-DRB1	29	0.0172414	51	0	aa_225del	0.26
HLA-DRB1	29	0.982759	51	1	aa_226Q	0.26
HLA-DRB1	29	0.0172414	51	0	aa_226del	0.26
HLA-DRB1	29	0.0172414	51	0	aa_227del	0.26
HLA-DRB1	29	0.982759	51	1	aa_227S	0.26
HLA-DRB1	29	0.0172414	51	0	aa_228del	0.26
HLA-DRB1	29	0.982759	51	1	aa_228K	0.26
HLA-DRB1	29	0.982759	51	1	aa_229M	0.26
HLA-DRB1	29	0.0172414	51	0	aa_229del	0.26
HLA-DRB1	29	0.0172414	51	0	aa_230del	0.26
HLA-DRB1	29	0.982759	51	1	aa_230L	0.26
HLA-DRB1	29	0.0172414	51	0	aa_231del	0.26
HLA-DRB1	29	0.982759	51	1	aa_231S	0.26
HLA-DRB1	29	0.982759	51	1	aa_232G	0.26
HLA-DRB1	29	0.0172414	51	0	aa_232del	0.26
HLA-DRB1	29	0.982759	51	1	aa_233V	0.26
HLA-DRB1	29	0.0172414	51	0	aa_233del	0.26
HLA-DRB1	29	0.0172414	51	0	aa_234del	0.26
HLA-DRB1	29	0.982759	51	1	aa_234G	0.26
HLA-DRB1	29	0.982759	51	1	aa_235G	0.26
HLA-DRB1	29	0.0172414	51	0	aa_235del	0.26
HLA-DRB1	29	0.0172414	51	0	aa_236del	0.26
HLA-DRB1	29	0.982759	51	1	aa_236F	0.26
HLA-DRB1	29	0.982759	51	1	aa_237V	0.26
HLA-DRB1	29	0.0172414	51	0	aa_237del	0.26
HLA-DRB1	29	0.0172414	51	0	aa_238del	0.26
HLA-DRB1	29	0.982759	51	1	aa_238L	0.26
HLA-DRB1	29	0.982759	51	1	aa_239G	0.26
HLA-DRB1	29	0.0172414	51	0	aa_239del	0.26
HLA-DRB1	29	0.982759	51	1	aa_240L	0.26
HLA-DRB1	29	0.0172414	51	0	aa_240del	0.26
HLA-DRB1	29	0.0172414	51	0	aa_241del	0.26
HLA-DRB1	29	0.982759	51	1	aa_241L	0.26
HLA-DRB1	29	0.982759	51	1	aa_242F	0.26
HLA-DRB1	29	0.0172414	51	0	aa_242del	0.26
HLA-DRB1	29	0.982759	51	1	aa_243L	0.26
HLA-DRB1	29	0.0172414	51	0	aa_243del	0.26
HLA-DRB1	29	0.0172414	51	0	aa_244del	0.26
HLA-DRB1	29	0.982759	51	1	aa_244G	0.26
HLA-DRB1	29	0.982759	51	1	aa_245A	0.26
HLA-DRB1	29	0.0172414	51	0	aa_245del	0.26
HLA-DRB1	29	0.982759	51	1	aa_246G	0.26
HLA-DRB1	29	0.0172414	51	0	aa_246del	0.26
HLA-DRB1	29	0.0172414	51	0	aa_247del	0.26
HLA-DRB1	29	0.982759	51	1	aa_247L	0.26
HLA-DRB1	29	0.0172414	51	0	aa_248del	0.26
HLA-DRB1	29	0.982759	51	1	aa_248F	0.26
HLA-DRB1	29	0.982759	51	1	aa_249I	0.26
HLA-DRB1	29	0.0172414	51	0	aa_249del	0.26
HLA-DRB1	29	0.982759	51	1	aa_250Y	0.26
HLA-DRB1	29	0.0172414	51	0	aa_250del	0.26
HLA-DRB1	29	0.982759	51	1	aa_251F	0.26
HLA-DRB1	29	0.0172414	51	0	aa_251del	0.26
HLA-DRB1	29	0.0172414	51	0	aa_252del	0.26
HLA-DRB1	29	0.982759	51	1	aa_252R	0.26
HLA-DRB1	29	0.982759	51	1	aa_253N	0.26
HLA-DRB1	29	0.0172414	51	0	aa_253del	0.26
HLA-DRB1	29	0.982759	51	1	aa_254Q	0.26
HLA-DRB1	29	0.0172414	51	0	aa_254del	0.26
HLA-DRB1	29	0.0172414	51	0	aa_255del	0.26
HLA-DRB1	29	0.982759	51	1	aa_255K	0.26
HLA-DRB1	29	0.0172414	51	0	aa_257S	0.26
HLA-DRB1	29	0.982759	51	1	aa_257H	0.26
HLA-DRB1	29	0.0172414	51	0	aa_260R	0.26
HLA-DRB1	29	0.982759	51	1	aa_260L	0.26
HLA-DRB1	29	0.0172414	51	0	aa_261del	0.26
HLA-DRB1	29	0.982759	51	1	aa_261Q	0.26
HLA-DRB1	29	0.0172414	51	0	aa_262del	0.26
HLA-DRB1	29	0.982759	51	1	aa_262P	0.26
HLA-DRB1	29	0.534483	51	0.411765	aa_263R	0.1577
HLA-DRB1	29	0.0172414	51	0	aa_263del	0.26
HLA-DRB1	29	0.448276	51	0.588235	aa_263T	0.109
HLA-DRB1	29	0.0172414	51	0	aa_264del	0.26
HLA-DRB1	29	0.982759	51	1	aa_264G	0.26
HLA-DRB1	29	0.0172414	51	0	aa_265del	0.26
HLA-DRB1	29	0.982759	51	1	aa_265F	0.26
HLA-DRB1	29	0.982759	51	1	aa_266L	0.26
HLA-DRB1	29	0.0172414	51	0	aa_266del	0.26
HLA-DRB1	29	0.982759	51	1	aa_267S	0.26
HLA-DRB1	29	0.0172414	51	0	aa_267del	0.26
HLA-DRB1	29	0.982759	51	1	aa_268X	0.26
HLA-DRB1	29	0.0172414	51	0	aa_268del	0.26
HLA-E	29	0.37931	51	0.490196	aa_128G	0.293
HLA-E	29	0.62069	51	0.509804	aa_128R	0.293
HLA-E	29	0.982759	51	1	aa_217D	0.3
HLA-E	29	0.0172414	51	0	aa_217N	0.3
HLA-E	29	0	51	0.0392157	aa_288S	0.205
HLA-E	29	1	51	0.960784	aa_288P	0.2053
HLA-F	29	1	51	0.980392	aa_71P	0.2335
HLA-F	29	0	51	0.0196078	aa_71Q	0.2335
HLA-F	29	0	51	0.00980392	aa_205T	0.439
HLA-F	29	1	51	0.990196	aa_205P	0.439
HLA-F	29	0.0862069	51	0.166667	aa_272P	0.29
HLA-F	29	0.913793	51	0.833333	aa_272S	0.2902
HLA-G	29	0.0689655	51	0.0294118	aa_55S	0.185
HLA-G	29	0.931034	51	0.970588	aa_55T	0.185
HLA-G	29	0.137931	51	0.166667	aa_134I	0.53
HLA-G	29	0.862069	51	0.833333	aa_134L	0.53
HLA-G	29	0.0172414	51	0.00980392	aa_154del	0.611
HLA-G	29	0.982759	51	0.990196	aa_154L	0.611
HLA-G	29	0.0172414	51	0.00980392	aa_155del	0.611
HLA-G	29	0.982759	51	0.990196	aa_155R	0.611
HLA-G	29	0.0172414	51	0.00980392	aa_156del	0.611
HLA-G	29	0.982759	51	0.990196	aa_156S	0.611
HLA-G	29	0.0172414	51	0.00980392	aa_157del	0.611
HLA-G	29	0.982759	51	0.990196	aa_157W	0.611
HLA-G	29	0.982759	51	0.990196	aa_158T	0.611
HLA-G	29	0.0172414	51	0.00980392	aa_158del	0.611
HLA-G	29	0.982759	51	0.990196	aa_159A	0.611
HLA-G	29	0.0172414	51	0.00980392	aa_159C	0.611
HLA-G	29	0.0172414	51	0.00980392	aa_161P	0.611
HLA-G	29	0.982759	51	0.990196	aa_161D	0.611
HLA-G	29	0.0172414	51	0.00980392	aa_162G	0.611
HLA-G	29	0.982759	51	0.990196	aa_162T	0.611
HLA-G	29	0.982759	51	0.990196	aa_163A	0.611
HLA-G	29	0.0172414	51	0.00980392	aa_163P	0.611
HLA-G	29	0.982759	51	0.990196	aa_164A	0.611
HLA-G	29	0.0172414	51	0.00980392	aa_164Q	0.611
HLA-G	29	0.0172414	51	0.00980392	aa_165R	0.611
HLA-G	29	0.982759	51	0.990196	aa_165Q	0.611
HLA-G	29	0.0172414	51	0.00980392	aa_166T	0.611
HLA-G	29	0.982759	51	0.990196	aa_166I	0.611
HLA-G	29	0.0172414	51	0.00980392	aa_167L	0.611
HLA-G	29	0.982759	51	0.990196	aa_167S	0.611
HLA-G	29	0.0172414	51	0.00980392	aa_168R	0.611
HLA-G	29	0.982759	51	0.990196	aa_168K	0.611
HLA-G	29	0.0172414	51	0.00980392	aa_169L	0.611
HLA-G	29	0.982759	51	0.990196	aa_169R	0.611
HLA-G	29	0.0172414	51	0.00980392	aa_170R	0.611
HLA-G	29	0.982759	51	0.990196	aa_170K	0.611
HLA-G	29	0.982759	51	0.990196	aa_171C	0.611
HLA-G	29	0.0172414	51	0.00980392	aa_171S	0.611
HLA-G	29	0.0172414	51	0.00980392	aa_172P	0.611
HLA-G	29	0.982759	51	0.990196	aa_172E	0.611
HLA-G	29	0.982759	51	0.990196	aa_173A	0.611
HLA-G	29	0.0172414	51	0.00980392	aa_173S	0.611
HLA-G	29	0.0172414	51	0.00980392	aa_175S	0.611
HLA-G	29	0.982759	51	0.990196	aa_175N	0.611
HLA-G	29	0.982759	51	0.990196	aa_177A	0.611
HLA-G	29	0.0172414	51	0.00980392	aa_177del	0.611
HLA-G	29	0.0172414	51	0.00980392	aa_178del	0.611
HLA-G	29	0.982759	51	0.990196	aa_178E	0.611
HLA-G	29	0.0172414	51	0.00980392	aa_179del	0.611
HLA-G	29	0.982759	51	0.990196	aa_179Q	0.611
HLA-G	29	0.0172414	51	0.00980392	aa_182P	0.611
HLA-G	29	0.982759	51	0.990196	aa_182A	0.611
HLA-G	29	0.982759	51	0.990196	aa_183Y	0.611
HLA-G	29	0.0172414	51	0.00980392	aa_183M	0.611
HLA-G	29	0.0172414	51	0.00980392	aa_184del	0.611
HLA-G	29	0.982759	51	0.990196	aa_184L	0.611
HLA-G	29	0.0172414	51	0.00980392	aa_185del	0.611
HLA-G	29	0.982759	51	0.990196	aa_185E	0.611
HLA-G	29	0.982759	51	0.990196	aa_186G	0.611
HLA-G	29	0.0172414	51	0.00980392	aa_186del	0.611
HLA-G	29	0.0172414	51	0.00980392	aa_187del	0.611
HLA-G	29	0.982759	51	0.990196	aa_187T	0.611
HLA-G	29	0.0172414	51	0.00980392	aa_188del	0.611
HLA-G	29	0.982759	51	0.990196	aa_188C	0.611
HLA-G	29	0.0172414	51	0.00980392	aa_189del	0.611
HLA-G	29	0.982759	51	0.990196	aa_189V	0.611
HLA-G	29	0.982759	51	0.990196	aa_190E	0.611
HLA-G	29	0.0172414	51	0.00980392	aa_190del	0.611
HLA-G	29	0.0172414	51	0.00980392	aa_193del	0.611
HLA-G	29	0.982759	51	0.990196	aa_193H	0.611
HLA-G	29	0.0172414	51	0.00980392	aa_194del	0.611
HLA-G	29	0.982759	51	0.990196	aa_194R	0.611
HLA-G	29	0.982759	51	0.990196	aa_195Y	0.611
HLA-G	29	0.0172414	51	0.00980392	aa_195del	0.611
HLA-G	29	0.982759	51	0.990196	aa_196L	0.611
HLA-G	29	0.0172414	51	0.00980392	aa_196del	0.611
HLA-G	29	0.982759	51	0.990196	aa_197E	0.611
HLA-G	29	0.0172414	51	0.00980392	aa_197del	0.611
HLA-G	29	0.0172414	51	0.00980392	aa_199K	0.611
HLA-G	29	0.982759	51	0.990196	aa_199G	0.611
HLA-G	29	0.0172414	51	0.00980392	aa_200G	0.611
HLA-G	29	0.982759	51	0.990196	aa_200K	0.611
HLA-G	29	0.0172414	51	0.00980392	aa_202P	0.611
HLA-G	29	0.982759	51	0.990196	aa_202M	0.611
HLA-G	29	0.982759	51	0.990196	aa_203L	0.611
HLA-G	29	0.0172414	51	0.00980392	aa_203T	0.611
HLA-G	29	0.0172414	51	0.00980392	aa_204W	0.611
HLA-G	29	0.982759	51	0.990196	aa_204Q	0.611
HLA-G	29	0.982759	51	0.990196	aa_207D	0.611
HLA-G	29	0.0172414	51	0.00980392	aa_207del	0.611
HLA-G	29	0.0172414	51	0.00980392	aa_208del	0.611
HLA-G	29	0.982759	51	0.990196	aa_208P	0.611
HLA-G	29	0.0172414	51	0.00980392	aa_209del	0.611
HLA-G	29	0.982759	51	0.990196	aa_209P	0.611
HLA-G	29	0.0172414	51	0.00980392	aa_210del	0.611
HLA-G	29	0.982759	51	0.990196	aa_210K	0.611
HLA-G	29	0.982759	51	0.990196	aa_211T	0.611
HLA-G	29	0.0172414	51	0.00980392	aa_211del	0.611
HLA-G	29	0.982759	51	0.990196	aa_212H	0.611
HLA-G	29	0.0172414	51	0.00980392	aa_212del	0.611
HLA-G	29	0.982759	51	0.990196	aa_213V	0.611
HLA-G	29	0.0172414	51	0.00980392	aa_213del	0.611
HLA-G	29	0.982759	51	0.990196	aa_214T	0.611
HLA-G	29	0.0172414	51	0.00980392	aa_214del	0.611
HLA-G	29	0.982759	51	0.990196	aa_215H	0.611
HLA-G	29	0.0172414	51	0.00980392	aa_215del	0.611
HLA-G	29	0.982759	51	0.990196	aa_216H	0.611
HLA-G	29	0.0172414	51	0.00980392	aa_216del	0.611
HLA-G	29	0.0172414	51	0.00980392	aa_217del	0.611
HLA-G	29	0.982759	51	0.990196	aa_217P	0.611
HLA-G	29	0.0172414	51	0.00980392	aa_218del	0.611
HLA-G	29	0.982759	51	0.990196	aa_218V	0.611
HLA-G	29	0.0172414	51	0.00980392	aa_219del	0.611
HLA-G	29	0.982759	51	0.990196	aa_219F	0.611
HLA-G	29	0.982759	51	0.990196	aa_220D	0.611
HLA-G	29	0.0172414	51	0.00980392	aa_220del	0.611
HLA-G	29	0.0172414	51	0.00980392	aa_221del	0.611
HLA-G	29	0.982759	51	0.990196	aa_221Y	0.611
HLA-G	29	0.982759	51	0.990196	aa_222E	0.611
HLA-G	29	0.0172414	51	0.00980392	aa_222del	0.611
HLA-G	29	0.0172414	51	0.00980392	aa_223del	0.611
HLA-G	29	0.982759	51	0.990196	aa_223A	0.611
HLA-G	29	0.982759	51	0.990196	aa_224T	0.611
HLA-G	29	0.0172414	51	0.00980392	aa_224del	0.611
HLA-G	29	0.982759	51	0.990196	aa_225L	0.611
HLA-G	29	0.0172414	51	0.00980392	aa_225del	0.611
HLA-G	29	0.0172414	51	0.00980392	aa_227A	0.611
HLA-G	29	0.982759	51	0.990196	aa_227C	0.611
HLA-G	29	0.0172414	51	0.00980392	aa_229S	0.611
HLA-G	29	0.982759	51	0.990196	aa_229A	0.611
HLA-G	29	0.0172414	51	0.00980392	aa_230del	0.611
HLA-G	29	0.982759	51	0.990196	aa_230L	0.611
HLA-G	29	0.982759	51	0.990196	aa_231G	0.611
HLA-G	29	0.0172414	51	0.00980392	aa_231del	0.611
HLA-G	29	0.982759	51	0.990196	aa_232F	0.611
HLA-G	29	0.0172414	51	0.00980392	aa_232del	0.611
HLA-G	29	0.982759	51	0.990196	aa_233Y	0.611
HLA-G	29	0.0172414	51	0.00980392	aa_233del	0.611
HLA-G	29	0.0172414	51	0.00980392	aa_234del	0.611
HLA-G	29	0.982759	51	0.990196	aa_234P	0.611
HLA-G	29	0.982759	51	0.990196	aa_235A	0.611
HLA-G	29	0.0172414	51	0.00980392	aa_235del	0.611
HLA-G	29	0.982759	51	0.990196	aa_236E	0.611
HLA-G	29	0.0172414	51	0.00980392	aa_236del	0.611
HLA-G	29	0.0172414	51	0.00980392	aa_237del	0.611
HLA-G	29	0.982759	51	0.990196	aa_237I	0.611
HLA-G	29	0.0172414	51	0.00980392	aa_238del	0.611
HLA-G	29	0.982759	51	0.990196	aa_238I	0.611
HLA-G	29	0.982759	51	0.990196	aa_239L	0.611
HLA-G	29	0.0172414	51	0.00980392	aa_239del	0.611
HLA-G	29	0.0172414	51	0.00980392	aa_240del	0.611
HLA-G	29	0.982759	51	0.990196	aa_240T	0.611
HLA-G	29	0.982759	51	0.990196	aa_241W	0.611
HLA-G	29	0.0172414	51	0.00980392	aa_241del	0.611
HLA-G	29	0.982759	51	0.990196	aa_242Q	0.611
HLA-G	29	0.0172414	51	0.00980392	aa_242del	0.611
HLA-G	29	0.982759	51	0.990196	aa_243R	0.611
HLA-G	29	0.0172414	51	0.00980392	aa_243del	0.611
HLA-G	29	0.0172414	51	0.00980392	aa_244del	0.611
HLA-G	29	0.982759	51	0.990196	aa_244D	0.611
HLA-G	29	0.0172414	51	0.00980392	aa_245del	0.611
HLA-G	29	0.982759	51	0.990196	aa_245G	0.611
HLA-G	29	0.982759	51	0.990196	aa_246E	0.611
HLA-G	29	0.0172414	51	0.00980392	aa_246del	0.611
HLA-G	29	0.982759	51	0.990196	aa_247D	0.611
HLA-G	29	0.0172414	51	0.00980392	aa_247del	0.611
HLA-G	29	0.0172414	51	0.00980392	aa_248del	0.611
HLA-G	29	0.982759	51	0.990196	aa_248Q	0.611
HLA-G	29	0.0172414	51	0.00980392	aa_249del	0.611
HLA-G	29	0.982759	51	0.990196	aa_249T	0.611
HLA-G	29	0.0172414	51	0.00980392	aa_250del	0.611
HLA-G	29	0.982759	51	0.990196	aa_250Q	0.611
HLA-G	29	0.0172414	51	0.00980392	aa_251del	0.611
HLA-G	29	0.982759	51	0.990196	aa_251D	0.611
HLA-G	29	0.0172414	51	0.00980392	aa_252del	0.611
HLA-G	29	0.982759	51	0.990196	aa_252V	0.611
HLA-G	29	0.0172414	51	0.00980392	aa_253del	0.611
HLA-G	29	0.982759	51	0.990196	aa_253E	0.611
HLA-G	29	0.982759	51	0.990196	aa_254L	0.611
HLA-G	29	0.0172414	51	0.00980392	aa_254del	0.611
HLA-G	29	0.0172414	51	0.00980392	aa_255del	0.611
HLA-G	29	0	51	0.00980392	aa_255M	0.558
HLA-G	29	0.982759	51	0.980392	aa_255V	0.938
HLA-G	29	0.0172414	51	0.00980392	aa_256del	0.611
HLA-G	29	0.982759	51	0.990196	aa_256E	0.611
HLA-G	29	0.982759	51	0.990196	aa_257T	0.611
HLA-G	29	0.0172414	51	0.00980392	aa_257del	0.611
HLA-G	29	0.982759	51	0.990196	aa_258R	0.611
HLA-G	29	0.0172414	51	0.00980392	aa_258del	0.611
HLA-G	29	0.0172414	51	0.00980392	aa_259del	0.611
HLA-G	29	0.982759	51	0.990196	aa_259P	0.611
HLA-G	29	0.982759	51	0.990196	aa_260A	0.611
HLA-G	29	0.0172414	51	0.00980392	aa_260del	0.611
HLA-G	29	0.0172414	51	0.00980392	aa_261del	0.611
HLA-G	29	0.982759	51	0.990196	aa_261G	0.611
HLA-G	29	0.982759	51	0.990196	aa_262D	0.611
HLA-G	29	0.0172414	51	0.00980392	aa_262del	0.611
HLA-G	29	0.0172414	51	0.00980392	aa_264S	0.611
HLA-G	29	0.982759	51	0.990196	aa_264T	0.611
HLA-G	29	0.0172414	51	0.00980392	aa_265T	0.611
HLA-G	29	0.982759	51	0.990196	aa_265F	0.611
HLA-G	29	0.982759	51	0.990196	aa_266Q	0.611
HLA-G	29	0.0172414	51	0.00980392	aa_266D	0.611
HLA-G	29	0.0172414	51	0.00980392	aa_267T	0.611
HLA-G	29	0.982759	51	0.990196	aa_267K	0.611
HLA-G	29	0.982759	51	0.990196	aa_269A	0.611
HLA-G	29	0.0172414	51	0.00980392	aa_269del	0.611
HLA-G	29	0.982759	51	0.990196	aa_270A	0.611
HLA-G	29	0.0172414	51	0.00980392	aa_270del	0.611
HLA-G	29	0.982759	51	0.990196	aa_271V	0.611
HLA-G	29	0.0172414	51	0.00980392	aa_271del	0.611
HLA-G	29	0.982759	51	0.990196	aa_272V	0.611
HLA-G	29	0.0172414	51	0.00980392	aa_272del	0.611
HLA-G	29	0.0172414	51	0.00980392	aa_273del	0.611
HLA-G	29	0.982759	51	0.990196	aa_273V	0.611
HLA-G	29	0.982759	51	0.990196	aa_274P	0.611
HLA-G	29	0.0172414	51	0.00980392	aa_274del	0.611
HLA-G	29	0.982759	51	0.990196	aa_275S	0.611
HLA-G	29	0.0172414	51	0.00980392	aa_275del	0.611
HLA-G	29	0.0172414	51	0.00980392	aa_276del	0.611
HLA-G	29	0.982759	51	0.990196	aa_276G	0.611
HLA-G	29	0.0172414	51	0.00980392	aa_277R	0.611
HLA-G	29	0.982759	51	0.990196	aa_277E	0.611
HLA-G	29	0.0172414	51	0.00980392	aa_278T	0.611
HLA-G	29	0.982759	51	0.990196	aa_278E	0.611
HLA-G	29	0.0172414	51	0.00980392	aa_279G	0.611
HLA-G	29	0.982759	51	0.990196	aa_279Q	0.611
HLA-G	29	0.0172414	51	0.00980392	aa_281R	0.611
HLA-G	29	0.982759	51	0.990196	aa_281Y	0.611
HLA-G	29	0	51	0.0588235	aa_282M	0.0757
HLA-G	29	0.0172414	51	0.00980392	aa_282C	0.611
HLA-G	29	0.982759	51	0.931373	aa_282T	0.1986
HLA-G	29	0.982759	51	0.990196	aa_284H	0.611
HLA-G	29	0.0172414	51	0.00980392	aa_284del	0.611
HLA-G	29	0.982759	51	0.990196	aa_285V	0.611
HLA-G	29	0.0172414	51	0.00980392	aa_285del	0.611
HLA-G	29	0.0172414	51	0.00980392	aa_286del	0.611
HLA-G	29	0.982759	51	0.990196	aa_286Q	0.611
HLA-G	29	0.982759	51	0.990196	aa_287H	0.611
HLA-G	29	0.0172414	51	0.00980392	aa_287del	0.611
HLA-G	29	0.0172414	51	0.00980392	aa_288del	0.611
HLA-G	29	0.982759	51	0.990196	aa_288E	0.611
HLA-G	29	0.982759	51	0.990196	aa_289G	0.611
HLA-G	29	0.0172414	51	0.00980392	aa_289del	0.611
HLA-G	29	0.982759	51	0.990196	aa_290L	0.611
HLA-G	29	0.0172414	51	0.00980392	aa_290del	0.611
HLA-G	29	0.982759	51	0.990196	aa_291P	0.611
HLA-G	29	0.0172414	51	0.00980392	aa_291del	0.611
HLA-G	29	0.0172414	51	0.00980392	aa_292del	0.611
HLA-G	29	0.982759	51	0.990196	aa_292E	0.611
HLA-G	29	0.982759	51	0.990196	aa_293P	0.611
HLA-G	29	0.0172414	51	0.00980392	aa_293del	0.611
HLA-G	29	0.982759	51	0.990196	aa_294L	0.611
HLA-G	29	0.0172414	51	0.00980392	aa_294del	0.611
HLA-G	29	0.0172414	51	0.00980392	aa_295del	0.611
HLA-G	29	0.982759	51	0.990196	aa_295M	0.611
HLA-G	29	0.0172414	51	0.00980392	aa_296del	0.611
HLA-G	29	0.982759	51	0.990196	aa_296L	0.611
HLA-G	29	0.982759	51	0.990196	aa_297R	0.611
HLA-G	29	0.0172414	51	0.00980392	aa_297del	0.611
HLA-G	29	0.0172414	51	0.00980392	aa_298del	0.611
HLA-G	29	0.982759	51	0.990196	aa_298W	0.611
HLA-G	29	0.982759	51	0.990196	aa_299K	0.611
HLA-G	29	0.0172414	51	0.00980392	aa_299del	0.611
HLA-G	29	0.982759	51	0.990196	aa_300Q	0.611
HLA-G	29	0.0172414	51	0.00980392	aa_300del	0.611
HLA-G	29	0.0172414	51	0.00980392	aa_301del	0.611
HLA-G	29	0.982759	51	0.990196	aa_301S	0.611
HLA-G	29	0.982759	51	0.990196	aa_303L	0.611
HLA-G	29	0.0172414	51	0.00980392	aa_303A	0.611
HLA-G	29	0.982759	51	0.990196	aa_304P	0.611
HLA-G	29	0.0172414	51	0.00980392	aa_304R	0.611
HLA-G	29	0.982759	51	0.990196	aa_306I	0.611
HLA-G	29	0.0172414	51	0.00980392	aa_306P	0.611
HLA-G	29	0.982759	51	0.990196	aa_308I	0.611
HLA-G	29	0.0172414	51	0.00980392	aa_308del	0.611
HLA-G	29	0.982759	51	0.990196	aa_309M	0.611
HLA-G	29	0.0172414	51	0.00980392	aa_309del	0.611
HLA-G	29	0.0172414	51	0.00980392	aa_310del	0.611
HLA-G	29	0.982759	51	0.990196	aa_310G	0.611
HLA-G	29	0.0172414	51	0.00980392	aa_311del	0.611
HLA-G	29	0.982759	51	0.990196	aa_311I	0.611
HLA-G	29	0.0172414	51	0.00980392	aa_312del	0.611
HLA-G	29	0.982759	51	0.990196	aa_312V	0.611
HLA-G	29	0.0172414	51	0.00980392	aa_313del	0.611
HLA-G	29	0.982759	51	0.990196	aa_313A	0.611
HLA-G	29	0.0172414	51	0.00980392	aa_314del	0.611
HLA-G	29	0.982759	51	0.990196	aa_314G	0.611
HLA-G	29	0.982759	51	0.990196	aa_315L	0.611
HLA-G	29	0.0172414	51	0.00980392	aa_315del	0.611
HLA-G	29	0.982759	51	0.990196	aa_316V	0.611
HLA-G	29	0.0172414	51	0.00980392	aa_316del	0.611
HLA-G	29	0.982759	51	0.990196	aa_317V	0.611
HLA-G	29	0.0172414	51	0.00980392	aa_317del	0.611
HLA-G	29	0.0172414	51	0.00980392	aa_318del	0.611
HLA-G	29	0.982759	51	0.990196	aa_318L	0.611
HLA-G	29	0.982759	51	0.990196	aa_319A	0.611
HLA-G	29	0.0172414	51	0.00980392	aa_319del	0.611
HLA-G	29	0.0172414	51	0.00980392	aa_320del	0.611
HLA-G	29	0.982759	51	0.990196	aa_320A	0.611
HLA-G	29	0.0172414	51	0.00980392	aa_321del	0.611
HLA-G	29	0.982759	51	0.990196	aa_321V	0.611
HLA-G	29	0.0172414	51	0.00980392	aa_322del	0.611
HLA-G	29	0.982759	51	0.990196	aa_322V	0.611
HLA-G	29	0.982759	51	0.990196	aa_323T	0.611
HLA-G	29	0.0172414	51	0.00980392	aa_323del	0.611
HLA-G	29	0.982759	51	0.990196	aa_324G	0.611
HLA-G	29	0.0172414	51	0.00980392	aa_324del	0.611
HLA-G	29	0.0172414	51	0.00980392	aa_325del	0.611
HLA-G	29	0.982759	51	0.990196	aa_325A	0.611
HLA-G	29	0.0172414	51	0.00980392	aa_326del	0.611
HLA-G	29	0.982759	51	0.990196	aa_326A	0.611
HLA-G	29	0.982759	51	0.990196	aa_327V	0.611
HLA-G	29	0.0172414	51	0.00980392	aa_327del	0.611
HLA-G	29	0.982759	51	0.990196	aa_328A	0.611
HLA-G	29	0.0172414	51	0.00980392	aa_328del	0.611
HLA-G	29	0.0172414	51	0.00980392	aa_329del	0.611
HLA-G	29	0.982759	51	0.990196	aa_329A	0.611
HLA-G	29	0.0172414	51	0.00980392	aa_330del	0.611
HLA-G	29	0.982759	51	0.990196	aa_330V	0.611
HLA-G	29	0.0172414	51	0.00980392	aa_331del	0.611
HLA-G	29	0.982759	51	0.990196	aa_331L	0.611
HLA-G	29	0.0172414	51	0.00980392	aa_332del	0.611
HLA-G	29	0.982759	51	0.990196	aa_332W	0.611
HLA-G	29	0.0172414	51	0.00980392	aa_334H	0.611
HLA-G	29	0.982759	51	0.990196	aa_334K	0.611
HLA-G	29	0.982759	51	0.990196	aa_335K	0.611
HLA-G	29	0.0172414	51	0.00980392	aa_335T	0.611
HLA-G	29	0.982759	51	0.990196	aa_336S	0.611
HLA-G	29	0.0172414	51	0.00980392	aa_336X	0.611
HLA-G	29	0.0172414	51	0.00980392	aa_337del	0.611
HLA-G	29	0.982759	51	0.990196	aa_337S	0.611
HLA-G	29	0.0172414	51	0.00980392	aa_338del	0.611
HLA-G	29	0.982759	51	0.990196	aa_338D	0.611
HLA-G	29	0.982759	51	0.990196	aa_339X	0.611
HLA-G	29	0.0172414	51	0.00980392	aa_339del	0.611
MICA	29	0.965517	51	0.970588	aa_29R	0.742
MICA	29	0.0344828	51	0.0294118	aa_29P	0.742
MICA	29	0.775862	51	0.794118	aa_37W	0.686
MICA	29	0.224138	51	0.205882	aa_37G	0.686
MICA	29	0.0862069	51	0.0588235	aa_47T	0.567
MICA	29	0.913793	51	0.941176	aa_47A	0.567
MICA	29	0.327586	51	0.313725	aa_59C	0.77
MICA	29	0.672414	51	0.686275	aa_59Y	0.77
MICA	29	0.965517	51	0.980392	aa_114Q	0.972
MICA	29	0.0344828	51	0.0196078	aa_114R	0.972
MICA	29	0.724138	51	0.745098	aa_145L	0.944
MICA	29	0.275862	51	0.254902	aa_145V	0.944
MICA	29	0.0517241	51	0.0196078	aa_148K	0.191
MICA	29	0.948276	51	0.980392	aa_148E	0.191
MICA	29	0.672414	51	0.686275	aa_152V	0.77
MICA	29	0.327586	51	0.313725	aa_152M	0.77
MICA	29	0.0689655	51	0.0196078	aa_174V	0.0956
MICA	29	0.931034	51	0.980392	aa_174M	0.0956
MICA	29	1	51	0.990196	aa_179H	0.679
MICA	29	0	51	0.00980392	aa_179R	0.679
MICA	29	0.672414	51	0.686275	aa_196E	0.77
MICA	29	0.327586	51	0.313725	aa_196K	0.77
MICA	29	0.362069	51	0.333333	aa_198S	0.864
MICA	29	0.637931	51	0.666667	aa_198G	0.864
MICA	29	0.172414	51	0.117647	aa_204R	0.634
MICA	29	0.827586	51	0.882353	aa_204T	0.634
MICA	29	0.672414	51	0.686275	aa_229S	0.77
MICA	29	0.327586	51	0.313725	aa_229G	0.77
MICA	29	0.327586	51	0.313725	aa_233W	0.77
MICA	29	0.672414	51	0.686275	aa_233R	0.77
MICA	29	0.396552	51	0.431373	aa_236I	0.829
MICA	29	0.603448	51	0.568627	aa_236T	0.829
MICA	29	0.327586	51	0.313725	aa_238S	0.77
MICA	29	0.672414	51	0.686275	aa_238T	0.77
MICA	29	0.0517241	51	0.0294118	aa_244L	0.389
MICA	29	0.948276	51	0.970588	aa_244V	0.389
MICA	29	0.396552	51	0.431373	aa_274R	0.829
MICA	29	0.603448	51	0.568627	aa_274Q	0.829
MICA	29	1	51	0.990196	aa_279R	0.679
MICA	29	0	51	0.00980392	aa_279S	0.679
MICA	29	0.931034	51	0.980392	aa_294P	0.0956
MICA	29	0.0689655	51	0.0196078	aa_294A	0.0956
MICA	29	0.965517	51	0.980392	aa_300V	0.972
MICA	29	0.0344828	51	0.0196078	aa_300C	0.972
MICA	29	0.0344828	51	0.0196078	aa_301W	0.972
MICA	29	0.965517	51	0.980392	aa_301L	0.972
MICA	29	0.965517	51	0.980392	aa_302del	0.972
MICA	29	0.0344828	51	0.0196078	aa_302C	0.972
MICA	29	0.0344828	51	0.0196078	aa_303F	0.972
MICA	29	0.965517	51	0.980392	aa_303del	0.972
MICA	29	0.965517	51	0.980392	aa_304del	0.972
MICA	29	0.0344828	51	0.0196078	aa_304R	0.972
MICA	29	0.0344828	51	0.0196078	aa_306I	0.972
MICA	29	0.965517	51	0.980392	aa_306L	0.972
MICA	29	0.0344828	51	0.0196078	aa_307G	0.972
MICA	29	0.965517	51	0.980392	aa_307Q	0.972
MICA	29	0.0344828	51	0.0196078	aa_308R	0.972
MICA	29	0.965517	51	0.980392	aa_308S	0.972
MICA	29	0.965517	51	0.980392	aa_310W	0.972
MICA	29	0.0344828	51	0.0196078	aa_310del	0.972
MICA	29	0.965517	51	0.980392	aa_311Q	0.972
MICA	29	0.0344828	51	0.0196078	aa_311S	0.972
MICA	29	0.965517	51	0.980392	aa_312T	0.972
MICA	29	0.0344828	51	0.0196078	aa_312M	0.972
MICA	29	0.0344828	51	0.0196078	aa_314L	0.972
MICA	29	0.965517	51	0.980392	aa_314H	0.972
MICA	29	0.965517	51	0.980392	aa_315V	0.972
MICA	29	0.0344828	51	0.0196078	aa_315L	0.972
MICA	29	0.0344828	51	0.0196078	aa_316L	0.972
MICA	29	0.965517	51	0.980392	aa_316S	0.972
MICA	29	0.965517	51	0.980392	aa_317A	0.972
MICA	29	0.0344828	51	0.0196078	aa_317L	0.972
MICA	29	0.965517	51	0.980392	aa_318V	0.972
MICA	29	0.0344828	51	0.0196078	aa_318L	0.972
MICA	29	0.87931	51	0.843137	aa_319del	0.819
MICA	29	0.12069	51	0.156863	aa_319A	0.819
MICA	29	0.12069	51	0.156863	aa_320A	0.819
MICA	29	0.87931	51	0.843137	aa_320del	0.819
MICA	29	0.12069	51	0.156863	aa_321A	0.819
MICA	29	0.87931	51	0.843137	aa_321del	0.819
MICA	29	0.5	51	0.539216	aa_322del	0.767
MICA	29	0.465517	51	0.441176	aa_322A	0.779
MICA	29	0.0344828	51	0.0196078	aa_322L	0.972
MICA	29	0.0344828	51	0.0196078	aa_323L	0.972
MICA	29	0.103448	51	0.107843	aa_323del	0.898
MICA	29	0.862069	51	0.872549	aa_323A	0.921
MICA	29	0.0344828	51	0.0196078	aa_324L	0.972
MICA	29	0.965517	51	0.980392	aa_324A	0.972
MICA	29	0.275862	51	0.352941	aa_325G	0.347
MICA	29	0.689655	51	0.627451	aa_325A	0.369
MICA	29	0.0344828	51	0.0196078	aa_325L	0.972
MICA	29	0.275862	51	0.352941	aa_326C	0.347
MICA	29	0.689655	51	0.627451	aa_326A	0.369
MICA	29	0.0344828	51	0.0196078	aa_326L	0.972
MICA	29	0.0344828	51	0.0196078	aa_327L	0.972
MICA	29	0.275862	51	0.352941	aa_327C	0.347
MICA	29	0.689655	51	0.627451	aa_327A	0.369
MICA	29	0.689655	51	0.627451	aa_328I	0.369
MICA	29	0.275862	51	0.352941	aa_328Y	0.347
MICA	29	0.0344828	51	0.0196078	aa_328L	0.972
MICA	29	0.275862	51	0.352941	aa_330C	0.347
MICA	29	0.0344828	51	0.0196078	aa_330L	0.972
MICA	29	0.689655	51	0.627451	aa_330V	0.369
MICA	29	0.0344828	51	0.0196078	aa_331L	0.972
MICA	29	0.275862	51	0.352941	aa_331del	0.347
MICA	29	0.689655	51	0.627451	aa_331I	0.369
MICA	29	0.0344828	51	0.0196078	aa_332L	0.972
MICA	29	0.689655	51	0.627451	aa_332I	0.369
MICA	29	0.275862	51	0.352941	aa_332del	0.347
MICA	29	0.0344828	51	0.0196078	aa_333L	0.972
MICA	29	0.275862	51	0.352941	aa_333Y	0.347
MICA	29	0.689655	51	0.627451	aa_333I	0.369
MICA	29	0.724138	51	0.647059	aa_334F	0.347
MICA	29	0.275862	51	0.352941	aa_334Y	0.347
MICA	29	0.965517	51	0.980392	aa_335Y	0.972
MICA	29	0.0344828	51	0.0196078	aa_335S	0.972
MICA	29	0.0344828	51	0.0196078	aa_336T	0.972
MICA	29	0.689655	51	0.627451	aa_336V	0.369
MICA	29	0.275862	51	0.352941	aa_336F	0.347
MICA	29	0.275862	51	0.352941	aa_337L	0.347
MICA	29	0.5	51	0.431373	aa_337R	0.572
MICA	29	0.0344828	51	0.0196078	aa_337del	0.972
MICA	29	0.189655	51	0.196078	aa_337C	0.735
MICA	29	0.965517	51	0.980392	aa_338C	0.972
MICA	29	0.0344828	51	0.0196078	aa_338del	0.972
MICA	29	0.310345	51	0.372549	aa_339del	0.369
MICA	29	0.689655	51	0.627451	aa_339C	0.369
MICA	29	0.689655	51	0.627451	aa_340K	0.369
MICA	29	0.310345	51	0.372549	aa_340del	0.369
MICA	29	0.310345	51	0.372549	aa_341del	0.369
MICA	29	0.689655	51	0.627451	aa_341K	0.369
MICA	29	0.689655	51	0.627451	aa_342K	0.369
MICA	29	0.310345	51	0.372549	aa_342del	0.369
MICA	29	0.689655	51	0.627451	aa_343T	0.369
MICA	29	0.310345	51	0.372549	aa_343del	0.369
MICA	29	0.310345	51	0.372549	aa_344del	0.369
MICA	29	0.689655	51	0.627451	aa_344S	0.369
MICA	29	0.689655	51	0.627451	aa_345A	0.369
MICA	29	0.310345	51	0.372549	aa_345del	0.369
MICA	29	0.310345	51	0.372549	aa_346del	0.369
MICA	29	0.689655	51	0.627451	aa_346A	0.369
MICA	29	0.310345	51	0.372549	aa_347del	0.369
MICA	29	0.689655	51	0.627451	aa_347E	0.369
MICA	29	0.689655	51	0.627451	aa_348G	0.369
MICA	29	0.310345	51	0.372549	aa_348del	0.369
MICA	29	0.310345	51	0.372549	aa_349del	0.369
MICA	29	0.689655	51	0.627451	aa_349P	0.369
MICA	29	0.310345	51	0.372549	aa_350del	0.369
MICA	29	0.689655	51	0.627451	aa_350E	0.369
MICA	29	0.689655	51	0.627451	aa_351L	0.369
MICA	29	0.310345	51	0.372549	aa_351del	0.369
MICA	29	0.310345	51	0.372549	aa_352del	0.369
MICA	29	0.689655	51	0.627451	aa_352V	0.369
MICA	29	0.275862	51	0.352941	aa_353del	0.347
MICA	29	0.724138	51	0.647059	aa_353S	0.347
MICA	29	0.275862	51	0.352941	aa_354del	0.347
MICA	29	0.689655	51	0.627451	aa_354L	0.369
MICA	29	0.0344828	51	0.0196078	aa_354V	0.972
MICA	29	0.275862	51	0.352941	aa_355del	0.347
MICA	29	0.689655	51	0.627451	aa_355Q	0.369
MICA	29	0.0344828	51	0.0196078	aa_355V	0.972
MICA	29	0.275862	51	0.352941	aa_356del	0.347
MICA	29	0.724138	51	0.647059	aa_356V	0.347
MICA	29	0.275862	51	0.352941	aa_357del	0.347
MICA	29	0.0344828	51	0.0196078	aa_357R	0.972
MICA	29	0.689655	51	0.627451	aa_357L	0.369
MICA	29	0.689655	51	0.627451	aa_358D	0.369
MICA	29	0.0344828	51	0.0196078	aa_358R	0.972
MICA	29	0.275862	51	0.352941	aa_358del	0.347
MICA	29	0.275862	51	0.352941	aa_359del	0.347
MICA	29	0.689655	51	0.627451	aa_359Q	0.369
MICA	29	0.0344828	51	0.0196078	aa_359K	0.972
MICA	29	0.275862	51	0.352941	aa_360del	0.347
MICA	29	0.724138	51	0.647059	aa_360H	0.347
MICA	29	0.0344828	51	0.0196078	aa_361Q	0.972
MICA	29	0.275862	51	0.352941	aa_361del	0.347
MICA	29	0.689655	51	0.627451	aa_361P	0.369
MICA	29	0.310345	51	0.372549	aa_362del	0.369
MICA	29	0.689655	51	0.627451	aa_362V	0.369
MICA	29	0.310345	51	0.372549	aa_363del	0.369
MICA	29	0.689655	51	0.627451	aa_363G	0.369
MICA	29	0.310345	51	0.372549	aa_364del	0.369
MICA	29	0.672414	51	0.607843	aa_364T	0.348
MICA	29	0.0172414	51	0.0196078	aa_364M	0.795
MICA	29	0.310345	51	0.372549	aa_365del	0.369
MICA	29	0.689655	51	0.627451	aa_365S	0.369
MICA	29	0.689655	51	0.627451	aa_366D	0.369
MICA	29	0.310345	51	0.372549	aa_366del	0.369
MICA	29	0.689655	51	0.627451	aa_367H	0.369
MICA	29	0.310345	51	0.372549	aa_367del	0.369
MICA	29	0.689655	51	0.627451	aa_368R	0.369
MICA	29	0.310345	51	0.372549	aa_368del	0.369
MICA	29	0.689655	51	0.627451	aa_369D	0.369
MICA	29	0.310345	51	0.372549	aa_369del	0.369
MICA	29	0.310345	51	0.372549	aa_370del	0.369
MICA	29	0.689655	51	0.627451	aa_370A	0.369
MICA	29	0.310345	51	0.372549	aa_371del	0.369
MICA	29	0.689655	51	0.627451	aa_371T	0.369
MICA	29	0.689655	51	0.627451	aa_372Q	0.369
MICA	29	0.310345	51	0.372549	aa_372del	0.369
MICA	29	0.310345	51	0.372549	aa_373del	0.369
MICA	29	0.689655	51	0.627451	aa_373L	0.369
MICA	29	0.310345	51	0.372549	aa_374del	0.369
MICA	29	0.689655	51	0.627451	aa_374G	0.369
MICA	29	0.0344828	51	0.0196078	aa_375L	0.972
MICA	29	0.689655	51	0.627451	aa_375F	0.369
MICA	29	0.275862	51	0.352941	aa_375del	0.347
MICA	29	0.275862	51	0.352941	aa_376del	0.347
MICA	29	0.724138	51	0.647059	aa_376Q	0.347
MICA	29	0.0344828	51	0.0196078	aa_377R	0.972
MICA	29	0.965517	51	0.980392	aa_377P	0.972
MICA	29	0.0344828	51	0.0196078	aa_378V	0.972
MICA	29	0.965517	51	0.980392	aa_378L	0.972
MICA	29	0.0344828	51	0.0196078	aa_379Q	0.972
MICA	29	0.689655	51	0.627451	aa_379M	0.369
MICA	29	0.275862	51	0.352941	aa_379L	0.347
MICA	29	0.275862	51	0.352941	aa_380X	0.347
MICA	29	0.724138	51	0.647059	aa_380S	0.347
MICA	29	0.241379	51	0.27451	aa_381D	0.894
MICA	29	0.275862	51	0.352941	aa_381del	0.347
MICA	29	0.0344828	51	0.0196078	aa_381S	0.972
MICA	29	0.448276	51	0.352941	aa_381A	0.276
MICA	29	0.689655	51	0.627451	aa_382L	0.369
MICA	29	0.0344828	51	0.0196078	aa_382X	0.972
MICA	29	0.275862	51	0.352941	aa_382del	0.347
MICA	29	0.310345	51	0.372549	aa_383del	0.369
MICA	29	0.689655	51	0.627451	aa_383G	0.369
MICA	29	0.310345	51	0.372549	aa_384del	0.369
MICA	29	0.689655	51	0.627451	aa_384S	0.369
MICA	29	0.310345	51	0.372549	aa_385del	0.369
MICA	29	0.655172	51	0.607843	aa_385T	0.514
MICA	29	0.0344828	51	0.0196078	aa_385A	0.497
MICA	29	0.310345	51	0.372549	aa_386del	0.369
MICA	29	0.689655	51	0.627451	aa_386G	0.369
MICA	29	0.310345	51	0.372549	aa_387del	0.369
MICA	29	0.689655	51	0.627451	aa_387S	0.369
MICA	29	0.310345	51	0.372549	aa_388del	0.369
MICA	29	0.689655	51	0.627451	aa_388T	0.369
MICA	29	0.689655	51	0.627451	aa_389E	0.369
MICA	29	0.310345	51	0.372549	aa_389del	0.369
MICA	29	0.310345	51	0.372549	aa_390del	0.369
MICA	29	0.689655	51	0.627451	aa_390G	0.369
MICA	29	0.0862069	51	0.0490196	aa_391T	0.48
MICA	29	0.310345	51	0.372549	aa_391del	0.369
MICA	29	0.603448	51	0.578431	aa_391A	0.594
MICA	29	0.689655	51	0.627451	aa_392X	0.369
MICA	29	0.310345	51	0.372549	aa_392del	0.369
MICB	29	0.982759	51	0.990196	aa_55P	0.608
MICB	29	0.0172414	51	0.00980392	aa_55S	0.608
MICB	29	0.931034	51	0.784314	aa_75D	0.0128
MICB	29	0.0689655	51	0.215686	aa_75N	0.0128
MICB	29	0.189655	51	0.303922	aa_80E	0.179
MICB	29	0.810345	51	0.696078	aa_80K	0.1793
MICB	29	0.0689655	51	0.0980392	aa_121M	0.557
MICB	29	0.931034	51	0.901961	aa_121I	0.557
MICB	29	0.810345	51	0.696078	aa_136D	0.1793
MICB	29	0.189655	51	0.303922	aa_136N	0.179
MICB	29	0.982759	51	0.980392	aa_193R	0.2708
MICB	29	0.0172414	51	0.0196078	aa_193X	0.2708
MICB	29	0.0172414	51	0.0196078	aa_194del	0.2708
MICB	29	0.982759	51	0.980392	aa_194Y	0.2708
MICB	29	0.0172414	51	0.0196078	aa_195del	0.2708
MICB	29	0.982759	51	0.980392	aa_195L	0.2708
MICB	29	0.0172414	51	0.0196078	aa_196del	0.2708
MICB	29	0.982759	51	0.980392	aa_196K	0.2708
MICB	29	0.982759	51	0.980392	aa_197S	0.2708
MICB	29	0.0172414	51	0.0196078	aa_197del	0.2708
MICB	29	0.982759	51	0.980392	aa_198G	0.2708
MICB	29	0.0172414	51	0.0196078	aa_198del	0.2708
MICB	29	0.982759	51	0.980392	aa_199V	0.2708
MICB	29	0.0172414	51	0.0196078	aa_199del	0.2708
MICB	29	0.982759	51	0.980392	aa_200A	0.2708
MICB	29	0.0172414	51	0.0196078	aa_200del	0.2708
MICB	29	0.982759	51	0.980392	aa_201I	0.2708
MICB	29	0.0172414	51	0.0196078	aa_201del	0.2708
MICB	29	0.982759	51	0.980392	aa_202R	0.2708
MICB	29	0.0172414	51	0.0196078	aa_202del	0.2708
MICB	29	0.982759	51	0.980392	aa_203R	0.2708
MICB	29	0.0172414	51	0.0196078	aa_203del	0.2708
MICB	29	0.982759	51	0.980392	aa_204T	0.2708
MICB	29	0.0172414	51	0.0196078	aa_204del	0.2708
MICB	29	0.982759	51	0.980392	aa_205V	0.2708
MICB	29	0.0172414	51	0.0196078	aa_205del	0.2708
MICB	29	0.982759	51	0.980392	aa_206P	0.2708
MICB	29	0.0172414	51	0.0196078	aa_206del	0.2708
MICB	29	0.0172414	51	0.0196078	aa_207del	0.2708
MICB	29	0.982759	51	0.980392	aa_207P	0.2708
MICB	29	0.0172414	51	0.0196078	aa_208del	0.2708
MICB	29	0.982759	51	0.980392	aa_208M	0.2708
MICB	29	0.0172414	51	0.0196078	aa_209del	0.2708
MICB	29	0.982759	51	0.980392	aa_209V	0.2708
MICB	29	0.982759	51	0.980392	aa_210N	0.2708
[truncated: 416 more rows]

## Sheet: Covid-19+women Covid-19-women 
Gene	N(Covid-19[-] women)	Frequency(Covid-19[-] women)	N(Covid-19[+] women)	Frequency(Covid-19[+] women)	aa_residue	P-value
HLA-A	54	0.546296	32	0.40625	aa_10V	0.0354
HLA-A	54	0.453704	32	0.59375	aa_10L	0.0354
HLA-A	54	0.824074	32	0.78125	aa_14S	0.4206
HLA-A	54	0.175926	32	0.21875	aa_14L	0.4206
HLA-A	54	0.990741	32	1	aa_23W	0.368
HLA-A	54	0.00925926	32	0	aa_23R	0.36779
HLA-A	54	0.12037	32	0.109375	aa_33T	0.8986
HLA-A	54	0.490741	32	0.515625	aa_33F	0.5874
HLA-A	54	0.240741	32	0.125	aa_33S	0.14077
HLA-A	54	0.148148	32	0.25	aa_33Y	0.2695
HLA-A	54	0.00925926	32	0.015625	aa_36M	0.8135
HLA-A	54	0.990741	32	0.984375	aa_36V	0.813
HLA-A	54	0.037037	32	0.046875	aa_41S	0.4964
HLA-A	54	0.962963	32	0.953125	aa_41R	0.4964
HLA-A	54	0	32	0.015625	aa_67R	0.09708
HLA-A	54	1	32	0.984375	aa_67Q	0.0971
HLA-A	54	0.87963	32	0.921875	aa_68R	0.414
HLA-A	54	0.12037	32	0.078125	aa_68K	0.4137
HLA-A	54	0.0740741	32	0.09375	aa_80R	0.4184
HLA-A	54	0.925926	32	0.90625	aa_80G	0.4184
HLA-A	54	0.240741	32	0.21875	aa_86G	0.9423
HLA-A	54	0.37037	32	0.53125	aa_86Q	0.0105
HLA-A	54	0.203704	32	0.078125	aa_86E	0.0497
HLA-A	54	0.0740741	32	0.0625	aa_86L	0.8872
HLA-A	54	0.111111	32	0.109375	aa_86R	0.29211
HLA-A	54	0.111111	32	0.109375	aa_87N	0.29211
HLA-A	54	0.814815	32	0.828125	aa_87E	0.366
HLA-A	54	0.0740741	32	0.0625	aa_87Q	0.8872
HLA-A	54	0.796296	32	0.921875	aa_89R	0.0497
HLA-A	54	0.203704	32	0.078125	aa_89G	0.0497
HLA-A	54	0.555556	32	0.703125	aa_90N	0.1167
HLA-A	54	0.444444	32	0.296875	aa_90K	0.11672
HLA-A	54	0.87963	32	0.921875	aa_91V	0.414
HLA-A	54	0.12037	32	0.078125	aa_91M	0.4137
HLA-A	54	0.740741	32	0.609375	aa_94H	0.10233
HLA-A	54	0.259259	32	0.390625	aa_94Q	0.1023
HLA-A	54	0.953704	32	0.953125	aa_97T	0.98
HLA-A	54	0.0462963	32	0.046875	aa_97I	0.9795
HLA-A	54	0.759259	32	0.78125	aa_98D	0.9423
HLA-A	54	0.240741	32	0.21875	aa_98H	0.9423
HLA-A	54	0.231481	32	0.171875	aa_100A	0.34191
HLA-A	54	0.287037	32	0.234375	aa_100E	0.6601
HLA-A	54	0.481481	32	0.59375	aa_100V	0.221
HLA-A	54	0.481481	32	0.59375	aa_101D	0.221
HLA-A	54	0.0740741	32	0.109375	aa_101S	0.4348
HLA-A	54	0.444444	32	0.296875	aa_101N	0.09736
HLA-A	54	0.722222	32	0.8125	aa_103G	0.2754
HLA-A	54	0.277778	32	0.1875	aa_103R	0.27543
HLA-A	54	0.277778	32	0.1875	aa_104I	0.27543
HLA-A	54	0.722222	32	0.8125	aa_104T	0.2754
HLA-A	54	0.277778	32	0.1875	aa_105A	0.27543
HLA-A	54	0.722222	32	0.8125	aa_105L	0.2754
HLA-A	54	0.277778	32	0.1875	aa_106L	0.27543
HLA-A	54	0.722222	32	0.8125	aa_106R	0.2754
HLA-A	54	0.277778	32	0.1875	aa_107R	0.27543
HLA-A	54	0.722222	32	0.8125	aa_107G	0.2754
HLA-A	54	0.768519	32	0.734375	aa_114A	0.8643
HLA-A	54	0.231481	32	0.265625	aa_114D	0.8643
HLA-A	54	0.555556	32	0.703125	aa_119I	0.1167
HLA-A	54	0.240741	32	0.203125	aa_119V	0.70084
HLA-A	54	0.203704	32	0.09375	aa_119L	0.10887
HLA-A	54	0.416667	32	0.34375	aa_121M	0.44595
HLA-A	54	0.277778	32	0.390625	aa_121I	0.0815
HLA-A	54	0.305556	32	0.265625	aa_121R	0.4174
HLA-A	54	0.203704	32	0.078125	aa_123F	0.0497
HLA-A	54	0.796296	32	0.921875	aa_123Y	0.0497
HLA-A	54	0.296296	32	0.375	aa_129P	0.4041
HLA-A	54	0.703704	32	0.625	aa_129S	0.40413
HLA-A	54	0.759259	32	0.78125	aa_131G	0.9423
HLA-A	54	0.240741	32	0.21875	aa_131W	0.9423
HLA-A	54	0.0555556	32	0.109375	aa_133L	0.174
HLA-A	54	0.944444	32	0.890625	aa_133F	0.17399
HLA-A	54	0.453704	32	0.3125	aa_138H	0.13457
HLA-A	54	0.037037	32	0.046875	aa_138E	0.4964
HLA-A	54	0.342593	32	0.453125	aa_138R	0.1548
HLA-A	54	0.166667	32	0.1875	aa_138Q	0.9505
HLA-A	54	0.509259	32	0.640625	aa_140D	0.2274
HLA-A	54	0.453704	32	0.3125	aa_140Y	0.13457
HLA-A	54	0.037037	32	0.046875	aa_140H	0.4964
HLA-A	54	0.518519	32	0.640625	aa_151N	0.1694
HLA-A	54	0.481481	32	0.359375	aa_151K	0.16939
HLA-A	54	0.277778	32	0.28125	aa_166T	0.8994
HLA-A	54	0.722222	32	0.71875	aa_166I	0.8994
HLA-A	54	0.37963	32	0.3125	aa_168Q	0.29505
HLA-A	54	0.62037	32	0.6875	aa_168K	0.2951
HLA-A	54	0.277778	32	0.28125	aa_169H	0.8994
HLA-A	54	0.722222	32	0.71875	aa_169R	0.8994
HLA-A	54	0.0648148	32	0.046875	aa_173T	0.18753
HLA-A	54	0.935185	32	0.953125	aa_173A	0.1875
HLA-A	54	0.87963	32	0.921875	aa_174A	0.414
HLA-A	54	0.12037	32	0.078125	aa_174V	0.4137
HLA-A	54	0.685185	32	0.765625	aa_175H	0.3487
HLA-A	54	0.314815	32	0.234375	aa_175R	0.34868
HLA-A	54	0.12963	32	0.140625	aa_176E	0.62671
HLA-A	54	0.0277778	32	0	aa_176W	0.2292
HLA-A	54	0.666667	32	0.59375	aa_176V	0.51442
HLA-A	54	0.00925926	32	0.03125	aa_176R	0.2038
HLA-A	54	0.166667	32	0.234375	aa_176A	0.1877
HLA-A	54	0.62037	32	0.546875	aa_180L	0.41334
HLA-A	54	0.0925926	32	0.125	aa_180W	0.9097
HLA-A	54	0.12037	32	0.078125	aa_180R	0.4137
HLA-A	54	0.166667	32	0.25	aa_180Q	0.1458
HLA-A	54	0.12037	32	0.078125	aa_182V	0.4137
HLA-A	54	0.87963	32	0.921875	aa_182A	0.414
HLA-A	54	0.925926	32	0.890625	aa_185E	0.5927
HLA-A	54	0.0740741	32	0.109375	aa_185D	0.5927
HLA-A	54	0.231481	32	0.265625	aa_187R	0.7984
HLA-A	54	0.768519	32	0.734375	aa_187T	0.7984
HLA-A	54	0.314815	32	0.15625	aa_190D	0.02495
HLA-A	54	0.685185	32	0.84375	aa_190E	0.0249
HLA-A	54	0.314815	32	0.15625	aa_191G	0.02495
HLA-A	54	0.685185	32	0.84375	aa_191W	0.0249
HLA-A	54	0.990741	32	1	aa_195Y	0.257
HLA-A	54	0.00925926	32	0	aa_195H	0.25698
HLA-A	54	0.435185	32	0.484375	aa_208A	0.6553
HLA-A	54	0.564815	32	0.515625	aa_208P	0.6553
HLA-A	54	0.00925926	32	0	aa_210del	0.4328
HLA-A	54	0.00925926	32	0	aa_210R	0.25698
HLA-A	54	0.981481	32	1	aa_210K	0.172
HLA-A	54	0.990741	32	1	aa_211T	0.433
HLA-A	54	0.00925926	32	0	aa_211del	0.4328
HLA-A	54	0.00925926	32	0	aa_212del	0.4328
HLA-A	54	0.990741	32	1	aa_212H	0.433
HLA-A	54	0.00925926	32	0	aa_213del	0.4328
HLA-A	54	0.990741	32	1	aa_213M	0.433
HLA-A	54	0.990741	32	1	aa_214T	0.433
HLA-A	54	0.00925926	32	0	aa_214del	0.4328
HLA-A	54	0.990741	32	1	aa_215H	0.433
HLA-A	54	0.00925926	32	0	aa_215del	0.4328
HLA-A	54	0.990741	32	1	aa_216H	0.433
HLA-A	54	0.00925926	32	0	aa_216del	0.4328
HLA-A	54	0.490741	32	0.515625	aa_217A	0.8849
HLA-A	54	0.00925926	32	0	aa_217del	0.4328
HLA-A	54	0.5	32	0.484375	aa_217P	0.9869
HLA-A	54	0.490741	32	0.515625	aa_218V	0.8849
HLA-A	54	0.5	32	0.484375	aa_218I	0.9869
HLA-A	54	0.00925926	32	0	aa_218del	0.4328
HLA-A	54	0.990741	32	1	aa_219S	0.433
HLA-A	54	0.00925926	32	0	aa_219del	0.4328
HLA-A	54	0.990741	32	1	aa_220D	0.433
HLA-A	54	0.00925926	32	0	aa_220del	0.4328
HLA-A	54	0.00925926	32	0	aa_221del	0.4328
HLA-A	54	0.990741	32	1	aa_221H	0.433
HLA-A	54	0.00925926	32	0	aa_222del	0.4328
HLA-A	54	0.990741	32	1	aa_222E	0.433
HLA-A	54	0.990741	32	1	aa_223A	0.433
HLA-A	54	0.00925926	32	0	aa_223del	0.4328
HLA-A	54	0.990741	32	1	aa_224T	0.433
HLA-A	54	0.00925926	32	0	aa_224del	0.4328
HLA-A	54	0.990741	32	1	aa_225L	0.433
HLA-A	54	0.00925926	32	0	aa_225del	0.4328
HLA-A	54	0.990741	32	1	aa_226R	0.433
HLA-A	54	0.00925926	32	0	aa_226del	0.4328
HLA-A	54	0.00925926	32	0	aa_227del	0.4328
HLA-A	54	0.990741	32	1	aa_227C	0.433
HLA-A	54	0.00925926	32	0	aa_228del	0.4328
HLA-A	54	0.990741	32	1	aa_228W	0.433
HLA-A	54	0.990741	32	1	aa_229A	0.433
HLA-A	54	0.00925926	32	0	aa_229del	0.4328
HLA-A	54	0.990741	32	1	aa_230L	0.433
HLA-A	54	0.00925926	32	0	aa_230del	0.4328
HLA-A	54	0.490741	32	0.546875	aa_231S	0.5359
HLA-A	54	0.00925926	32	0	aa_231del	0.4328
HLA-A	54	0.5	32	0.453125	aa_231G	0.6303
HLA-A	54	0.990741	32	1	aa_232F	0.433
HLA-A	54	0.00925926	32	0	aa_232del	0.4328
HLA-A	54	0.00925926	32	0	aa_233del	0.4328
HLA-A	54	0.990741	32	1	aa_233Y	0.433
HLA-A	54	0.990741	32	1	aa_234P	0.433
HLA-A	54	0.00925926	32	0	aa_234del	0.4328
HLA-A	54	0.990741	32	1	aa_235A	0.433
HLA-A	54	0.00925926	32	0	aa_235del	0.4328
HLA-A	54	0.00925926	32	0	aa_236del	0.4328
HLA-A	54	0.990741	32	1	aa_236E	0.433
HLA-A	54	0.00925926	32	0	aa_237del	0.4328
HLA-A	54	0.990741	32	1	aa_237I	0.433
HLA-A	54	0.990741	32	1	aa_238T	0.433
HLA-A	54	0.00925926	32	0	aa_238del	0.4328
HLA-A	54	0.00925926	32	0	aa_239del	0.4328
HLA-A	54	0.990741	32	1	aa_239L	0.433
HLA-A	54	0.00925926	32	0	aa_240del	0.4328
HLA-A	54	0.990741	32	1	aa_240T	0.433
HLA-A	54	0.990741	32	1	aa_241W	0.433
HLA-A	54	0.00925926	32	0	aa_241del	0.4328
HLA-A	54	0.990741	32	1	aa_242Q	0.433
HLA-A	54	0.00925926	32	0	aa_242del	0.4328
HLA-A	54	0.00925926	32	0	aa_243del	0.4328
HLA-A	54	0.990741	32	1	aa_243R	0.433
HLA-A	54	0.00925926	32	0	aa_244del	0.4328
HLA-A	54	0.990741	32	1	aa_244D	0.433
HLA-A	54	0.990741	32	1	aa_245G	0.433
HLA-A	54	0.00925926	32	0	aa_245del	0.4328
HLA-A	54	0.00925926	32	0	aa_246del	0.4328
HLA-A	54	0.990741	32	1	aa_246E	0.433
HLA-A	54	0.990741	32	1	aa_247D	0.433
HLA-A	54	0.00925926	32	0	aa_247del	0.4328
HLA-A	54	0.990741	32	1	aa_248Q	0.433
HLA-A	54	0.00925926	32	0	aa_248del	0.4328
HLA-A	54	0.00925926	32	0	aa_249del	0.4328
HLA-A	54	0.990741	32	1	aa_249T	0.433
HLA-A	54	0.990741	32	1	aa_253E	0.433
HLA-A	54	0.00925926	32	0	aa_253del	0.4328
HLA-A	54	0.00925926	32	0	aa_254del	0.4328
HLA-A	54	0.990741	32	1	aa_254L	0.433
HLA-A	54	0.00925926	32	0	aa_255del	0.4328
HLA-A	54	0.990741	32	1	aa_255V	0.433
HLA-A	54	0.00925926	32	0	aa_256del	0.4328
HLA-A	54	0.990741	32	1	aa_256E	0.433
HLA-A	54	0.00925926	32	0	aa_257del	0.4328
HLA-A	54	0.990741	32	1	aa_257T	0.433
HLA-A	54	0.990741	32	1	aa_258R	0.433
HLA-A	54	0.00925926	32	0	aa_258del	0.4328
HLA-A	54	0.990741	32	1	aa_259P	0.433
HLA-A	54	0.00925926	32	0	aa_259del	0.4328
HLA-A	54	0.990741	32	1	aa_260A	0.433
HLA-A	54	0.00925926	32	0	aa_260del	0.4328
HLA-A	54	0.00925926	32	0	aa_261del	0.4328
HLA-A	54	0.990741	32	1	aa_261G	0.433
HLA-A	54	0.00925926	32	0	aa_262del	0.4328
HLA-A	54	0.990741	32	1	aa_262D	0.433
HLA-A	54	0.990741	32	1	aa_263G	0.433
HLA-A	54	0.00925926	32	0	aa_263del	0.4328
HLA-A	54	0.00925926	32	0	aa_264del	0.4328
HLA-A	54	0.990741	32	1	aa_264T	0.433
HLA-A	54	0.990741	32	1	aa_265F	0.433
HLA-A	54	0.00925926	32	0	aa_265del	0.4328
HLA-A	54	0.00925926	32	0	aa_266del	0.4328
HLA-A	54	0.990741	32	1	aa_266Q	0.433
HLA-A	54	0.990741	32	1	aa_267K	0.433
HLA-A	54	0.00925926	32	0	aa_267del	0.4328
HLA-A	54	0.990741	32	1	aa_268W	0.433
HLA-A	54	0.00925926	32	0	aa_268del	0.4328
HLA-A	54	0.037037	32	0.0625	aa_269V	0.6817
HLA-A	54	0.00925926	32	0	aa_269del	0.4328
HLA-A	54	0.953704	32	0.9375	aa_269A	0.915
HLA-A	54	0.00925926	32	0	aa_270del	0.4328
HLA-A	54	0.777778	32	0.75	aa_270A	0.927
HLA-A	54	0.212963	32	0.25	aa_270S	0.8119
HLA-A	54	0.990741	32	1	aa_271V	0.433
HLA-A	54	0.00925926	32	0	aa_271del	0.4328
HLA-A	54	0.00925926	32	0	aa_272del	0.4328
HLA-A	54	0.990741	32	1	aa_272V	0.433
HLA-A	54	0.00925926	32	0	aa_273del	0.4328
HLA-A	54	0.990741	32	1	aa_273V	0.433
HLA-A	54	0.00925926	32	0	aa_274del	0.4328
HLA-A	54	0.990741	32	1	aa_274P	0.433
HLA-A	54	0.990741	32	1	aa_275S	0.433
HLA-A	54	0.00925926	32	0	aa_275del	0.4328
HLA-A	54	0.990741	32	1	aa_276G	0.433
HLA-A	54	0.00925926	32	0	aa_276del	0.4328
HLA-A	54	0.481481	32	0.4375	aa_277E	0.686
HLA-A	54	0.509259	32	0.5625	aa_277Q	0.598
HLA-A	54	0.00925926	32	0	aa_277del	0.4328
HLA-A	54	0.00925926	32	0	aa_278del	0.4328
HLA-A	54	0.990741	32	1	aa_278E	0.433
HLA-A	54	0.990741	32	1	aa_279Q	0.433
HLA-A	54	0.00925926	32	0	aa_279del	0.4328
HLA-A	54	0.00925926	32	0	aa_280del	0.4328
HLA-A	54	0.990741	32	1	aa_280R	0.433
HLA-A	54	0.990741	32	1	aa_282T	0.433
HLA-A	54	0.00925926	32	0	aa_282D	0.4328
HLA-A	54	0.990741	32	1	aa_283C	0.433
HLA-A	54	0.00925926	32	0	aa_283del	0.4328
HLA-A	54	0.00925926	32	0	aa_284del	0.4328
HLA-A	54	0.990741	32	1	aa_284H	0.433
HLA-A	54	0.00925926	32	0	aa_285del	0.4328
HLA-A	54	0.990741	32	1	aa_285V	0.433
HLA-A	54	0.990741	32	1	aa_286Q	0.433
HLA-A	54	0.00925926	32	0	aa_286del	0.4328
HLA-A	54	0.990741	32	1	aa_287H	0.433
HLA-A	54	0.00925926	32	0	aa_287del	0.4328
HLA-A	54	0.990741	32	1	aa_288E	0.433
HLA-A	54	0.00925926	32	0	aa_288del	0.4328
HLA-A	54	0.990741	32	1	aa_289G	0.433
HLA-A	54	0.00925926	32	0	aa_289del	0.4328
HLA-A	54	0.990741	32	1	aa_290L	0.433
HLA-A	54	0.00925926	32	0	aa_290del	0.4328
HLA-A	54	0.00925926	32	0	aa_292P	0.4328
HLA-A	54	0.990741	32	1	aa_292K	0.433
HLA-A	54	0.00925926	32	0	aa_294H	0.4328
HLA-A	54	0.990741	32	1	aa_294L	0.433
HLA-A	54	0.00925926	32	0	aa_295L	0.4328
HLA-A	54	0.990741	32	1	aa_295T	0.433
HLA-A	54	0.990741	32	1	aa_296L	0.433
HLA-A	54	0.00925926	32	0	aa_296X	0.4328
HLA-A	54	0.990741	32	1	aa_297R	0.433
HLA-A	54	0.00925926	32	0	aa_297del	0.4328
HLA-A	54	0.990741	32	1	aa_298W	0.433
HLA-A	54	0.00925926	32	0	aa_298del	0.4328
HLA-A	54	0.00925926	32	0	aa_299del	0.4328
HLA-A	54	0.990741	32	1	aa_299E	0.433
HLA-A	54	0.00925926	32	0	aa_300del	0.4328
HLA-A	54	0.712963	32	0.625	aa_300P	0.1703
HLA-A	54	0.277778	32	0.375	aa_300L	0.1168
HLA-A	54	0.990741	32	1	aa_301S	0.433
HLA-A	54	0.00925926	32	0	aa_301del	0.4328
HLA-A	54	0.00925926	32	0	aa_302del	0.4328
HLA-A	54	0.990741	32	1	aa_302S	0.433
HLA-A	54	0.00925926	32	0	aa_303del	0.4328
HLA-A	54	0.990741	32	1	aa_303Q	0.433
HLA-A	54	0.990741	32	1	aa_304P	0.433
HLA-A	54	0.00925926	32	0	aa_304del	0.4328
HLA-A	54	0.00925926	32	0	aa_305del	0.4328
HLA-A	54	0.990741	32	1	aa_305T	0.433
HLA-A	54	0.00925926	32	0	aa_306del	0.4328
HLA-A	54	0.203704	32	0.078125	aa_306V	0.0497
HLA-A	54	0.787037	32	0.921875	aa_306I	0.0342
HLA-A	54	0.00925926	32	0	aa_307del	0.4328
HLA-A	54	0.888889	32	1	aa_307P	0.00562
HLA-A	54	0.101852	32	0	aa_307H	0.00926
HLA-A	54	0.990741	32	1	aa_308I	0.433
HLA-A	54	0.00925926	32	0	aa_308del	0.4328
HLA-A	54	0.990741	32	1	aa_309V	0.433
HLA-A	54	0.00925926	32	0	aa_309del	0.4328
HLA-A	54	0.990741	32	1	aa_310G	0.433
HLA-A	54	0.00925926	32	0	aa_310del	0.4328
HLA-A	54	0.990741	32	1	aa_311I	0.433
HLA-A	54	0.00925926	32	0	aa_311del	0.4328
HLA-A	54	0.990741	32	1	aa_312I	0.433
HLA-A	54	0.00925926	32	0	aa_312del	0.4328
HLA-A	54	0.990741	32	1	aa_313A	0.433
HLA-A	54	0.00925926	32	0	aa_313del	0.4328
HLA-A	54	0.00925926	32	0	aa_314del	0.4328
HLA-A	54	0.990741	32	1	aa_314G	0.433
HLA-A	54	0.990741	32	1	aa_315L	0.433
HLA-A	54	0.00925926	32	0	aa_315del	0.4328
HLA-A	54	0.00925926	32	0	aa_316del	0.4328
HLA-A	54	0.990741	32	1	aa_316V	0.433
HLA-A	54	0.00925926	32	0	aa_317del	0.4328
HLA-A	54	0.990741	32	1	aa_317L	0.433
HLA-A	54	0.00925926	32	0	aa_318del	0.4328
HLA-A	54	0.509259	32	0.546875	aa_318F	0.766
HLA-A	54	0.481481	32	0.453125	aa_318L	0.8698
HLA-A	54	0.990741	32	1	aa_319G	0.433
HLA-A	54	0.00925926	32	0	aa_319del	0.4328
HLA-A	54	0.990741	32	1	aa_320A	0.433
HLA-A	54	0.00925926	32	0	aa_320del	0.4328
HLA-A	54	0.00925926	32	0	aa_321del	0.4328
HLA-A	54	0.0555556	32	0.109375	aa_321M	0.174
HLA-A	54	0.935185	32	0.890625	aa_321V	0.2789
HLA-A	54	0.00925926	32	0	aa_322del	0.4328
HLA-A	54	0.175926	32	0.21875	aa_322F	0.4206
HLA-A	54	0.814815	32	0.78125	aa_322I	0.5204
HLA-A	54	0.00925926	32	0	aa_323del	0.4328
HLA-A	54	0.231481	32	0.265625	aa_323A	0.8512
HLA-A	54	0.759259	32	0.734375	aa_323T	0.9677
HLA-A	54	0.990741	32	1	aa_324G	0.433
HLA-A	54	0.00925926	32	0	aa_324del	0.4328
HLA-A	54	0.990741	32	1	aa_325A	0.433
HLA-A	54	0.00925926	32	0	aa_325del	0.4328
HLA-A	54	0.990741	32	1	aa_326V	0.433
HLA-A	54	0.00925926	32	0	aa_326del	0.4328
HLA-A	54	0.00925926	32	0	aa_327del	0.4328
HLA-A	54	0.990741	32	1	aa_327V	0.433
HLA-A	54	0.00925926	32	0	aa_328del	0.4328
HLA-A	54	0.990741	32	1	aa_328A	0.433
HLA-A	54	0.990741	32	1	aa_329A	0.433
HLA-A	54	0.00925926	32	0	aa_329del	0.4328
HLA-A	54	0.00925926	32	0	aa_330del	0.4328
HLA-A	54	0.990741	32	1	aa_330V	0.433
HLA-A	54	0.00925926	32	0	aa_331del	0.4328
HLA-A	54	0.814815	32	0.78125	aa_331M	0.5204
HLA-A	54	0.175926	32	0.21875	aa_331R	0.4206
HLA-A	54	0.00925926	32	0	aa_332del	0.4328
HLA-A	54	0.990741	32	1	aa_332W	0.433
HLA-A	54	0.990741	32	1	aa_333R	0.433
HLA-A	54	0.00925926	32	0	aa_333del	0.4328
HLA-A	54	0.990741	32	1	aa_334R	0.433
HLA-A	54	0.00925926	32	0	aa_334del	0.4328
HLA-A	54	0.787037	32	0.921875	aa_335K	0.0342
HLA-A	54	0.203704	32	0.078125	aa_335N	0.0497
HLA-A	54	0.00925926	32	0	aa_335del	0.4328
HLA-A	54	0.00925926	32	0	aa_336del	0.4328
HLA-A	54	0.990741	32	1	aa_336S	0.433
HLA-A	54	0.00925926	32	0	aa_337del	0.4328
HLA-A	54	0.990741	32	1	aa_337S	0.433
HLA-A	54	0.990741	32	1	aa_338D	0.433
HLA-A	54	0.00925926	32	0	aa_338del	0.4328
HLA-A	54	0.990741	32	1	aa_339R	0.433
HLA-A	54	0.00925926	32	0	aa_339del	0.4328
HLA-A	54	0.990741	32	1	aa_340K	0.433
HLA-A	54	0.00925926	32	0	aa_340del	0.4328
HLA-A	54	0.00925926	32	0	aa_341del	0.4328
HLA-A	54	0.990741	32	1	aa_341G	0.433
HLA-A	54	0.990741	32	1	aa_342G	0.433
HLA-A	54	0.00925926	32	0	aa_342del	0.4328
HLA-A	54	0.990741	32	1	aa_343S	0.433
HLA-A	54	0.00925926	32	0	aa_343del	0.4328
HLA-A	54	0.990741	32	1	aa_344Y	0.433
HLA-A	54	0.00925926	32	0	aa_344del	0.4328
HLA-A	54	0.287037	32	0.375	aa_345T	0.152
HLA-A	54	0.00925926	32	0	aa_345del	0.4328
HLA-A	54	0.703704	32	0.625	aa_345S	0.21403
HLA-A	54	0.00925926	32	0	aa_346del	0.4328
HLA-A	54	0.990741	32	1	aa_346Q	0.433
HLA-A	54	0.990741	32	1	aa_347A	0.433
HLA-A	54	0.00925926	32	0	aa_347del	0.4328
HLA-A	54	0.990741	32	1	aa_348A	0.433
HLA-A	54	0.00925926	32	0	aa_348del	0.4328
HLA-A	54	0.990741	32	1	aa_349S	0.433
HLA-A	54	0.00925926	32	0	aa_349del	0.4328
HLA-A	54	0.990741	32	1	aa_350S	0.433
HLA-A	54	0.00925926	32	0	aa_350del	0.4328
HLA-A	54	0.990741	32	1	aa_351D	0.433
HLA-A	54	0.00925926	32	0	aa_351del	0.4328
HLA-A	54	0.990741	32	1	aa_352S	0.433
HLA-A	54	0.00925926	32	0	aa_352del	0.4328
HLA-A	54	0.990741	32	1	aa_353A	0.433
HLA-A	54	0.00925926	32	0	aa_353del	0.4328
HLA-A	54	0.990741	32	1	aa_354Q	0.433
HLA-A	54	0.00925926	32	0	aa_354del	0.4328
HLA-A	54	0.00925926	32	0	aa_355del	0.4328
HLA-A	54	0.990741	32	1	aa_355G	0.433
HLA-A	54	0.00925926	32	0	aa_356del	0.4328
HLA-A	54	0.990741	32	1	aa_356S	0.433
HLA-A	54	0.00925926	32	0	aa_357del	0.4328
HLA-A	54	0.990741	32	1	aa_357D	0.433
HLA-A	54	0.768519	32	0.734375	aa_358V	0.7951
HLA-A	54	0.222222	32	0.265625	aa_358M	0.6803
HLA-A	54	0.00925926	32	0	aa_358del	0.4328
HLA-A	54	0.00925926	32	0	aa_359del	0.4328
HLA-A	54	0.990741	32	1	aa_359S	0.433
HLA-A	54	0.00925926	32	0	aa_360del	0.4328
HLA-A	54	0.990741	32	1	aa_360L	0.433
HLA-A	54	0.990741	32	1	aa_361T	0.433
HLA-A	54	0.00925926	32	0	aa_361del	0.4328
HLA-A	54	0.00925926	32	0	aa_362del	0.4328
HLA-A	54	0.990741	32	1	aa_362A	0.433
HLA-A	54	0.00925926	32	0	aa_363del	0.4328
HLA-A	54	0.990741	32	1	aa_363C	0.433
HLA-A	54	0.00925926	32	0	aa_364del	0.4328
HLA-A	54	0.990741	32	1	aa_364K	0.433
HLA-A	54	0.990741	32	1	aa_365V	0.433
HLA-A	54	0.00925926	32	0	aa_365del	0.4328
HLA-A	54	0.990741	32	1	aa_366X	0.433
HLA-A	54	0.00925926	32	0	aa_366del	0.4328
HLA-B	54	0.768519	32	0.75	aa_2R	0.7432
HLA-B	54	0.231481	32	0.25	aa_2L	0.743
HLA-B	54	0.231481	32	0.25	aa_4M	0.743
HLA-B	54	0.768519	32	0.75	aa_4T	0.7432
HLA-B	54	0.287037	32	0.265625	aa_9L	0.9646
HLA-B	54	0.712963	32	0.734375	aa_9V	0.9646
HLA-B	54	0.583333	32	0.59375	aa_14W	0.5582
HLA-B	54	0.416667	32	0.40625	aa_14S	0.55818
HLA-B	54	0.601852	32	0.6875	aa_15G	0.1518
HLA-B	54	0.398148	32	0.3125	aa_15A	0.15177
HLA-B	54	0.574074	32	0.578125	aa_17V	0.6465
HLA-B	54	0.425926	32	0.421875	aa_17L	0.6465
HLA-B	54	0.0555556	32	0.046875	aa_33D	0.7828
HLA-B	54	0.675926	32	0.796875	aa_33Y	0.153
HLA-B	54	0.268519	32	0.15625	aa_33H	0.15377
HLA-B	54	0.240741	32	0.234375	aa_35S	0.6772
HLA-B	54	0.759259	32	0.765625	aa_35A	0.6772
HLA-B	54	0.277778	32	0.296875	aa_36V	0.8002
HLA-B	54	0.722222	32	0.703125	aa_36M	0.8002
HLA-B	54	0.37963	32	0.234375	aa_48T	0.14432
HLA-B	54	0.324074	32	0.40625	aa_48A	0.2307
HLA-B	54	0.296296	32	0.359375	aa_48S	0.9183
HLA-B	54	0.0555556	32	0.078125	aa_54G	0.6217
HLA-B	54	0.944444	32	0.921875	aa_54D	0.6217
HLA-B	54	0.361111	32	0.21875	aa_56L	0.13979
HLA-B	54	0.638889	32	0.78125	aa_56Q	0.14
HLA-B	54	0.62963	32	0.765625	aa_65A	0.154
HLA-B	54	0.37037	32	0.234375	aa_65T	0.15384
HLA-B	54	0.0740741	32	0.109375	aa_69M	0.28755
HLA-B	54	0.351852	32	0.21875	aa_69K	0.14848
HLA-B	54	0.25	32	0.296875	aa_69E	0.9843
HLA-B	54	0.324074	32	0.375	aa_69T	0.3968
HLA-B	54	0.0740741	32	0.109375	aa_70A	0.28755
HLA-B	54	0.925926	32	0.890625	aa_70E	0.2875
HLA-B	54	0.944444	32	0.953125	aa_86R	0.802
HLA-B	54	0.0555556	32	0.046875	aa_86G	0.802
HLA-B	54	0.527778	32	0.625	aa_87N	0.4954
HLA-B	54	0.472222	32	0.375	aa_87E	0.4954
HLA-B	54	0.944444	32	0.921875	aa_89Q	0.5678
HLA-B	54	0.0555556	32	0.078125	aa_89R	0.568
HLA-B	54	0.944444	32	0.921875	aa_90I	0.5678
HLA-B	54	0.0555556	32	0.078125	aa_90N	0.568
HLA-B	54	0.296296	32	0.296875	aa_91F	0.8592
HLA-B	54	0.453704	32	0.375	aa_91S	0.57873
HLA-B	54	0.0555556	32	0.078125	aa_91M	0.568
HLA-B	54	0.0648148	32	0.125	aa_91Y	0.5862
HLA-B	54	0.12963	32	0.125	aa_91C	0.7442
HLA-B	54	0.12963	32	0.203125	aa_93A	0.4669
HLA-B	54	0.87037	32	0.796875	aa_93T	0.4669
HLA-B	54	0.0648148	32	0.125	aa_94Q	0.5862
HLA-B	54	0.0555556	32	0.078125	aa_94S	0.568
HLA-B	54	0.00925926	32	0	aa_94K	0.709
HLA-B	54	0.87037	32	0.796875	aa_94N	0.4669
HLA-B	54	0.12963	32	0.203125	aa_95A	0.4669
HLA-B	54	0.87037	32	0.796875	aa_95T	0.4669
HLA-B	54	0.212963	32	0.25	aa_98D	0.9921
HLA-B	54	0.787037	32	0.75	aa_98Y	0.9921
HLA-B	54	0.425926	32	0.421875	aa_101N	0.612
HLA-B	54	0.555556	32	0.578125	aa_101S	0.7001
HLA-B	54	0.0185185	32	0	aa_101D	0.5551
HLA-B	54	0.555556	32	0.578125	aa_104N	0.7001
HLA-B	54	0.25	32	0.265625	aa_104I	0.5153
HLA-B	54	0.194444	32	0.15625	aa_104T	0.825
HLA-B	54	0.574074	32	0.578125	aa_105L	0.6121
HLA-B	54	0.425926	32	0.421875	aa_105A	0.612
HLA-B	54	0.555556	32	0.578125	aa_106R	0.7001
HLA-B	54	0.444444	32	0.421875	aa_106L	0.7001
HLA-B	54	0.555556	32	0.578125	aa_107G	0.7001
HLA-B	54	0.444444	32	0.421875	aa_107R	0.7001
HLA-B	54	0.62963	32	0.640625	aa_118T	0.879
HLA-B	54	0.37037	32	0.359375	aa_118I	0.8788
HLA-B	54	0.37963	32	0.359375	aa_119I	0.9317
HLA-B	54	0.361111	32	0.453125	aa_119L	0.5638
HLA-B	54	0.259259	32	0.1875	aa_119W	0.39762
HLA-B	54	0.148148	32	0.171875	aa_121S	0.7285
HLA-B	54	0.037037	32	0.03125	aa_121V	0.8611
HLA-B	54	0.638889	32	0.578125	aa_121R	0.6969
HLA-B	54	0.12963	32	0.140625	aa_121T	0.6187
HLA-B	54	0.00925926	32	0	aa_121N	0.709
HLA-B	54	0.037037	32	0.078125	aa_121W	0.3566
HLA-B	54	0.00925926	32	0	aa_122T	0.43026
HLA-B	54	0.990741	32	1	aa_122M	0.43
HLA-B	54	0.990741	32	1	aa_123Y	0.657
HLA-B	54	0.00925926	32	0	aa_123S	0.657
HLA-B	54	0.314815	32	0.234375	aa_127L	0.36924
HLA-B	54	0.685185	32	0.765625	aa_127V	0.3692
HLA-B	54	0.037037	32	0.03125	aa_133F	0.6774
HLA-B	54	0.962963	32	0.96875	aa_133L	0.677
HLA-B	54	0.324074	32	0.28125	aa_137Y	0.69316
HLA-B	54	0.675926	32	0.71875	aa_137H	0.6932
HLA-B	54	0.453704	32	0.5625	aa_138D	0.239
HLA-B	54	0.537037	32	0.40625	aa_138N	0.10816
HLA-B	54	0.00925926	32	0.03125	aa_138H	0.2264
HLA-B	54	0.138889	32	0.109375	aa_140F	0.67447
HLA-B	54	0.240741	32	0.296875	aa_140S	0.4668
HLA-B	54	0.324074	32	0.375	aa_140Y	0.6953
HLA-B	54	0.157407	32	0.15625	aa_140D	0.8907
HLA-B	54	0.138889	32	0.0625	aa_140L	0.15458
HLA-B	54	0.194444	32	0.203125	aa_155R	0.68551
HLA-B	54	0.805556	32	0.796875	aa_155S	0.6855
HLA-B	54	0.962963	32	0.984375	aa_167T	0.67
HLA-B	54	0.037037	32	0.015625	aa_167S	0.6703
HLA-B	54	0.981481	32	0.984375	aa_169R	0.993
HLA-B	54	0.0185185	32	0.015625	aa_169L	0.9928
HLA-B	54	0.962963	32	0.984375	aa_171W	0.67
HLA-B	54	0.037037	32	0.015625	aa_171L	0.6703
HLA-B	54	0.277778	32	0.421875	aa_176E	0.1944
HLA-B	54	0.722222	32	0.578125	aa_176V	0.19439
HLA-B	54	0.175926	32	0.1875	aa_180D	0.8527
HLA-B	54	0.731481	32	0.65625	aa_180L	0.52278
HLA-B	54	0.0185185	32	0.03125	aa_180W	0.39284
HLA-B	54	0.0740741	32	0.125	aa_180R	0.7659
HLA-B	54	0.916667	32	0.984375	aa_182A	0.102
HLA-B	54	0.0833333	32	0.015625	aa_182T	0.10206
HLA-B	54	0.583333	32	0.609375	aa_187L	0.531
HLA-B	54	0.138889	32	0.15625	aa_187E	0.9319
HLA-B	54	0.277778	32	0.234375	aa_187T	0.53976
HLA-B	54	0.805556	32	0.84375	aa_191W	0.6476
HLA-B	54	0.194444	32	0.15625	aa_191S	0.64764
HLA-B	54	0.824074	32	0.71875	aa_195Y	0.1203
HLA-B	54	0.175926	32	0.28125	aa_195H	0.1203
HLA-B	54	0.833333	32	0.8125	aa_201E	0.8793
HLA-B	54	0.166667	32	0.1875	aa_201D	0.8793
HLA-B	54	0.916667	32	0.875	aa_202T	0.7282
HLA-B	54	0.0833333	32	0.125	aa_202K	0.7282
HLA-B	54	0.833333	32	0.8125	aa_204Q	0.8793
HLA-B	54	0.166667	32	0.1875	aa_204E	0.8793
HLA-B	54	0.259259	32	0.296875	aa_218V	0.4828
HLA-B	54	0.740741	32	0.703125	aa_218I	0.48277
HLA-B	54	0.87037	32	0.875	aa_223A	0.8985
HLA-B	54	0.12963	32	0.125	aa_223V	0.8985
HLA-B	54	0.537037	32	0.484375	aa_306V	0.41672
HLA-B	54	0.462963	32	0.515625	aa_306I	0.4167
HLA-B	54	0.462963	32	0.515625	aa_329T	0.4167
HLA-B	54	0.537037	32	0.484375	aa_329A	0.41672
HLA-B	54	0.583333	32	0.609375	aa_349S	0.6475
HLA-B	54	0.416667	32	0.390625	aa_349C	0.64751
HLA-C	54	0.0185185	31	0.016129	aa_7Q	0.85974
HLA-C	54	0.981481	31	0.983871	aa_7R	0.8597
HLA-C	54	0.231481	31	0.290323	aa_8A	0.71557
HLA-C	54	0.768519	31	0.709677	aa_8T	0.7156
HLA-C	54	0.666667	31	0.564516	aa_10I	0.25612
HLA-C	54	0.333333	31	0.435484	aa_10L	0.2561
HLA-C	54	0.787037	31	0.725806	aa_16A	0.6699
HLA-C	54	0.212963	31	0.274194	aa_16G	0.66988
HLA-C	54	0.981481	31	0.983871	aa_20T	0.8597
HLA-C	54	0.0185185	31	0.016129	aa_20I	0.85974
HLA-C	54	0.694444	31	0.741935	aa_25C	0.7279
HLA-C	54	0.305556	31	0.258065	aa_25G	0.72789
HLA-C	54	0.990741	31	0.983871	aa_30R	0.672
HLA-C	54	0.00925926	31	0.016129	aa_30K	0.67207
HLA-C	54	0.305556	31	0.306452	aa_33D	0.57643
HLA-C	54	0.472222	31	0.483871	aa_33Y	0.5814
HLA-C	54	0.00925926	31	0.016129	aa_33F	0.67207
HLA-C	54	0.212963	31	0.193548	aa_33S	0.86695
HLA-C	54	0.222222	31	0.209677	aa_35S	0.95676
HLA-C	54	0.777778	31	0.790323	aa_35A	0.9568
HLA-C	54	0.203704	31	0.16129	aa_38W	0.60598
HLA-C	54	0.796296	31	0.83871	aa_38R	0.606
HLA-C	54	0.0648148	31	0.0806452	aa_40S	0.5246
HLA-C	54	0.935185	31	0.919355	aa_40G	0.5246
HLA-C	54	0.814815	31	0.774194	aa_45R	0.2908
HLA-C	54	0.185185	31	0.225806	aa_45H	0.29077
HLA-C	54	0.685185	31	0.677419	aa_48A	0.653
HLA-C	54	0.314815	31	0.322581	aa_48S	0.65296
HLA-C	54	0.12963	31	0.16129	aa_59Q	0.6945
HLA-C	54	0.87037	31	0.83871	aa_59R	0.6945
HLA-C	54	0.796296	31	0.83871	aa_73A	0.606
HLA-C	54	0.203704	31	0.16129	aa_73E	0.60598
HLA-C	54	0.805556	31	0.774194	aa_90K	0.40885
HLA-C	54	0.194444	31	0.225806	aa_90N	0.4088
HLA-C	54	0.388889	31	0.467742	aa_97T	0.2171
HLA-C	54	0.611111	31	0.532258	aa_97A	0.2171
HLA-C	54	0.5	31	0.516129	aa_101S	0.96111
HLA-C	54	0.5	31	0.483871	aa_101N	0.9611
HLA-C	54	0.5	31	0.483871	aa_104K	0.9611
HLA-C	54	0.5	31	0.516129	aa_104N	0.96111
HLA-C	54	0.509259	31	0.483871	aa_114D	0.52394
HLA-C	54	0.490741	31	0.516129	aa_114A	0.5239
HLA-C	54	0.0185185	31	0.0483871	aa_115R	0.23324
HLA-C	54	0.981481	31	0.951613	aa_115G	0.2332
HLA-C	54	0.12037	31	0.145161	aa_118I	0.50259
HLA-C	54	0.87963	31	0.854839	aa_118T	0.5026
HLA-C	54	0	31	0.016129	aa_119F	0.31527
HLA-C	54	0.12963	31	0.16129	aa_119I	0.44493
HLA-C	54	0.87037	31	0.822581	aa_119L	0.4713
HLA-C	54	0.75	31	0.854839	aa_121R	0.1244
HLA-C	54	0.25	31	0.145161	aa_121W	0.1244
HLA-C	54	0.00925926	31	0.016129	aa_123C	0.67207
HLA-C	54	0.212963	31	0.209677	aa_123F	0.88823
HLA-C	54	0.0555556	31	0.112903	aa_123S	0.54941
HLA-C	54	0.722222	31	0.66129	aa_123Y	0.56252
HLA-C	54	0.916667	31	0.935484	aa_127L	0.769
HLA-C	54	0.0833333	31	0.0645161	aa_127V	0.76938
HLA-C	54	0.037037	31	0.0806452	aa_137H	0.16997
HLA-C	54	0.962963	31	0.919355	aa_137Y	0.16997
HLA-C	54	0.648148	31	0.645161	aa_138D	0.9373
HLA-C	54	0.351852	31	0.354839	aa_138N	0.9373
HLA-C	54	0.527778	31	0.467742	aa_140S	0.47533
HLA-C	54	0.361111	31	0.387097	aa_140F	0.946
HLA-C	54	0.0833333	31	0.0806452	aa_140Y	0.89589
HLA-C	54	0.0277778	31	0.0645161	aa_140L	0.127
HLA-C	54	0.12037	31	0.16129	aa_162K	0.5856
HLA-C	54	0.87963	31	0.83871	aa_162T	0.5856
HLA-C	54	0.0185185	31	0.016129	aa_167S	0.85974
HLA-C	54	0.981481	31	0.983871	aa_167T	0.8597
HLA-C	54	0.768519	31	0.709677	aa_171W	0.7156
HLA-C	54	0.231481	31	0.290323	aa_171L	0.71557
HLA-C	54	0.268519	31	0.322581	aa_176A	0.6949
HLA-C	54	0.00925926	31	0	aa_176T	0.5257
HLA-C	54	0.722222	31	0.677419	aa_176E	0.7805
HLA-C	54	0	31	0.016129	aa_180D	0.31527
HLA-C	54	0.0555556	31	0.0483871	aa_180Q	0.9837
HLA-C	54	0.342593	31	0.387097	aa_180R	0.5496
HLA-C	54	0.240741	31	0.129032	aa_180W	0.16342
HLA-C	54	0.361111	31	0.419355	aa_180L	0.4878
HLA-C	54	0.0833333	31	0.0645161	aa_187L	0.76938
HLA-C	54	0.0833333	31	0.0806452	aa_187E	0.98106
HLA-C	54	0.833333	31	0.854839	aa_187T	0.8469
HLA-C	54	0.0185185	31	0.016129	aa_194G	0.85974
HLA-C	54	0.981481	31	0.983871	aa_194R	0.8597
HLA-C	54	0.916667	31	0.935484	aa_197E	0.769
HLA-C	54	0.0833333	31	0.0645161	aa_197K	0.76938
HLA-C	54	0.00925926	31	0	aa_199R	0.5257
HLA-C	54	0.990741	31	1	aa_199G	0.5257
HLA-C	54	0.12963	31	0.177419	aa_201K	0.72373
HLA-C	54	0.87037	31	0.822581	aa_201E	0.7237
HLA-C	54	0.990741	31	1	aa_207E	0.3755
HLA-C	54	0.00925926	31	0	aa_207D	0.37551
HLA-C	54	0.212963	31	0.274194	aa_208P	0.66988
HLA-C	54	0.768519	31	0.709677	aa_208H	0.7156
HLA-C	54	0.0185185	31	0.016129	aa_208R	0.85974
HLA-C	54	0.944444	31	0.951613	aa_217P	0.9837
HLA-C	54	0.0555556	31	0.0483871	aa_217L	0.9837
HLA-C	54	0.787037	31	0.725806	aa_218V	0.6699
HLA-C	54	0.212963	31	0.274194	aa_218L	0.66988
HLA-C	54	0.0648148	31	0.0645161	aa_235T	0.90194
HLA-C	54	0.935185	31	0.935484	aa_235A	0.9019
HLA-C	54	0.296296	31	0.290323	aa_243W	0.83433
HLA-C	54	0.703704	31	0.709677	aa_243R	0.8343
HLA-C	54	0.990741	31	1	aa_253E	0.4839
HLA-C	54	0.00925926	31	0	aa_253Q	0.48394
HLA-C	54	0.00925926	31	0.016129	aa_272M	0.67207
HLA-C	54	0.990741	31	0.983871	aa_272V	0.672
HLA-C	54	0.768519	31	0.709677	aa_277E	0.7156
HLA-C	54	0.231481	31	0.290323	aa_277Q	0.71557
HLA-C	54	0.212963	31	0.274194	aa_285M	0.66988
HLA-C	54	0.787037	31	0.725806	aa_285V	0.6699
HLA-C	54	0.240741	31	0.274194	aa_291Q	0.96168
HLA-C	54	0.759259	31	0.725806	aa_291P	0.9617
HLA-C	54	0.981481	31	1	aa_294L	0.2335
HLA-C	54	0.0185185	31	0	aa_294C	0.23351
HLA-C	54	0.212963	31	0.274194	aa_297S	0.66988
HLA-C	54	0.787037	31	0.725806	aa_297R	0.6699
HLA-C	54	0.222222	31	0.177419	aa_299K	0.63464
HLA-C	54	0.648148	31	0.66129	aa_299E	0.8919
HLA-C	54	0.12963	31	0.16129	aa_299G	0.6945
HLA-C	54	0.981481	31	0.983871	aa_308I	0.8597
HLA-C	54	0.0185185	31	0.016129	aa_308N	0.85974
HLA-C	54	0.212963	31	0.274194	aa_309M	0.66988
HLA-C	54	0.0185185	31	0.016129	aa_309L	0.85974
HLA-C	54	0.768519	31	0.709677	aa_309V	0.7156
HLA-C	54	0.981481	31	0.983871	aa_313A	0.8597
HLA-C	54	0.0185185	31	0.016129	aa_313S	0.85974
HLA-C	54	0.981481	31	0.983871	aa_315del	0.8597
HLA-C	54	0.0185185	31	0.016129	aa_315P	0.85974
HLA-C	54	0.981481	31	0.983871	aa_316del	0.8597
HLA-C	54	0.0185185	31	0.016129	aa_316A	0.85974
HLA-C	54	0.981481	31	0.983871	aa_317del	0.8597
HLA-C	54	0.0185185	31	0.016129	aa_317V	0.85974
HLA-C	54	0.981481	31	0.983871	aa_318del	0.8597
HLA-C	54	0.0185185	31	0.016129	aa_318L	0.85974
HLA-C	54	0.981481	31	0.983871	aa_319del	0.8597
HLA-C	54	0.0185185	31	0.016129	aa_319A	0.85974
HLA-C	54	0.0185185	31	0.016129	aa_320V	0.85974
HLA-C	54	0.981481	31	0.983871	aa_320del	0.8597
HLA-C	54	0.212963	31	0.274194	aa_325V	0.66988
HLA-C	54	0.787037	31	0.725806	aa_325A	0.6699
HLA-C	54	0.796296	31	0.83871	aa_333V	0.606
HLA-C	54	0.203704	31	0.16129	aa_333M	0.60598
HLA-C	54	0.342593	31	0.306452	aa_334M	0.63982
HLA-C	54	0.657407	31	0.693548	aa_334V	0.6398
HLA-C	54	0.787037	31	0.725806	aa_335A	0.6699
HLA-C	54	0.212963	31	0.274194	aa_335T	0.66988
HLA-C	54	0.231481	31	0.290323	aa_336A	0.71557
HLA-C	54	0.768519	31	0.709677	aa_336V	0.7156
HLA-C	54	0.212963	31	0.274194	aa_337M	0.66988
HLA-C	54	0.787037	31	0.725806	aa_337V	0.6699
HLA-C	54	0.0185185	31	0.016129	aa_338I	0.85974
HLA-C	54	0.981481	31	0.983871	aa_338M	0.8597
HLA-C	54	0.0185185	31	0.016129	aa_339H	0.85974
HLA-C	54	0.981481	31	0.983871	aa_339C	0.8597
HLA-C	54	0.990741	31	0.983871	aa_354A	0.6715
HLA-C	54	0.00925926	31	0.016129	aa_354V	0.67148
HLA-C	54	0.212963	31	0.274194	aa_356C	0.66988
HLA-C	54	0.787037	31	0.725806	aa_356S	0.6699
HLA-C	54	0.787037	31	0.725806	aa_369A	0.6699
HLA-C	54	0.212963	31	0.274194	aa_369T	0.66988
HLA-DMA	54	0.148148	32	0.140625	aa_166I	0.32951
HLA-DMA	54	0.851852	32	0.859375	aa_166V	0.33
HLA-DMA	54	0.990741	32	0.953125	aa_181G	0.1497
HLA-DMA	54	0.00925926	32	0.046875	aa_181A	0.1497
HLA-DMA	54	0.037037	32	0	aa_210C	0.07368
HLA-DMA	54	0.953704	32	0.953125	aa_210R	0.822
HLA-DMA	54	0.00925926	32	0.046875	aa_210H	0.1497
HLA-DMB	54	0.990741	32	0.953125	aa_28T	0.1497
HLA-DMB	54	0.00925926	32	0.046875	aa_28A	0.1497
HLA-DMB	54	0.00925926	32	0.046875	aa_49V	0.1497
HLA-DMB	54	0.990741	32	0.953125	aa_49D	0.1497
HLA-DMB	54	0.990741	32	0.953125	aa_71S	0.1497
HLA-DMB	54	0.00925926	32	0.046875	aa_71N	0.1497
HLA-DMB	54	0.0185185	32	0	aa_162V	0.43096
HLA-DMB	54	0.0185185	32	0.0625	aa_162E	0.1692
HLA-DMB	54	0.962963	32	0.9375	aa_162A	0.434
HLA-DMB	54	0.787037	32	0.8125	aa_197I	0.691
HLA-DMB	54	0.212963	32	0.1875	aa_197T	0.691
HLA-DOA	54	0.0185185	32	0	aa_139L	0.32122
HLA-DOA	54	0.981481	32	1	aa_139F	0.321
HLA-DOB	54	0.00925926	32	0.078125	aa_18Q	0.00199
HLA-DOB	54	0.990741	32	0.921875	aa_18R	0.00199
HLA-DOB	54	0.037037	32	0.015625	aa_210I	0.49796
HLA-DOB	54	0.962963	32	0.984375	aa_210V	0.498
HLA-DOB	54	0.935185	32	0.953125	aa_234L	0.667
HLA-DOB	54	0.0648148	32	0.046875	aa_234F	0.6666
HLA-DOB	54	0.935185	32	0.984375	aa_244V	0.125
HLA-DOB	54	0.0648148	32	0.015625	aa_244I	0.1251
HLA-DPA1	54	0.953704	32	0.9375	aa_42A	0.9574
HLA-DPA1	54	0.0462963	32	0.0625	aa_42M	0.9574
HLA-DPA1	54	0.990741	32	1	aa_59E	0.567
HLA-DPA1	54	0.00925926	32	0	aa_59D	0.5672
HLA-DPA1	54	0.824074	32	0.734375	aa_62M	0.5723
HLA-DPA1	54	0.175926	32	0.265625	aa_62Q	0.5723
HLA-DPA1	54	0.824074	32	0.734375	aa_81Q	0.5723
HLA-DPA1	54	0.175926	32	0.265625	aa_81R	0.5723
HLA-DPA1	54	0.0185185	32	0.015625	aa_97S	0.8849
HLA-DPA1	54	0.981481	32	0.984375	aa_97L	0.885
HLA-DPA1	54	0.175926	32	0.265625	aa_114A	0.5723
HLA-DPA1	54	0.824074	32	0.734375	aa_114T	0.5723
HLA-DPA1	54	0.824074	32	0.734375	aa_142K	0.5723
HLA-DPA1	54	0.175926	32	0.265625	aa_142R	0.5723
HLA-DPA1	54	0.175926	32	0.265625	aa_158P	0.5723
HLA-DPA1	54	0.824074	32	0.734375	aa_158L	0.5723
HLA-DPA1	54	0.175926	32	0.265625	aa_191V	0.5723
HLA-DPA1	54	0.824074	32	0.734375	aa_191F	0.5723
HLA-DPA1	54	0.824074	32	0.734375	aa_259T	0.5723
HLA-DPA1	54	0.175926	32	0.265625	aa_259P	0.5723
HLA-DPB1	54	0.685185	32	0.703125	aa_37L	0.4319
HLA-DPB1	54	0.314815	32	0.296875	aa_37V	0.43188
HLA-DPB1	54	0.231481	32	0.171875	aa_38Y	0.41029
HLA-DPB1	54	0.685185	32	0.703125	aa_38F	0.4319
HLA-DPB1	54	0.0833333	32	0.125	aa_38H	0.9919
HLA-DPB1	54	0.75	32	0.8125	aa_40G	0.103
HLA-DPB1	54	0.25	32	0.1875	aa_40L	0.10316
HLA-DPB1	54	0.972222	32	1	aa_62E	0.135
HLA-DPB1	54	0.0277778	32	0	aa_62Q	0.1349
HLA-DPB1	54	0.0277778	32	0	aa_64L	0.1576
HLA-DPB1	54	0.87037	32	0.875	aa_64F	0.7803
HLA-DPB1	54	0.101852	32	0.125	aa_64Y	0.8206
HLA-DPB1	54	0.601852	32	0.5625	aa_65V	0.39016
HLA-DPB1	54	0.398148	32	0.4375	aa_65A	0.39
HLA-DPB1	54	0.398148	32	0.46875	aa_84A	0.1775
HLA-DPB1	54	0.574074	32	0.53125	aa_84D	0.32892
HLA-DPB1	54	0.0277778	32	0	aa_84E	0.1576
HLA-DPB1	54	0.574074	32	0.53125	aa_85E	0.32892
HLA-DPB1	54	0.425926	32	0.46875	aa_85A	0.3289
HLA-DPB1	54	0.796296	32	0.875	aa_86E	0.112
HLA-DPB1	54	0.203704	32	0.125	aa_86D	0.11197
HLA-DPB1	54	0.787037	32	0.921875	aa_94I	0.0271
HLA-DPB1	54	0.212963	32	0.078125	aa_94L	0.02707
HLA-DPB1	54	0.277778	32	0.34375	aa_98E	0.8299
HLA-DPB1	54	0.694444	32	0.65625	aa_98K	0.8364
HLA-DPB1	54	0.0277778	32	0	aa_98R	0.1349
HLA-DPB1	54	0.0277778	32	0.015625	aa_105I	0.50051
HLA-DPB1	54	0.203704	32	0.234375	aa_105V	0.8226
HLA-DPB1	54	0.768519	32	0.75	aa_105M	0.9687
HLA-DPB1	54	0.675926	32	0.703125	aa_113G	0.33
HLA-DPB1	54	0.305556	32	0.296875	aa_113D	0.45441
HLA-DPB1	54	0.0185185	32	0	aa_113V	0.3794
HLA-DPB1	54	0.694444	32	0.703125	aa_114G	0.4544
HLA-DPB1	54	0.305556	32	0.296875	aa_114E	0.45441
HLA-DPB1	54	0.305556	32	0.296875	aa_115A	0.45441
HLA-DPB1	54	0.694444	32	0.703125	aa_115P	0.4544
HLA-DPB1	54	0.305556	32	0.296875	aa_116V	0.45441
HLA-DPB1	54	0.694444	32	0.703125	aa_116M	0.4544
HLA-DPB1	54	0.277778	32	0.25	aa_125K	0.36715
HLA-DPB1	54	0.722222	32	0.75	aa_125R	0.3672
HLA-DPB1	54	0.296296	32	0.265625	aa_199I	0.38621
HLA-DPB1	54	0.703704	32	0.734375	aa_199T	0.3862
HLA-DPB1	54	0.833333	32	0.90625	aa_207L	0.318
HLA-DPB1	54	0.166667	32	0.09375	aa_207M	0.3182
HLA-DPB1	54	0.0462963	32	0.125	aa_223Q	0.127
HLA-DPB1	54	0.953704	32	0.859375	aa_223R	0.06928
HLA-DPB1	54	0	32	0.015625	aa_223W	0.2037
HLA-DPB1	54	0.0555556	32	0.015625	aa_234M	0.21897
HLA-DPB1	54	0.944444	32	0.984375	aa_234V	0.219
HLA-DPB1	54	0.981481	32	1	aa_244I	0.379
HLA-DPB1	54	0.0185185	32	0	aa_244T	0.3794
HLA-DRA	54	0.00925926	32	0.03125	aa_16L	0.396
HLA-DRA	54	0.990741	32	0.96875	aa_16V	0.396
HLA-DRA	54	0.740741	32	0.609375	aa_242V	0.0336
HLA-DRA	54	0.259259	32	0.390625	aa_242L	0.0336
HLA-DRB1	54	0.518519	32	0.65625	aa_5R	0.0715
HLA-DRB1	54	0.481481	32	0.34375	aa_5K	0.07154
HLA-DRB1	54	0.138889	32	0.15625	aa_6F	0.847
HLA-DRB1	54	0.861111	32	0.84375	aa_6L	0.8467
HLA-DRB1	54	0.833333	32	0.875	aa_13A	0.8668
HLA-DRB1	54	0.166667	32	0.125	aa_13T	0.8668
HLA-DRB1	54	0.481481	32	0.34375	aa_14A	0.07154
HLA-DRB1	54	0.518519	32	0.65625	aa_14V	0.0715
HLA-DRB1	54	0.925926	32	0.921875	aa_29A	0.4382
HLA-DRB1	54	0.0740741	32	0.078125	aa_29S	0.4382
HLA-DRB1	54	0.175926	32	0.0625	aa_33Q	0.02521
HLA-DRB1	54	0.824074	32	0.9375	aa_33R	0.0252
HLA-DRB1	54	0.657407	32	0.8125	aa_39E	0.049
HLA-DRB1	54	0.00925926	32	0	aa_39K	0.1684
HLA-DRB1	54	0.333333	32	0.1875	aa_39W	0.08387
HLA-DRB1	54	0.00925926	32	0.015625	aa_40E	0.7043
HLA-DRB1	54	0.481481	32	0.34375	aa_40Q	0.07154
HLA-DRB1	54	0.509259	32	0.640625	aa_40Y	0.0809
HLA-DRB1	54	0.101852	32	0.078125	aa_41P	0.922
HLA-DRB1	54	0.00925926	32	0	aa_41D	0.1684
HLA-DRB1	54	0.509259	32	0.640625	aa_41S	0.0809
HLA-DRB1	54	0.166667	32	0.0625	aa_41G	0.05074
HLA-DRB1	54	0.148148	32	0.171875	aa_41V	0.9455
HLA-DRB1	54	0.0648148	32	0.046875	aa_41L	0.7111
HLA-DRB1	54	0.490741	32	0.359375	aa_42K	0.08091
HLA-DRB1	54	0.509259	32	0.640625	aa_42T	0.0809
HLA-DRB1	54	0.0833333	32	0.0625	aa_43F	0.5751
HLA-DRB1	54	0.0277778	32	0.0625	aa_43G	0.11441
HLA-DRB1	54	0.481481	32	0.578125	aa_43S	0.252
HLA-DRB1	54	0.166667	32	0.0625	aa_43Y	0.05074
HLA-DRB1	54	0.138889	32	0.15625	aa_43H	0.847
HLA-DRB1	54	0.101852	32	0.078125	aa_43R	0.922
HLA-DRB1	54	0.833333	32	0.9375	aa_44E	0.0507
HLA-DRB1	54	0.166667	32	0.0625	aa_44K	0.05074
HLA-DRB1	54	0.0277778	32	0.0625	aa_46Y	0.11441
HLA-DRB1	54	0.972222	32	0.9375	aa_46H	0.11441
HLA-DRB1	54	0.833333	32	0.9375	aa_55R	0.0507
HLA-DRB1	54	0.166667	32	0.0625	aa_55Q	0.05074
HLA-DRB1	54	0.0740741	32	0.078125	aa_56L	0.8455
HLA-DRB1	54	0.824074	32	0.796875	aa_56F	0.8344
HLA-DRB1	54	0.101852	32	0.125	aa_56Y	0.9038
HLA-DRB1	54	0.259259	32	0.15625	aa_58E	0.10671
HLA-DRB1	54	0.00925926	32	0	aa_58H	0.1684
HLA-DRB1	54	0.731481	32	0.84375	aa_58D	0.0611
HLA-DRB1	54	0.166667	32	0.0625	aa_60L	0.05074
HLA-DRB1	54	0.00925926	32	0.015625	aa_60H	0.7064
HLA-DRB1	54	0.0648148	32	0.046875	aa_60C	0.7111
HLA-DRB1	54	0.00925926	32	0.015625	aa_60R	0.7043
HLA-DRB1	54	0.00925926	32	0	aa_60G	0.1684
HLA-DRB1	54	0.740741	32	0.859375	aa_60Y	0.0591
HLA-DRB1	54	0.916667	32	0.9375	aa_61F	0.575
HLA-DRB1	54	0.00925926	32	0.015625	aa_61V	0.7043
HLA-DRB1	54	0.0740741	32	0.046875	aa_61I	0.4332
HLA-DRB1	54	0.731481	32	0.609375	aa_62Y	0.25813
HLA-DRB1	54	0.268519	32	0.390625	aa_62H	0.258
HLA-DRB1	54	0.861111	32	0.84375	aa_63N	0.8467
HLA-DRB1	54	0.138889	32	0.15625	aa_63H	0.847
HLA-DRB1	54	0	32	0.015625	aa_67L	0.2343
HLA-DRB1	54	0.212963	32	0.296875	aa_67N	0.5418
HLA-DRB1	54	0.222222	32	0.125	aa_67F	0.11179
HLA-DRB1	54	0.175926	32	0.125	aa_67S	0.7783
HLA-DRB1	54	0.388889	32	0.4375	aa_67Y	0.4343
HLA-DRB1	54	0	32	0.015625	aa_68L	0.2343
HLA-DRB1	54	0.990741	32	0.96875	aa_68V	0.3139
HLA-DRB1	54	0.00925926	32	0.015625	aa_68A	0.7043
HLA-DRB1	54	0.990741	32	0.984375	aa_70F	0.704
HLA-DRB1	54	0.00925926	32	0.015625	aa_70Y	0.7043
HLA-DRB1	54	0.527778	32	0.46875	aa_77Y	0.3917
HLA-DRB1	54	0.472222	32	0.53125	aa_77F	0.3917
HLA-DRB1	54	0.185185	32	0.078125	aa_87V	0.04212
HLA-DRB1	54	0.0555556	32	0.0625	aa_87A	0.9127
HLA-DRB1	54	0.0740741	32	0.09375	aa_87S	0.8566
HLA-DRB1	54	0.685185	32	0.765625	aa_87D	0.1554
HLA-DRB1	54	0.787037	32	0.84375	aa_88A	0.5538
HLA-DRB1	54	0.212963	32	0.15625	aa_88E	0.55381
HLA-DRB1	54	0.0555556	32	0.0625	aa_90H	0.9127
HLA-DRB1	54	0.768519	32	0.859375	aa_90Y	0.108
HLA-DRB1	54	0.175926	32	0.078125	aa_90S	0.05192
HLA-DRB1	54	0.351852	32	0.421875	aa_97L	0.734
HLA-DRB1	54	0.388889	32	0.375	aa_97I	0.9767
HLA-DRB1	54	0.259259	32	0.203125	aa_97F	0.7086
HLA-DRB1	54	0.351852	32	0.421875	aa_100Q	0.4955
HLA-DRB1	54	0.574074	32	0.5	aa_100D	0.5519
HLA-DRB1	54	0.0740741	32	0.078125	aa_100R	0.9169
HLA-DRB1	54	0.0740741	32	0.078125	aa_101A	0.4382
HLA-DRB1	54	0.666667	32	0.515625	aa_101R	0.0807
HLA-DRB1	54	0.111111	32	0.25	aa_101K	0.0593
HLA-DRB1	54	0.148148	32	0.15625	aa_101E	0.8461
HLA-DRB1	54	0.731481	32	0.796875	aa_103A	0.2477
HLA-DRB1	54	0.268519	32	0.203125	aa_103G	0.2477
HLA-DRB1	54	0.166667	32	0.0625	aa_104Q	0.05074
HLA-DRB1	54	0.601852	32	0.625	aa_104A	0.5634
HLA-DRB1	54	0.101852	32	0.140625	aa_104R	0.6703
HLA-DRB1	54	0.101852	32	0.125	aa_104E	0.9491
HLA-DRB1	54	0.0277778	32	0.046875	aa_104L	0.23466
HLA-DRB1	54	0.101852	32	0.140625	aa_107N	0.6703
HLA-DRB1	54	0.898148	32	0.859375	aa_107T	0.6703
HLA-DRB1	54	0.175926	32	0.0625	aa_108V	0.02521
HLA-DRB1	54	0.824074	32	0.9375	aa_108Y	0.0252
HLA-DRB1	54	0.0555556	32	0.03125	aa_115A	0.369
HLA-DRB1	54	0.944444	32	0.96875	aa_115V	0.369
HLA-DRB1	54	0.472222	32	0.515625	aa_116G	0.713
HLA-DRB1	54	0.527778	32	0.484375	aa_116V	0.7128
HLA-DRB1	54	0.138889	32	0.15625	aa_126Y	0.847
HLA-DRB1	54	0.111111	32	0.09375	aa_126Q	0.8118
HLA-DRB1	54	0.685185	32	0.703125	aa_126H	0.8603
HLA-DRB1	54	0.0648148	32	0.046875	aa_126E	0.7111
HLA-DRB1	54	0.314815	32	0.21875	aa_128E	0.06443
HLA-DRB1	54	0.685185	32	0.78125	aa_128K	0.0644
HLA-DRB1	54	0.314815	32	0.21875	aa_134A	0.06443
HLA-DRB1	54	0.685185	32	0.78125	aa_134S	0.0644
HLA-DRB1	54	0.00925926	32	0	aa_142Y	0.709
HLA-DRB1	54	0.990741	32	1	aa_142H	0.709
HLA-DRB1	54	0.148148	32	0.171875	aa_150N	0.9455
HLA-DRB1	54	0.851852	32	0.828125	aa_150S	0.9455
HLA-DRB1	54	0.898148	32	0.921875	aa_163R	0.922
HLA-DRB1	54	0.101852	32	0.078125	aa_163L	0.922
HLA-DRB1	54	0.342593	32	0.1875	aa_170A	0.04898
HLA-DRB1	54	0.657407	32	0.8125	aa_170T	0.049
HLA-DRB1	54	0.898148	32	0.921875	aa_172V	0.922
HLA-DRB1	54	0.101852	32	0.078125	aa_172M	0.922
HLA-DRB1	54	0.490741	32	0.359375	aa_179Q	0.08091
HLA-DRB1	54	0.509259	32	0.640625	aa_179H	0.0809
HLA-DRB1	54	0.00925926	32	0.015625	aa_196Q	0.7043
HLA-DRB1	54	0.990741	32	0.984375	aa_196R	0.704
HLA-DRB1	54	0.861111	32	0.84375	aa_210V	0.8467
HLA-DRB1	54	0.138889	32	0.15625	aa_210L	0.847
HLA-DRB1	54	0.814815	32	0.921875	aa_211T	0.0387
HLA-DRB1	54	0.185185	32	0.078125	aa_211M	0.03872
HLA-DRB1	54	0.972222	32	0.96875	aa_219R	0.562
HLA-DRB1	54	0.0277778	32	0.03125	aa_219S	0.56201
HLA-DRB1	54	0.481481	32	0.28125	aa_263T	0.0648
HLA-DRB1	54	0.518519	32	0.71875	aa_263R	0.0648
HLA-E	54	0.990741	32	1	aa_110E	0.368
HLA-E	54	0.00925926	32	0	aa_110K	0.36779
HLA-E	54	0.425926	32	0.453125	aa_128G	0.6386
HLA-E	54	0.574074	32	0.546875	aa_128R	0.6386
HLA-F	54	0.00925926	32	0.015625	aa_71Q	0.582
HLA-F	54	0.990741	32	0.984375	aa_71P	0.582
HLA-F	54	0.175926	32	0.140625	aa_272P	0.5462
HLA-F	54	0.824074	32	0.859375	aa_272S	0.546
HLA-G	54	0.953704	32	0.9375	aa_55T	0.61
HLA-G	54	0.0462963	32	0.0625	aa_55S	0.6101
HLA-G	54	0.824074	32	0.96875	aa_134L	0.0157
HLA-G	54	0.175926	32	0.03125	aa_134I	0.01569
HLA-G	54	0.0277778	32	0	aa_154del	0.2292
HLA-G	54	0.972222	32	1	aa_154L	0.229
HLA-G	54	0.972222	32	1	aa_155R	0.229
HLA-G	54	0.0277778	32	0	aa_155del	0.2292
HLA-G	54	0.0277778	32	0	aa_156del	0.2292
HLA-G	54	0.972222	32	1	aa_156S	0.229
HLA-G	54	0.972222	32	1	aa_157W	0.229
HLA-G	54	0.0277778	32	0	aa_157del	0.2292
HLA-G	54	0.972222	32	1	aa_158T	0.229
HLA-G	54	0.0277778	32	0	aa_158del	0.2292
HLA-G	54	0.972222	32	1	aa_159A	0.229
HLA-G	54	0.0277778	32	0	aa_159C	0.2292
HLA-G	54	0.0277778	32	0	aa_161P	0.2292
HLA-G	54	0.972222	32	1	aa_161D	0.229
HLA-G	54	0.0277778	32	0	aa_162G	0.2292
HLA-G	54	0.972222	32	1	aa_162T	0.229
HLA-G	54	0.972222	32	1	aa_163A	0.229
HLA-G	54	0.0277778	32	0	aa_163P	0.2292
HLA-G	54	0.0277778	32	0	aa_164Q	0.2292
HLA-G	54	0.972222	32	1	aa_164A	0.229
HLA-G	54	0.0277778	32	0	aa_165R	0.2292
HLA-G	54	0.972222	32	1	aa_165Q	0.229
HLA-G	54	0.0277778	32	0	aa_166T	0.2292
HLA-G	54	0.972222	32	1	aa_166I	0.229
HLA-G	54	0.972222	32	1	aa_167S	0.229
HLA-G	54	0.0277778	32	0	aa_167L	0.2292
HLA-G	54	0.0277778	32	0	aa_168R	0.2292
HLA-G	54	0.972222	32	1	aa_168K	0.229
HLA-G	54	0.0277778	32	0	aa_169L	0.2292
HLA-G	54	0.972222	32	1	aa_169R	0.229
HLA-G	54	0.0277778	32	0	aa_170R	0.2292
HLA-G	54	0.972222	32	1	aa_170K	0.229
HLA-G	54	0.972222	32	1	aa_171C	0.229
HLA-G	54	0.0277778	32	0	aa_171S	0.2292
HLA-G	54	0.972222	32	1	aa_172E	0.229
HLA-G	54	0.0277778	32	0	aa_172P	0.2292
HLA-G	54	0.0277778	32	0	aa_173S	0.2292
HLA-G	54	0.972222	32	1	aa_173A	0.229
HLA-G	54	0.0277778	32	0	aa_175S	0.2292
HLA-G	54	0.972222	32	1	aa_175N	0.229
HLA-G	54	0.0277778	32	0	aa_177del	0.2292
HLA-G	54	0.972222	32	1	aa_177A	0.229
HLA-G	54	0.0277778	32	0	aa_178del	0.2292
HLA-G	54	0.972222	32	1	aa_178E	0.229
HLA-G	54	0.972222	32	1	aa_179Q	0.229
HLA-G	54	0.0277778	32	0	aa_179del	0.2292
HLA-G	54	0.972222	32	1	aa_182A	0.229
HLA-G	54	0.0277778	32	0	aa_182P	0.2292
HLA-G	54	0.972222	32	1	aa_183Y	0.229
HLA-G	54	0.0277778	32	0	aa_183M	0.2292
HLA-G	54	0.972222	32	1	aa_184L	0.229
HLA-G	54	0.0277778	32	0	aa_184del	0.2292
HLA-G	54	0.972222	32	1	aa_185E	0.229
HLA-G	54	0.0277778	32	0	aa_185del	0.2292
HLA-G	54	0.972222	32	1	aa_186G	0.229
HLA-G	54	0.0277778	32	0	aa_186del	0.2292
HLA-G	54	0.0277778	32	0	aa_187del	0.2292
HLA-G	54	0.972222	32	1	aa_187T	0.229
HLA-G	54	0.972222	32	1	aa_188C	0.229
HLA-G	54	0.0277778	32	0	aa_188del	0.2292
HLA-G	54	0.972222	32	1	aa_189V	0.229
HLA-G	54	0.0277778	32	0	aa_189del	0.2292
HLA-G	54	0.972222	32	1	aa_190E	0.229
HLA-G	54	0.0277778	32	0	aa_190del	0.2292
HLA-G	54	0.972222	32	1	aa_193H	0.229
HLA-G	54	0.0277778	32	0	aa_193del	0.2292
HLA-G	54	0.0277778	32	0	aa_194del	0.2292
HLA-G	54	0.972222	32	1	aa_194R	0.229
HLA-G	54	0.0277778	32	0	aa_195del	0.2292
HLA-G	54	0.972222	32	1	aa_195Y	0.229
HLA-G	54	0.972222	32	1	aa_196L	0.229
HLA-G	54	0.0277778	32	0	aa_196del	0.2292
HLA-G	54	0.972222	32	1	aa_197E	0.229
HLA-G	54	0.0277778	32	0	aa_197del	0.2292
HLA-G	54	0.0277778	32	0	aa_199K	0.2292
HLA-G	54	0.972222	32	1	aa_199G	0.229
HLA-G	54	0.972222	32	1	aa_200K	0.229
HLA-G	54	0.0277778	32	0	aa_200G	0.2292
HLA-G	54	0.0277778	32	0	aa_202P	0.2292
HLA-G	54	0.972222	32	1	aa_202M	0.229
HLA-G	54	0.0277778	32	0	aa_203T	0.2292
HLA-G	54	0.972222	32	1	aa_203L	0.229
HLA-G	54	0.972222	32	1	aa_204Q	0.229
HLA-G	54	0.0277778	32	0	aa_204W	0.2292
HLA-G	54	0.972222	32	1	aa_207D	0.229
HLA-G	54	0.0277778	32	0	aa_207del	0.2292
HLA-G	54	0.0277778	32	0	aa_208del	0.2292
HLA-G	54	0.972222	32	1	aa_208P	0.229
HLA-G	54	0.972222	32	1	aa_209P	0.229
HLA-G	54	0.0277778	32	0	aa_209del	0.2292
HLA-G	54	0.0277778	32	0	aa_210del	0.2292
HLA-G	54	0.972222	32	1	aa_210K	0.229
HLA-G	54	0.972222	32	1	aa_211T	0.229
HLA-G	54	0.0277778	32	0	aa_211del	0.2292
HLA-G	54	0.972222	32	1	aa_212H	0.229
HLA-G	54	0.0277778	32	0	aa_212del	0.2292
HLA-G	54	0.0277778	32	0	aa_213del	0.2292
HLA-G	54	0.972222	32	1	aa_213V	0.229
HLA-G	54	0.0277778	32	0	aa_214del	0.2292
HLA-G	54	0.972222	32	1	aa_214T	0.229
HLA-G	54	0.972222	32	1	aa_215H	0.229
HLA-G	54	0.0277778	32	0	aa_215del	0.2292
HLA-G	54	0.0277778	32	0	aa_216del	0.2292
HLA-G	54	0.972222	32	1	aa_216H	0.229
HLA-G	54	0.0277778	32	0	aa_217del	0.2292
HLA-G	54	0.972222	32	1	aa_217P	0.229
HLA-G	54	0.972222	32	1	aa_218V	0.229
HLA-G	54	0.0277778	32	0	aa_218del	0.2292
HLA-G	54	0.972222	32	1	aa_219F	0.229
HLA-G	54	0.0277778	32	0	aa_219del	0.2292
HLA-G	54	0.972222	32	1	aa_220D	0.229
HLA-G	54	0.0277778	32	0	aa_220del	0.2292
HLA-G	54	0.0277778	32	0	aa_221del	0.2292
HLA-G	54	0.972222	32	1	aa_221Y	0.229
HLA-G	54	0.0277778	32	0	aa_222del	0.2292
HLA-G	54	0.972222	32	1	aa_222E	0.229
HLA-G	54	0.0277778	32	0	aa_223del	0.2292
HLA-G	54	0.972222	32	1	aa_223A	0.229
HLA-G	54	0.0277778	32	0	aa_224del	0.2292
HLA-G	54	0.972222	32	1	aa_224T	0.229
HLA-G	54	0.0277778	32	0	aa_225del	0.2292
HLA-G	54	0.972222	32	1	aa_225L	0.229
HLA-G	54	0.0277778	32	0	aa_227A	0.2292
HLA-G	54	0.972222	32	1	aa_227C	0.229
HLA-G	54	0.0277778	32	0	aa_229S	0.2292
HLA-G	54	0.972222	32	1	aa_229A	0.229
HLA-G	54	0.972222	32	1	aa_230L	0.229
HLA-G	54	0.0277778	32	0	aa_230del	0.2292
HLA-G	54	0.972222	32	1	aa_231G	0.229
HLA-G	54	0.0277778	32	0	aa_231del	0.2292
HLA-G	54	0.0277778	32	0	aa_232del	0.2292
HLA-G	54	0.972222	32	1	aa_232F	0.229
HLA-G	54	0.0277778	32	0	aa_233del	0.2292
HLA-G	54	0.972222	32	1	aa_233Y	0.229
HLA-G	54	0.0277778	32	0	aa_234del	0.2292
HLA-G	54	0.972222	32	1	aa_234P	0.229
HLA-G	54	0.972222	32	1	aa_235A	0.229
HLA-G	54	0.0277778	32	0	aa_235del	0.2292
HLA-G	54	0.0277778	32	0	aa_236del	0.2292
HLA-G	54	0.972222	32	1	aa_236E	0.229
HLA-G	54	0.972222	32	1	aa_237I	0.229
HLA-G	54	0.0277778	32	0	aa_237del	0.2292
HLA-G	54	0.972222	32	1	aa_238I	0.229
HLA-G	54	0.0277778	32	0	aa_238del	0.2292
HLA-G	54	0.972222	32	1	aa_239L	0.229
HLA-G	54	0.0277778	32	0	aa_239del	0.2292
HLA-G	54	0.0277778	32	0	aa_240del	0.2292
HLA-G	54	0.972222	32	1	aa_240T	0.229
HLA-G	54	0.0277778	32	0	aa_241del	0.2292
HLA-G	54	0.972222	32	1	aa_241W	0.229
HLA-G	54	0.0277778	32	0	aa_242del	0.2292
HLA-G	54	0.972222	32	1	aa_242Q	0.229
HLA-G	54	0.0277778	32	0	aa_243del	0.2292
HLA-G	54	0.972222	32	1	aa_243R	0.229
HLA-G	54	0.0277778	32	0	aa_244del	0.2292
HLA-G	54	0.972222	32	1	aa_244D	0.229
HLA-G	54	0.972222	32	1	aa_245G	0.229
HLA-G	54	0.0277778	32	0	aa_245del	0.2292
HLA-G	54	0.972222	32	1	aa_246E	0.229
HLA-G	54	0.0277778	32	0	aa_246del	0.2292
HLA-G	54	0.972222	32	1	aa_247D	0.229
HLA-G	54	0.0277778	32	0	aa_247del	0.2292
HLA-G	54	0.0277778	32	0	aa_248del	0.2292
HLA-G	54	0.972222	32	1	aa_248Q	0.229
HLA-G	54	0.972222	32	1	aa_249T	0.229
HLA-G	54	0.0277778	32	0	aa_249del	0.2292
HLA-G	54	0.0277778	32	0	aa_250del	0.2292
HLA-G	54	0.972222	32	1	aa_250Q	0.229
HLA-G	54	0.0277778	32	0	aa_251del	0.2292
HLA-G	54	0.972222	32	1	aa_251D	0.229
HLA-G	54	0.0277778	32	0	aa_252del	0.2292
HLA-G	54	0.972222	32	1	aa_252V	0.229
HLA-G	54	0.0277778	32	0	aa_253del	0.2292
HLA-G	54	0.972222	32	1	aa_253E	0.229
HLA-G	54	0.0277778	32	0	aa_254del	0.2292
HLA-G	54	0.972222	32	1	aa_254L	0.229
HLA-G	54	0.0277778	32	0	aa_255del	0.2292
HLA-G	54	0.972222	32	1	aa_255V	0.229
HLA-G	54	0.972222	32	1	aa_256E	0.229
HLA-G	54	0.0277778	32	0	aa_256del	0.2292
HLA-G	54	0.0277778	32	0	aa_257del	0.2292
HLA-G	54	0.972222	32	1	aa_257T	0.229
HLA-G	54	0.0277778	32	0	aa_258del	0.2292
HLA-G	54	0.972222	32	1	aa_258R	0.229
HLA-G	54	0.0277778	32	0	aa_259del	0.2292
HLA-G	54	0.972222	32	1	aa_259P	0.229
HLA-G	54	0.0277778	32	0	aa_260del	0.2292
HLA-G	54	0.972222	32	1	aa_260A	0.229
HLA-G	54	0.972222	32	1	aa_261G	0.229
HLA-G	54	0.0277778	32	0	aa_261del	0.2292
HLA-G	54	0.972222	32	1	aa_262D	0.229
HLA-G	54	0.0277778	32	0	aa_262del	0.2292
HLA-G	54	0.972222	32	1	aa_264T	0.229
HLA-G	54	0.0277778	32	0	aa_264S	0.2292
HLA-G	54	0.972222	32	1	aa_265F	0.229
HLA-G	54	0.0277778	32	0	aa_265T	0.2292
HLA-G	54	0.0277778	32	0	aa_266D	0.2292
HLA-G	54	0.972222	32	1	aa_266Q	0.229
HLA-G	54	0.0277778	32	0	aa_267T	0.2292
HLA-G	54	0.972222	32	1	aa_267K	0.229
HLA-G	54	0.972222	32	1	aa_269A	0.229
HLA-G	54	0.0277778	32	0	aa_269del	0.2292
HLA-G	54	0.972222	32	1	aa_270A	0.229
HLA-G	54	0.0277778	32	0	aa_270del	0.2292
HLA-G	54	0.972222	32	1	aa_271V	0.229
HLA-G	54	0.0277778	32	0	aa_271del	0.2292
HLA-G	54	0.972222	32	1	aa_272V	0.229
HLA-G	54	0.0277778	32	0	aa_272del	0.2292
HLA-G	54	0.0277778	32	0	aa_273del	0.2292
HLA-G	54	0.972222	32	1	aa_273V	0.229
HLA-G	54	0.0277778	32	0	aa_274del	0.2292
HLA-G	54	0.972222	32	1	aa_274P	0.229
HLA-G	54	0.0277778	32	0	aa_275del	0.2292
HLA-G	54	0.972222	32	1	aa_275S	0.229
HLA-G	54	0.972222	32	1	aa_276G	0.229
HLA-G	54	0.0277778	32	0	aa_276del	0.2292
HLA-G	54	0.972222	32	1	aa_277E	0.229
cHLA-G	54	0.0277778	32	0	aa_277R	0.2292
HLA-G	54	0.972222	32	1	aa_278E	0.229
HLA-G	54	0.0277778	32	0	aa_278T	0.2292
HLA-G	54	0.972222	32	1	aa_279Q	0.229
HLA-G	54	0.0277778	32	0	aa_279G	0.2292
HLA-G	54	0.0277778	32	0	aa_281R	0.2292
HLA-G	54	0.972222	32	1	aa_281Y	0.229
HLA-G	54	0.0648148	32	0.046875	aa_282M	0.7498
HLA-G	54	0.907407	32	0.953125	aa_282T	0.359
HLA-G	54	0.0277778	32	0	aa_282C	0.2292
HLA-G	54	0.0277778	32	0	aa_284del	0.2292
HLA-G	54	0.972222	32	1	aa_284H	0.229
HLA-G	54	0.972222	32	1	aa_285V	0.229
HLA-G	54	0.0277778	32	0	aa_285del	0.2292
HLA-G	54	0.972222	32	1	aa_286Q	0.229
HLA-G	54	0.0277778	32	0	aa_286del	0.2292
HLA-G	54	0.0277778	32	0	aa_287del	0.2292
HLA-G	54	0.972222	32	1	aa_287H	0.229
HLA-G	54	0.972222	32	1	aa_288E	0.229
HLA-G	54	0.0277778	32	0	aa_288del	0.2292
HLA-G	54	0.972222	32	1	aa_289G	0.229
HLA-G	54	0.0277778	32	0	aa_289del	0.2292
HLA-G	54	0.0277778	32	0	aa_290del	0.2292
HLA-G	54	0.972222	32	1	aa_290L	0.229
HLA-G	54	0.0277778	32	0	aa_291del	0.2292
HLA-G	54	0.972222	32	1	aa_291P	0.229
HLA-G	54	0.972222	32	1	aa_292E	0.229
HLA-G	54	0.0277778	32	0	aa_292del	0.2292
HLA-G	54	0.972222	32	1	aa_293P	0.229
HLA-G	54	0.0277778	32	0	aa_293del	0.2292
HLA-G	54	0.972222	32	1	aa_294L	0.229
HLA-G	54	0.0277778	32	0	aa_294del	0.2292
HLA-G	54	0.0277778	32	0	aa_295del	0.2292
HLA-G	54	0.972222	32	1	aa_295M	0.229
HLA-G	54	0.972222	32	1	aa_296L	0.229
HLA-G	54	0.0277778	32	0	aa_296del	0.2292
HLA-G	54	0.0277778	32	0	aa_297del	0.2292
HLA-G	54	0.972222	32	1	aa_297R	0.229
HLA-G	54	0.0277778	32	0	aa_298del	0.2292
HLA-G	54	0.972222	32	1	aa_298W	0.229
HLA-G	54	0.0277778	32	0	aa_299del	0.2292
HLA-G	54	0.972222	32	1	aa_299K	0.229
HLA-G	54	0.0277778	32	0	aa_300del	0.2292
HLA-G	54	0.972222	32	1	aa_300Q	0.229
HLA-G	54	0.972222	32	1	aa_301S	0.229
HLA-G	54	0.0277778	32	0	aa_301del	0.2292
HLA-G	54	0.0277778	32	0	aa_303A	0.2292
HLA-G	54	0.972222	32	1	aa_303L	0.229
HLA-G	54	0.972222	32	1	aa_304P	0.229
HLA-G	54	0.0277778	32	0	aa_304R	0.2292
HLA-G	54	0.972222	32	1	aa_306I	0.229
HLA-G	54	0.0277778	32	0	aa_306P	0.2292
HLA-G	54	0.0277778	32	0	aa_308del	0.2292
HLA-G	54	0.972222	32	1	aa_308I	0.229
HLA-G	54	0.0277778	32	0	aa_309del	0.2292
HLA-G	54	0.972222	32	1	aa_309M	0.229
HLA-G	54	0.0277778	32	0	aa_310del	0.2292
HLA-G	54	0.972222	32	1	aa_310G	0.229
HLA-G	54	0.0277778	32	0	aa_311del	0.2292
HLA-G	54	0.972222	32	1	aa_311I	0.229
HLA-G	54	0.0277778	32	0	aa_312del	0.2292
HLA-G	54	0.972222	32	1	aa_312V	0.229
HLA-G	54	0.0277778	32	0	aa_313del	0.2292
HLA-G	54	0.972222	32	1	aa_313A	0.229
HLA-G	54	0.0277778	32	0	aa_314del	0.2292
HLA-G	54	0.972222	32	1	aa_314G	0.229
HLA-G	54	0.0277778	32	0	aa_315del	0.2292
HLA-G	54	0.972222	32	1	aa_315L	0.229
HLA-G	54	0.0277778	32	0	aa_316del	0.2292
HLA-G	54	0.972222	32	1	aa_316V	0.229
HLA-G	54	0.0277778	32	0	aa_317del	0.2292
HLA-G	54	0.972222	32	1	aa_317V	0.229
HLA-G	54	0.0277778	32	0	aa_318del	0.2292
HLA-G	54	0.972222	32	1	aa_318L	0.229
HLA-G	54	0.0277778	32	0	aa_319del	0.2292
HLA-G	54	0.972222	32	1	aa_319A	0.229
HLA-G	54	0.972222	32	1	aa_320A	0.229
HLA-G	54	0.0277778	32	0	aa_320del	0.2292
HLA-G	54	0.0277778	32	0	aa_321del	0.2292
HLA-G	54	0.972222	32	1	aa_321V	0.229
HLA-G	54	0.0277778	32	0	aa_322del	0.2292
HLA-G	54	0.972222	32	1	aa_322V	0.229
HLA-G	54	0.972222	32	1	aa_323T	0.229
HLA-G	54	0.0277778	32	0	aa_323del	0.2292
HLA-G	54	0.0277778	32	0	aa_324del	0.2292
HLA-G	54	0.972222	32	1	aa_324G	0.229
HLA-G	54	0.972222	32	1	aa_325A	0.229
HLA-G	54	0.0277778	32	0	aa_325del	0.2292
HLA-G	54	0.0277778	32	0	aa_326del	0.2292
HLA-G	54	0.972222	32	1	aa_326A	0.229
HLA-G	54	0.0277778	32	0	aa_327del	0.2292
HLA-G	54	0.972222	32	1	aa_327V	0.229
HLA-G	54	0.0277778	32	0	aa_328del	0.2292
HLA-G	54	0.972222	32	1	aa_328A	0.229
HLA-G	54	0.972222	32	1	aa_329A	0.229
HLA-G	54	0.0277778	32	0	aa_329del	0.2292
HLA-G	54	0.0277778	32	0	aa_330del	0.2292
HLA-G	54	0.972222	32	1	aa_330V	0.229
HLA-G	54	0.0277778	32	0	aa_331del	0.2292
HLA-G	54	0.972222	32	1	aa_331L	0.229
HLA-G	54	0.0277778	32	0	aa_332del	0.2292
HLA-G	54	0.972222	32	1	aa_332W	0.229
HLA-G	54	0.972222	32	1	aa_334K	0.229
HLA-G	54	0.0277778	32	0	aa_334H	0.2292
HLA-G	54	0.972222	32	1	aa_335K	0.229
HLA-G	54	0.0277778	32	0	aa_335T	0.2292
HLA-G	54	0.0277778	32	0	aa_336X	0.2292
HLA-G	54	0.972222	32	1	aa_336S	0.229
HLA-G	54	0.972222	32	1	aa_337S	0.229
HLA-G	54	0.0277778	32	0	aa_337del	0.2292
HLA-G	54	0.972222	32	1	aa_338D	0.229
HLA-G	54	0.0277778	32	0	aa_338del	0.2292
HLA-G	54	0.972222	32	1	aa_339X	0.229
HLA-G	54	0.0277778	32	0	aa_339del	0.2292
MICA	54	0.981481	32	0.953125	aa_29R	0.2848
MICA	54	0.0185185	32	0.046875	aa_29P	0.28484
MICA	54	0.731481	32	0.796875	aa_37W	0.3869
MICA	54	0.268519	32	0.203125	aa_37G	0.38685
MICA	54	0.935185	32	0.9375	aa_47A	0.9841
MICA	54	0.0648148	32	0.0625	aa_47T	0.9841
MICA	54	0.00925926	32	0	aa_49G	0.43026
MICA	54	0.990741	32	1	aa_49V	0.43
MICA	54	0.638889	32	0.71875	aa_59Y	0.3845
MICA	54	0.361111	32	0.28125	aa_59C	0.38454
MICA	54	0.037037	32	0.03125	aa_114R	0.8611
MICA	54	0.962963	32	0.96875	aa_114Q	0.861
MICA	54	0.675926	32	0.78125	aa_145L	0.251
MICA	54	0.324074	32	0.21875	aa_145V	0.25102
MICA	54	0.972222	32	0.96875	aa_148E	0.862
MICA	54	0.0277778	32	0.03125	aa_148K	0.8622
MICA	54	0.638889	32	0.71875	aa_152V	0.3845
MICA	54	0.361111	32	0.28125	aa_152M	0.38454
MICA	54	0.962963	32	0.9375	aa_174M	0.7181
MICA	54	0.037037	32	0.0625	aa_174V	0.7181
MICA	54	0.00925926	32	0.015625	aa_179L	0.6179
MICA	54	0.990741	32	0.984375	aa_179H	0.618
MICA	54	0.638889	32	0.71875	aa_196E	0.3845
MICA	54	0.361111	32	0.28125	aa_196K	0.38454
MICA	54	0.601852	32	0.640625	aa_198G	0.6504
MICA	54	0.398148	32	0.359375	aa_198S	0.6504
MICA	54	0.990741	32	0.96875	aa_199V	0.3493
MICA	54	0.00925926	32	0.03125	aa_199I	0.34927
MICA	54	0.194444	32	0.078125	aa_204R	0.06651
MICA	54	0.805556	32	0.921875	aa_204T	0.0665
MICA	54	0.361111	32	0.28125	aa_229G	0.38454
MICA	54	0.638889	32	0.71875	aa_229S	0.3845
MICA	54	0.638889	32	0.71875	aa_233R	0.3845
MICA	54	0.361111	32	0.28125	aa_233W	0.38454
MICA	54	0.314815	32	0.5	aa_236I	0.0509
MICA	54	0.685185	32	0.5	aa_236T	0.05092
MICA	54	0.638889	32	0.71875	aa_238T	0.3845
MICA	54	0.361111	32	0.28125	aa_238S	0.38454
MICA	54	0.944444	32	0.9375	aa_244V	0.9726
MICA	54	0.0555556	32	0.0625	aa_244L	0.9726
MICA	54	0.314815	32	0.5	aa_274R	0.0509
MICA	54	0	32	0.015625	aa_274E	0.09989
MICA	54	0.685185	32	0.484375	aa_274Q	0.024633
MICA	54	0.0462963	32	0.0625	aa_294A	0.952
MICA	54	0.953704	32	0.9375	aa_294P	0.952
MICA	54	0.962963	32	0.96875	aa_300V	0.861
MICA	54	0.037037	32	0.03125	aa_300C	0.8611
MICA	54	0.962963	32	0.96875	aa_301L	0.861
MICA	54	0.037037	32	0.03125	aa_301W	0.8611
MICA	54	0.962963	32	0.96875	aa_302del	0.861
MICA	54	0.037037	32	0.03125	aa_302C	0.8611
MICA	54	0.962963	32	0.96875	aa_303del	0.861
MICA	54	0.037037	32	0.03125	aa_303F	0.8611
MICA	54	0.037037	32	0.03125	aa_304R	0.8611
MICA	54	0.962963	32	0.96875	aa_304del	0.861
MICA	54	0.962963	32	0.96875	aa_306L	0.861
MICA	54	0.037037	32	0.03125	aa_306I	0.8611
MICA	54	0.037037	32	0.03125	aa_307G	0.8611
MICA	54	0.962963	32	0.96875	aa_307Q	0.861
MICA	54	0.962963	32	0.96875	aa_308S	0.861
MICA	54	0.037037	32	0.03125	aa_308R	0.8611
MICA	54	0.962963	32	0.96875	aa_310W	0.861
MICA	54	0.037037	32	0.03125	aa_310del	0.8611
MICA	54	0.962963	32	0.96875	aa_311Q	0.861
MICA	54	0.037037	32	0.03125	aa_311S	0.8611
MICA	54	0.037037	32	0.03125	aa_312M	0.8611
MICA	54	0.962963	32	0.96875	aa_312T	0.861
MICA	54	0.037037	32	0.03125	aa_314L	0.8611
MICA	54	0.962963	32	0.96875	aa_314H	0.861
MICA	54	0.037037	32	0.03125	aa_315L	0.8611
MICA	54	0.962963	32	0.96875	aa_315V	0.861
MICA	54	0.962963	32	0.96875	aa_316S	0.861
MICA	54	0.037037	32	0.03125	aa_316L	0.8611
MICA	54	0.037037	32	0.03125	aa_317L	0.8611
MICA	54	0.962963	32	0.96875	aa_317A	0.861
MICA	54	0.962963	32	0.96875	aa_318V	0.861
MICA	54	0.037037	32	0.03125	aa_318L	0.8611
MICA	54	0.185185	32	0.109375	aa_319A	0.3121
MICA	54	0.814815	32	0.890625	aa_319del	0.312
MICA	54	0.185185	32	0.109375	aa_320A	0.3121
MICA	54	0.814815	32	0.890625	aa_320del	0.312
MICA	54	0.185185	32	0.109375	aa_321A	0.3121
MICA	54	0.814815	32	0.890625	aa_321del	0.312
MICA	54	0.407407	32	0.578125	aa_322del	0.1036
MICA	54	0.555556	32	0.390625	aa_322A	0.11723
MICA	54	0.037037	32	0.03125	aa_322L	0.8611
MICA	54	0.87037	32	0.890625	aa_323A	0.8386
MICA	54	0.0925926	32	0.078125	aa_323del	0.8964
MICA	54	0.037037	32	0.03125	aa_323L	0.8611
MICA	54	0.037037	32	0.03125	aa_324L	0.8611
MICA	54	0.962963	32	0.96875	aa_324A	0.861
MICA	54	0.212963	32	0.34375	aa_325G	0.1059
MICA	54	0.75	32	0.625	aa_325A	0.12769
MICA	54	0.037037	32	0.03125	aa_325L	0.8611
MICA	54	0.037037	32	0.03125	aa_326L	0.8611
MICA	54	0.212963	32	0.34375	aa_326C	0.1059
MICA	54	0.75	32	0.625	aa_326A	0.12769
MICA	54	0.75	32	0.625	aa_327A	0.12769
MICA	54	0.037037	32	0.03125	aa_327L	0.8611
MICA	54	0.212963	32	0.34375	aa_327C	0.1059
MICA	54	0.212963	32	0.34375	aa_328Y	0.1059
MICA	54	0.75	32	0.625	aa_328I	0.12769
MICA	54	0.037037	32	0.03125	aa_328L	0.8611
MICA	54	0.037037	32	0.03125	aa_330L	0.8611
MICA	54	0.75	32	0.625	aa_330V	0.12769
MICA	54	0.212963	32	0.34375	aa_330C	0.1059
MICA	54	0.212963	32	0.34375	aa_331del	0.1059
MICA	54	0.037037	32	0.03125	aa_331L	0.8611
MICA	54	0.75	32	0.625	aa_331I	0.12769
MICA	54	0.75	32	0.625	aa_332I	0.12769
MICA	54	0.037037	32	0.03125	aa_332L	0.8611
MICA	54	0.212963	32	0.34375	aa_332del	0.1059
MICA	54	0.212963	32	0.34375	aa_333Y	0.1059
MICA	54	0.037037	32	0.03125	aa_333L	0.8611
MICA	54	0.75	32	0.625	aa_333I	0.12769
MICA	54	0.787037	32	0.65625	aa_334F	0.10589
MICA	54	0.212963	32	0.34375	aa_334Y	0.1059
MICA	54	0.962963	32	0.96875	aa_335Y	0.861
MICA	54	0.037037	32	0.03125	aa_335S	0.8611
MICA	54	0.212963	32	0.34375	aa_336F	0.1059
MICA	54	0.75	32	0.625	aa_336V	0.12769
MICA	54	0.037037	32	0.03125	aa_336T	0.8611
MICA	54	0.037037	32	0.03125	aa_337del	0.8611
MICA	54	0.231481	32	0.171875	aa_337C	0.40866
MICA	54	0.518519	32	0.453125	aa_337R	0.42941
MICA	54	0.212963	32	0.34375	aa_337L	0.1059
MICA	54	0.037037	32	0.03125	aa_338del	0.8611
MICA	54	0.962963	32	0.96875	aa_338C	0.861
MICA	54	0.75	32	0.625	aa_339C	0.12769
MICA	54	0.25	32	0.375	aa_339del	0.128
MICA	54	0.75	32	0.625	aa_340K	0.12769
MICA	54	0.25	32	0.375	aa_340del	0.128
MICA	54	0.25	32	0.375	aa_341del	0.128
MICA	54	0.75	32	0.625	aa_341K	0.12769
MICA	54	0.75	32	0.625	aa_342K	0.12769
MICA	54	0.25	32	0.375	aa_342del	0.128
MICA	54	0.25	32	0.375	aa_343del	0.128
MICA	54	0.75	32	0.625	aa_343T	0.12769
MICA	54	0.25	32	0.375	aa_344del	0.128
MICA	54	0.75	32	0.625	aa_344S	0.12769
MICA	54	0.25	32	0.375	aa_345del	0.128
MICA	54	0.75	32	0.625	aa_345A	0.12769
MICA	54	0.75	32	0.625	aa_346A	0.12769
MICA	54	0.25	32	0.375	aa_346del	0.128
MICA	54	0.75	32	0.625	aa_347E	0.12769
MICA	54	0.25	32	0.375	aa_347del	0.128
[truncated: 191 more rows]
